# Supplementary material for: Halogen bonding in differently charged complexes: basic profile, essential interaction terms and intrinsic σ-hole
Source: Royal Society of Chemistry journal article supplement (doi:10.1039/c9cp01379b), 2019-01-01
Supplement: c9cp01379b1.pdf [file c9cp01379b1.pdf]

## Supplementary Information

### Halogen Bonding in Differently Charged Complexes: Basic Profile, Essential Interaction Terms and Intrinsic $\sigma$ -Hole

Zhengdan Zhu,<sup>#[a,b]</sup> Guimin Wang,<sup>#[a,b]</sup> Zhijian Xu,<sup>\*[a,b]</sup> Zhaoqiang Chen,<sup>[a,b]</sup> Jinan Wang,<sup>[a,b]</sup> Jiye Shi,<sup>[a]</sup>  
and Weiliang Zhu<sup>\*[a,b,c]</sup>

[a] CAS Key Laboratory of Receptor Research, Drug Discovery and Design Center, Shanghai Institute of Materia Medica, Chinese Academy of Sciences, Shanghai 201203, China.

[b] University of Chinese Academy of Sciences, Beijing 100049, China.

[c] Open Studio for Druggability Research of Marine Natural Products, Pilot National Laboratory for Marine Science and Technology (Qingdao), 1 Wenhai Road, Aoshanwei, Jimo, Qingdao, 266237, China.

# Z.Z. and G.W. contributed equally to this work.

\*Emails: [zjxu@simm.ac.cn](mailto:zjxu@simm.ac.cn) (Z.X.); [wzhu@simm.ac.cn](mailto:wzhu@simm.ac.cn) (W.Z.)

## Contents

|                                                           |      |
|-----------------------------------------------------------|------|
| 1. Computational Details .....                            | S3   |
| 2. Figures.....                                           | S13  |
| 3. Tables .....                                           | S30  |
| 4. References.....                                        | S97  |
| 5. Cartesian Coordinates of All Optimized Geometries..... | S100 |

## 1. Computational Details

### 1.1 PDB survey

Complex structures in the Protein Data Bank<sup>1</sup> (PDB, July 2018 release) with halogenated ligands were surveyed to demonstrate the existence of all 9 different charged XB-like interactions. The restriction criterion of interaction distance was set to be less than the sum of atomic van der Waals radii + 0.1 angstrom while that of interaction angle to be larger than 140°. The Epik module in the Schrödinger program suite<sup>2</sup> was applied to predict the protonation status of the complexes. 9 structures with typical halogen bonding patterns and resolutions of 3.0 Å or better were chosen to be presented in Figure S1. However, rather than an exhaustive investigation, we surveyed the PDB only for 9 types of typical structures (which may not be the best) that take halogen “diversity” (4 cases for Cl, 3 for Br, 2 for I in the 9 selected cases) into consideration. The number of cases in each type was not counted.

### 1.2 Geometry Optimization

Geometry optimization was performed with Gaussian 09 program suite<sup>3</sup> using the M06-2X functional<sup>4</sup> either in the gas phase or with implicit solvents, including chloroform (TCM), dichloroethane (DCE), acetone, DMSO and water. The default IEFPCM (Polarizable Continuum Model using the Integral Equation Formalism variant) solvent model<sup>5</sup> was applied to determine solvent effects. Default settings were applied for all parameters in the IEFPCM model including UFF for atomic radii, scaled vdW for cavity type, GePol for cavity algorithm and so on. As suggested by Tomasi et al.,<sup>6</sup> rather than absolute precise values that are comparable with experimental results, what really expected are the trends when

apply theoretical calculations to chemical problems. Calculations showed that there is no significant difference in tendency of intermolecular binding energies with changes in atomic radii applied in the solvent model (Table S27-S29). The triple- $\zeta$  basis set 6-311++G(d,p), having considered diffusion functions for the better description of intermolecular weak interactions, especially those involved anionic molecules, was employed for all atoms except iodine, for which the Stuttgart/Dresden effective core pseudopotentials (SDD) and its associated basis set was adopted. Frequency analysis was conducted at the same calculation level with geometry optimizations for the local energy minima confirmation.

However, not all the complex can be optimized to the expected geometry. Disturbed by the potential interactions within the substituent groups of the model molecules, the ideal halogen-bonded geometry is not easy to be obtained owing to its intrinsically weak interaction energy. Yet, optimized structure without imaginary frequencies could be obtained as well by fixing the particular plane angles or dihedral angles (see the annotations following the Cartesian coordinates of the corresponding optimized geometries for details) and conducting constrained optimization using the ModRedundant option. For a portion of extreme cases in vacuum, halogen-bonded dimers were not obtained even using constrained optimization, probably owing to the strong intermolecular repulsive or attractive interactions. In these specific cases, single-point energy calculations were performed on the TCM-optimized geometries to estimate the binding energy for reference.

### **1.3 Binding Energy Calculation**

The binding energy was determined by subtracting the electronic energy of the halogen bonding donor

and acceptor from that of the molecular complex (see eq 1 in the manuscript). The basis set superposition error (BSSE) was estimated by counterpoise corrections<sup>7</sup> using the COUNTERPOISE keyword. We performed the corrections in vacuum for all solvent phase cases since conducting counterpoise tasks with implicit solvent models is not allowed in Gaussian 09. The alternative approach to perform counterpoise correlations with implicit solvents via setting ghost atoms marked by Bq (eq S1) is debatable, since the difference in environmental molecular distribution of molecular units and complexes, in other words, the difference in cavities of the solutes in the implicit solvent model, will make the precondition of eq S1 untenable, leading the calculated BSSE to be even negative.

$$\text{BSSE} = E_{A\_AB}^S - E_{A\_Bq}^S + E_{B\_AB}^S - E_{B\_Bq}^S \quad \text{S1}$$

Here,  $E_{A\_AB}^S$  and  $E_{B\_AB}^S$  are the electronic energies of the structures extracted from the complex geometry in solvent phase with their respective basis sets, while  $E_{A\_Bq}^S$  and  $E_{B\_Bq}^S$  are those calculated with basis sets superposed.

As a result, all BSSE values were estimated from the equivalent gas phase calculation for all solvent phase optimized geometries.

#### 1.4 Energy Decomposition Analysis

Energy decomposition analysis was performed using the ETS-NOCV method based on ADF program package<sup>8</sup> with optimized geometries obtained from Gaussian 09 results. The PBE functional<sup>9</sup> combined with Grimme's DFT-D3 correction<sup>10</sup> improved by a moderate BJ damping function<sup>11</sup> was applied for the assessment of dispersion terms. Standard double- $\zeta$  STO basis set with one set of polarization functions

DZP was used for the hydrogen atom while standard triple- $\zeta$  STO basis set with one set of polarization functions TZP was used for other atoms except bromine and iodine, for which relativistic effects were considered with zero-order regular approximation (ZORA) and standard triple- $\zeta$  STO basis set with two sets of polarization functions TZ2P was adopted. Solvent effects were evaluated using Conductor like Screening Model (COSMO)<sup>12</sup> of solvation as implemented in ADF program. The empirical scaling factor  $x$  (eq S2) is specified as 0.5 for chloroform and the default 0 for other solvents to gain essentially better results, especially in solvents with relative small dielectric constant.<sup>6, 13</sup>

$$f(\varepsilon) = (\varepsilon - 1) / (\varepsilon + x) \quad \text{S2}$$

Here,  $f(\varepsilon)$  is the scaling function of energy-related terms,  $\varepsilon$  is the dielectric constant and  $x$  is the empirical scaling factor.

### 1.5 QTAIM Analysis

The quantum theory of atoms in molecules (QTAIM)<sup>14</sup> has been widely applied to describe the concepts of atoms and bonds in various chemical systems by conducting topologic analysis of molecular electron density. According to the QTAIM theory, electronic properties at the bond critical points (BCPs), including electron density ( $\rho$ ) and its Laplacian ( $\nabla^2\rho$ ), total energy density ( $H$ ), potential energy density ( $V$ ), kinetic energy density ( $G$ ), and the ratio of the absolute value of the first eigenvalue of the Hessian matrix and the corresponding third eigenvalue ( $|\lambda_1|/\lambda_3$ ), are considered to be highly referential to characterize the interactions. Specially, the Laplacian value represents the curvature of the electron density. Positive or negative Laplacian values stand for locally depleted or concentrated electron density,

respectively. Here in our study, QTAIM analysis was performed using the Multiwfn (version 3.4) program<sup>15</sup> with wave functions obtained from Gaussian 09 results.

### 1.6 NCI Analysis

The non-covalent interactions (NCI) method could be applied<sup>16</sup> to distinguish non-covalent interactions from various terms by a combination of reduced density gradient (RDG) and electron density ( $\rho$ ) multiplied by the sign of the second eigenvalue of the Hessian matrix ( $\text{sign}(\lambda_2)$ ).<sup>17</sup> We carried out the NCI analysis using the Multiwfn (version 3.4) program<sup>15</sup> with wave functions obtained from Gaussian 09 results. In order to plot the relevant results with high quality and to economize on computation and storage space, we specially focused the probe points in the halogen-bonded region, rather than the whole molecular system. Hence, a million probe points, consisted of 100 points in each dimension, were applied in a grid space centered on the midpoint of the halogen and the corresponding acceptor oxygen atom, with the extension distance of 4.5 Bohr in the respective  $X$ ,  $Y$ ,  $Z$  direction. Plots of the RDG versus the electron density ( $\rho$ ) multiplied by the sign of the second eigenvalue of the Hessian matrix ( $\text{sign}(\lambda_2)$ ), which distinguishes attractive or repulsive interactions with its negative or positive value, respectively, were presented in our study to probe into the non-covalent profiles (Figure S3-S5).

### 1.7 Hirshfeld Population Analysis

The Hirshfeld population analysis (HPA)<sup>18</sup> was conducted for further confirming the results observed in natural population analysis (NPA). This process was performed by Multiwfn<sup>15</sup> with wave functions obtained from Gaussian 09 results using the build-in atomic densities in free-states in the Multiwfn

programe.

### **1.8 Electron Density Difference Calculation**

The electron density difference (EDD) was calculated by subtracting electron density of the individual molecular subunits from the whole system. This process was conducted by Multiwfn<sup>15</sup> with wave functions obtained from Gaussian 09 results.

### **1.9 Surface Electrostatic Potential Calculation**

The electrostatic potentials (ESPs) were calculated using the Multiwfn (version 3.4) program<sup>15</sup> with wave functions obtained from Gaussian 09 results. In our study, all the ESPs were generated on the 0.001 electrons/Bohr<sup>3</sup> isosurface of electronic density.

### **1.10 Calculation of $E_{\text{bind}_X}$**

The net binding energy ( $E_{\text{bind}_X}$ ) between the halogen atom and the corresponding XB acceptor is calculated by excluding the contribution of intermolecular Coulombic interactions and other potential non-covalent terms (the background interactions) from the total binding energy (see eq 3 in the manuscript). Albeit Coulombic interactions are well-defined by the reported<sup>19</sup> point-charge model in charged molecules, the precise characterization of the point-charge position is challenging and without any rigorous and universal standard, owing to the charge delocalization in the whole molecule. On the other hand, electrostatic effects involving the neutral molecules could not be easily described by the point-charge model. Correlations leaving out these systems will certainly reduce the systematic comparability and consequently preclude the application of the point-charge strategy in neutral halogen



bonding complexes. The “free radical” strategy enables us to estimate the contribution of the background interaction ( $E_{bg}$ ) at the same calculation level with total binding energies. In detail,  $E_{bg}$  is calculated by subtracting the orbital interaction ( $E_{orb\_SCF}$ ) from the binding energy of free radicalized complex ( $E_{bind\_FR}$ ) (see eq 2 in the manuscript) for the applied molecules (Figure S8).  $E_{orb\_SCF}$ , originates from the mix of occupied and virtual molecular orbitals, is determined by eq S3, according to that is defined in Multiwfn.<sup>15</sup>

$$E_{orb\_SCF} = E_{SCF\_Last} - E_{SCF\_First} \quad S3$$

Here,  $E_{orb\_SCF}$  is the orbital interaction term evaluated at the same calculation level with total binding energy.  $E_{SCF\_Last}$  and  $E_{SCF\_First}$  are the corresponding electronic energy of wave functions obtained after and before the SCF iteration process, in other words, after and before the mix of molecular orbitals, respectively. In detail,  $E_{SCF\_Last}$  equals to the electronic energy of the free radicalized complex, while combined fragment wave functions are applied as the complex wave function before the SCF iteration process.

### 1.11 Evaluating the Shape of Halogen Atoms

The axial ( $r_{ax}$ ) and radial ( $r_{rad}$ ) distances from the halogen atom to the molecular surface, and their ratios, are employed to evaluate the shape of the halogen atoms. In detail,  $r_{ax}$  and  $r_{rad}$  stand for the closest distances from nuclei position of the halogen atom to its molecular surface along axial and radial directions of the C-X covalent bond, respectively, as illustrated in Figure S7. Notably,  $r_{rad}$  is determined by calculating the distance from the nuclei position to all probe points on the halogen atomic surface

along the radial direction, and then figuring out the shortest, rather than simply (which is not simple in technique) measuring those coplanar with the donor ring. Same with that has been mentioned in ESP calculations, the molecular surface was defined as the 0.001 electrons/Bohr<sup>3</sup> isosurface of electronic density, and was calculated using the Multiwfn (version 3.4) program with wave functions obtained from Gaussian 09 results. The  $r_{ax}$  and  $r_{rad}$  values are provided respectively in Table S7 and Table S8.

### **1.12 Distribution of Electrostatic Potential on the Surface of Halogen Atoms**

The distribution of electrostatic potential on the surface of halogen atoms are presented to probe into the solvent effects in halogen bonding interaction. The electrostatic potential surface was obtained using the Multiwfn (version 3.4) program<sup>15</sup> as mentioned above. Cartesian coordinates for the probe points ( $A$ ) as well as the corresponding ESP values composing the electrostatic potential surface are all available in the Multiwfn analysis results. The  $AXC$  angle (Figure S14), is then measured for all probe points on the halogen atomic surface based on the corresponding Cartesian coordinates, rather than simply consider those coplanar with the donor ring. We thus plot the scatter diagrams (Figure S15) simply by extracting probe points with  $AXC$  angle values ranging from 90° to 180°, and presenting their ESP values, to explore the ESP distribution of the halogen atom.

### **1.13 Calculation of outer-sphere electron transfer activation barriers from the Marcus theory**

The outer-sphere electron transfer activation barriers from the Marcus theory<sup>20</sup> were calculated with Gaussian 09 following the similar scheme with that utilized by Rosokha et al.<sup>21</sup> The G4MP2 theory was applied<sup>22</sup> to calculate the gas-phase thermodynamic energy terms, while conductor-like polarizable

continuum model (CPCM) at HF/6-31+G(d) level with UAHF radii was used for solvation energies<sup>23</sup> and B3LYP/6-311G(d) level for intramolecular reorganization energy and effective molecular radii.

In detail, the outer-sphere electron transfer activation barrier  $\Delta G^*$  can be evaluated by eq. S4:

$$\Delta G^* = \lambda/4 \{1 + (\Delta G^0 + w_p)/\lambda\}^2 \quad \text{S4}$$

Here,  $\Delta G^0$  is the free energy that drives the electron transfer reaction in solvents, which was calculated with eq. S5. The G4MP2 theory was applied to evaluate the gas-phase free energy difference ( $\Delta G_{\text{gas}}$ ) between the reactants and products while CPCM for solvation energy difference ( $\Delta G_{\text{solv}}$ ).  $\Delta G_{\text{1atm-1M}}$  in eq. S5 refers to the free energy change from the standard state of gas phase to that of solvent phase while the multiple factor  $n$  refers to the equivalent difference between the products and reactants:

$$\Delta G^0 = \Delta G_{\text{gas}} + \Delta G_{\text{solv}} + n \times \Delta G_{\text{1atm-1M}} \quad \text{S5}$$

$w_p$  in eq S4 describes the work of bring the ionic reactants and products together, which was evaluated through the Coulomb formula as the electric potential difference between the reactants and products based on the effective molecular radii and van der Waals radius of the corresponding molecules and halogen atom respectively. The effective molecular radii were calculated at B3LYP/6-311G(d) level based on the structures optimized in the G4MP2 scheme with 2000 points per Bohr<sup>3</sup> for Monte-Carlo calculation of molar volume (IOp(6/45)=2000). Notably, the work term  $w_p$  equals to zero if no ion-ion interaction was presented among either reactants or products.

$\lambda$  in eq S4 is the total reorganization energy, which was evaluated with eq S6 following the suggestions of Saveant et al.<sup>21, 24</sup> to take into consideration the bond dissociation energy ( $D_{\text{RBr}}$ ) of the carbon-halogen

bond in XB donors. The C-X bond dissociation energies were calculated as the difference in enthalpies in the bond dissociation process applying the G4MP2 theory in gas phase. Intramolecular reorganization energies ( $\lambda_i$ ) of electron donors (XB acceptors) were calculated at B3LYP/6-311G(d) level based on the structures optimized in the G4MP2 scheme.  $\lambda_s$  refers to the solvent reorganization energy, which was evaluated with eq S7.<sup>20a, 25</sup>

$$\lambda = \lambda_i + \lambda_s + D_{\text{RBr}} \quad \text{S6}$$

$$\lambda_s = (1/\varepsilon_\infty - 1/\varepsilon_0) (Q_{\text{CT}} + u) (Q_{\text{CT}} - v) (1/2r_{\text{D}} + 1/2r_{\text{A}} - 1/r_{\text{DA}}) \quad \text{S7}$$

Here,  $\varepsilon_\infty$  and  $\varepsilon_0$  are the optical and static dielectric constants of solvents.  $Q_{\text{CT}}$  is the transferred charge in the NPA results (Table S18) while  $u$  and  $v$  refer to the original charge bears on the electron donor and acceptor, respectively.  $r_{\text{D}}$  and  $r_{\text{A}}$  are the effective molecular radii of the electron donor (XB acceptor) and electron acceptor (XB donor) respectively while  $r_{\text{DA}}$  refers to their separation.

The final results of outer-sphere electron transfer activation barriers from the Marcus theory are summarized in Table S26.

## 2. Figures

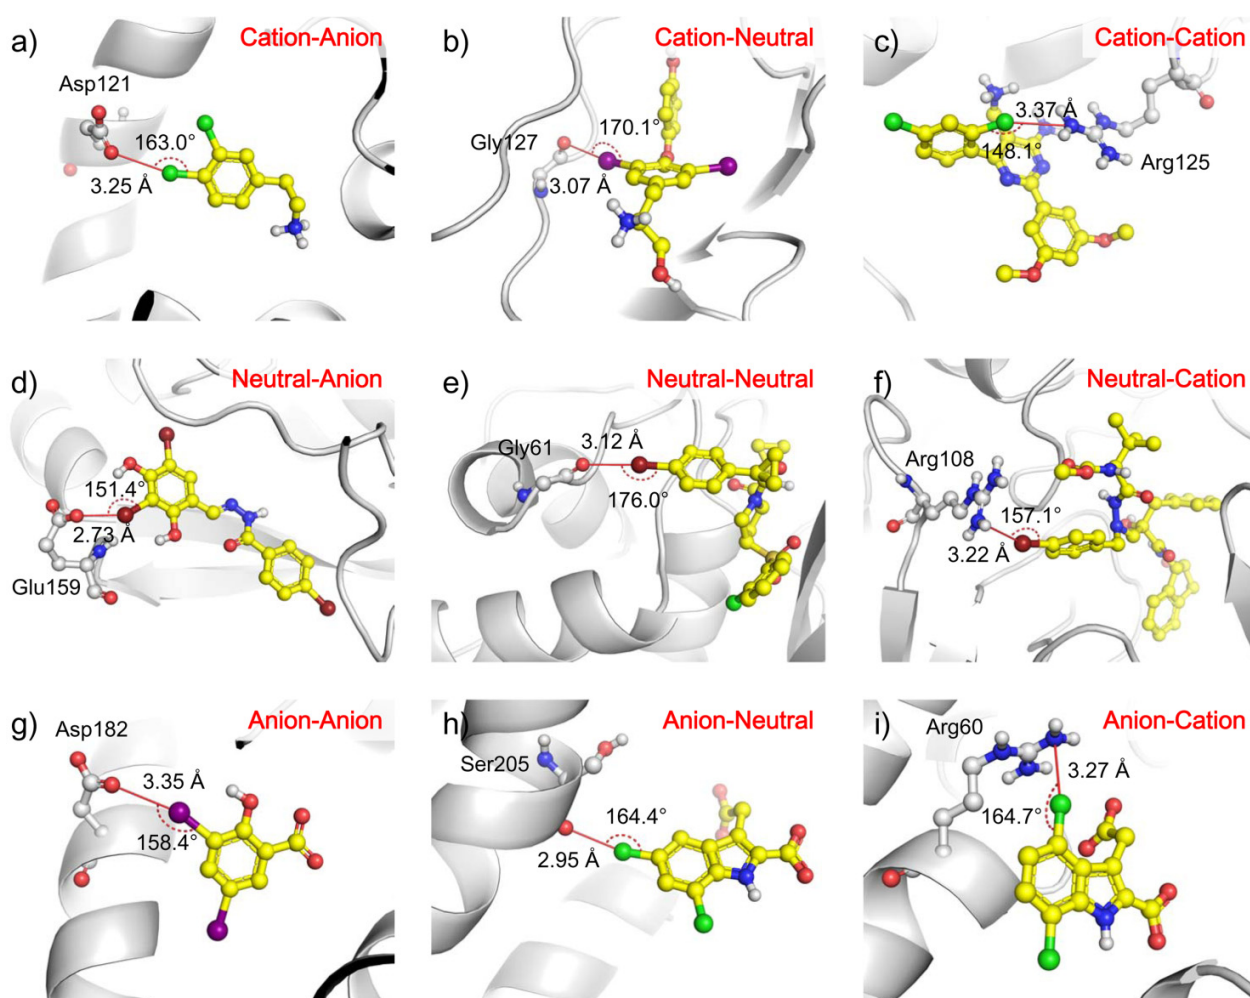

**Figure S1.** Selected cases for 9 types of differently charged XB-like interactions in PDB, including (a) 4XPA: cation-anion (hereinafter refer to that between cationic donor and anionic acceptor and so forth for others); (b) 3WGW: cation-neutral; (c) 1RWQ: cation-cation; (d) 3DP2: neutral-anion; (e) 2YJ2: neutral-neutral; (f) 2CEJ: neutral-cation; (g) 4J2V: anion-anion; (h) 3N5J: anion-neutral; (i) 3N5H: anion-cation. Ligands and the contacting residues are presented as balls and sticks whereas the protein backbones are shown in cartoon. Carbon atoms in ligands and residues are colored in yellow and white, respectively, while oxygen in red, nitrogen in blue, chloride in green, bromine in brown, iodine in purple and polar hydrogen in white. The protonation status of the ligands and residues are predicted with the Epik module in the Schrödinger program suite at  $\text{pH } 7.0 \pm 2.0$ .<sup>2</sup>

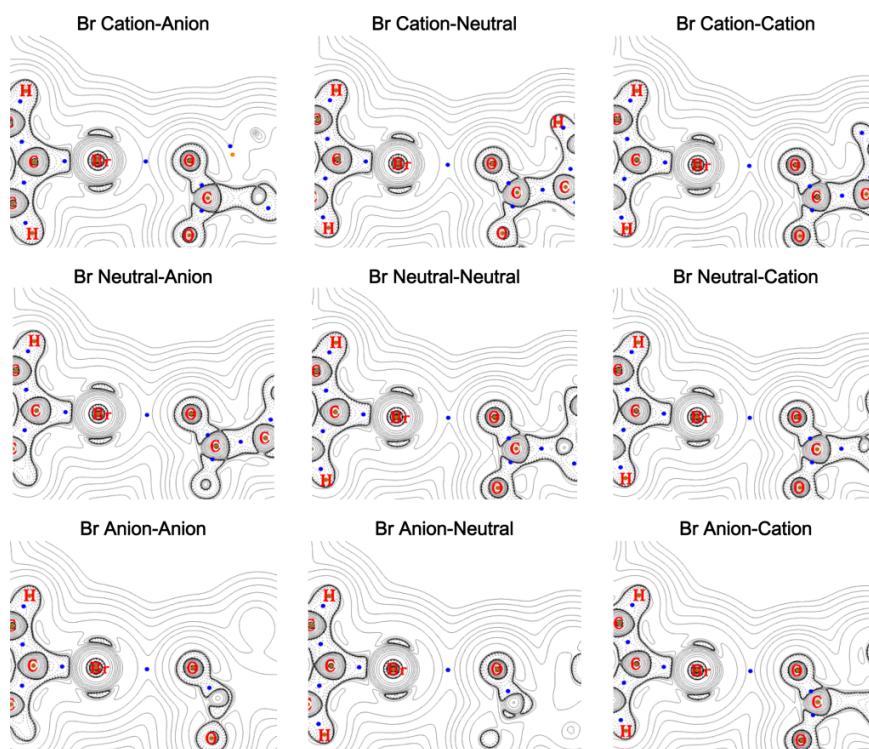

**Figure S2.** Contour maps of Laplacian distribution for the plane of intermolecular interaction in complexes represented by that between differently charged 3-amino-5-bromobenzoic acid and glycine. Solid and dashed lines stand for positive and negative regions of Laplacian, respectively. Blue points lying on the covalent and halogen bonds represent the bond critical points. Wave functions of optimized geometries in TCM are applied on behalf of all the systems, considering the single-point cases in vacuum. As shown in the figure, the bond critical point, where the electron density gradient modulus is zero, lies between the halogen atom and its corresponding oxygen, in the same way as that of covalent bonds. This means, whatever the molecular charge state is, the second saddle point of the electron density function always exists between the halogen and oxygen atom, where the curvature of the function is positive in one dimension and negative in the other two. Electrons are obviously more concentrated in the radial direction of the bromine atom than that along the C-Br covalent bond, revealing the anisotropic distribution of electrons. All these observations provide further evidence for the formation of intermolecular XBs as well as the intrinsic electrophilicity of a halogen's  $\sigma$ -hole region in all differently charged systems.

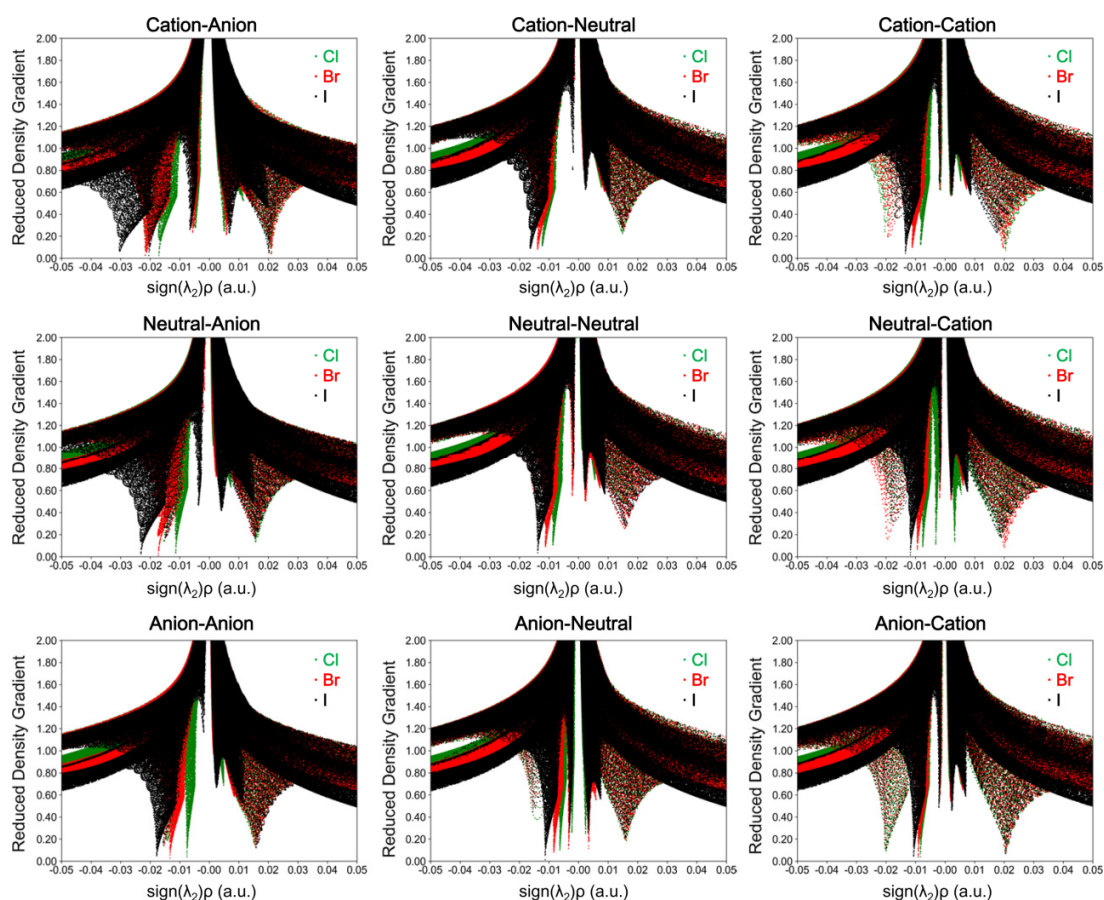

**Figure S3.** Plots of reduced density gradient (RDG) versus the electron density multiplied by the sign of the second eigenvalue of the Hessian matrix ( $\text{sign}(\lambda_2)\rho$ ) for complexes between differently charged 3-amino-5-halobenzoic acid (green for Cl, red for Br, black for I) and glycine in TCM. The peaks with negative  $\text{sign}(\lambda_2)\rho$  and medium RDG value in the figure indicates the existence of attractive non-covalent interactions. For all the systems, the corresponding  $|\text{sign}(\lambda_2)\rho|$  value for the halogen bonding peak (see Figure S4-S5 for discussions on peak attribution) follows the trend of  $\text{I} > \text{Br} > \text{Cl}$ , demonstrating that complexes involving iodine may form the strongest halogen bonding interaction. In general, cation-anion complexes have the largest  $|\text{sign}(\lambda_2)\rho|$  values while anion-cation cases have the smallest, which are in good agreement with the observation from net binding energy ( $E_{\text{bind}_X}$ ) (Table 3, Table S9-S10) and amount of electron transferred (Table S17-S19, Table S20-S22). The narrow peak with negative

$\text{sign}(\lambda_2)\rho$  value might be the peak of the secondary halogen bond that forms between the halogen atom and the other carboxyl oxygen atom in the acceptor (Figure S4).

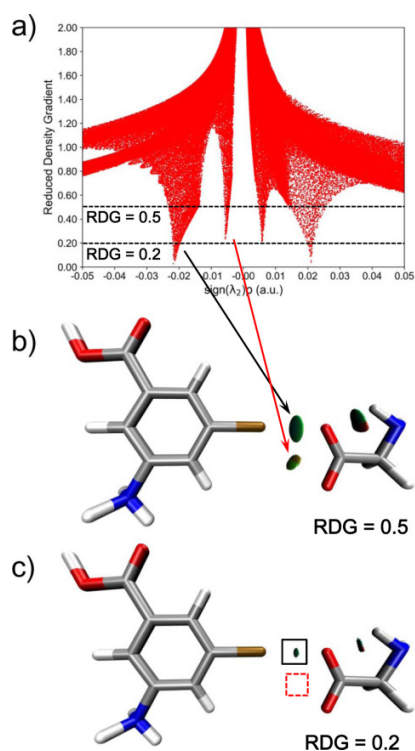

**Figure S4.** (a) Plots of RDG versus  $\text{sign}(\lambda_2)\rho$  for the example system, scatter peaks of the typical and secondary halogen bonds were pointed out by black and red arrows, respectively, associated with (b) the corresponding interaction isosurface for  $\text{RDG} = 0.5$  and  $-0.05 < \text{sign}(\lambda_2)\rho < 0.05$  prepared with VMD.<sup>26</sup> Colors vary from blue, green and red stand respectively for attractive, weak dispersion or van der Waals, and repulsive interactions. (c) Similar with b,  $\text{RDG} = 0.2$ . Interaction isosurface of the typical halogen bond remains (black solid wireframe) while that of secondary halogen bond disappears (red dashed wireframe), which thus attributes the broad peak to halogen bond and the narrow peak to the interaction within the halogen atom and the other carboxyl oxygen atom in the acceptor, or in other words, the secondary halogen bond. Wave function and optimized geometry of the complex between cationic 3-amino-5-bromobenzoic acid donor, and anionic glycine acceptor in TCM was applied for instance, considering the obvious difference of RDG between the corresponding scatter peaks.



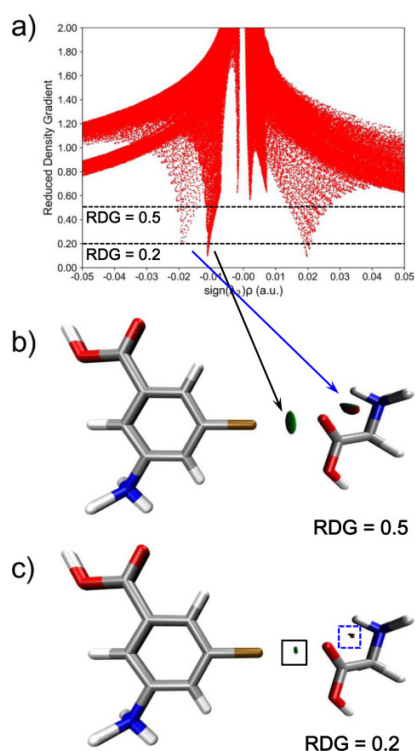

**Figure S5.** (a) Plots of RDG versus  $\text{sign}(\lambda_2)\rho$  for the example system, scatter peaks of intermolecular halogen bond and intramolecular hydrogen bond were pointed out by black and blue arrows, respectively, associated with (b) the corresponding interaction isosurface for  $\text{RDG} = 0.5$  and  $-0.05 < \text{sign}(\lambda_2)\rho < 0.05$  prepared with VMD.<sup>26</sup> Colors vary from blue, green and red stand respectively for attractive, weak dispersion or van der Waals, and repulsive interactions. (c) Similar with b,  $\text{RDG} = 0.2$ . Interaction isosurface of the intermolecular halogen bond remains (black solid wireframe) while that of intramolecular hydrogen bond disappears (blue dashed wireframe, the remaining isosurface colored in red is possibly for the ring critical point), which thus attributes the dark scatter peak with negative  $\lambda_2$  to intermolecular halogen bond and the lightish one intramolecular hydrogen bond. Scatter peaks with positive  $\lambda_2$  probably represent various (3,+1) critical points according to the QTAIM theory,<sup>14</sup> namely, the ring critical points or cage critical points. Wave function and optimized geometry of the complex between cationic 3-amino-5-bromobenzoic acid donor, and cationic glycine acceptor in TCM was applied for instance, considering the obvious difference of RDG between the corresponding scatter peaks. However, not all the NCI scatter diagrams are plotted with the hydrogen bonding peaks, since we

have concentrated the limited probe points to the halogen-bonded region as mentioned above in the computational details.

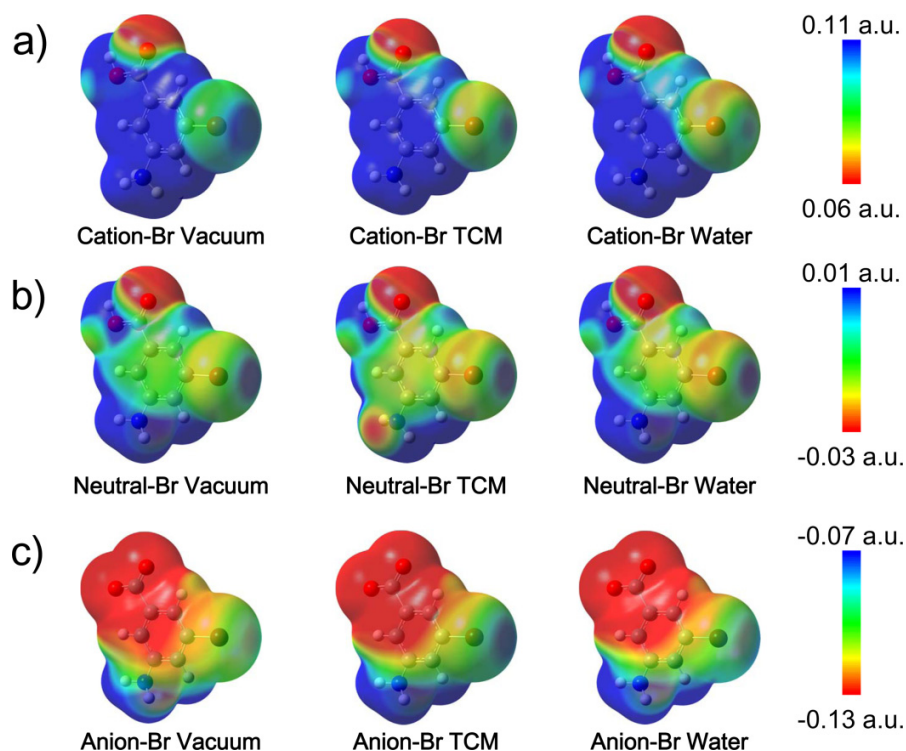

**Figure S6.** Electrostatic potentials (ESPs) mapped on the 0.001 electrons/Bohr<sup>3</sup> isosurface of electronic density for differently charged XB donors represented by the 3-amino-5-bromobenzoic acid in different environments, including (a) cationic XB donor in vacuum (left), TCM (middle) and water (right); (b) neutral XB donor in vacuum (left), TCM (middle) and water (right); (c) anionic XB donor in in vacuum (left), TCM (middle) and water (right). The scales between the maxima and minima of plotted ESP values have been adjusted to visualize the anisotropy of halogen’s electron density more clearly. As a result, a locally less negatively charged region is presented on the halogen atomic surface of all differently charged organobromine donors in different environments. Local electrostatic potential maxima of the halogen atom in XB donors are listed in Table S5. All these evidences suggest the “ $\sigma$ -hole” region (or at least, the local less negatively charged region) exists on halogen atoms in XB donors in all studied systems.

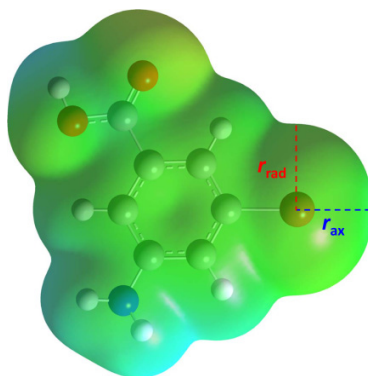

**Figure S7.** The schematic diagram for the axial ( $r_{ax}$ , blue dashed line) and radial distance ( $r_{rad}$ , red dashed line) from the nuclei position of the halogen atom to the molecular surface along axial and radial directions, respectively. The values of  $r_{ax}$  and  $r_{rad}$  and their ratio ( $r_{ax}/r_{rad}$ ) are applied to evaluate the atomic electron density distribution for differently charged XB donors (Table S6-S8). Notably,  $r_{rad}$  is determined by figuring out the probe points with the shortest distance from the nuclei position among all those along the radial direction, rather than simply measuring the points coplanar with the donor ring.

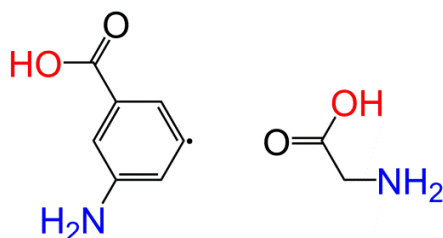

**Figure S8.** Schematic models of the corresponding free radicalized complexes for applied molecules. The halogen atom is replaced with a free radical to maintain the substituent charge of the XB donor. Both of the subunits could be protonated or deprotonated to mimic differently charged systems.

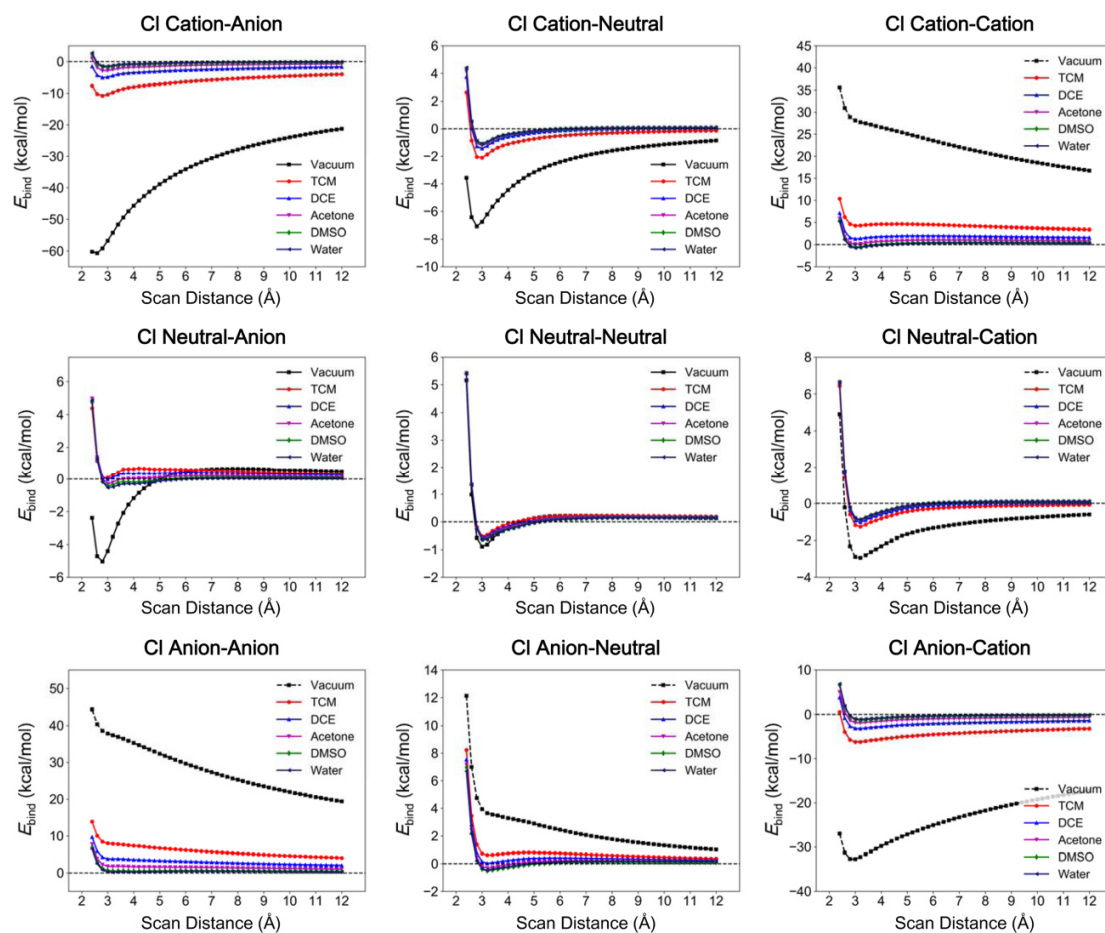

**Figure S9.** Overall binding energy ( $E_{\text{bind}}$ ) versus intermolecular  $\text{Cl}\cdots\text{O}$  distance of complexes between differently charged 3-amino-5-chlorobenzoic acid and glycine in different environments including vacuum (black, those based on optimized structures in TCM are shown in dashed line), TCM (red), DCE (blue), acetone (magenta), DMSO (green), water (midnightblue).

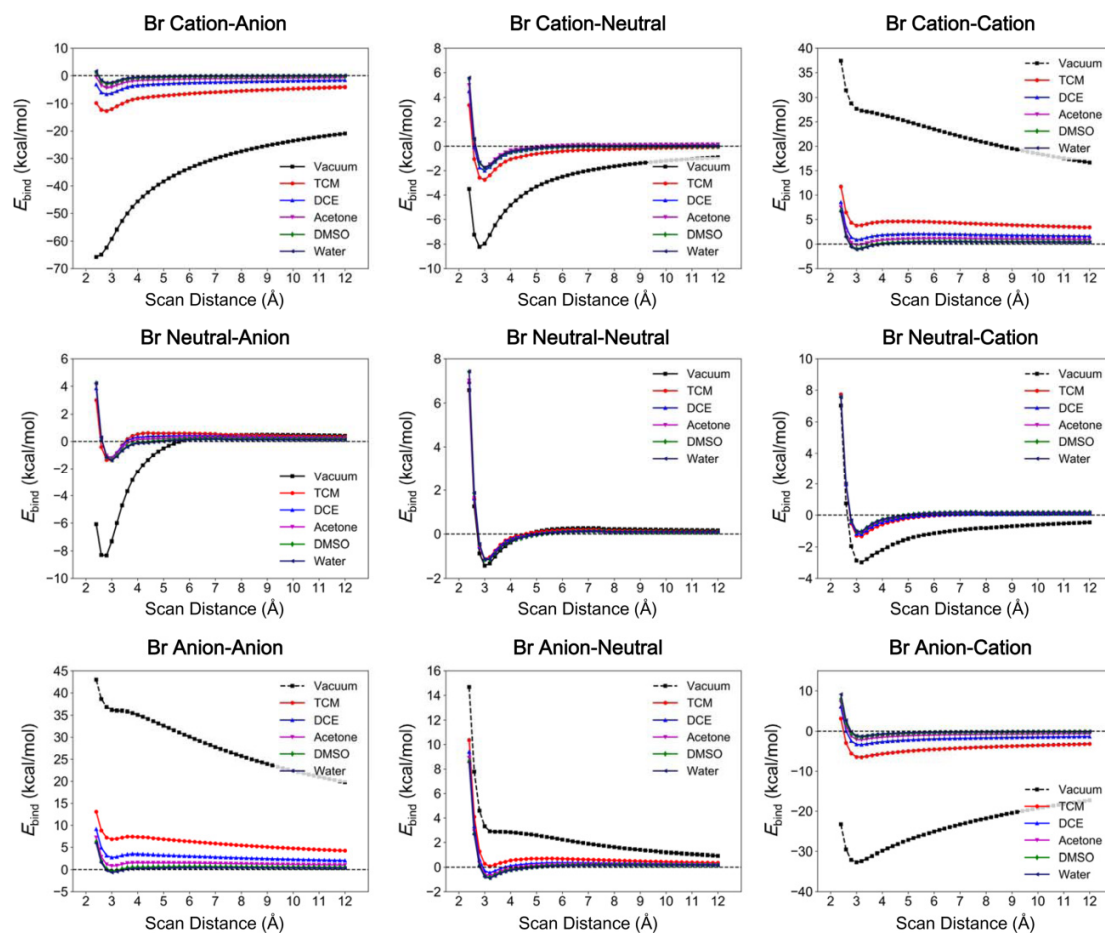

**Figure S10.** Overall binding energy ( $E_{\text{bind}}$ ) versus intermolecular Br $\cdots$ O distance of complexes between differently charged 3-amino-5-bromobenzoic acid and glycine in different environments including vacuum (black, those based on optimized structures in TCM are shown in dashed line), TCM (red), DCE (blue), acetone (magenta), DMSO (green), water (midnightblue).

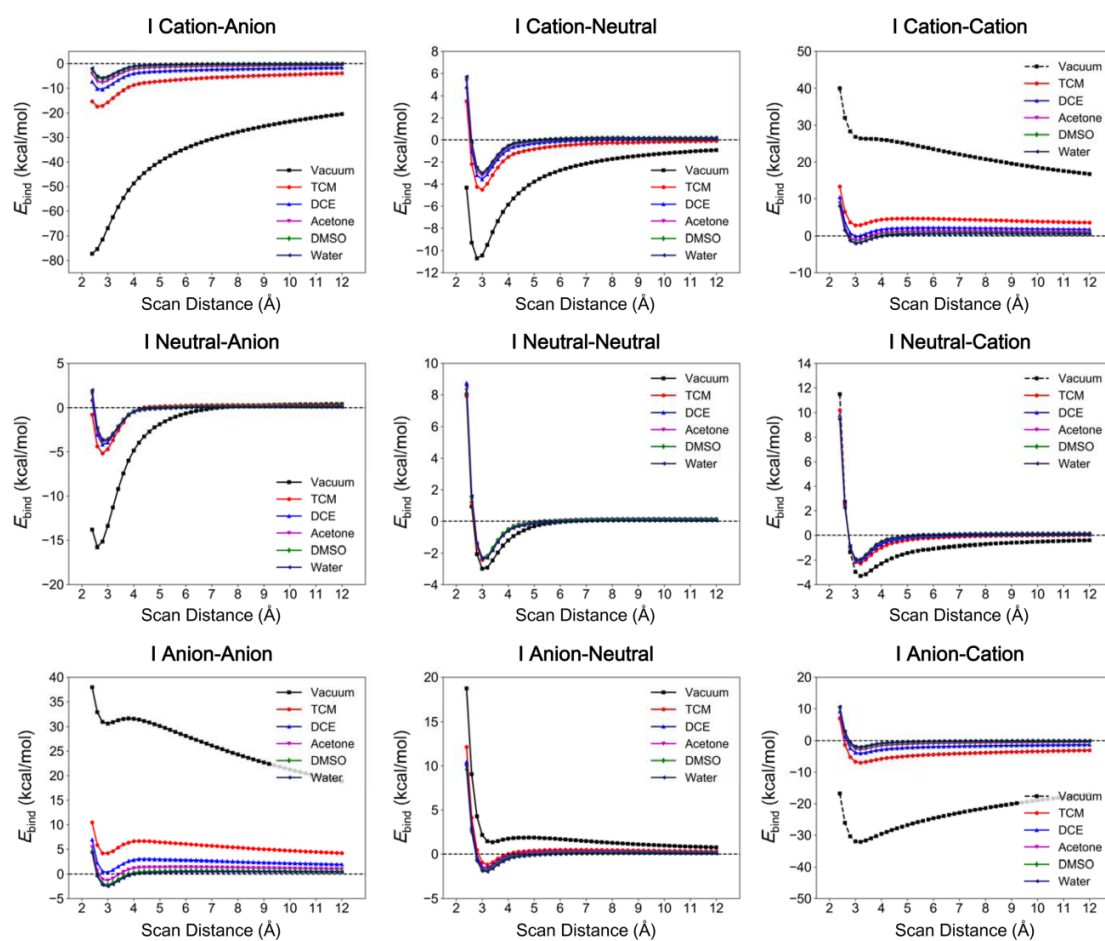

**Figure S11.** Overall binding energy ( $E_{\text{bind}}$ ) versus intermolecular I $\cdots$ O distance of complexes between differently charged 3-amino-5-iodobenzoic acid and glycine in different environments including vacuum (black, those based on optimized structures in TCM are shown in dashed line), TCM (red), DCE (blue), acetone (magenta), DMSO (green), water (midnightblue).

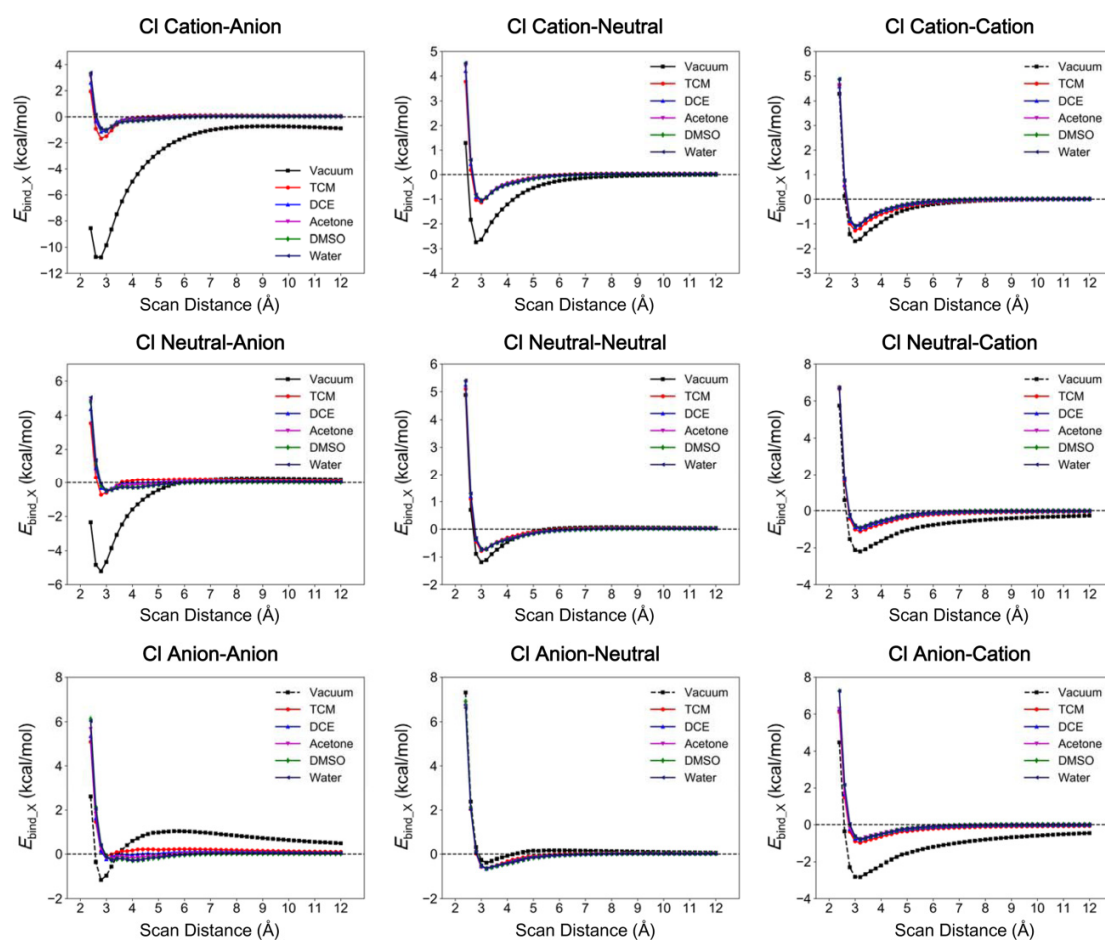

**Figure S12.** Net binding energy ( $E_{\text{bind}_X}$ ) between the Cl atom and acceptor versus intermolecular Cl $\cdots$ O distance of complexes between differently charged 3-amino-5-chlorobenzoic acid and glycine in different environments including vacuum (black, those based on optimized structures in TCM are shown in dashed line), TCM (red), DCE (blue), acetone (magenta), DMSO (green), water (midnightblue).



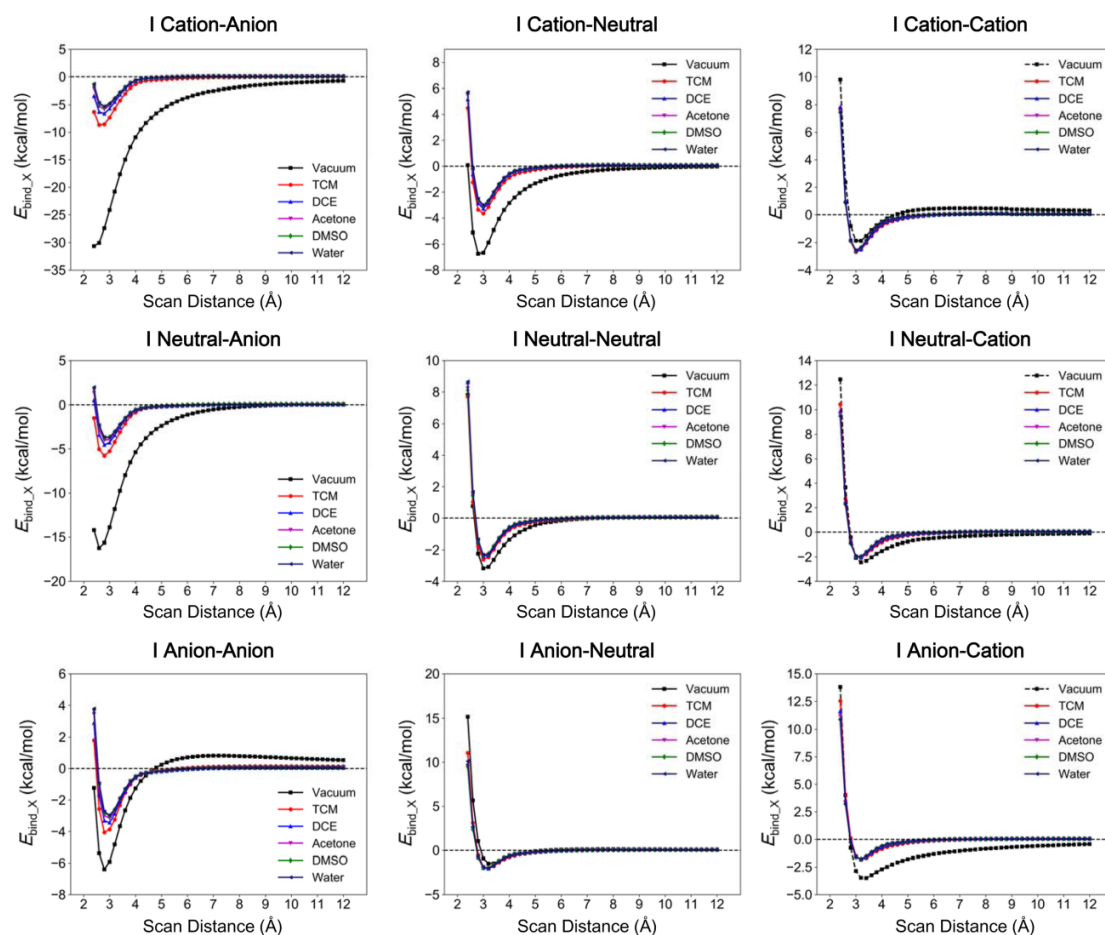

**Figure S13.** Net binding energy between the I atom and acceptor ( $E_{\text{bind},X}$ ) versus intermolecular I...O distance of complexes between differently charged 3-amino-5-iodobenzoic acid and glycine in different environments including vacuum (black, those based on optimized structures in TCM are shown in dashed line), TCM (red), DCE (blue), acetone (magenta), DMSO (green), water (midnightblue).



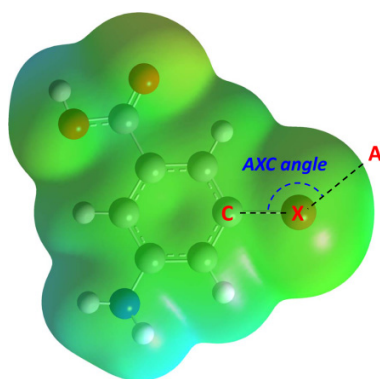

**Figure S14.** The schematic diagram for the *AXC* angle which stands for the angle among the probe point on the molecular surface (*A*), the halogen atom (*X*), and its covalent bonded carbon atom (*C*). The *AXC* angle is designed to describe the relative position of probe points on the halogen atomic surface for the purpose of evaluating the atomic electrostatic potential distribution (Figure S15). Notably, the *AXC* angle is measured for all probe points on the halogen atomic surface rather than simply consider those coplanar with the donor ring.

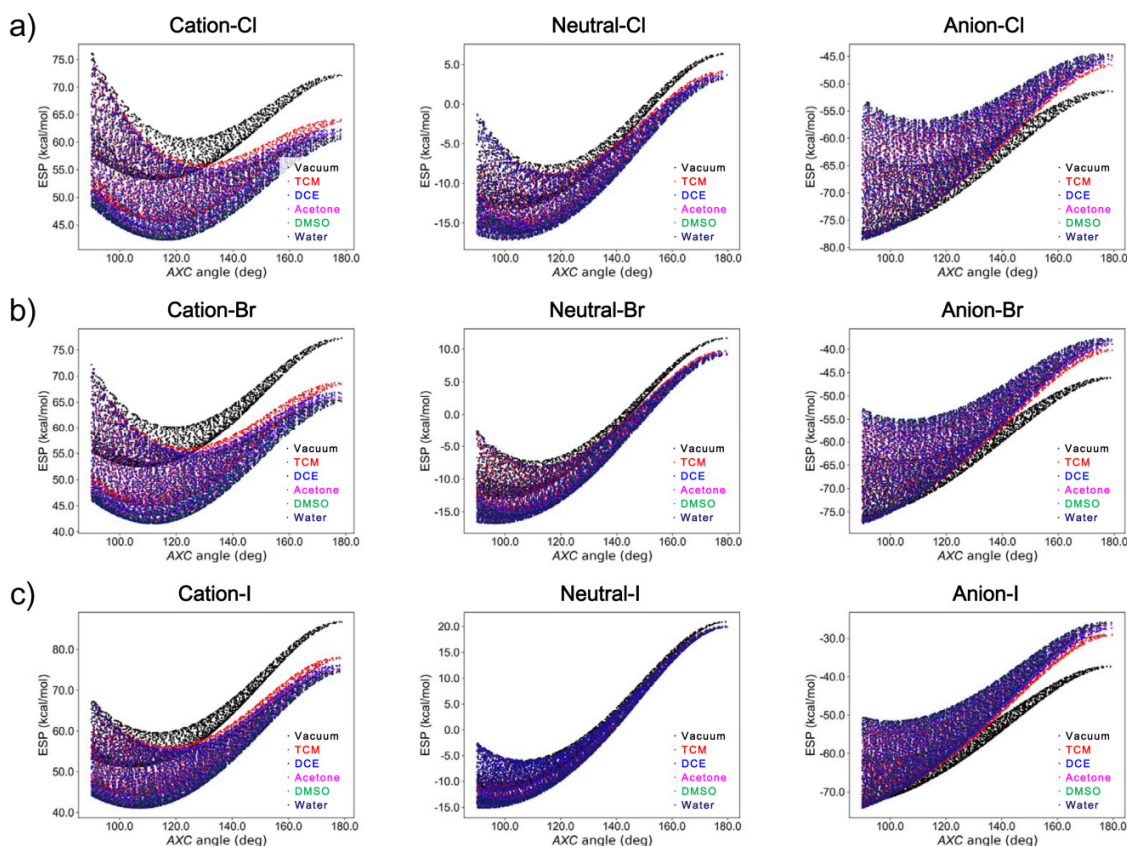

**Figure S15** Scatter diagrams of surface electrostatic potential versus *AXC* angle (Figure S14) of the halogen atom for differently charged (a) 3-amino-5-chlorobenzoic acid, (b) 3-amino-5-bromobenzoic acid and (c) 3-amino-5-iodobenzoic donors in environments including vacuum (black), TCM (red), DCE (blue), acetone (magenta), DMSO (green) and water (midnightblue). The scatter peaks for local surface ESP maxima ( $V_{S,max}$ ) are found for all the cationic, neutral and anionic donors in all dielectric environments, when the *AXC* angle approaches to  $180^\circ$ , suggesting the commonly recognized anisotropic electron density distribution for the halogen atom and the existence of locally electron-depleted region, namely, the  $\sigma$ -hole. These scatter peaks vary with changes in solvent. In general, the absolute values for electrostatic potential of the scatters decrease with the increase of environmental polarity, leading the scatter peaks to move towards zero. For neutral donors, the threshold *AXC* angle around which surface ESPs change from positive to negative, is smaller in less polar environments, indicating that solvents are able to change both size and magnitude of the  $\sigma$ -hole. Similar trends are also observed in Figure S6 and Table S5 as well.

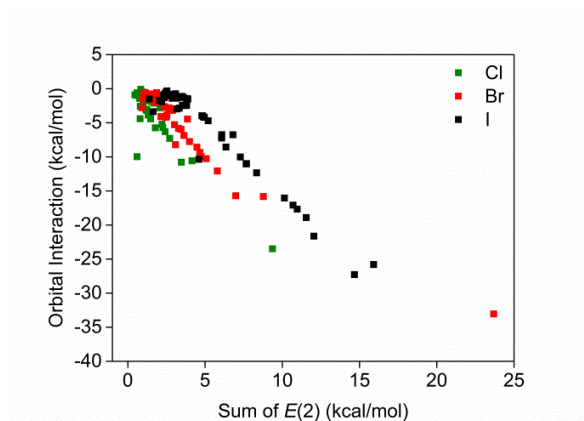

**Figure S16.** Orbital interaction versus the sum of second-order stabilization energy ( $E(2)$ ) for all charge transfers from  $n_O$  and  $n_{O'}$  orbital to the  $\sigma^*_{C-X}$  orbital in all types of complexes between differently charged 3-amino-5-halobenzoic acid (green for Cl, red for Br, black for I) and glycine.

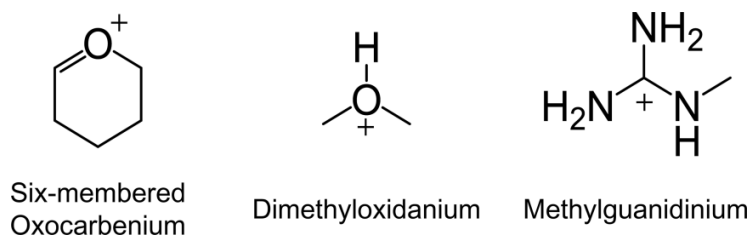

**Figure S17.** Schematic models of the six-membered oxocarbenium (left), dimethyloxidanium (middle) and methylguanidinium (right) cations.

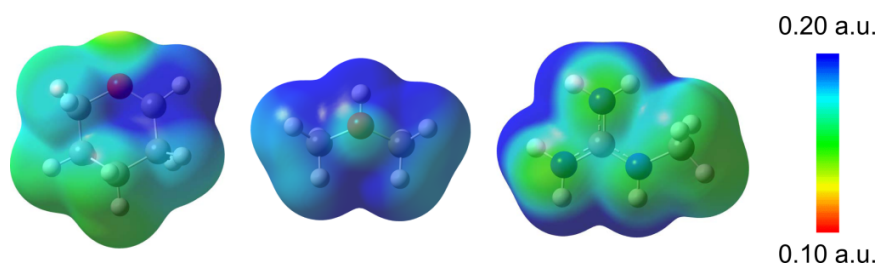

**Figure S18.** Electrostatic potentials (ESPs) mapped on the 0.001 electrons/Bohr<sup>3</sup> isosurface of electron density for the six-membered oxocarbenium (left), dimethyloxidanium (middle) and methylguanidinium (right) cations. ESP values range from 0.10 a.u. (red) to 0.20 a.u. (blue). All the three cationic acceptors have a locally less positively charged region that could form stable halogen bonds with organohalogens.

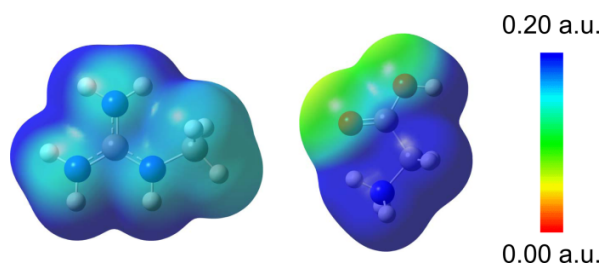

**Figure S19.** Electrostatic potentials (ESPs) mapped on the 0.001 electrons/Bohr<sup>3</sup> isosurface of electron density for cationic methylguanidinium (left) and cationic glycine (right) molecule. ESP values range from 0.00 a.u. (red) to 0.20 a.u. (blue). Surface electrostatic potential of the acceptor nitrogen that connecting the methyl group in the methylguanidinium cation is more positive than that of the carboxyl oxygen atom in the cationic glycine, which thus resulting in more repulsive electrostatic terms in halogen bonds.

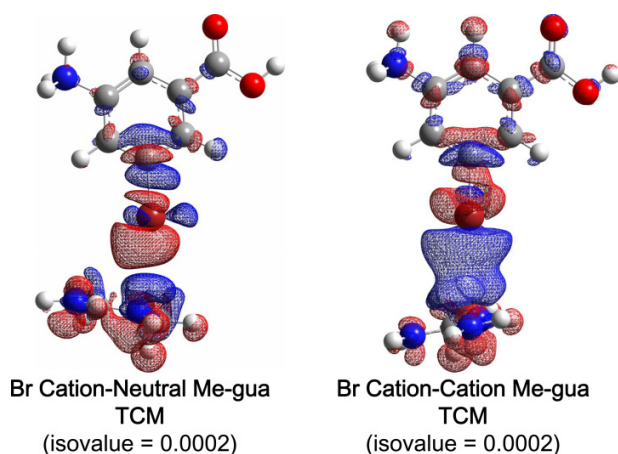

**Figure S20.** Electron density difference maps for complexes of the cationic 3-amino-5-bromobenzoic acid donor, and neutral (left) and cationic (right) methylguanidine acceptors. Electron transfer from the electron density decreases regions (red) to increased regions (blue). The corresponding isovalues are listed below the EDD maps. Intramolecular charge redistribution took place from the Br atom to the rest of the XB donor in cation-neutral complex while from the rest of XB donor to the Br atom in cation-cation complex, similar with that mentioned in manuscript, but based on optimized geometries without imaginary frequencies.

### 3. Tables

**Table S1. Optimized halogen bonding interaction angles in complexes between differently charged 3-amino-5-halobenzoic acid and glycine.<sup>a</sup>**

| Environments | Cation-Anion       |                    |       | Cation-Neutral     |                    |                    | Cation-Cation      |                    |                    |
|--------------|--------------------|--------------------|-------|--------------------|--------------------|--------------------|--------------------|--------------------|--------------------|
|              | Cl                 | Br                 | I     | Cl                 | Br                 | I                  | Cl                 | Br                 | I                  |
| Vacuum       | 178.3 <sup>b</sup> | 179.9 <sup>b</sup> | 179.1 | 178.8              | 176.7              | 177.5              | 174.2 <sup>c</sup> | 175.0 <sup>c</sup> | 177.0 <sup>c</sup> |
| TCM          | 178.7 <sup>b</sup> | 178.8              | 176.6 | 177.0              | 176.0              | 176.9              | 174.2              | 175.0              | 177.0              |
| DCE          | 176.9              | 176.3              | 176.0 | 175.6              | 175.4              | 176.5              | 176.0              | 175.5              | 176.2              |
| Acetone      | 176.5              | 177.0              | 175.6 | 175.1              | 175.0              | 176.2              | 175.9              | 175.2              | 176.6              |
| DMSO         | 176.3              | 176.2              | 175.5 | 174.8              | 174.4              | 175.9              | 174.4              | 174.9              | 176.5              |
| Water        | 176.3              | 175.9              | 175.5 | 174.7              | 174.3              | 175.8              | 174.3              | 174.9              | 176.5              |
| Environments | Neutral-Anion      |                    |       | Neutral-Neutral    |                    |                    | Neutral-Cation     |                    |                    |
|              | Cl                 | Br                 | I     | Cl                 | Br                 | I                  | Cl                 | Br                 | I                  |
| Vacuum       | 178.7 <sup>b</sup> | 178.5              | 176.6 | 175.5 <sup>b</sup> | 176.7 <sup>b</sup> | 177.2              | 173.3 <sup>c</sup> | 173.9 <sup>c</sup> | 176.2 <sup>c</sup> |
| TCM          | 179.1              | 176.2              | 176.4 | 176.3              | 174.8              | 176.7              | 173.3              | 173.9              | 176.2              |
| DCE          | 175.4              | 175.9              | 176.7 | 176.3              | 174.7              | 176.6              | 174.1              | 174.7              | 176.5              |
| Acetone      | 175.6              | 175.8              | 176.8 | 176.3              | 174.6              | 175.8              | 174.6              | 174.3              | 176.6              |
| DMSO         | 177.0              | 176.6              | 176.6 | 176.4              | 175.4              | 177.1              | 174.7              | 174.7              | 176.7              |
| Water        | 175.8              | 176.0              | 177.0 | 176.4              | 175.2              | 176.3              | 174.8              | 174.7              | 176.7              |
| Environments | Anion-Anion        |                    |       | Anion-Neutral      |                    |                    | Anion-Cation       |                    |                    |
|              | Cl                 | Br                 | I     | Cl                 | Br                 | I                  | Cl                 | Br                 | I                  |
| Vacuum       | 173.3 <sup>c</sup> | 176.8 <sup>c</sup> | 178.5 | 177.4 <sup>c</sup> | 176.5 <sup>c</sup> | 175.6 <sup>b</sup> | 175.6 <sup>c</sup> | 173.6 <sup>c</sup> | 175.2 <sup>c</sup> |
| TCM          | 173.3              | 176.8              | 177.7 | 177.4 <sup>b</sup> | 176.5 <sup>b</sup> | 178.3              | 175.6 <sup>b</sup> | 173.6              | 175.2              |
| DCE          | 177.8              | 178.2              | 177.7 | 176.8              | 176.9 <sup>b</sup> | 176.8              | 173.9              | 174.6              | 175.9              |
| Acetone      | 177.7              | 177.7              | 177.5 | 175.7              | 177.0              | 177.7              | 174.2              | 174.9              | 176.1              |
| DMSO         | 177.3              | 177.5              | 177.4 | 175.2              | 176.4              | 177.5              | 174.6              | 175.8              | 176.1              |

Water 176.6 177.4 177.3 176.0 176.2 176.8 174.6 175.9 176.3

<sup>a</sup>All values are in degree. <sup>b</sup>The complex geometry is obtained by constrained optimization. <sup>c</sup>The complex geometry is the optimized structure in TCM.

**Table S2. Electronic properties at the bond critical points for complexes between differently charged 3-amino-5-chlorobenzoic acid and glycine.<sup>a</sup>**

| Complex          | Environment         | $\rho^b$ | $\nabla^2\rho^c$ | $H^d$  | $V^e$   | $G^f$  | $ V /G$ | $ \lambda_1/\lambda_3 ^g$ |
|------------------|---------------------|----------|------------------|--------|---------|--------|---------|---------------------------|
| Cl Cation-Anion  | Vacuum <sup>h</sup> | 0.0290   | 0.1087           | 0.0019 | -0.0234 | 0.0253 | 0.9242  | 0.1680                    |
|                  | TCM <sup>h</sup>    | 0.0171   | 0.0644           | 0.0014 | -0.0133 | 0.0147 | 0.9039  | 0.1509                    |
|                  | DCE                 | 0.0148   | 0.0570           | 0.0014 | -0.0114 | 0.0128 | 0.8896  | 0.1441                    |
|                  | Acetone             | 0.0139   | 0.0534           | 0.0014 | -0.0106 | 0.0120 | 0.8862  | 0.1427                    |
|                  | DMSO                | 0.0135   | 0.0516           | 0.0013 | -0.0102 | 0.0116 | 0.8836  | 0.1416                    |
|                  | Water               | 0.0133   | 0.0508           | 0.0013 | -0.0100 | 0.0114 | 0.8829  | 0.1413                    |
| Cl Neutral-Anion | Vacuum <sup>h</sup> | 0.0182   | 0.0685           | 0.0015 | -0.0141 | 0.0156 | 0.9050  | 0.1537                    |
|                  | TCM                 | 0.0114   | 0.0436           | 0.0013 | -0.0084 | 0.0096 | 0.8702  | 0.1391                    |
|                  | DCE                 | 0.0105   | 0.0400           | 0.0012 | -0.0076 | 0.0088 | 0.8670  | 0.1389                    |
|                  | Acetone             | 0.0099   | 0.0373           | 0.0011 | -0.0071 | 0.0082 | 0.8622  | 0.1379                    |
|                  | DMSO                | 0.0099   | 0.0379           | 0.0012 | -0.0071 | 0.0083 | 0.8600  | 0.1361                    |
|                  | Water               | 0.0093   | 0.0351           | 0.0011 | -0.0066 | 0.0077 | 0.8568  | 0.1369                    |
| Cl Anion-Anion   | Vacuum <sup>i</sup> | 0.0073   | 0.0298           | 0.0012 | -0.0051 | 0.0063 | 0.8107  | 0.1273                    |
|                  | TCM                 | 0.0076   | 0.0302           | 0.0011 | -0.0053 | 0.0064 | 0.8216  | 0.1283                    |
|                  | DCE                 | 0.0095   | 0.0362           | 0.0011 | -0.0068 | 0.0079 | 0.8567  | 0.1363                    |
|                  | Acetone             | 0.0093   | 0.0350           | 0.0011 | -0.0065 | 0.0076 | 0.8549  | 0.1358                    |
|                  | DMSO                | 0.0078   | 0.0293           | 0.0010 | -0.0053 | 0.0063 | 0.8372  | 0.1336                    |
|                  | Water               | 0.0083   | 0.0312           | 0.0011 | -0.0057 | 0.0068 | 0.8439  | 0.1342                    |

|                    |                     |        |        |        |         |        |        |        |
|--------------------|---------------------|--------|--------|--------|---------|--------|--------|--------|
| Cl Cation-Neutral  | Vacuum              | 0.0141 | 0.0606 | 0.0020 | -0.0111 | 0.0131 | 0.8462 | 0.1356 |
|                    | TCM                 | 0.0123 | 0.0506 | 0.0016 | -0.0094 | 0.0110 | 0.8510 | 0.1361 |
|                    | DCE                 | 0.0116 | 0.0468 | 0.0015 | -0.0087 | 0.0102 | 0.8519 | 0.1368 |
|                    | Acetone             | 0.0110 | 0.0444 | 0.0014 | -0.0082 | 0.0097 | 0.8502 | 0.1365 |
|                    | DMSO                | 0.0107 | 0.0427 | 0.0014 | -0.0079 | 0.0093 | 0.8484 | 0.1361 |
|                    | Water               | 0.0106 | 0.0427 | 0.0014 | -0.0079 | 0.0093 | 0.8485 | 0.1361 |
| Cl Neutral-Neutral | Vacuum <sup>h</sup> | 0.0089 | 0.0363 | 0.0013 | -0.0064 | 0.0078 | 0.8283 | 0.1334 |
|                    | TCM                 | 0.0087 | 0.0355 | 0.0013 | -0.0063 | 0.0076 | 0.8268 | 0.1315 |
|                    | DCE                 | 0.0086 | 0.0349 | 0.0013 | -0.0061 | 0.0074 | 0.8271 | 0.1314 |
|                    | Acetone             | 0.0086 | 0.0345 | 0.0013 | -0.0061 | 0.0074 | 0.8273 | 0.1313 |
|                    | DMSO                | 0.0085 | 0.0342 | 0.0013 | -0.0060 | 0.0073 | 0.8270 | 0.1312 |
|                    | Water               | 0.0084 | 0.0340 | 0.0013 | -0.0060 | 0.0072 | 0.8266 | 0.1311 |
| Cl Anion-Neutral   | Vacuum <sup>i</sup> | 0.0062 | 0.0254 | 0.0011 | -0.0042 | 0.0052 | 0.7918 | 0.1265 |
|                    | TCM <sup>h</sup>    | 0.0064 | 0.0256 | 0.0011 | -0.0043 | 0.0053 | 0.7997 | 0.1282 |
|                    | DCE                 | 0.0067 | 0.0266 | 0.0011 | -0.0045 | 0.0056 | 0.8072 | 0.1295 |
|                    | Acetone             | 0.0070 | 0.0278 | 0.0011 | -0.0048 | 0.0059 | 0.8145 | 0.1308 |
|                    | DMSO                | 0.0073 | 0.0287 | 0.0011 | -0.0050 | 0.0061 | 0.8196 | 0.1317 |
|                    | Water               | 0.0076 | 0.0301 | 0.0011 | -0.0053 | 0.0064 | 0.8233 | 0.1320 |
| Cl Cation-Cation   | Vacuum <sup>i</sup> | 0.0080 | 0.0339 | 0.0013 | -0.0058 | 0.0071 | 0.8135 | 0.1316 |
|                    | TCM                 | 0.0083 | 0.0342 | 0.0013 | -0.0060 | 0.0073 | 0.8225 | 0.1327 |
|                    | DCE                 | 0.0091 | 0.0376 | 0.0014 | -0.0067 | 0.0080 | 0.8294 | 0.1330 |
|                    | Acetone             | 0.0093 | 0.0382 | 0.0014 | -0.0068 | 0.0082 | 0.8319 | 0.1333 |
|                    | DMSO                | 0.0093 | 0.0380 | 0.0013 | -0.0068 | 0.0082 | 0.8356 | 0.1346 |
|                    | Water               | 0.0094 | 0.0381 | 0.0013 | -0.0068 | 0.0082 | 0.8362 | 0.1347 |
| Cl Neutral-Cation  | Vacuum <sup>i</sup> | 0.0074 | 0.0305 | 0.0012 | -0.0052 | 0.0064 | 0.8118 | 0.1303 |



|                 |                     |        |        |        |         |        |        |        |
|-----------------|---------------------|--------|--------|--------|---------|--------|--------|--------|
| Cl Anion-Cation | TCM                 | 0.0076 | 0.0307 | 0.0012 | -0.0053 | 0.0065 | 0.8203 | 0.1320 |
|                 | DCE                 | 0.0077 | 0.0308 | 0.0012 | -0.0054 | 0.0066 | 0.8234 | 0.1324 |
|                 | Acetone             | 0.0078 | 0.0311 | 0.0012 | -0.0055 | 0.0066 | 0.8252 | 0.1327 |
|                 | DMSO                | 0.0078 | 0.0312 | 0.0012 | -0.0055 | 0.0066 | 0.8261 | 0.1328 |
|                 | Water               | 0.0078 | 0.0312 | 0.0012 | -0.0055 | 0.0066 | 0.8264 | 0.1328 |
|                 | Vacuum <sup>i</sup> | 0.0082 | 0.0343 | 0.0014 | -0.0059 | 0.0072 | 0.8125 | 0.1297 |
|                 | TCM <sup>h</sup>    | 0.0084 | 0.0343 | 0.0013 | -0.0060 | 0.0073 | 0.8220 | 0.1312 |
|                 | DCE                 | 0.0080 | 0.0325 | 0.0012 | -0.0056 | 0.0069 | 0.8198 | 0.1312 |
|                 | Acetone             | 0.0078 | 0.0318 | 0.0012 | -0.0055 | 0.0067 | 0.8184 | 0.1309 |
|                 | DMSO                | 0.0073 | 0.0292 | 0.0011 | -0.0051 | 0.0062 | 0.8185 | 0.1314 |
|                 | Water               | 0.0073 | 0.0291 | 0.0011 | -0.0050 | 0.0062 | 0.8184 | 0.1314 |

<sup>a</sup>All values are given in atomic units except  $|V|/G$  and  $|\lambda_1|/\lambda_3$ , which are dimensionless. <sup>b</sup>Electron density. <sup>c</sup>Laplacian of electron density. <sup>d</sup>Total energy density. <sup>e</sup>Potential energy density. <sup>f</sup>Kinetic energy density. <sup>g</sup>Ratio of the absolute value of the first eigenvalue of the Hessian matrix and the corresponding third eigenvalue. <sup>h</sup>Results from constrained optimizations. <sup>i</sup>Results from single-point energy calculations using the TCM-optimized geometries. Electronic properties at the bond critical points (BCP), e.g., the positive total energy density ( $H$ ) and Laplacian of electron density ( $\nabla^2\rho$ ) values, and smaller the ratio of  $|\lambda_1|/\lambda_3$  than 1, classify these interactions as closed shell.<sup>27</sup>

**Table S3. Electronic properties at the bond critical points for complexes between differently charged 3-amino-5-bromobenzoic acid and glycine.<sup>a</sup>**

| Complex         | Environment         | $\rho^b$ | $\nabla^2\rho^c$ | $H^d$   | $V^e$   | $G^f$  | $ V /G$ | $ \lambda_1 /\lambda_3^g$ |
|-----------------|---------------------|----------|------------------|---------|---------|--------|---------|---------------------------|
| Br Cation-Anion | Vacuum <sup>h</sup> | 0.0420   | 0.1310           | -0.0004 | -0.0336 | 0.0332 | 1.0128  | 0.1953                    |
|                 | TCM                 | 0.0212   | 0.0743           | 0.0013  | -0.0159 | 0.0172 | 0.9232  | 0.1584                    |
|                 | DCE                 | 0.0193   | 0.0687           | 0.0014  | -0.0144 | 0.0158 | 0.9125  | 0.1519                    |

|                    |                     |        |        |        |         |        |        |        |
|--------------------|---------------------|--------|--------|--------|---------|--------|--------|--------|
| Br Neutral-Anion   | Acetone             | 0.0180 | 0.0645 | 0.0014 | -0.0133 | 0.0147 | 0.9054 | 0.1484 |
|                    | DMSO                | 0.0171 | 0.0614 | 0.0014 | -0.0126 | 0.0140 | 0.9025 | 0.1469 |
|                    | Water               | 0.0168 | 0.0606 | 0.0014 | -0.0124 | 0.0138 | 0.8990 | 0.1455 |
|                    | Vacuum              | 0.0236 | 0.0821 | 0.0014 | -0.0178 | 0.0191 | 0.9281 | 0.1627 |
|                    | TCM                 | 0.0173 | 0.0617 | 0.0014 | -0.0127 | 0.0141 | 0.9034 | 0.1479 |
|                    | DCE                 | 0.0160 | 0.0567 | 0.0013 | -0.0116 | 0.0129 | 0.9018 | 0.1469 |
|                    | Acetone             | 0.0151 | 0.0540 | 0.0013 | -0.0110 | 0.0122 | 0.8965 | 0.1443 |
|                    | DMSO                | 0.0142 | 0.0508 | 0.0013 | -0.0102 | 0.0114 | 0.8904 | 0.1430 |
|                    | Water               | 0.0147 | 0.0524 | 0.0012 | -0.0106 | 0.0119 | 0.8950 | 0.1433 |
|                    | Vacuum <sup>i</sup> | 0.0130 | 0.0469 | 0.0013 | -0.0092 | 0.0105 | 0.8783 | 0.1439 |
| Br Anion-Anion     | TCM                 | 0.0134 | 0.0476 | 0.0012 | -0.0095 | 0.0107 | 0.8865 | 0.1430 |
|                    | DCE                 | 0.0109 | 0.0379 | 0.0010 | -0.0074 | 0.0084 | 0.8780 | 0.1407 |
|                    | Acetone             | 0.0119 | 0.0416 | 0.0011 | -0.0083 | 0.0093 | 0.8855 | 0.1421 |
|                    | DMSO                | 0.0121 | 0.0422 | 0.0011 | -0.0084 | 0.0095 | 0.8866 | 0.1420 |
|                    | Water               | 0.0122 | 0.0426 | 0.0011 | -0.0085 | 0.0096 | 0.8870 | 0.1420 |
|                    | Vacuum              | 0.0162 | 0.0632 | 0.0019 | -0.0121 | 0.0139 | 0.8654 | 0.1410 |
|                    | TCM                 | 0.0139 | 0.0531 | 0.0016 | -0.0101 | 0.0117 | 0.8641 | 0.1392 |
| Br Cation-Neutral  | DCE                 | 0.0135 | 0.0511 | 0.0015 | -0.0097 | 0.0113 | 0.8654 | 0.1393 |
|                    | Acetone             | 0.0133 | 0.0500 | 0.0015 | -0.0096 | 0.0110 | 0.8660 | 0.1394 |
|                    | DMSO                | 0.0126 | 0.0465 | 0.0013 | -0.0089 | 0.0103 | 0.8703 | 0.1415 |
|                    | Water               | 0.0125 | 0.0461 | 0.0013 | -0.0089 | 0.0102 | 0.8703 | 0.1415 |
|                    | Vacuum <sup>h</sup> | 0.0114 | 0.0436 | 0.0014 | -0.0081 | 0.0095 | 0.8510 | 0.1369 |
|                    | TCM                 | 0.0112 | 0.0418 | 0.0013 | -0.0079 | 0.0092 | 0.8586 | 0.1381 |
|                    | DCE                 | 0.0112 | 0.0416 | 0.0013 | -0.0078 | 0.0091 | 0.8602 | 0.1381 |
| Br Neutral-Neutral | Acetone             | 0.0109 | 0.0401 | 0.0012 | -0.0076 | 0.0088 | 0.8602 | 0.1382 |
|                    | DMSO                | 0.0106 | 0.0384 | 0.0012 | -0.0073 | 0.0084 | 0.8621 | 0.1389 |

|                   |                     |        |        |        |         |        |        |        |
|-------------------|---------------------|--------|--------|--------|---------|--------|--------|--------|
| Br Anion-Neutral  | Water               | 0.0105 | 0.0382 | 0.0012 | -0.0072 | 0.0084 | 0.8621 | 0.1389 |
|                   | Vacuum <sup>i</sup> | 0.0082 | 0.0306 | 0.0011 | -0.0055 | 0.0066 | 0.8370 | 0.1333 |
|                   | TCM <sup>h</sup>    | 0.0084 | 0.0307 | 0.0010 | -0.0056 | 0.0066 | 0.8436 | 0.1350 |
|                   | DCE <sup>h</sup>    | 0.0088 | 0.0321 | 0.0010 | -0.0059 | 0.0070 | 0.8493 | 0.1360 |
|                   | Acetone             | 0.0092 | 0.0332 | 0.0011 | -0.0062 | 0.0072 | 0.8526 | 0.1366 |
|                   | DMSO                | 0.0093 | 0.0335 | 0.0011 | -0.0062 | 0.0073 | 0.8540 | 0.1369 |
|                   | Water               | 0.0093 | 0.0337 | 0.0011 | -0.0063 | 0.0074 | 0.8545 | 0.1370 |
| Br Cation-Cation  | Vacuum <sup>i</sup> | 0.0109 | 0.0424 | 0.0014 | -0.0077 | 0.0092 | 0.8436 | 0.1364 |
|                   | TCM                 | 0.0112 | 0.0426 | 0.0014 | -0.0079 | 0.0093 | 0.8522 | 0.1376 |
|                   | DCE                 | 0.0119 | 0.0455 | 0.0014 | -0.0085 | 0.0099 | 0.8559 | 0.1377 |
|                   | Acetone             | 0.0117 | 0.0443 | 0.0014 | -0.0083 | 0.0097 | 0.8581 | 0.1384 |
|                   | DMSO                | 0.0118 | 0.0446 | 0.0014 | -0.0084 | 0.0098 | 0.8592 | 0.1386 |
|                   | Water               | 0.0119 | 0.0449 | 0.0014 | -0.0085 | 0.0098 | 0.8599 | 0.1387 |
|                   | Vacuum <sup>i</sup> | 0.0093 | 0.0358 | 0.0013 | -0.0064 | 0.0077 | 0.8348 | 0.1332 |
| Br Neutral-Cation | TCM                 | 0.0095 | 0.0357 | 0.0012 | -0.0065 | 0.0077 | 0.8430 | 0.1350 |
|                   | DCE                 | 0.0096 | 0.0360 | 0.0012 | -0.0066 | 0.0078 | 0.8450 | 0.1352 |
|                   | Acetone             | 0.0100 | 0.0375 | 0.0012 | -0.0069 | 0.0081 | 0.8495 | 0.1360 |
|                   | DMSO                | 0.0103 | 0.0385 | 0.0012 | -0.0071 | 0.0084 | 0.8517 | 0.1362 |
|                   | Water               | 0.0103 | 0.0386 | 0.0012 | -0.0072 | 0.0084 | 0.8519 | 0.1362 |
|                   | Vacuum <sup>i</sup> | 0.0091 | 0.0348 | 0.0012 | -0.0062 | 0.0075 | 0.8350 | 0.1324 |
|                   | TCM                 | 0.0091 | 0.0344 | 0.0012 | -0.0062 | 0.0074 | 0.8412 | 0.1341 |
| Br Anion-Cation   | DCE                 | 0.0090 | 0.0339 | 0.0012 | -0.0062 | 0.0073 | 0.8416 | 0.1340 |
|                   | Acetone             | 0.0091 | 0.0341 | 0.0012 | -0.0062 | 0.0074 | 0.8431 | 0.1342 |
|                   | DMSO                | 0.0088 | 0.0327 | 0.0011 | -0.0059 | 0.0071 | 0.8421 | 0.1343 |
|                   | Water               | 0.0086 | 0.0314 | 0.0011 | -0.0057 | 0.0068 | 0.8450 | 0.1350 |

<sup>a</sup>All values are given in atomic units except  $|V|/G$  and  $|\lambda_1/\lambda_3$ , which are dimensionless. <sup>b</sup>Electron density.  
S35

<sup>c</sup>Laplacian of electron density. <sup>d</sup>Total energy density. <sup>e</sup>Potential energy density. <sup>f</sup>Kinetic energy density. <sup>g</sup>Ratio of the absolute value of the first eigenvalue of the Hessian matrix and the corresponding third eigenvalue. <sup>h</sup>Results from constrained optimizations. <sup>i</sup>Results from single-point energy calculations using the TCM-optimized geometries. Electronic properties at most of the bond critical points (BCP), e.g., the positive total energy density ( $H$ ) and Laplacian of electron density ( $\nabla^2\rho$ ) values, and smaller the ratio of  $|\lambda_1|/\lambda_3$  than 1, classify these interactions as closed shell,<sup>27</sup> while the cation-anion organobromine complex has revealed more covalent characteristics in vacuum, namely, higher electron density ( $\rho$ ), larger Laplacian value ( $\nabla^2\rho$ ) and negative total energy density ( $H$ ), which is in line with the stronger orbital terms in energy decomposition results as mentioned in the manuscript.

**Table S4. Electronic properties at the bond critical points for complexes between differently charged 3-amino-5-iodobenzoic acid and glycine.<sup>a</sup>**

| Complex         | Environment | $\rho^b$ | $\nabla^2\rho^c$ | $H^d$   | $V^e$   | $G^f$  | $ V /G$ | $ \lambda_1 /\lambda_3^g$ |
|-----------------|-------------|----------|------------------|---------|---------|--------|---------|---------------------------|
| I Cation-Anion  | Vacuum      | 0.0504   | 0.1502           | -0.0061 | -0.0428 | 0.0367 | 1.1673  | 0.1892                    |
|                 | TCM         | 0.0304   | 0.1013           | -0.0006 | -0.0248 | 0.0242 | 1.0244  | 0.1622                    |
|                 | DCE         | 0.0271   | 0.0916           | -0.0001 | -0.0218 | 0.0217 | 1.0024  | 0.1571                    |
|                 | Acetone     | 0.0249   | 0.0848           | 0.0002  | -0.0197 | 0.0200 | 0.9885  | 0.1540                    |
|                 | DMSO        | 0.0242   | 0.0828           | 0.0003  | -0.0191 | 0.0195 | 0.9832  | 0.1524                    |
|                 | Water       | 0.0239   | 0.0820           | 0.0004  | -0.0189 | 0.0192 | 0.9814  | 0.1520                    |
| I Neutral-Anion | Vacuum      | 0.0319   | 0.1052           | -0.0008 | -0.0260 | 0.0252 | 1.0332  | 0.1650                    |
|                 | TCM         | 0.0232   | 0.0796           | 0.0005  | -0.0182 | 0.0186 | 0.9757  | 0.1514                    |
|                 | DCE         | 0.0211   | 0.0726           | 0.0006  | -0.0163 | 0.0169 | 0.9629  | 0.1482                    |
|                 | Acetone     | 0.0200   | 0.0693           | 0.0007  | -0.0153 | 0.0161 | 0.9545  | 0.1456                    |
|                 | DMSO        | 0.0201   | 0.0693           | 0.0007  | -0.0154 | 0.0161 | 0.9574  | 0.1469                    |
|                 | Water       | 0.0194   | 0.0674           | 0.0008  | -0.0148 | 0.0156 | 0.9511  | 0.1448                    |

|                   |                     |        |        |        |         |        |        |        |
|-------------------|---------------------|--------|--------|--------|---------|--------|--------|--------|
| I Anion-Anion     | Vacuum              | 0.0149 | 0.0565 | 0.0014 | -0.0111 | 0.0125 | 0.8907 | 0.1270 |
|                   | TCM                 | 0.0179 | 0.0619 | 0.0009 | -0.0134 | 0.0142 | 0.9398 | 0.1433 |
|                   | DCE                 | 0.0177 | 0.0612 | 0.0008 | -0.0132 | 0.0141 | 0.9395 | 0.1429 |
|                   | Acetone             | 0.0176 | 0.0610 | 0.0008 | -0.0132 | 0.0140 | 0.9398 | 0.1428 |
|                   | DMSO                | 0.0176 | 0.0611 | 0.0008 | -0.0132 | 0.0141 | 0.9398 | 0.1426 |
|                   | Water               | 0.0176 | 0.0611 | 0.0008 | -0.0132 | 0.0140 | 0.9397 | 0.1425 |
| I Cation-Neutral  | Vacuum              | 0.0188 | 0.0704 | 0.0013 | -0.0145 | 0.0158 | 0.9188 | 0.1389 |
|                   | TCM                 | 0.0164 | 0.0606 | 0.0013 | -0.0123 | 0.0135 | 0.9068 | 0.1371 |
|                   | DCE                 | 0.0160 | 0.0589 | 0.0012 | -0.0119 | 0.0131 | 0.9060 | 0.1371 |
|                   | Acetone             | 0.0158 | 0.0580 | 0.0012 | -0.0117 | 0.0130 | 0.9059 | 0.1372 |
|                   | DMSO                | 0.0157 | 0.0575 | 0.0012 | -0.0116 | 0.0128 | 0.9056 | 0.1371 |
|                   | Water               | 0.0157 | 0.0573 | 0.0012 | -0.0116 | 0.0128 | 0.9052 | 0.1370 |
| I Neutral-Neutral | Vacuum              | 0.0133 | 0.0492 | 0.0013 | -0.0095 | 0.0108 | 0.8808 | 0.1340 |
|                   | TCM                 | 0.0138 | 0.0508 | 0.0012 | -0.0100 | 0.0112 | 0.8888 | 0.1346 |
|                   | DCE                 | 0.0137 | 0.0494 | 0.0012 | -0.0098 | 0.0110 | 0.8943 | 0.1368 |
|                   | Acetone             | 0.0140 | 0.0505 | 0.0012 | -0.0101 | 0.0112 | 0.8955 | 0.1364 |
|                   | DMSO                | 0.0140 | 0.0506 | 0.0012 | -0.0101 | 0.0112 | 0.8951 | 0.1359 |
|                   | Water               | 0.0137 | 0.0492 | 0.0011 | -0.0098 | 0.0109 | 0.8967 | 0.1371 |
| I Anion-Neutral   | Vacuum <sup>h</sup> | 0.0081 | 0.0285 | 0.0010 | -0.0051 | 0.0061 | 0.8391 | 0.1292 |
|                   | TCM                 | 0.0113 | 0.0402 | 0.0011 | -0.0077 | 0.0088 | 0.8752 | 0.1342 |
|                   | DCE                 | 0.0122 | 0.0436 | 0.0011 | -0.0085 | 0.0096 | 0.8808 | 0.1343 |
|                   | Acetone             | 0.0126 | 0.0452 | 0.0012 | -0.0088 | 0.0100 | 0.8844 | 0.1344 |
|                   | DMSO                | 0.0128 | 0.0458 | 0.0012 | -0.0090 | 0.0101 | 0.8862 | 0.1347 |
|                   | Water               | 0.0125 | 0.0441 | 0.0011 | -0.0087 | 0.0098 | 0.8880 | 0.1361 |
| I Cation-Cation   | Vacuum <sup>i</sup> | 0.0132 | 0.0499 | 0.0013 | -0.0096 | 0.0109 | 0.8764 | 0.1330 |

|                  |                     |        |        |        |         |        |        |        |
|------------------|---------------------|--------|--------|--------|---------|--------|--------|--------|
|                  | TCM                 | 0.0135 | 0.0499 | 0.0013 | -0.0097 | 0.0110 | 0.8842 | 0.1343 |
|                  | DCE                 | 0.0138 | 0.0505 | 0.0012 | -0.0100 | 0.0112 | 0.8902 | 0.1357 |
|                  | Acetone             | 0.0142 | 0.0523 | 0.0013 | -0.0103 | 0.0116 | 0.8912 | 0.1352 |
|                  | DMSO                | 0.0143 | 0.0526 | 0.0013 | -0.0104 | 0.0116 | 0.8922 | 0.1353 |
|                  | Water               | 0.0143 | 0.0526 | 0.0013 | -0.0104 | 0.0116 | 0.8924 | 0.1353 |
|                  | Vacuum <sup>i</sup> | 0.0117 | 0.0437 | 0.0013 | -0.0082 | 0.0095 | 0.8623 | 0.1309 |
| I Neutral-Cation | TCM                 | 0.0118 | 0.0433 | 0.0012 | -0.0082 | 0.0095 | 0.8710 | 0.1325 |
|                  | DCE                 | 0.0123 | 0.0452 | 0.0012 | -0.0087 | 0.0099 | 0.8765 | 0.1332 |
|                  | Acetone             | 0.0126 | 0.0461 | 0.0012 | -0.0089 | 0.0101 | 0.8791 | 0.1335 |
|                  | DMSO                | 0.0127 | 0.0466 | 0.0012 | -0.0090 | 0.0102 | 0.8805 | 0.1337 |
|                  | Water               | 0.0128 | 0.0467 | 0.0012 | -0.0091 | 0.0103 | 0.8809 | 0.1337 |
|                  | Vacuum <sup>i</sup> | 0.0108 | 0.0394 | 0.0012 | -0.0073 | 0.0085 | 0.8569 | 0.1309 |
| I Anion-Cation   | TCM                 | 0.0107 | 0.0387 | 0.0011 | -0.0073 | 0.0084 | 0.8635 | 0.1321 |
|                  | DCE                 | 0.0111 | 0.0403 | 0.0012 | -0.0077 | 0.0088 | 0.8692 | 0.1328 |
|                  | Acetone             | 0.0113 | 0.0410 | 0.0012 | -0.0078 | 0.0090 | 0.8717 | 0.1331 |
|                  | DMSO                | 0.0114 | 0.0411 | 0.0011 | -0.0078 | 0.0090 | 0.8724 | 0.1332 |
|                  | Water               | 0.0115 | 0.0417 | 0.0012 | -0.0080 | 0.0091 | 0.8737 | 0.1334 |

<sup>a</sup>All values are given in atomic units except  $|V|/G$  and  $|\lambda_1|/\lambda_3$ , which are dimensionless. <sup>b</sup>Electron density. <sup>c</sup>Laplacian of electron density. <sup>d</sup>Total energy density. <sup>e</sup>Potential energy density. <sup>f</sup>Kinetic energy density. <sup>g</sup>Ratio of the absolute value of the first eigenvalue of the Hessian matrix and the corresponding third eigenvalue. <sup>h</sup>Results from constrained optimizations. <sup>i</sup>Results from single-point energy calculations using the TCM-optimized geometries. Electronic properties at most of the bond critical points (BCP), e.g., the positive total energy density ( $H$ ) and Laplacian of electron density ( $\nabla^2\rho$ ) values, and smaller the ratio of  $|\lambda_1|/\lambda_3$  than 1, classify these interactions as closed shell,<sup>27</sup> while the cation-anion and neutral-anion organoiodine complex have revealed more covalent characteristics especially in less polar environments, namely, higher electron density ( $\rho$ ), larger Laplacian value ( $\nabla^2\rho$ ) and negative total energy

density ( $H$ ), which is in line with the stronger orbital terms in energy decomposition results as mentioned in the manuscript.

**Table S5. Local surface electrostatic potential maxima ( $V_{S,max}$ ) for differently charged 3-amino-5-halobenzoic acid donors.<sup>a</sup>**

| Charge state of<br>the XB donor | X  | Environment |        |        |         |        |        |
|---------------------------------|----|-------------|--------|--------|---------|--------|--------|
|                                 |    | Vacuum      | TCM    | DCE    | Acetone | DMSO   | Water  |
| Cation                          | Cl | 72.19       | 64.02  | 62.32  | 61.50   | 61.04  | 60.89  |
|                                 | Br | 77.26       | 68.65  | 66.86  | 66.02   | 65.54  | 65.38  |
|                                 | I  | 86.78       | 78.00  | 76.17  | 75.31   | 74.81  | 74.65  |
| Neutral                         | Cl | 6.40        | 4.14   | 3.72   | 3.48    | 3.35   | 3.32   |
|                                 | Br | 11.67       | 9.71   | 9.40   | 9.24    | 9.14   | 9.11   |
|                                 | I  | 20.92       | 20.05  | 19.94  | 19.94   | 19.92  | 19.91  |
| Anion                           | Cl | -51.33      | -46.44 | -45.40 | -44.90  | -44.62 | -44.53 |
|                                 | Br | -46.05      | -40.06 | -38.80 | -38.18  | -37.83 | -37.71 |
|                                 | I  | -37.32      | -29.08 | -27.29 | -26.43  | -25.94 | -25.77 |

<sup>a</sup>All values are in kcal/mol.

**Table S6. The ratios of axial and radial distance ( $r_{ax}/r_{rad}$ ) from the halogen atom to molecular surface for differently charged 3-amino-5-halobenzoic acid donors.<sup>a</sup>**

| Charge state of the XB donor | X  | Environment |        |        |         |        |        |
|------------------------------|----|-------------|--------|--------|---------|--------|--------|
|                              |    | Vacuum      | TCM    | DCE    | Acetone | DMSO   | Water  |
| Cation                       | Cl | 0.8947      | 0.8968 | 0.8970 | 0.8975  | 0.8976 | 0.8976 |
|                              | Br | 0.8925      | 0.8941 | 0.8947 | 0.8944  | 0.8944 | 0.8949 |
|                              | I  | 0.8665      | 0.8686 | 0.8689 | 0.8690  | 0.8694 | 0.8694 |
| Neutral                      | Cl | 0.9020      | 0.9008 | 0.9000 | 0.9005  | 0.9005 | 0.9005 |
|                              | Br | 0.9012      | 0.8989 | 0.8985 | 0.8981  | 0.8981 | 0.8981 |
|                              | I  | 0.8794      | 0.8768 | 0.8757 | 0.8749  | 0.8745 | 0.8745 |
| Anion                        | Cl | 0.9121      | 0.9050 | 0.9036 | 0.9027  | 0.9027 | 0.9022 |
|                              | Br | 0.9126      | 0.9045 | 0.9019 | 0.9015  | 0.9010 | 0.9006 |
|                              | I  | 0.8978      | 0.8837 | 0.8813 | 0.8797  | 0.8789 | 0.8789 |

<sup>a</sup>As shown in the table, the  $r_{ax}/r_{rad}$  values of iodine atoms in differently charged organoiodine donors are obviously much smaller than that of organobromine and organochlorine, reflecting the flatter shape and larger  $\sigma$ -hole region of heavier halogens which may lead to stronger  $\sigma$ -hole interactions and probably less Pauli repulsion.<sup>28</sup> In general, the shape of heavier halogen atoms is always more easily affected by the environmental dielectric constants, especially when the molecule is neutral or negatively charged, indicating that heavier halogens have a stronger ability to modify the corresponding atomic electron distribution for stronger binding strength with changes in solvent and charge state, and thus are better in deformability, which are also suggested by the amount of electron redistributed within the XB donor in the complexes (Table S17-S19 and Table S20-S22). Unsurprisingly,  $r_{ax}/r_{rad}$  values always follow the trend of cationic < neutral < anionic donors in all types of solvents, which is in agreement with the fact that complexes involving cationic organoiodine form the strongest XBs while those involving anionic organochlorine form the weakest. This observation demonstrates that the strong binding energies in charge-assisted complexes with cationic XB donors originate not only from background electrostatic



interaction, but also from the deformation of the halogen atom that may reshape the  $\sigma$ -hole, induced by the positively charged substituent group.

**Table S7. Axial distances ( $r_{ax}$ ) from the halogen atom to the molecular surface for differently charged 3-amino-5-halobenzoic acid donors.<sup>a</sup>**

| Charge state of<br>the XB donor | X  | Environment |       |       |         |       |       |
|---------------------------------|----|-------------|-------|-------|---------|-------|-------|
|                                 |    | Vacuum      | TCM   | DCE   | Acetone | DMSO  | Water |
| Cation                          | Cl | 1.887       | 1.904 | 1.907 | 1.909   | 1.910 | 1.910 |
|                                 | Br | 1.992       | 2.010 | 2.014 | 2.015   | 2.016 | 2.017 |
|                                 | I  | 2.116       | 2.136 | 2.140 | 2.142   | 2.144 | 2.144 |
| Neutral                         | Cl | 1.924       | 1.926 | 1.926 | 1.927   | 1.927 | 1.927 |
|                                 | Br | 2.035       | 2.036 | 2.035 | 2.035   | 2.035 | 2.035 |
|                                 | I  | 2.172       | 2.170 | 2.169 | 2.168   | 2.168 | 2.168 |
| Anion                           | Cl | 1.961       | 1.943 | 1.940 | 1.938   | 1.938 | 1.937 |
|                                 | Br | 2.078       | 2.056 | 2.051 | 2.049   | 2.048 | 2.047 |
|                                 | I  | 2.231       | 2.196 | 2.190 | 2.186   | 2.184 | 2.184 |

<sup>a</sup>All values are in angstrom.

**Table S8. Radial distances ( $r_{\text{rad}}$ ) from the halogen atom to the molecular surface for differently charged 3-amino-5-halobenzoic acid donors.<sup>a</sup>**

| Charge state of<br>the XB donor | X  | Environment |       |       |         |       |       |
|---------------------------------|----|-------------|-------|-------|---------|-------|-------|
|                                 |    | Vacuum      | TCM   | DCE   | Acetone | DMSO  | Water |
| Cation                          | Cl | 2.109       | 2.123 | 2.126 | 2.127   | 2.128 | 2.128 |
|                                 | Br | 2.232       | 2.248 | 2.251 | 2.253   | 2.254 | 2.254 |
|                                 | I  | 2.442       | 2.459 | 2.463 | 2.465   | 2.466 | 2.466 |
| Neutral                         | Cl | 2.133       | 2.138 | 2.140 | 2.140   | 2.140 | 2.140 |
|                                 | Br | 2.258       | 2.265 | 2.265 | 2.266   | 2.266 | 2.266 |
|                                 | I  | 2.470       | 2.475 | 2.477 | 2.478   | 2.479 | 2.479 |
| Anion                           | Cl | 2.150       | 2.147 | 2.147 | 2.147   | 2.147 | 2.147 |
|                                 | Br | 2.277       | 2.273 | 2.274 | 2.273   | 2.273 | 2.273 |
|                                 | I  | 2.485       | 2.485 | 2.485 | 2.485   | 2.485 | 2.485 |

<sup>a</sup>All values are in angstrom.

**Table S9. Net binding energies ( $E_{\text{bind}_X}$ ) between the halogen atom and acceptor for complexes between differently charged 3-amino-5-chlorobenzoic acid and glycine at the optimized distance.<sup>a</sup>**

| Complex            | Environment        |                    |       |         |       |       |
|--------------------|--------------------|--------------------|-------|---------|-------|-------|
|                    | Vacuum             | TCM                | DCE   | Acetone | DMSO  | Water |
| Cl Cation-Anion    | -9.66 <sup>b</sup> | -1.16 <sup>b</sup> | -0.74 | -0.62   | -0.60 | -0.60 |
| Cl Neutral-Anion   | -4.74 <sup>b</sup> | -0.39              | -0.16 | -0.14   | -0.14 | -0.16 |
| Cl Anion-Anion     | -0.34 <sup>c</sup> | 0.17               | 0.08  | 0.08    | 0.05  | 0.04  |
| Cl Cation-Neutral  | -2.23              | -0.70              | -0.60 | -0.58   | -0.57 | -0.57 |
| Cl Neutral-Neutral | -0.70 <sup>b</sup> | -0.40              | -0.37 | -0.36   | -0.36 | -0.36 |
| Cl Anion-Neutral   | -0.01 <sup>c</sup> | -0.32 <sup>b</sup> | -0.30 | -0.28   | -0.27 | -0.27 |
| Cl Cation-Cation   | -1.19 <sup>c</sup> | -0.78              | -0.65 | -0.59   | -0.57 | -0.56 |
| Cl Neutral-Cation  | -1.70 <sup>c</sup> | -0.63              | -0.51 | -0.46   | -0.43 | -0.42 |
| Cl Anion-Cation    | -2.37 <sup>c</sup> | -0.51 <sup>b</sup> | -0.37 | -0.32   | -0.33 | -0.32 |

<sup>a</sup>All values are in kcal/mol. <sup>b</sup>The complex geometry is obtained by constrained optimization. <sup>c</sup>The complex geometry is the optimized structure in TCM.

**Table S10. Net binding energies ( $E_{\text{bind}_X}$ ) between the halogen atom and acceptor for complexes between differently charged 3-amino-5-iodobenzoic acid and glycine at the optimized distance.<sup>a</sup>**

| Complex           | Environment        |       |       |         |       |       |
|-------------------|--------------------|-------|-------|---------|-------|-------|
|                   | Vacuum             | TCM   | DCE   | Acetone | DMSO  | Water |
| I Cation-Anion    | -29.92             | -8.32 | -6.23 | -5.44   | -5.03 | -4.91 |
| I Neutral-Anion   | -15.82             | -5.45 | -4.14 | -3.67   | -3.46 | -3.38 |
| I Anion-Anion     | -5.59              | -3.75 | -3.09 | -2.82   | -2.67 | -2.62 |
| I Cation-Neutral  | -6.29              | -3.26 | -2.89 | -2.73   | -2.65 | -2.62 |
| I Neutral-Neutral | -2.86              | -2.26 | -2.08 | -2.02   | -1.98 | -1.96 |
| I Anion-Neutral   | -1.17 <sup>b</sup> | -1.68 | -1.66 | -1.62   | -1.60 | -1.58 |
| I Cation-Cation   | -1.47 <sup>c</sup> | -2.26 | -2.18 | -2.17   | -2.14 | -2.13 |
| I Neutral-Cation  | -2.01 <sup>c</sup> | -1.72 | -1.68 | -1.65   | -1.63 | -1.62 |
| I Anion-Cation    | -3.05 <sup>c</sup> | -1.42 | -1.38 | -1.35   | -1.34 | -1.33 |

<sup>a</sup>All values are in kcal/mol. <sup>b</sup>The complex geometry is obtained by constrained optimization. <sup>c</sup>The complex geometry is the optimized structure in TCM.

**Table S11. ETS-NOCV based energy decomposition results for complexes between differently charged 3-amino-5-chlorobenzoic acid and glycine.<sup>a</sup>**

| Complex           | Environment         | $E_{\text{elect}}^b$ | $E_{\text{Pauli}}^c$ | $E_{\text{orb}}^d$ | $E_{\text{disp}}^e$ | $E_{\text{solv}}^f$ | $E_{\text{bind}}^g$ |
|-------------------|---------------------|----------------------|----------------------|--------------------|---------------------|---------------------|---------------------|
| Cl Cation-Anion   | Vacuum <sup>h</sup> | -65.84               | 23.21                | -23.50             | -1.39               | -                   | -67.52              |
|                   | TCM <sup>h</sup>    | -52.65               | 8.15                 | -10.80             | -1.03               | 42.81               | -13.52              |
|                   | DCE                 | -48.54               | 5.85                 | -7.30              | -0.86               | 48.39               | -2.46               |
|                   | Acetone             | -47.63               | 5.17                 | -6.31              | -0.83               | 49.53               | -0.07               |
|                   | DMSO                | -47.10               | 4.83                 | -5.70              | -0.81               | 50.05               | 1.27                |
|                   | Water               | -46.68               | 4.68                 | -5.21              | -0.80               | 49.17               | 1.16                |
| Cl Neutral-Anion  | Vacuum <sup>h</sup> | -4.28                | 9.43                 | -10.59             | -1.07               | -                   | -6.51               |
|                   | TCM                 | -0.14                | 3.54                 | -5.74              | -0.76               | 4.34                | 1.24                |
|                   | DCE                 | 0.79                 | 3.06                 | -4.43              | -0.75               | 3.54                | 2.21                |
|                   | Acetone             | 1.16                 | 2.70                 | -3.88              | -0.73               | 3.14                | 2.39                |
|                   | DMSO                | 1.29                 | 2.68                 | -3.57              | -0.70               | 2.74                | 2.44                |
|                   | Water               | 1.55                 | 2.39                 | -3.03              | -0.72               | 1.63                | 1.82                |
| Cl Anion-Anion    | Vacuum <sup>i</sup> | 40.96                | 1.48                 | -4.41              | -0.61               | -                   | 37.42               |
|                   | TCM                 | 38.47                | 1.54                 | -2.58              | -0.61               | -24.42              | 12.40               |
|                   | DCE                 | 39.41                | 2.52                 | -3.18              | -0.71               | -32.14              | 5.90                |
|                   | Acetone             | 39.49                | 2.38                 | -3.05              | -0.70               | -33.81              | 4.31                |
|                   | DMSO                | 39.81                | 1.73                 | -2.76              | -0.67               | -34.67              | 3.44                |
|                   | Water               | 39.78                | 1.91                 | -2.35              | -0.67               | -36.35              | 2.32                |
| Cl Cation-Neutral | Vacuum              | -7.68                | 4.44                 | -2.82              | -0.83               | -                   | -6.89               |
|                   | TCM                 | -7.43                | 3.57                 | -2.13              | -0.82               | 5.00                | -1.81               |
|                   | DCE                 | -7.07                | 3.24                 | -1.92              | -0.83               | 6.03                | -0.55               |
|                   | Acetone             | -6.84                | 2.97                 | -1.79              | -0.82               | 6.21                | -0.27               |
|                   | DMSO                | -6.68                | 2.77                 | -1.67              | -0.81               | 6.28                | -0.11               |

|                    |                     |       |      |       |       |        |       |
|--------------------|---------------------|-------|------|-------|-------|--------|-------|
|                    | Water               | -6.60 | 2.76 | -1.59 | -0.81 | 6.09   | -0.15 |
|                    | Vacuum <sup>h</sup> | -1.11 | 2.05 | -1.09 | -0.84 | -      | -0.99 |
|                    | TCM                 | -0.95 | 1.85 | -1.09 | -0.73 | 0.67   | -0.25 |
| Cl Neutral-Neutral | DCE                 | -0.84 | 1.80 | -1.08 | -0.72 | 0.81   | -0.03 |
|                    | Acetone             | -0.80 | 1.76 | -1.06 | -0.72 | 0.83   | 0.01  |
|                    | DMSO                | -0.76 | 1.73 | -1.04 | -0.71 | 0.84   | 0.06  |
|                    | Water               | -0.72 | 1.71 | -0.91 | -0.71 | 0.59   | -0.04 |
|                    | Vacuum <sup>i</sup> | 3.62  | 1.09 | -0.92 | -0.73 | -      | 3.06  |
|                    | TCM <sup>h</sup>    | 3.94  | 1.10 | -0.95 | -0.73 | -2.54  | 0.82  |
| Cl Anion-Neutral   | DCE                 | 4.33  | 1.20 | -0.92 | -0.75 | -3.66  | 0.20  |
|                    | Acetone             | 4.46  | 1.33 | -0.94 | -0.76 | -4.04  | 0.05  |
|                    | DMSO                | 4.49  | 1.44 | -0.92 | -0.77 | -4.30  | -0.06 |
|                    | Water               | 4.35  | 1.52 | -0.84 | -0.75 | -4.44  | -0.16 |
|                    | Vacuum <sup>i</sup> | 29.26 | 1.46 | -1.22 | -0.79 | -      | 28.71 |
|                    | TCM                 | 26.67 | 1.59 | -0.10 | -0.79 | -20.25 | 7.12  |
| Cl Cation-Cation   | DCE                 | 25.57 | 1.91 | -0.50 | -0.79 | -24.19 | 2.00  |
|                    | Acetone             | 25.30 | 1.98 | -0.66 | -0.79 | -25.04 | 0.79  |
|                    | DMSO                | 25.37 | 2.03 | -0.77 | -0.82 | -25.77 | 0.04  |
|                    | Water               | 25.30 | 2.05 | -0.75 | -0.82 | -26.01 | -0.23 |
|                    | Vacuum <sup>i</sup> | -2.69 | 1.46 | -0.96 | -0.85 | -      | -3.04 |
|                    | TCM                 | -3.04 | 1.55 | -0.63 | -0.85 | 1.60   | -1.37 |
| Cl Neutral-Cation  | DCE                 | -3.13 | 1.60 | -0.65 | -0.86 | 2.14   | -0.90 |
|                    | Acetone             | -3.16 | 1.62 | -0.69 | -0.86 | 2.30   | -0.79 |
|                    | DMSO                | -3.18 | 1.63 | -0.70 | -0.86 | 2.41   | -0.70 |
|                    | Water               | -3.19 | 1.63 | -0.64 | -0.86 | 2.31   | -0.75 |

|                 |                     |        |      |       |       |       |        |
|-----------------|---------------------|--------|------|-------|-------|-------|--------|
| Cl Anion-Cation | Vacuum <sup>i</sup> | -33.26 | 1.65 | -9.99 | -0.76 | -     | -42.36 |
|                 | TCM <sup>h</sup>    | -31.30 | 1.66 | -1.42 | -0.76 | 22.50 | -9.32  |
|                 | DCE                 | -30.60 | 1.50 | -0.92 | -0.76 | 27.25 | -3.53  |
|                 | Acetone             | -30.28 | 1.43 | -0.78 | -0.75 | 28.24 | -2.14  |
|                 | DMSO                | -29.65 | 1.41 | -0.72 | -0.83 | 28.40 | -1.39  |
|                 | Water               | -29.58 | 1.41 | -0.61 | -0.83 | 28.42 | -1.19  |

<sup>a</sup>All values are in kcal/mol. <sup>b</sup>Electrostatic interaction term. <sup>c</sup>Pauli repulsion term. <sup>d</sup>Orbital interaction term. <sup>e</sup>Dispersion term. <sup>f</sup>Solvation energy term. <sup>g</sup>Overall binding energy calculated using ETS-NOCV scheme with ADF program package. <sup>h</sup>Results based on constrained optimizations. <sup>i</sup>Results based on TCM-optimized geometries.

**Table S12. ETS-NOCV based energy decomposition results for complexes between differently charged 3-amino-5-bromobenzoic acid and glycine.<sup>a</sup>**

| Complex          | Environment         | $E_{\text{elect}}^b$ | $E_{\text{Pauli}}^c$ | $E_{\text{orb}}^d$ | $E_{\text{disp}}^e$ | $E_{\text{solv}}^f$ | $E_{\text{bind}}^g$ |
|------------------|---------------------|----------------------|----------------------|--------------------|---------------------|---------------------|---------------------|
| Br Cation-Anion  | Vacuum <sup>h</sup> | -76.22               | 37.61                | -33.06             | -1.45               | -                   | -73.12              |
|                  | TCM                 | -57.79               | 12.29                | -15.72             | -1.20               | 46.67               | -15.75              |
|                  | DCE                 | -53.64               | 9.82                 | -12.07             | -1.07               | 53.34               | -3.62               |
|                  | Acetone             | -51.87               | 8.44                 | -10.28             | -1.02               | 53.85               | -0.88               |
|                  | DMSO                | -51.04               | 7.69                 | -9.36              | -0.99               | 54.45               | 0.75                |
|                  | Water               | -50.06               | 7.34                 | -8.58              | -0.98               | 53.01               | 0.73                |
| Br Neutral-Anion | Vacuum              | -9.28                | 14.97                | -15.84             | -1.22               | -                   | -11.37              |
|                  | TCM                 | -4.90                | 8.07                 | -9.95              | -0.99               | 7.35                | -0.42               |
|                  | DCE                 | -4.00                | 6.95                 | -7.77              | -0.98               | 7.26                | 1.46                |
|                  | Acetone             | -3.40                | 6.20                 | -6.87              | -0.93               | 6.88                | 1.88                |
|                  | DMSO                | -2.77                | 5.38                 | -5.83              | -0.94               | 6.42                | 2.26                |

|                    |                     |       |      |       |       |        |       |
|--------------------|---------------------|-------|------|-------|-------|--------|-------|
|                    | Water               | -3.01 | 5.84 | -5.97 | -0.92 | 5.67   | 1.61  |
|                    | Vacuum <sup>i</sup> | 40.23 | 4.90 | -8.22 | -0.92 | -      | 35.99 |
|                    | TCM                 | 36.51 | 4.95 | -5.29 | -0.92 | -23.83 | 11.42 |
| Br Anion-Anion     | DCE                 | 36.62 | 3.36 | -4.10 | -0.84 | -29.74 | 5.30  |
|                    | Acetone             | 36.09 | 3.98 | -4.19 | -0.88 | -31.23 | 3.77  |
|                    | DMSO                | 35.92 | 4.08 | -4.15 | -0.88 | -32.04 | 2.93  |
|                    | Water               | 35.84 | 4.13 | -3.82 | -0.88 | -33.19 | 2.08  |
|                    | Vacuum              | -9.37 | 6.21 | -4.45 | -1.01 | -      | -8.62 |
|                    | TCM                 | -8.99 | 4.78 | -3.19 | -0.97 | 5.70   | -2.67 |
| Br Cation-Neutral  | DCE                 | -8.96 | 4.57 | -2.92 | -0.97 | 7.07   | -1.21 |
|                    | Acetone             | -8.83 | 4.43 | -2.81 | -0.97 | 7.30   | -0.88 |
|                    | DMSO                | -8.23 | 4.21 | -2.68 | -1.03 | 7.01   | -0.72 |
|                    | Water               | -8.12 | 4.17 | -2.62 | -1.03 | 6.89   | -0.71 |
|                    | Vacuum <sup>h</sup> | -2.42 | 3.45 | -1.94 | -0.94 | -      | -1.85 |
|                    | TCM                 | -2.42 | 3.36 | -1.81 | -0.95 | 0.88   | -0.94 |
| Br Neutral-Neutral | DCE                 | -2.42 | 3.35 | -1.79 | -0.94 | 1.18   | -0.62 |
|                    | Acetone             | -2.29 | 3.17 | -1.73 | -0.94 | 1.21   | -0.58 |
|                    | DMSO                | -2.24 | 3.11 | -1.64 | -0.98 | 1.19   | -0.56 |
|                    | Water               | -2.18 | 3.09 | -1.62 | -0.98 | 1.09   | -0.60 |
|                    | Vacuum <sup>i</sup> | 2.49  | 2.27 | -1.44 | -0.94 | -      | 2.38  |
|                    | TCM <sup>h</sup>    | 2.44  | 2.19 | -1.18 | -0.94 | -2.34  | 0.17  |
| Br Anion-Neutral   | DCE <sup>h</sup>    | 2.40  | 2.36 | -1.15 | -0.94 | -3.00  | -0.33 |
|                    | Acetone             | 2.36  | 2.48 | -1.17 | -0.95 | -3.17  | -0.45 |
|                    | DMSO                | 2.39  | 2.53 | -1.18 | -0.94 | -3.33  | -0.53 |
|                    | Water               | 2.43  | 2.55 | -1.10 | -0.94 | -3.57  | -0.63 |



|                   |                     |        |      |       |       |        |        |
|-------------------|---------------------|--------|------|-------|-------|--------|--------|
| Br Cation-Cation  | Vacuum <sup>i</sup> | 28.31  | 2.82 | -1.95 | -0.97 | -      | 28.21  |
|                   | TCM                 | 25.32  | 3.05 | -0.59 | -0.97 | -20.40 | 6.41   |
|                   | DCE                 | 23.98  | 3.48 | -0.97 | -0.97 | -24.34 | 1.18   |
|                   | Acetone             | 24.09  | 3.39 | -1.07 | -0.99 | -25.48 | -0.06  |
|                   | DMSO                | 23.90  | 3.44 | -1.16 | -0.99 | -25.95 | -0.76  |
|                   | Water               | 23.76  | 3.49 | -1.19 | -0.99 | -26.10 | -1.03  |
| Br Neutral-Cation | Vacuum <sup>i</sup> | -3.42  | 2.17 | -1.29 | -0.92 | -      | -3.46  |
|                   | TCM                 | -3.95  | 2.27 | -0.78 | -0.92 | 1.35   | -2.03  |
|                   | DCE                 | -4.09  | 2.33 | -0.76 | -0.94 | 1.82   | -1.64  |
|                   | Acetone             | -4.37  | 2.54 | -0.78 | -0.93 | 2.01   | -1.53  |
|                   | DMSO                | -4.46  | 2.70 | -0.82 | -0.93 | 2.09   | -1.42  |
|                   | Water               | -4.50  | 2.71 | -0.77 | -0.93 | 2.05   | -1.44  |
| Br Anion-Cation   | Vacuum <sup>i</sup> | -33.81 | 2.29 | -2.79 | -0.89 | -      | -35.20 |
|                   | TCM                 | -31.73 | 2.20 | -1.53 | -0.89 | 22.01  | -9.94  |
|                   | DCE                 | -30.85 | 2.14 | -0.93 | -0.89 | 26.31  | -4.22  |
|                   | Acetone             | -30.53 | 2.16 | -0.77 | -0.89 | 27.15  | -2.88  |
|                   | DMSO                | -31.14 | 2.02 | -0.75 | -0.93 | 28.83  | -1.97  |
|                   | Water               | -29.92 | 2.14 | -0.58 | -0.96 | 27.40  | -1.92  |

<sup>a</sup>All values are in kcal/mol. <sup>b</sup>Electrostatic interaction term. <sup>c</sup>Pauli repulsion term. <sup>d</sup>Orbital interaction term. <sup>e</sup>Dispersion term. <sup>f</sup>Solvation energy term. <sup>g</sup>Overall binding energy calculated using ETS-NOCV scheme with ADF program package. <sup>h</sup>Results based on constrained optimizations. <sup>i</sup>Results based on TCM-optimized geometries.

**Table S13. ETS-NOCV based energy decomposition results for complexes between differently charged 3-amino-5-iodobenzoic acid and glycine.<sup>a</sup>**

| Complex           | Environment | $E_{\text{elect}}^b$ | $E_{\text{Pauli}}^c$ | $E_{\text{orb}}^d$ | $E_{\text{disp}}^e$ | $E_{\text{solv}}^f$ | $E_{\text{bind}}^g$ |
|-------------------|-------------|----------------------|----------------------|--------------------|---------------------|---------------------|---------------------|
| I Cation-Anion    | Vacuum      | -95.09               | 61.48                | -48.33             | -1.63               | -                   | -83.57              |
|                   | TCM         | -71.25               | 27.00                | -27.28             | -1.45               | 51.86               | -21.12              |
|                   | DCE         | -67.10               | 22.03                | -21.64             | -1.40               | 60.72               | -7.39               |
|                   | Acetone     | -64.10               | 18.85                | -18.91             | -1.36               | 61.39               | -4.13               |
|                   | DMSO        | -63.21               | 17.80                | -17.67             | -1.34               | 62.04               | -2.38               |
|                   | Water       | -62.52               | 17.44                | -17.09             | -1.34               | 61.53               | -1.98               |
| I Neutral-Anion   | Vacuum      | -21.92               | 30.04                | -25.81             | -1.44               | -                   | -19.13              |
|                   | TCM         | -14.93               | 16.98                | -16.04             | -1.31               | 10.89               | -4.41               |
|                   | DCE         | -13.26               | 14.12                | -12.35             | -1.28               | 11.62               | -1.15               |
|                   | Acetone     | -12.32               | 12.70                | -11.05             | -1.23               | 11.45               | -0.45               |
|                   | DMSO        | -12.60               | 12.96                | -10.99             | -1.25               | 11.78               | -0.10               |
|                   | Water       | -11.80               | 12.04                | -10.02             | -1.22               | 10.73               | -0.27               |
| I Anion-Anion     | Vacuum      | 35.30                | 7.97                 | -10.36             | -1.04               | -                   | 31.87               |
|                   | TCM         | 29.48                | 10.67                | -8.56              | -1.17               | -21.85              | 8.57                |
|                   | DCE         | 28.08                | 10.35                | -7.24              | -1.17               | -26.86              | 3.16                |
|                   | Acetone     | 27.72                | 10.30                | -7.07              | -1.17               | -27.93              | 1.85                |
|                   | DMSO        | 27.43                | 10.30                | -6.99              | -1.17               | -28.47              | 1.10                |
|                   | Water       | 27.39                | 10.28                | -6.75              | -1.16               | -29.14              | 0.62                |
| I Cation-Neutral  | Vacuum      | -12.76               | 10.12                | -6.76              | -1.24               | -                   | -10.64              |
|                   | TCM         | -12.61               | 8.04                 | -4.71              | -1.20               | 6.71                | -3.77               |
|                   | DCE         | -12.75               | 7.78                 | -4.22              | -1.20               | 8.41                | -1.98               |
|                   | Acetone     | -12.68               | 7.63                 | -4.13              | -1.21               | 8.69                | -1.70               |
|                   | DMSO        | -12.60               | 7.54                 | -3.98              | -1.20               | 8.93                | -1.31               |
|                   | Water       | -12.50               | 7.49                 | -3.97              | -1.20               | 8.97                | -1.21               |
| I Neutral-Neutral | Vacuum      | -4.59                | 5.75                 | -2.86              | -1.15               | -                   | -2.85               |

|                  |                     |        |      |       |       |        |        |
|------------------|---------------------|--------|------|-------|-------|--------|--------|
|                  | TCM                 | -5.59  | 6.10 | -2.48 | -1.14 | 1.50   | -1.61  |
|                  | DCE                 | -5.89  | 6.24 | -2.45 | -1.22 | 2.06   | -1.26  |
|                  | Acetone             | -6.05  | 6.37 | -2.47 | -1.18 | 2.23   | -1.10  |
|                  | DMSO                | -6.16  | 6.32 | -2.34 | -1.17 | 2.27   | -1.08  |
|                  | Water               | -6.00  | 6.28 | -2.39 | -1.21 | 2.28   | -1.04  |
|                  | Vacuum <sup>h</sup> | 1.12   | 2.82 | -1.50 | -1.07 | -      | 1.37   |
| I Anion-Neutral  | TCM                 | -0.50  | 4.56 | -1.33 | -1.16 | -1.94  | -0.37  |
|                  | DCE                 | -0.57  | 5.03 | -1.41 | -1.12 | -2.69  | -0.76  |
|                  | Acetone             | -1.00  | 5.33 | -1.38 | -1.12 | -2.71  | -0.88  |
|                  | DMSO                | -1.12  | 5.47 | -1.41 | -1.13 | -2.76  | -0.95  |
|                  | Water               | -0.96  | 5.41 | -1.38 | -1.17 | -2.87  | -0.97  |
|                  | Vacuum <sup>i</sup> | 26.79  | 5.08 | -2.97 | -1.18 | -      | 27.72  |
| I Cation-Cation  | TCM                 | 23.11  | 5.43 | -1.14 | -1.18 | -20.16 | 6.06   |
|                  | DCE                 | 22.09  | 5.80 | -1.29 | -1.22 | -24.45 | 0.93   |
|                  | Acetone             | 21.26  | 6.07 | -1.45 | -1.20 | -24.98 | -0.30  |
|                  | DMSO                | 20.98  | 6.16 | -1.54 | -1.20 | -25.40 | -1.00  |
|                  | Water               | 20.87  | 6.16 | -1.53 | -1.20 | -25.51 | -1.21  |
|                  | Vacuum <sup>i</sup> | -4.58  | 4.29 | -1.92 | -1.13 | -      | -3.34  |
| I Neutral-Cation | TCM                 | -5.47  | 4.40 | -1.02 | -1.13 | 1.10   | -2.12  |
|                  | DCE                 | -6.05  | 4.82 | -0.86 | -1.14 | 1.49   | -1.74  |
|                  | Acetone             | -6.28  | 5.01 | -0.85 | -1.14 | 1.56   | -1.70  |
|                  | DMSO                | -6.40  | 5.11 | -0.83 | -1.15 | 1.63   | -1.64  |
|                  | Water               | -6.46  | 5.14 | -0.74 | -1.15 | 1.71   | -1.50  |
|                  | Vacuum <sup>i</sup> | -34.62 | 4.20 | -3.38 | -1.10 | -      | -34.90 |
| I Anion-Cation   | TCM                 | -32.31 | 3.88 | -1.68 | -1.10 | 21.39  | -9.82  |
|                  | DCE                 | -31.83 | 4.17 | -0.90 | -1.12 | 25.41  | -4.27  |

|         |        |      |       |       |       |       |
|---------|--------|------|-------|-------|-------|-------|
| Acetone | -31.77 | 4.30 | -0.67 | -1.12 | 26.24 | -3.02 |
| DMSO    | -31.58 | 4.31 | -0.49 | -1.12 | 26.65 | -2.23 |
| Water   | -31.75 | 4.42 | -0.32 | -1.13 | 26.79 | -1.99 |

---

<sup>a</sup>All values are in kcal/mol. <sup>b</sup>Electrostatic interaction term. <sup>c</sup>Pauli repulsion term. <sup>d</sup>Orbital interaction term. <sup>e</sup>Dispersion term. <sup>f</sup>Solvation energy term. <sup>g</sup>Overall binding energy calculated using ETS-NOCV scheme with ADF program package. <sup>h</sup>Results based on constrained optimizations. <sup>i</sup>Results based on TCM-optimized geometries.

**Table S14. Natural bond orbitals and the  $E(2)$  results involved in electron transfer from lone pair electron orbitals of the oxygen atom to  $\sigma^*_{C-X}$  for complexes between differently charged 3-amino-5-chlorobenzoic acid and glycine.**

| Complex         | Environment         | $E(2)_{\text{Sum}}^a$ | $E(2)^b$   | Electron donor orbital <sup>c</sup> | Electron acceptor orbital <sup>d</sup> |
|-----------------|---------------------|-----------------------|------------|-------------------------------------|----------------------------------------|
| Cl Cation-Anion | Vacuum <sup>f</sup> | 9.37                  | 7.50       | 53.LP(2)O7                          | 420.BD*(1)C10-Cl19                     |
|                 |                     |                       | 1.64       | 52.LP(1)O7                          | 420.BD*(1)C10-Cl19                     |
|                 |                     |                       | 0.23       | 56.LP(2)O9 <sup>e</sup>             | 420.BD*(1)C10-Cl19                     |
|                 | TCM <sup>f</sup>    | 3.47                  | 2.48       | 54.LP(2)O7                          | 419.BD*(1)C10-Cl19                     |
|                 |                     |                       | 0.99       | 53.LP(1)O7                          | 419.BD*(1)C10-Cl19                     |
|                 | DCE                 | 2.72                  | 1.72       | 54.LP(2)O7                          | 419.BD*(1)C10-Cl19                     |
|                 |                     |                       | 1.00       | 53.LP(1)O7                          | 419.BD*(1)C10-Cl19                     |
|                 | Acetone             | 2.42                  | 1.53       | 54.LP(2)O7                          | 419.BD*(1)C10-Cl19                     |
|                 |                     |                       | 0.89       | 53.LP(1)O7                          | 419.BD*(1)C10-Cl19                     |
|                 | DMSO                | 2.27                  | 1.41       | 54.LP(2)O7                          | 419.BD*(1)C10-Cl19                     |
|                 |                     |                       | 0.86       | 53.LP(1)O7                          | 419.BD*(1)C10-Cl19                     |
|                 | Water               | 2.22                  | 1.38       | 54.LP(2)O7                          | 419.BD*(1)C10-Cl19                     |
|                 |                     |                       | 0.84       | 53.LP(1)O7                          | 419.BD*(1)C10-Cl19                     |
|                 | Cl Neutral-Anion    | Vacuum <sup>f</sup>   | 4.16       | 3.07                                | 53.LP(2)O7                             |
| 1.04            |                     |                       |            | 52.LP(1)O7                          | 413.BD*(1)C10-Cl19                     |
| 0.05            |                     |                       |            | 56.LP(2)O9 <sup>e</sup>             | 413.BD*(1)C10-Cl19                     |
| TCM             |                     | 1.78                  | 1.06       | 52.LP(2)O7                          | 414.BD*(1)C10-Cl19                     |
|                 |                     |                       | 0.66       | 51.LP(1)O7                          | 414.BD*(1)C10-Cl19                     |
| DCE             |                     | 1.48                  | 0.06       | 53.LP(3)O7                          | 414.BD*(1)C10-Cl19                     |
|                 | 0.95                |                       | 52.LP(2)O7 | 414.BD*(1)C10-Cl19                  |                                        |
|                 |                     |                       | 0.53       | 51.LP(1)O7                          | 414.BD*(1)C10-Cl19                     |

|                   |                     |      |      |            |                    |
|-------------------|---------------------|------|------|------------|--------------------|
|                   | Acetone             | 1.32 | 0.86 | 52.LP(2)O7 | 414.BD*(1)C10-C119 |
|                   |                     |      | 0.46 | 51.LP(1)O7 | 414.BD*(1)C10-C119 |
|                   | DMSO                | 1.34 | 0.82 | 52.LP(2)O7 | 414.BD*(1)C10-C119 |
|                   |                     |      | 0.52 | 51.LP(1)O7 | 414.BD*(1)C10-C119 |
|                   | Water               | 1.23 | 0.78 | 52.LP(2)O7 | 414.BD*(1)C10-C119 |
|                   |                     |      | 0.40 | 51.LP(1)O7 | 414.BD*(1)C10-C119 |
|                   |                     |      | 0.05 | 53.LP(3)O7 | 414.BD*(1)C10-C119 |
|                   |                     |      | 0.39 | 51.LP(1)O7 | 407.BD*(1)C10-C119 |
|                   | Vacuum <sup>g</sup> | 0.80 | 0.25 | 52.LP(2)O7 | 407.BD*(1)C10-C119 |
|                   |                     |      | 0.16 | 53.LP(3)O7 | 407.BD*(1)C10-C119 |
|                   |                     |      | 0.39 | 50.LP(1)O7 | 408.BD*(1)C10-C119 |
|                   | TCM                 | 0.81 | 0.26 | 51.LP(2)O7 | 408.BD*(1)C10-C119 |
|                   |                     |      | 0.16 | 52.LP(3)O7 | 408.BD*(1)C10-C119 |
| Cl Anion-Anion    | DCE                 | 1.22 | 0.77 | 51.LP(2)O7 | 408.BD*(1)C10-C119 |
|                   |                     |      | 0.45 | 50.LP(1)O7 | 408.BD*(1)C10-C119 |
|                   | Acetone             | 1.17 | 0.75 | 51.LP(2)O7 | 408.BD*(1)C10-C119 |
|                   |                     |      | 0.42 | 50.LP(1)O7 | 408.BD*(1)C10-C119 |
|                   | DMSO                | 0.90 | 0.63 | 51.LP(2)O7 | 408.BD*(1)C10-C119 |
|                   |                     |      | 0.27 | 50.LP(1)O7 | 408.BD*(1)C10-C119 |
|                   | Water               | 0.99 | 0.67 | 51.LP(2)O7 | 408.BD*(1)C10-C119 |
|                   |                     |      | 0.32 | 50.LP(1)O7 | 408.BD*(1)C10-C119 |
|                   | Vacuum              | 2.09 | 1.29 | 54.LP(1)O7 | 426.BD*(1)C10-C119 |
|                   |                     |      | 0.80 | 55.LP(2)O7 | 426.BD*(1)C10-C119 |
| Cl Cation-Neutral | TCM                 | 1.71 | 0.90 | 55.LP(2)O7 | 426.BD*(1)C10-C119 |
|                   |                     |      | 0.81 | 54.LP(1)O7 | 426.BD*(1)C10-C119 |
|                   | DCE                 | 1.55 | 0.90 | 55.LP(2)O7 | 426.BD*(1)C10-C119 |

|                    |                     |      |      |            |                    |
|--------------------|---------------------|------|------|------------|--------------------|
|                    |                     |      | 0.65 | 54.LP(1)O7 | 426.BD*(1)C10-C119 |
|                    |                     |      | 0.85 | 55.LP(2)O7 | 426.BD*(1)C10-C119 |
|                    | Acetone             | 1.43 | 0.58 | 54.LP(1)O7 | 426.BD*(1)C10-C119 |
|                    |                     |      | 0.81 | 55.LP(2)O7 | 426.BD*(1)C10-C119 |
|                    | DMSO                | 1.35 | 0.54 | 54.LP(1)O7 | 426.BD*(1)C10-C119 |
|                    |                     |      | 0.81 | 55.LP(2)O7 | 426.BD*(1)C10-C119 |
|                    | Water               | 1.34 | 0.53 | 54.LP(1)O7 | 426.BD*(1)C10-C119 |
|                    |                     |      | 0.51 | 54.LP(2)O7 | 420.BD*(1)C10-C119 |
|                    | Vacuum <sup>f</sup> | 0.85 | 0.34 | 53.LP(1)O7 | 420.BD*(1)C10-C119 |
|                    |                     |      | 0.54 | 54.LP(2)O7 | 420.BD*(1)C10-C119 |
|                    | TCM                 | 0.95 | 0.41 | 53.LP(1)O7 | 420.BD*(1)C10-C119 |
|                    |                     |      | 0.53 | 54.LP(2)O7 | 420.BD*(1)C10-C119 |
|                    | DCE                 | 0.92 | 0.39 | 53.LP(1)O7 | 420.BD*(1)C10-C119 |
| Cl Neutral-Neutral |                     |      | 0.53 | 54.LP(2)O7 | 420.BD*(1)C10-C119 |
|                    | Acetone             | 0.92 | 0.39 | 53.LP(1)O7 | 420.BD*(1)C10-C119 |
|                    |                     |      | 0.52 | 54.LP(2)O7 | 420.BD*(1)C10-C119 |
|                    | DMSO                | 0.90 | 0.38 | 53.LP(1)O7 | 420.BD*(1)C10-C119 |
|                    |                     |      | 0.52 | 54.LP(2)O7 | 420.BD*(1)C10-C119 |
|                    | Water               | 0.90 | 0.38 | 53.LP(1)O7 | 420.BD*(1)C10-C119 |
|                    |                     |      | 0.31 | 53.LP(2)O7 | 414.BD*(1)C10-C119 |
|                    | Vacuum <sup>g</sup> | 0.46 | 0.15 | 52.LP(1)O7 | 414.BD*(1)C10-C119 |
|                    |                     |      | 0.37 | 52.LP(2)O7 | 415.BD*(1)C10-C119 |
|                    | TCM <sup>f</sup>    | 0.53 | 0.16 | 51.LP(1)O7 | 415.BD*(1)C10-C119 |
| Cl Anion-Neutral   |                     |      | 0.40 | 52.LP(2)O7 | 415.BD*(1)C10-C119 |
|                    | DCE                 | 0.57 | 0.17 | 51.LP(1)O7 | 415.BD*(1)C10-C119 |
|                    |                     |      | 0.44 | 52.LP(2)O7 | 415.BD*(1)C10-C119 |
|                    | Acetone             | 0.63 |      |            |                    |

|                   |                     |      |      |            |                    |
|-------------------|---------------------|------|------|------------|--------------------|
|                   |                     |      | 0.19 | 51.LP(1)O7 | 415.BD*(1)C10-C119 |
|                   | DMSO                | 0.67 | 0.47 | 52.LP(2)O7 | 415.BD*(1)C10-C119 |
|                   |                     |      | 0.20 | 51.LP(1)O7 | 415.BD*(1)C10-C119 |
|                   | Water               | 0.74 | 0.50 | 52.LP(2)O7 | 415.BD*(1)C10-C119 |
|                   |                     |      | 0.24 | 51.LP(1)O7 | 415.BD*(1)C10-C119 |
| Cl Cation-Cation  | Vacuum <sup>g</sup> | 0.75 | 0.48 | 55.LP(2)O7 | 433.BD*(1)C10-C119 |
|                   |                     |      | 0.27 | 54.LP(1)O7 | 433.BD*(1)C10-C119 |
|                   | TCM                 | 0.84 | 0.54 | 55.LP(2)O7 | 433.BD*(1)C10-C119 |
|                   |                     |      | 0.30 | 54.LP(1)O7 | 433.BD*(1)C10-C119 |
|                   | DCE                 | 0.98 | 0.58 | 55.LP(2)O7 | 433.BD*(1)C10-C119 |
|                   |                     |      | 0.40 | 54.LP(1)O7 | 433.BD*(1)C10-C119 |
|                   | Acetone             | 1.02 | 0.60 | 55.LP(2)O7 | 433.BD*(1)C10-C119 |
|                   |                     |      | 0.42 | 54.LP(1)O7 | 433.BD*(1)C10-C119 |
|                   | DMSO                | 1.01 | 0.63 | 55.LP(2)O7 | 433.BD*(1)C10-C119 |
|                   |                     |      | 0.38 | 54.LP(1)O7 | 433.BD*(1)C10-C119 |
|                   | Water               | 1.01 | 0.63 | 55.LP(2)O7 | 433.BD*(1)C10-C119 |
|                   |                     |      | 0.38 | 54.LP(1)O7 | 433.BD*(1)C10-C119 |
| Cl Neutral-Cation | Vacuum <sup>g</sup> | 0.53 | 0.37 | 54.LP(2)O7 | 427.BD*(1)C10-C119 |
|                   |                     |      | 0.16 | 53.LP(1)O7 | 427.BD*(1)C10-C119 |
|                   | TCM                 | 0.64 | 0.46 | 54.LP(2)O7 | 427.BD*(1)C10-C119 |
|                   |                     |      | 0.18 | 53.LP(1)O7 | 427.BD*(1)C10-C119 |
|                   | DCE                 | 0.67 | 0.48 | 54.LP(2)O7 | 427.BD*(1)C10-C119 |
|                   |                     |      | 0.19 | 53.LP(1)O7 | 427.BD*(1)C10-C119 |
|                   | Acetone             | 0.70 | 0.50 | 54.LP(2)O7 | 427.BD*(1)C10-C119 |
|                   |                     |      | 0.20 | 53.LP(1)O7 | 427.BD*(1)C10-C119 |
|                   | DMSO                | 0.70 | 0.50 | 54.LP(2)O7 | 427.BD*(1)C10-C119 |
|                   |                     |      |      |            |                    |



|                 |                     |      |      |            |                    |
|-----------------|---------------------|------|------|------------|--------------------|
|                 |                     |      | 0.20 | 53.LP(1)O7 | 427.BD*(1)C10-C119 |
|                 |                     |      | 0.50 | 54.LP(2)O7 | 427.BD*(1)C10-C119 |
|                 | Water               | 0.70 | 0.20 | 53.LP(1)O7 | 427.BD*(1)C10-C119 |
|                 |                     |      | 0.32 | 53.LP(2)O7 | 421.BD*(1)C10-C119 |
|                 | Vacuum <sup>g</sup> | 0.60 | 0.28 | 52.LP(1)O7 | 421.BD*(1)C10-C119 |
|                 |                     |      | 0.44 | 52.LP(2)O7 | 422.BD*(1)C10-C119 |
|                 | TCM <sup>f</sup>    | 0.76 | 0.32 | 51.LP(1)O7 | 422.BD*(1)C10-C119 |
|                 |                     |      | 0.44 | 52.LP(2)O7 | 422.BD*(1)C10-C119 |
|                 | DCE                 | 0.72 | 0.28 | 51.LP(1)O7 | 422.BD*(1)C10-C119 |
| Cl Anion-Cation |                     |      | 0.27 | 51.LP(1)O7 | 422.BD*(1)C10-C119 |
|                 | Acetone             | 0.71 | 0.44 | 52.LP(2)O7 | 422.BD*(1)C10-C119 |
|                 |                     |      | 0.42 | 52.LP(2)O7 | 422.BD*(1)C10-C119 |
|                 | DMSO                | 0.60 | 0.18 | 51.LP(1)O7 | 422.BD*(1)C10-C119 |
|                 |                     |      | 0.42 | 52.LP(2)O7 | 422.BD*(1)C10-C119 |
|                 | Water               | 0.60 | 0.18 | 51.LP(1)O7 | 422.BD*(1)C10-C119 |

<sup>a</sup>Sum of  $b$  in each molecular system. Values are in kcal/mol. <sup>b</sup>The corresponding second-order perturbation stabilization energy for each intermolecular electron transfer. Values are in kcal/mol. <sup>c</sup>The natural bond orbitals that donate electrons. For instance, 53.LP(2)O7, refers to one of the orbitals for lone pair of electrons on the acceptor oxygen atom, where 53 is the serial number of this orbital; LP means lone pair; 2 in the brackets is the serial number of lone pair electron orbital for O7, O stands for oxygen and 7 is the serial number of this oxygen atom in the complex geometry. <sup>d</sup>The natural bond orbitals that accept electrons. Similar with c, BD\* stands for antibonding molecular orbital. <sup>e</sup>The lone pair electron orbital for the other oxygen (O9) in the acceptor's carboxyl group, indicating the existence of the multiple halogen bonding. <sup>f</sup>Results based on constrained optimizations. <sup>g</sup>Results based on TCM-optimized geometries.

**Table S15. Natural bond orbitals and the  $E(2)$  results involved in electron transfer from lone pair electron orbitals of the oxygen atom to  $\sigma^*_{C-X}$  for complexes between differently charged 3-amino-5-bromobenzoic acid and glycine.**

| Complex         | Environment         | $E(2)_{\text{Sum}}^a$ | $E(2)^b$ | Electron donor orbital <sup>c</sup> | Electron acceptor orbital <sup>d</sup> |
|-----------------|---------------------|-----------------------|----------|-------------------------------------|----------------------------------------|
| Br Cation-Anion | Vacuum <sup>f</sup> | 23.69                 | 19.74    | 63.LP(2)O7                          | 437.BD*(1)C10-Br27                     |
|                 |                     |                       | 3.63     | 62.LP(1)O7                          | 437.BD*(1)C10-Br27                     |
|                 |                     |                       | 0.24     | 66.LP(2)O9 <sup>e</sup>             | 437.BD*(1)C10-Br27                     |
|                 |                     |                       | 0.08     | 65.LP(1)O9 <sup>e</sup>             | 437.BD*(1)C10-Br27                     |
|                 | TCM                 | 6.99                  | 4.86     | 63.LP(2)O7                          | 437.BD*(1)C10-Br27                     |
|                 |                     |                       | 1.96     | 62.LP(1)O7                          | 437.BD*(1)C10-Br27                     |
|                 |                     |                       | 0.11     | 64.LP(3)O7                          | 437.BD*(1)C10-Br27                     |
|                 |                     |                       | 0.06     | 66.LP(2)O9 <sup>e</sup>             | 437.BD*(1)C10-Br27                     |
|                 | DCE                 | 5.80                  | 3.86     | 63.LP(2)O7                          | 437.BD*(1)C10-Br27                     |
|                 |                     |                       | 1.94     | 62.LP(1)O7                          | 437.BD*(1)C10-Br27                     |
|                 | Acetone             | 5.08                  | 3.05     | 63.LP(2)O7                          | 437.BD*(1)C10-Br27                     |
|                 |                     |                       | 1.87     | 62.LP(1)O7                          | 437.BD*(1)C10-Br27                     |
|                 |                     |                       | 0.16     | 64.LP(3)O7                          | 437.BD*(1)C10-Br27                     |
|                 | DMSO                | 4.66                  | 2.84     | 63.LP(2)O7                          | 437.BD*(1)C10-Br27                     |
|                 |                     |                       | 1.76     | 62.LP(1)O7                          | 437.BD*(1)C10-Br27                     |
|                 |                     |                       | 0.06     | 64.LP(3)O7                          | 437.BD*(1)C10-Br27                     |
|                 | Water               | 4.48                  | 2.47     | 63.LP(2)O7                          | 437.BD*(1)C10-Br27                     |
|                 |                     |                       | 1.77     | 62.LP(1)O7                          | 437.BD*(1)C10-Br27                     |
|                 |                     |                       | 0.24     | 64.LP(3)O7                          | 437.BD*(1)C10-Br27                     |
|                 | Br Neutral-Anion    | Vacuum                | 8.78     | 6.49                                | 62.LP(2)O7                             |
| 2.22            |                     |                       |          | 61.LP(1)O7                          | 431.BD*(1)C10-Br26                     |

|                |                     |      |      |                         |                    |                    |
|----------------|---------------------|------|------|-------------------------|--------------------|--------------------|
|                |                     |      | 0.07 | 65.LP(2)O9 <sup>e</sup> | 431.BD*(1)C10-Br26 |                    |
| TCM            | 4.74                |      | 3.03 | 62.LP(2)O7              | 431.BD*(1)C10-Br26 |                    |
|                |                     |      | 1.71 | 61.LP(1)O7              | 431.BD*(1)C10-Br26 |                    |
| DCE            | 4.00                |      | 2.48 | 62.LP(2)O7              | 431.BD*(1)C10-Br26 |                    |
|                |                     |      | 1.52 | 61.LP(1)O7              | 431.BD*(1)C10-Br26 |                    |
| Acetone        | 3.64                |      | 2.16 | 62.LP(2)O7              | 431.BD*(1)C10-Br26 |                    |
|                |                     |      | 1.48 | 61.LP(1)O7              | 431.BD*(1)C10-Br26 |                    |
| DMSO           | 3.29                |      | 1.35 | 62.LP(2)O7              | 431.BD*(1)C10-Br26 |                    |
|                |                     |      | 1.33 | 61.LP(1)O7              | 431.BD*(1)C10-Br26 |                    |
|                |                     |      | 0.61 | 63.LP(3)O7              | 431.BD*(1)C10-Br26 |                    |
| Water          | 3.45                |      | 2.03 | 62.LP(2)O7              | 431.BD*(1)C10-Br26 |                    |
|                |                     |      | 1.42 | 61.LP(1)O7              | 431.BD*(1)C10-Br26 |                    |
| Br Anion-Anion | Vacuum <sup>g</sup> |      | 1.25 | 61.LP(2)O7              | 425.BD*(1)C10-Br25 |                    |
|                |                     |      | 1.21 | 60.LP(1)O7              | 425.BD*(1)C10-Br25 |                    |
|                |                     |      | 0.63 | 62.LP(3)O7              | 425.BD*(1)C10-Br25 |                    |
|                | TCM                 | 3.03 |      | 1.23                    | 60.LP(2)O7         | 426.BD*(1)C10-Br25 |
|                |                     |      |      | 1.19                    | 59.LP(1)O7         | 426.BD*(1)C10-Br25 |
|                |                     |      |      | 0.61                    | 61.LP(3)O7         | 426.BD*(1)C10-Br25 |
|                | DCE                 | 2.15 |      | 1.24                    | 60.LP(2)O7         | 426.BD*(1)C10-Br25 |
|                |                     |      |      | 0.84                    | 59.LP(1)O7         | 426.BD*(1)C10-Br25 |
|                |                     |      |      | 0.07                    | 61.LP(3)O7         | 426.BD*(1)C10-Br25 |
|                | Acetone             | 2.46 |      | 1.28                    | 60.LP(2)O7         | 426.BD*(1)C10-Br25 |
|                |                     |      |      | 0.94                    | 59.LP(1)O7         | 426.BD*(1)C10-Br25 |
|                |                     |      |      | 0.24                    | 61.LP(3)O7         | 426.BD*(1)C10-Br25 |
| DMSO           | 2.51                |      | 1.30 | 60.LP(2)O7              | 426.BD*(1)C10-Br25 |                    |
|                |                     |      | 0.96 | 59.LP(1)O7              | 426.BD*(1)C10-Br25 |                    |

|                   |                    |                     |      |            |                    |                    |
|-------------------|--------------------|---------------------|------|------------|--------------------|--------------------|
|                   |                    |                     | 0.25 | 61.LP(3)O7 | 426.BD*(1)C10-Br25 |                    |
|                   |                    |                     | 1.30 | 60.LP(2)O7 | 426.BD*(1)C10-Br25 |                    |
|                   | Water              | 2.54                | 0.98 | 59.LP(1)O7 | 426.BD*(1)C10-Br25 |                    |
|                   |                    |                     | 0.26 | 61.LP(3)O7 | 426.BD*(1)C10-Br25 |                    |
| Br Cation-Neutral | Vacuum             | 3.87                | 1.96 | 63.LP(1)O7 | 444.BD*(1)C10-Br28 |                    |
|                   |                    |                     | 1.91 | 64.LP(2)O7 | 444.BD*(1)C10-Br28 |                    |
|                   | TCM                | 2.89                | 1.52 | 64.LP(2)O7 | 444.BD*(1)C10-Br28 |                    |
|                   |                    |                     | 1.37 | 63.LP(1)O7 | 444.BD*(1)C10-Br28 |                    |
|                   | DCE                | 2.74                | 1.49 | 64.LP(2)O7 | 444.BD*(1)C10-Br28 |                    |
|                   |                    |                     | 1.25 | 63.LP(1)O7 | 444.BD*(1)C10-Br28 |                    |
|                   | Acetone            | 2.65                | 1.46 | 64.LP(2)O7 | 444.BD*(1)C10-Br28 |                    |
|                   |                    |                     | 1.19 | 63.LP(1)O7 | 444.BD*(1)C10-Br28 |                    |
|                   | DMSO               | 2.37                | 1.45 | 64.LP(2)O7 | 444.BD*(1)C10-Br28 |                    |
|                   |                    |                     | 0.92 | 63.LP(1)O7 | 444.BD*(1)C10-Br28 |                    |
|                   | Water              | 2.35                | 1.44 | 64.LP(2)O7 | 444.BD*(1)C10-Br28 |                    |
|                   |                    |                     | 0.91 | 63.LP(1)O7 | 444.BD*(1)C10-Br28 |                    |
|                   | Br Neutral-Neutral | Vacuum <sup>f</sup> | 1.93 | 1.00       | 63.LP(2)O7         | 438.BD*(1)C10-Br27 |
|                   |                    |                     |      | 0.93       | 62.LP(1)O7         | 438.BD*(1)C10-Br27 |
| TCM               |                    | 1.92                | 1.09 | 63.LP(2)O7 | 438.BD*(1)C10-Br27 |                    |
|                   |                    |                     | 0.83 | 62.LP(1)O7 | 438.BD*(1)C10-Br27 |                    |
| DCE               |                    | 1.91                | 1.09 | 63.LP(2)O7 | 438.BD*(1)C10-Br27 |                    |
|                   |                    |                     | 0.82 | 62.LP(1)O7 | 438.BD*(1)C10-Br27 |                    |
| Acetone           |                    | 1.83                | 1.07 | 63.LP(2)O7 | 438.BD*(1)C10-Br27 |                    |
|                   |                    |                     | 0.76 | 62.LP(1)O7 | 438.BD*(1)C10-Br27 |                    |
| DMSO              |                    | 1.71                | 1.05 | 63.LP(2)O7 | 438.BD*(1)C10-Br27 |                    |
|                   |                    |                     | 0.66 | 62.LP(1)O7 | 438.BD*(1)C10-Br27 |                    |

|                  |                     |      |      |            |                    |
|------------------|---------------------|------|------|------------|--------------------|
|                  | Water               | 1.70 | 1.05 | 63.LP(2)O7 | 438.BD*(1)C10-Br27 |
|                  |                     |      | 0.65 | 62.LP(1)O7 | 438.BD*(1)C10-Br27 |
| Br Anion-Neutral | Vacuum <sup>g</sup> | 0.99 | 0.59 | 62.LP(2)O7 | 432.BD*(1)C10-Br26 |
|                  |                     |      | 0.40 | 61.LP(1)O7 | 432.BD*(1)C10-Br26 |
|                  | TCM <sup>f</sup>    | 1.11 | 0.70 | 61.LP(2)O7 | 433.BD*(1)C10-Br26 |
|                  |                     |      | 0.41 | 60.LP(1)O7 | 433.BD*(1)C10-Br26 |
|                  | DCE <sup>f</sup>    | 1.23 | 0.77 | 61.LP(2)O7 | 433.BD*(1)C10-Br26 |
|                  |                     |      | 0.46 | 60.LP(1)O7 | 433.BD*(1)C10-Br26 |
|                  | Acetone             | 1.31 | 0.81 | 61.LP(2)O7 | 433.BD*(1)C10-Br26 |
|                  |                     |      | 0.50 | 60.LP(1)O7 | 433.BD*(1)C10-Br26 |
|                  | DMSO                | 1.35 | 0.84 | 61.LP(2)O7 | 433.BD*(1)C10-Br26 |
|                  |                     |      | 0.51 | 60.LP(1)O7 | 433.BD*(1)C10-Br26 |
|                  | Water               | 1.37 | 0.85 | 61.LP(2)O7 | 433.BD*(1)C10-Br26 |
|                  |                     |      | 0.52 | 60.LP(1)O7 | 433.BD*(1)C10-Br26 |
| Br Cation-Cation | Vacuum <sup>g</sup> | 1.70 | 0.93 | 64.LP(2)O7 | 451.BD*(1)C10-Br29 |
|                  |                     |      | 0.77 | 63.LP(1)O7 | 451.BD*(1)C10-Br29 |
|                  | TCM                 | 1.87 | 1.05 | 64.LP(2)O7 | 451.BD*(1)C10-Br29 |
|                  |                     |      | 0.82 | 63.LP(1)O7 | 451.BD*(1)C10-Br29 |
|                  | DCE                 | 2.08 | 1.13 | 64.LP(2)O7 | 451.BD*(1)C10-Br29 |
|                  |                     |      | 0.95 | 63.LP(1)O7 | 451.BD*(1)C10-Br29 |
|                  | Acetone             | 2.01 | 1.13 | 64.LP(2)O7 | 451.BD*(1)C10-Br29 |
|                  |                     |      | 0.88 | 63.LP(1)O7 | 451.BD*(1)C10-Br29 |
|                  | DMSO                | 2.03 | 1.15 | 64.LP(2)O7 | 451.BD*(1)C10-Br29 |
|                  |                     |      | 0.88 | 63.LP(1)O7 | 451.BD*(1)C10-Br29 |
|                  | Water               | 2.05 | 1.16 | 64.LP(2)O7 | 451.BD*(1)C10-Br29 |
|                  |                     |      | 0.89 | 63.LP(1)O7 | 451.BD*(1)C10-Br29 |

|                   |                     |                     |      |            |                    |                    |
|-------------------|---------------------|---------------------|------|------------|--------------------|--------------------|
| Br Neutral-Cation | Vacuum <sup>g</sup> | 1.09                | 0.57 | 63.LP(2)O7 | 445.BD*(1)C10-Br28 |                    |
|                   |                     |                     | 0.52 | 62.LP(1)O7 | 445.BD*(1)C10-Br28 |                    |
|                   | TCM                 | 1.31                | 0.73 | 63.LP(2)O7 | 445.BD*(1)C10-Br28 |                    |
|                   |                     |                     | 0.58 | 62.LP(1)O7 | 445.BD*(1)C10-Br28 |                    |
|                   | DCE                 | 1.29                | 0.70 | 63.LP(2)O7 | 445.BD*(1)C10-Br28 |                    |
|                   |                     |                     | 0.59 | 62.LP(1)O7 | 445.BD*(1)C10-Br28 |                    |
|                   | Acetone             | 1.49                | 0.84 | 63.LP(2)O7 | 445.BD*(1)C10-Br28 |                    |
|                   |                     |                     | 0.65 | 62.LP(1)O7 | 445.BD*(1)C10-Br28 |                    |
|                   | DMSO                | 1.61                | 0.92 | 63.LP(2)O7 | 445.BD*(1)C10-Br28 |                    |
|                   |                     |                     | 0.69 | 62.LP(1)O7 | 445.BD*(1)C10-Br28 |                    |
|                   | Water               | 1.62                | 0.92 | 63.LP(2)O7 | 445.BD*(1)C10-Br28 |                    |
|                   |                     |                     | 0.70 | 62.LP(1)O7 | 445.BD*(1)C10-Br28 |                    |
|                   | Br Anion-Cation     | Vacuum <sup>g</sup> | 0.92 | 0.48       | 61.LP(1)O7         | 439.BD*(1)C10-Br27 |
|                   |                     |                     |      | 0.44       | 62.LP(2)O7         | 439.BD*(1)C10-Br27 |
| TCM               |                     | 1.16                | 0.62 | 61.LP(2)O7 | 440.BD*(1)C10-Br27 |                    |
|                   |                     |                     | 0.54 | 60.LP(1)O7 | 440.BD*(1)C10-Br27 |                    |
| DCE               |                     | 1.22                | 0.67 | 61.LP(2)O7 | 440.BD*(1)C10-Br27 |                    |
|                   |                     |                     | 0.55 | 60.LP(1)O7 | 440.BD*(1)C10-Br27 |                    |
| Acetone           |                     | 1.26                | 0.70 | 61.LP(2)O7 | 440.BD*(1)C10-Br27 |                    |
|                   |                     |                     | 0.56 | 60.LP(1)O7 | 440.BD*(1)C10-Br27 |                    |
| DMSO              |                     | 1.05                | 0.56 | 61.LP(2)O7 | 440.BD*(1)C10-Br27 |                    |
|                   |                     |                     | 0.49 | 60.LP(1)O7 | 440.BD*(1)C10-Br27 |                    |
| Water             |                     | 1.13                | 0.72 | 61.LP(2)O7 | 440.BD*(1)C10-Br27 |                    |
|                   |                     |                     | 0.41 | 60.LP(1)O7 | 440.BD*(1)C10-Br27 |                    |

<sup>a</sup>Sum of  $b$  in each molecular system. Values are in kcal/mol. <sup>b</sup>The corresponding second-order perturbation stabilization energy for each intermolecular electron transfer. Values are in kcal/mol. <sup>c</sup>The

natural bond orbitals that donate electrons. For instance, 53.LP(2)O7, refers to one of the orbitals for lone pair of electrons on the acceptor oxygen atom, where 53 is the serial number of this orbital; LP means lone pair; 2 in the brackets is the serial number of lone pair electron orbital for O7, O stands for oxygen and 7 is the serial number of this oxygen atom in the complex geometry. <sup>d</sup>The natural bond orbitals that accept electrons. Similar with c, BD\* stands for antibonding molecular orbital. <sup>e</sup>The lone pair electron orbital for the other oxygen (O9) in the acceptor's carboxyl group, indicating the existence of the multiple halogen bonding. <sup>f</sup>Results based on constrained optimizations. <sup>g</sup>Results based on TCM-optimized geometries.

**Table S16. Natural bond orbitals and the  $E(2)$  results involved in electron transfer from lone pair electron orbitals of the oxygen atom to  $\sigma^*_{C-X}$  for complexes between differently charged 3-amino-5-iodobenzoic acid and glycine.**

| Complex        | Environment | $E(2)_{\text{Sum}}^a$ | $E(2)^b$ | Electron donor orbital <sup>c</sup> | Electron acceptor orbital <sup>d</sup> |
|----------------|-------------|-----------------------|----------|-------------------------------------|----------------------------------------|
| I Cation-Anion | Vacuum      | 34.46                 | 27.49    | 48.LP(2)O7                          | 400.BD*(1)C10-I27                      |
|                |             |                       | 6.24     | 47.LP(1)O7                          | 400.BD*(1)C10-I27                      |
|                |             |                       | 0.38     | 51.LP(2)O9 <sup>e</sup>             | 400.BD*(1)C10-I27                      |
|                |             |                       | 0.24     | 50.LP(1)O9 <sup>e</sup>             | 400.BD*(1)C10-I27                      |
|                |             |                       | 0.11     | 49.LP(3)O7                          | 400.BD*(1)C10-I27                      |
|                |             |                       | 10.24    | 49.LP(2)O7                          | 400.BD*(1)C10-I27                      |
|                | TCM         | 14.67                 | 4.13     | 48.LP(1)O7                          | 400.BD*(1)C10-I27                      |
|                |             |                       | 0.18     | 52.LP(2)O9 <sup>e</sup>             | 400.BD*(1)C10-I27                      |
|                |             |                       | 0.12     | 51.LP(1)O9 <sup>e</sup>             | 400.BD*(1)C10-I27                      |
|                |             |                       | 8.07     | 49.LP(2)O7                          | 400.BD*(1)C10-I27                      |
|                | DCE         | 12.05                 | 3.75     | 48.LP(1)O7                          | 400.BD*(1)C10-I27                      |
|                |             |                       | 0.13     | 52.LP(2)O9 <sup>e</sup>             | 400.BD*(1)C10-I27                      |
|                |             |                       | S63      |                                     |                                        |

|                 |       |       |       |                         |                   |
|-----------------|-------|-------|-------|-------------------------|-------------------|
|                 |       |       | 0.10  | 51.LP(1)O9 <sup>e</sup> | 400.BD*(1)C10-I27 |
|                 |       |       | 7.79  | 49.LP(2)O7              | 400.BD*(1)C10-I27 |
|                 |       |       | 3.53  | 48.LP(1)O7              | 400.BD*(1)C10-I27 |
| Acetone         | 11.55 |       | 0.10  | 52.LP(2)O9 <sup>e</sup> | 400.BD*(1)C10-I27 |
|                 |       |       | 0.07  | 50.LP(3)O7              | 400.BD*(1)C10-I27 |
|                 |       |       | 0.06  | 51.LP(1)O9 <sup>e</sup> | 400.BD*(1)C10-I27 |
|                 |       |       | 7.27  | 49.LP(2)O7              | 400.BD*(1)C10-I27 |
|                 |       |       | 3.48  | 48.LP(1)O7              | 400.BD*(1)C10-I27 |
| DMSO            | 10.97 |       | 0.09  | 50.LP(3)O7              | 400.BD*(1)C10-I27 |
|                 |       |       | 0.08  | 52.LP(2)O9 <sup>e</sup> | 400.BD*(1)C10-I27 |
|                 |       |       | 0.05  | 51.LP(1)O9 <sup>e</sup> | 400.BD*(1)C10-I27 |
|                 |       |       | 7.09  | 49.LP(2)O7              | 400.BD*(1)C10-I27 |
|                 |       |       | 3.44  | 48.LP(1)O7              | 400.BD*(1)C10-I27 |
| Water           | 10.70 |       | 0.09  | 50.LP(3)O7              | 400.BD*(1)C10-I27 |
|                 |       |       | 0.08  | 52.LP(2)O9 <sup>e</sup> | 400.BD*(1)C10-I27 |
|                 |       |       | 11.36 | 48.LP(2)O7              | 394.BD*(1)C10-I26 |
|                 |       |       | 4.30  | 47.LP(1)O7              | 394.BD*(1)C10-I26 |
| Vacuum          | 15.91 |       | 0.13  | 51.LP(2)O9 <sup>e</sup> | 394.BD*(1)C10-I26 |
|                 |       |       | 0.12  | 50.LP(1)O9 <sup>e</sup> | 394.BD*(1)C10-I26 |
|                 |       |       | 6.66  | 48.LP(2)O7              | 394.BD*(1)C10-I26 |
|                 |       |       | 3.32  | 47.LP(1)O7              | 394.BD*(1)C10-I26 |
| I Neutral-Anion | TCM   | 10.14 | 0.10  | 49.LP(3)O7              | 394.BD*(1)C10-I26 |
|                 |       |       | 0.06  | 51.LP(2)O9 <sup>e</sup> | 394.BD*(1)C10-I26 |
|                 |       |       | 5.12  | 48.LP(2)O7              | 394.BD*(1)C10-I26 |
|                 |       |       | 3.12  | 47.LP(1)O7              | 394.BD*(1)C10-I26 |
| DCE             | 8.34  |       | 0.10  | 49.LP(3)O7              | 394.BD*(1)C10-I26 |
|                 |       |       | 4.46  | 48.LP(2)O7              | 394.BD*(1)C10-I26 |
| Acetone         | 7.66  |       |       |                         |                   |



|                  |         |      |      |            |                   |
|------------------|---------|------|------|------------|-------------------|
|                  |         |      | 3.03 | 47.LP(1)O7 | 394.BD*(1)C10-I26 |
|                  |         |      | 0.17 | 49.LP(3)O7 | 394.BD*(1)C10-I26 |
|                  |         |      | 4.72 | 48.LP(2)O7 | 394.BD*(1)C10-I26 |
|                  | DMSO    | 7.69 | 2.90 | 47.LP(1)O7 | 394.BD*(1)C10-I26 |
|                  |         |      | 0.07 | 49.LP(3)O7 | 394.BD*(1)C10-I26 |
|                  |         |      | 4.17 | 48.LP(2)O7 | 394.BD*(1)C10-I26 |
|                  | Water   | 7.29 | 2.92 | 47.LP(1)O7 | 394.BD*(1)C10-I26 |
|                  |         |      | 0.20 | 49.LP(3)O7 | 394.BD*(1)C10-I26 |
|                  |         |      | 3.54 | 46.LP(1)O7 | 388.BD*(1)C10-I25 |
|                  | Vacuum  | 4.61 | 0.90 | 47.LP(2)O7 | 388.BD*(1)C10-I25 |
|                  |         |      | 0.17 | 48.LP(3)O7 | 388.BD*(1)C10-I25 |
|                  |         |      | 3.60 | 46.LP(2)O7 | 389.BD*(1)C10-I25 |
|                  | TCM     | 6.36 | 2.67 | 45.LP(1)O7 | 389.BD*(1)C10-I25 |
|                  |         |      | 0.09 | 47.LP(3)O7 | 389.BD*(1)C10-I25 |
|                  |         |      | 3.35 | 46.LP(2)O7 | 389.BD*(1)C10-I25 |
|                  | DCE     | 6.08 | 2.66 | 45.LP(1)O7 | 389.BD*(1)C10-I25 |
|                  |         |      | 0.07 | 47.LP(3)O7 | 389.BD*(1)C10-I25 |
| I Anion-Anion    |         |      | 3.41 | 46.LP(2)O7 | 389.BD*(1)C10-I25 |
|                  | Acetone | 6.07 | 2.61 | 45.LP(1)O7 | 389.BD*(1)C10-I25 |
|                  |         |      | 0.05 | 47.LP(3)O7 | 389.BD*(1)C10-I25 |
|                  |         |      | 3.42 | 46.LP(2)O7 | 389.BD*(1)C10-I25 |
|                  | DMSO    | 6.09 | 2.61 | 45.LP(1)O7 | 389.BD*(1)C10-I25 |
|                  |         |      | 0.06 | 47.LP(3)O7 | 389.BD*(1)C10-I25 |
|                  |         |      | 3.42 | 46.LP(2)O7 | 389.BD*(1)C10-I25 |
|                  | Water   | 6.09 | 2.61 | 45.LP(1)O7 | 389.BD*(1)C10-I25 |
|                  |         |      | 0.06 | 47.LP(3)O7 | 389.BD*(1)C10-I25 |
| I Cation-Neutral | Vacuum  | 6.81 | 3.64 | 49.LP(1)O7 | 407.BD*(1)C10-I28 |

|                   |         |      |      |                         |                         |                   |
|-------------------|---------|------|------|-------------------------|-------------------------|-------------------|
|                   |         |      | 3.17 | 50.LP(2)O7              | 407.BD*(1)C10-I28       |                   |
| TCM               | 5.21    |      | 2.72 | 49.LP(1)O7              | 407.BD*(1)C10-I28       |                   |
|                   |         |      | 2.49 | 50.LP(2)O7              | 407.BD*(1)C10-I28       |                   |
| DCE               | 4.96    |      | 2.53 | 49.LP(1)O7              | 407.BD*(1)C10-I28       |                   |
|                   |         |      | 2.43 | 50.LP(2)O7              | 407.BD*(1)C10-I28       |                   |
| Acetone           | 4.89    |      | 2.43 | 49.LP(1)O7              | 407.BD*(1)C10-I28       |                   |
|                   |         |      | 2.41 | 50.LP(2)O7              | 407.BD*(1)C10-I28       |                   |
|                   |         |      | 0.05 | 51.LP(1)O9 <sup>e</sup> | 407.BD*(1)C10-I28       |                   |
| DMSO              | 4.83    |      | 2.39 | 50.LP(2)O7              | 407.BD*(1)C10-I28       |                   |
|                   |         |      | 2.39 | 49.LP(1)O7              | 407.BD*(1)C10-I28       |                   |
|                   |         |      | 0.05 | 51.LP(1)O9 <sup>e</sup> | 407.BD*(1)C10-I28       |                   |
| Water             | 4.80    |      | 2.38 | 49.LP(1)O7              | 407.BD*(1)C10-I28       |                   |
|                   |         |      | 2.37 | 50.LP(2)O7              | 407.BD*(1)C10-I28       |                   |
|                   |         |      | 0.05 | 51.LP(1)O9 <sup>e</sup> | 407.BD*(1)C10-I28       |                   |
| I Neutral-Neutral | Vacuum  | 3.34 |      | 1.89                    | 48.LP(1)O7              | 401.BD*(1)C10-I27 |
|                   |         |      |      | 1.45                    | 49.LP(2)O7              | 401.BD*(1)C10-I27 |
|                   | TCM     | 3.69 |      | 2.01                    | 48.LP(1)O7              | 401.BD*(1)C10-I27 |
|                   |         |      |      | 1.68                    | 49.LP(2)O7              | 401.BD*(1)C10-I27 |
|                   | DCE     | 3.54 |      | 1.74                    | 49.LP(2)O7              | 401.BD*(1)C10-I27 |
|                   |         |      |      | 1.73                    | 48.LP(1)O7              | 401.BD*(1)C10-I27 |
|                   |         |      |      | 0.07                    | 50.LP(1)O9 <sup>e</sup> | 401.BD*(1)C10-I27 |
|                   | Acetone | 3.80 |      | 1.89                    | 49.LP(2)O7              | 401.BD*(1)C10-I27 |
|                   |         |      |      | 1.85                    | 48.LP(1)O7              | 401.BD*(1)C10-I27 |
|                   |         |      |      | 0.06                    | 50.LP(1)O9 <sup>e</sup> | 401.BD*(1)C10-I27 |
|                   | DMSO    | 3.82 |      | 1.91                    | 48.LP(1)O7              | 401.BD*(1)C10-I27 |
|                   |         |      |      | 1.86                    | 49.LP(2)O7              | 401.BD*(1)C10-I27 |
|                   |         |      | 0.05 | 50.LP(1)O9 <sup>e</sup> | 401.BD*(1)C10-I27       |                   |

|                 |                     |      |      |                         |                   |
|-----------------|---------------------|------|------|-------------------------|-------------------|
|                 |                     |      | 1.89 | 49.LP(2)O7              | 401.BD*(1)C10-I27 |
|                 | Water               | 3.69 | 1.71 | 48.LP(1)O7              | 401.BD*(1)C10-I27 |
|                 |                     |      | 0.09 | 50.LP(1)O9 <sup>e</sup> | 401.BD*(1)C10-I27 |
|                 |                     |      | 0.70 | 48.LP(2)O7              | 395.BD*(1)C10-I26 |
|                 | Vacuum <sup>f</sup> | 1.39 | 0.61 | 47.LP(1)O7              | 395.BD*(1)C10-I26 |
|                 |                     |      | 0.08 | 49.LP(1)O9 <sup>e</sup> | 395.BD*(1)C10-I26 |
|                 |                     |      | 1.21 | 46.LP(1)O7              | 396.BD*(1)C10-I26 |
|                 | TCM                 | 2.38 | 1.11 | 47.LP(2)O7              | 396.BD*(1)C10-I26 |
|                 |                     |      | 0.06 | 48.LP(1)O9 <sup>e</sup> | 396.BD*(1)C10-I26 |
|                 |                     |      | 1.49 | 46.LP(1)O7              | 396.BD*(1)C10-I26 |
| I Anion-Neutral | DCE                 | 2.88 | 1.39 | 47.LP(2)O7              | 396.BD*(1)C10-I26 |
|                 |                     |      | 1.60 | 46.LP(1)O7              | 396.BD*(1)C10-I26 |
|                 | Acetone             | 3.09 | 1.49 | 47.LP(2)O7              | 396.BD*(1)C10-I26 |
|                 |                     |      | 1.63 | 46.LP(1)O7              | 396.BD*(1)C10-I26 |
|                 | DMSO                | 3.17 | 1.54 | 47.LP(2)O7              | 396.BD*(1)C10-I26 |
|                 |                     |      | 1.57 | 47.LP(2)O7              | 396.BD*(1)C10-I26 |
|                 | Water               | 3.07 | 1.42 | 46.LP(1)O7              | 396.BD*(1)C10-I26 |
|                 |                     |      | 0.08 | 48.LP(1)O9 <sup>e</sup> | 396.BD*(1)C10-I26 |
|                 |                     |      | 1.74 | 49.LP(1)O7              | 414.BD*(1)C10-I29 |
|                 | Vacuum <sup>g</sup> | 3.19 | 1.45 | 50.LP(2)O7              | 414.BD*(1)C10-I29 |
|                 |                     |      | 1.85 | 49.LP(1)O7              | 414.BD*(1)C10-I29 |
|                 | TCM                 | 3.51 | 1.66 | 50.LP(2)O7              | 414.BD*(1)C10-I29 |
| I Cation-Cation |                     |      | 1.80 | 49.LP(1)O7              | 414.BD*(1)C10-I29 |
|                 | DCE                 | 3.61 | 1.76 | 50.LP(2)O7              | 414.BD*(1)C10-I29 |
|                 |                     |      | 0.05 | 51.LP(1)O9 <sup>e</sup> | 414.BD*(1)C10-I29 |
|                 | Acetone             | 3.84 | 1.99 | 49.LP(1)O7              | 414.BD*(1)C10-I29 |

|                  |                     |      |      |            |                   |
|------------------|---------------------|------|------|------------|-------------------|
|                  |                     |      | 1.85 | 50.LP(2)O7 | 414.BD*(1)C10-I29 |
|                  | DMSO                | 3.89 | 2.01 | 49.LP(1)O7 | 414.BD*(1)C10-I29 |
|                  |                     |      | 1.88 | 50.LP(2)O7 | 414.BD*(1)C10-I29 |
|                  | Water               | 3.89 | 2.01 | 49.LP(1)O7 | 414.BD*(1)C10-I29 |
|                  |                     |      | 1.88 | 50.LP(2)O7 | 414.BD*(1)C10-I29 |
| I Neutral-Cation | Vacuum <sup>g</sup> | 2.20 | 1.29 | 48.LP(1)O7 | 408.BD*(1)C10-I28 |
|                  |                     |      | 0.91 | 49.LP(2)O7 | 408.BD*(1)C10-I28 |
|                  | TCM                 | 2.60 | 1.42 | 48.LP(1)O7 | 408.BD*(1)C10-I28 |
|                  |                     |      | 1.18 | 49.LP(2)O7 | 408.BD*(1)C10-I28 |
|                  | DCE                 | 2.86 | 1.55 | 48.LP(1)O7 | 408.BD*(1)C10-I28 |
|                  |                     |      | 1.31 | 49.LP(2)O7 | 408.BD*(1)C10-I28 |
|                  | Acetone             | 3.00 | 1.62 | 48.LP(1)O7 | 408.BD*(1)C10-I28 |
|                  |                     |      | 1.38 | 49.LP(2)O7 | 408.BD*(1)C10-I28 |
|                  | DMSO                | 3.08 | 1.66 | 48.LP(1)O7 | 408.BD*(1)C10-I28 |
|                  |                     |      | 1.42 | 49.LP(2)O7 | 408.BD*(1)C10-I28 |
|                  | Water               | 3.09 | 1.66 | 48.LP(1)O7 | 408.BD*(1)C10-I28 |
|                  |                     |      | 1.43 | 49.LP(2)O7 | 408.BD*(1)C10-I28 |
| I Anion-Cation   | Vacuum <sup>g</sup> | 1.64 | 1.00 | 47.LP(1)O7 | 402.BD*(1)C10-I27 |
|                  |                     |      | 0.64 | 48.LP(2)O7 | 402.BD*(1)C10-I27 |
|                  | TCM                 | 2.06 | 1.12 | 46.LP(1)O7 | 403.BD*(1)C10-I27 |
|                  |                     |      | 0.94 | 47.LP(2)O7 | 403.BD*(1)C10-I27 |
|                  | DCE                 | 2.32 | 1.23 | 46.LP(1)O7 | 403.BD*(1)C10-I27 |
|                  |                     |      | 1.09 | 47.LP(2)O7 | 403.BD*(1)C10-I27 |
|                  | Acetone             | 2.43 | 1.28 | 46.LP(1)O7 | 403.BD*(1)C10-I27 |
|                  |                     |      | 1.15 | 47.LP(2)O7 | 403.BD*(1)C10-I27 |
|                  | DMSO                | 2.49 | 1.30 | 46.LP(1)O7 | 403.BD*(1)C10-I27 |

|       |      |      |            |                   |
|-------|------|------|------------|-------------------|
|       |      | 1.19 | 47.LP(2)O7 | 403.BD*(1)C10-I27 |
|       |      | 1.33 | 46.LP(1)O7 | 403.BD*(1)C10-I27 |
| Water | 2.54 | 1.21 | 47.LP(2)O7 | 403.BD*(1)C10-I27 |

<sup>a</sup>Sum of *b* in each molecular system. Values are in kcal/mol. <sup>b</sup>The corresponding second-order perturbation stabilization energy for each intermolecular electron transfer. Values are in kcal/mol. <sup>c</sup>The natural bond orbitals that donate electrons. For instance, 53.LP(2)O7, refers to one of the orbitals for lone pair of electrons on the acceptor oxygen atom, where 53 is the serial number of this orbital; LP means lone pair; 2 in the brackets is the serial number of lone pair electron orbital for O7, O stands for oxygen and 7 is the serial number of this oxygen atom in the complex geometry. <sup>d</sup>The natural bond orbitals that accept electrons. Similar with c, BD\* stands for antibonding molecular orbital. <sup>e</sup>The lone pair electron orbital for the other oxygen (O9) in the acceptor's carboxyl group, indicating the existence of the multiple halogen bonding. <sup>f</sup>Results based on constrained optimizations. <sup>g</sup>Results based on TCM-optimized geometries.

**Table S17. Calculated atomic charge and electron transfer results from natural population analysis for complexes between differently charged 3-amino-5-chlorobenzoic acid and glycine.<sup>a</sup>**

| Complex           | Environment         | $Q_{CT}^b$ | $q(X)_{monomer}^c$ | $q(X)_{complex}^d$ | $\Delta q(X)^e$ | $\Delta Q_{CTX}^f$ |
|-------------------|---------------------|------------|--------------------|--------------------|-----------------|--------------------|
| Cl Cation-Anion   | Vacuum <sup>g</sup> | 0.0529     | 0.0987             | 0.2192             | 0.1206          | -0.1734            |
|                   | TCM <sup>g</sup>    | 0.0193     | 0.0558             | 0.1051             | 0.0494          | -0.0686            |
|                   | DCE                 | 0.0137     | 0.0469             | 0.0806             | 0.0336          | -0.0473            |
|                   | Acetone             | 0.0123     | 0.0427             | 0.0690             | 0.0264          | -0.0387            |
|                   | DMSO                | 0.0115     | 0.0403             | 0.0623             | 0.0221          | -0.0336            |
|                   | Water               | 0.0113     | 0.0395             | 0.0601             | 0.0206          | -0.0319            |
| Cl Neutral-Anion  | Vacuum <sup>g</sup> | 0.0233     | 0.0131             | 0.1222             | 0.1091          | -0.1324            |
|                   | TCM                 | 0.0094     | 0.0019             | 0.0461             | 0.0442          | -0.0536            |
|                   | DCE                 | 0.0086     | 0.0004             | 0.0289             | 0.0285          | -0.0370            |
|                   | Acetone             | 0.0080     | -0.0011            | 0.0204             | 0.0215          | -0.0295            |
|                   | DMSO                | 0.0074     | -0.0017            | 0.0172             | 0.0189          | -0.0264            |
|                   | Water               | 0.0076     | -0.0018            | 0.0135             | 0.0154          | -0.0229            |
| Cl Anion-Anion    | Vacuum <sup>h</sup> | 0.0039     | -0.0555            | 0.0299             | 0.0854          | -0.0893            |
|                   | TCM                 | 0.0039     | -0.0339            | 0.0039             | 0.0378          | -0.0417            |
|                   | DCE                 | 0.0070     | -0.0294            | 0.0002             | 0.0296          | -0.0366            |
|                   | Acetone             | 0.0069     | -0.0272            | -0.0048            | 0.0225          | -0.0294            |
|                   | DMSO                | 0.0065     | -0.0260            | -0.0106            | 0.0154          | -0.0219            |
|                   | Water               | 0.0065     | -0.0256            | -0.0105            | 0.0151          | -0.0216            |
| Cl Cation-Neutral | Vacuum              | 0.0070     | 0.0987             | 0.1333             | 0.0346          | -0.0417            |
|                   | TCM                 | 0.0061     | 0.0558             | 0.0753             | 0.0195          | -0.0257            |
|                   | DCE                 | 0.0061     | 0.0469             | 0.0620             | 0.0150          | -0.0211            |
|                   | Acetone             | 0.0058     | 0.0427             | 0.0553             | 0.0126          | -0.0184            |
|                   | DMSO                | 0.0056     | 0.0403             | 0.0513             | 0.0110          | -0.0167            |

|                    |                     |        |         |         |         |         |
|--------------------|---------------------|--------|---------|---------|---------|---------|
|                    | Water               | 0.0056 | 0.0395  | 0.0500  | 0.0105  | -0.0162 |
|                    | Vacuum <sup>g</sup> | 0.0038 | 0.0131  | 0.0380  | 0.0249  | -0.0286 |
|                    | TCM                 | 0.0038 | 0.0019  | 0.0193  | 0.0174  | -0.0212 |
| Cl Neutral-Neutral | DCE                 | 0.0039 | 0.0004  | 0.0135  | 0.0130  | -0.0169 |
|                    | Acetone             | 0.0039 | -0.0011 | 0.0104  | 0.0115  | -0.0154 |
|                    | DMSO                | 0.0039 | -0.0017 | 0.0085  | 0.0102  | -0.0141 |
|                    | Water               | 0.0039 | -0.0018 | 0.0079  | 0.0098  | -0.0136 |
|                    | Vacuum <sup>h</sup> | 0.0015 | -0.0555 | -0.0277 | 0.0278  | -0.0293 |
|                    | TCM <sup>g</sup>    | 0.0030 | -0.0339 | -0.0182 | 0.0157  | -0.0186 |
| Cl Anion-Neutral   | DCE                 | 0.0034 | -0.0294 | -0.0178 | 0.0116  | -0.0150 |
|                    | Acetone             | 0.0037 | -0.0272 | -0.0174 | 0.0098  | -0.0135 |
|                    | DMSO                | 0.0039 | -0.0260 | -0.0172 | 0.0088  | -0.0127 |
|                    | Water               | 0.0039 | -0.0256 | -0.0167 | 0.0089  | -0.0128 |
|                    | Vacuum <sup>h</sup> | 0.0026 | 0.0987  | 0.0720  | -0.0267 | 0.0240  |
|                    | TCM                 | 0.0035 | 0.0558  | 0.0567  | 0.0009  | -0.0045 |
| Cl Cation-Cation   | DCE                 | 0.0038 | 0.0469  | 0.0522  | 0.0053  | -0.0091 |
|                    | Acetone             | 0.0040 | 0.0427  | 0.0492  | 0.0065  | -0.0105 |
|                    | DMSO                | 0.0043 | 0.0403  | 0.0469  | 0.0067  | -0.0109 |
|                    | Water               | 0.0043 | 0.0395  | 0.0463  | 0.0068  | -0.0111 |
|                    | Vacuum <sup>h</sup> | 0.0012 | 0.0131  | -0.0098 | -0.0229 | 0.0218  |
|                    | TCM                 | 0.0031 | 0.0019  | 0.0041  | 0.0021  | -0.0053 |
| Cl Neutral-Cation  | DCE                 | 0.0035 | 0.0004  | 0.0046  | 0.0042  | -0.0077 |
|                    | Acetone             | 0.0037 | -0.0011 | 0.0045  | 0.0056  | -0.0093 |
|                    | DMSO                | 0.0038 | -0.0017 | 0.0043  | 0.0060  | -0.0098 |
|                    | Water               | 0.0039 | -0.0018 | 0.0042  | 0.0061  | -0.0099 |

|                 |                     |         |         |         |         |         |
|-----------------|---------------------|---------|---------|---------|---------|---------|
| Cl Anion-Cation | Vacuum <sup>h</sup> | -0.0012 | -0.0555 | -0.0701 | -0.0146 | 0.0159  |
|                 | TCM <sup>g</sup>    | 0.0023  | -0.0339 | -0.0296 | 0.0043  | -0.0065 |
|                 | DCE                 | 0.0027  | -0.0294 | -0.0228 | 0.0067  | -0.0093 |
|                 | Acetone             | 0.0029  | -0.0272 | -0.0202 | 0.0070  | -0.0099 |
|                 | DMSO                | 0.0033  | -0.0260 | -0.0200 | 0.0060  | -0.0093 |
|                 | Water               | 0.0033  | -0.0256 | -0.0196 | 0.0060  | -0.0093 |

<sup>a</sup>All values are in atomic units. <sup>b</sup>Amount of electron transferred from the XB acceptor to donor. <sup>c</sup>Atomic charge of the halogen atom in monomer from natural population analysis (NPA). <sup>d</sup>Atomic charge of the halogen atom in complex from NPA. <sup>e</sup>Difference of *d* and *c*. <sup>f</sup> $\Delta Q_{CTX} = -Q_{CT} - \Delta q(X)$ , negative  $\Delta Q_{CTX}$  value means electron transfer from the halogen atom to the rest of the XB donor molecule, and vice versa. <sup>g</sup>The complex geometry is obtained by constrained optimization. <sup>h</sup>The complex geometry is the optimized structure in TCM.

**Table S18. Calculated atomic charge and charge transfer results from natural population analysis for complexes between differently charged 3-amino-5-bromobenzoic acid and glycine.<sup>a</sup>**

| Complex          | Environment         | $Q_{CT}^b$ | $q(X)_{monomer}^c$ | $q(X)_{complex}^d$ | $\Delta q(X)^e$ | $\Delta Q_{CTX}^f$ |
|------------------|---------------------|------------|--------------------|--------------------|-----------------|--------------------|
| Br Cation-Anion  | Vacuum <sup>g</sup> | 0.1119     | 0.1775             | 0.2852             | 0.1077          | -0.2195            |
|                  | TCM                 | 0.0351     | 0.1289             | 0.1859             | 0.0570          | -0.0920            |
|                  | DCE                 | 0.0282     | 0.1188             | 0.1612             | 0.0423          | -0.0705            |
|                  | Acetone             | 0.0239     | 0.1141             | 0.1486             | 0.0345          | -0.0584            |
|                  | DMSO                | 0.0222     | 0.1113             | 0.1412             | 0.0299          | -0.0520            |
|                  | Water               | 0.0208     | 0.1105             | 0.1386             | 0.0282          | -0.0489            |
| Br Neutral-Anion | Vacuum              | 0.0438     | 0.0780             | 0.1969             | 0.1190          | -0.1628            |
|                  | TCM                 | 0.0228     | 0.0667             | 0.1241             | 0.0574          | -0.0802            |
|                  | DCE                 | 0.0197     | 0.0651             | 0.1075             | 0.0424          | -0.0621            |



|                    |                     |        |         |        |        |         |
|--------------------|---------------------|--------|---------|--------|--------|---------|
|                    | Acetone             | 0.0176 | 0.0642  | 0.0989 | 0.0347 | -0.0523 |
|                    | DMSO                | 0.0151 | 0.0636  | 0.0923 | 0.0286 | -0.0437 |
|                    | Water               | 0.0167 | 0.0635  | 0.0924 | 0.0289 | -0.0455 |
|                    | Vacuum <sup>h</sup> | 0.0143 | -0.0044 | 0.1066 | 0.1110 | -0.1253 |
|                    | TCM                 | 0.0139 | 0.0247  | 0.0786 | 0.0539 | -0.0679 |
|                    | DCE                 | 0.0121 | 0.0308  | 0.0672 | 0.0364 | -0.0484 |
| Br Anion-Anion     | Acetone             | 0.0130 | 0.0337  | 0.0647 | 0.0310 | -0.0440 |
|                    | DMSO                | 0.0130 | 0.0354  | 0.0626 | 0.0272 | -0.0403 |
|                    | Water               | 0.0131 | 0.0359  | 0.0620 | 0.0261 | -0.0392 |
|                    | Vacuum              | 0.0144 | 0.1775  | 0.2160 | 0.0385 | -0.0529 |
|                    | TCM                 | 0.0112 | 0.1289  | 0.1519 | 0.0230 | -0.0342 |
|                    | DCE                 | 0.0109 | 0.1188  | 0.1378 | 0.0189 | -0.0298 |
| Br Cation-Neutral  | Acetone             | 0.0107 | 0.1141  | 0.1307 | 0.0166 | -0.0273 |
|                    | DMSO                | 0.0110 | 0.1113  | 0.1252 | 0.0139 | -0.0248 |
|                    | Water               | 0.0109 | 0.1105  | 0.1239 | 0.0134 | -0.0243 |
|                    | Vacuum <sup>g</sup> | 0.0071 | 0.0780  | 0.1101 | 0.0321 | -0.0392 |
|                    | TCM                 | 0.0081 | 0.0667  | 0.0895 | 0.0228 | -0.0310 |
|                    | DCE                 | 0.0083 | 0.0651  | 0.0837 | 0.0187 | -0.0270 |
| Br Neutral-Neutral | Acetone             | 0.0083 | 0.0642  | 0.0802 | 0.0160 | -0.0243 |
|                    | DMSO                | 0.0085 | 0.0636  | 0.0777 | 0.0140 | -0.0225 |
|                    | Water               | 0.0085 | 0.0635  | 0.0770 | 0.0135 | -0.0220 |
|                    | Vacuum <sup>h</sup> | 0.0037 | -0.0044 | 0.0297 | 0.0341 | -0.0378 |
|                    | TCM <sup>g</sup>    | 0.0060 | 0.0247  | 0.0450 | 0.0203 | -0.0263 |
|                    | DCE <sup>g</sup>    | 0.0066 | 0.0308  | 0.0475 | 0.0167 | -0.0233 |
| Br Anion-Neutral   | Acetone             | 0.0070 | 0.0337  | 0.0484 | 0.0147 | -0.0217 |
|                    | DMSO                | 0.0072 | 0.0354  | 0.0489 | 0.0135 | -0.0207 |

|                   |                     |         |         |         |         |         |
|-------------------|---------------------|---------|---------|---------|---------|---------|
| Br Cation-Cation  | Water               | 0.0073  | 0.0359  | 0.0490  | 0.0132  | -0.0204 |
|                   | Vacuum <sup>h</sup> | 0.0056  | 0.1775  | 0.1483  | -0.0292 | 0.0236  |
|                   | TCM                 | 0.0073  | 0.1289  | 0.1319  | 0.0030  | -0.0103 |
|                   | DCE                 | 0.0079  | 0.1188  | 0.1266  | 0.0078  | -0.0156 |
|                   | Acetone             | 0.0081  | 0.1141  | 0.1227  | 0.0087  | -0.0167 |
|                   | DMSO                | 0.0082  | 0.1113  | 0.1208  | 0.0094  | -0.0177 |
|                   | Water               | 0.0083  | 0.1105  | 0.1202  | 0.0097  | -0.0180 |
| Br Neutral-Cation | Vacuum <sup>h</sup> | 0.0022  | 0.0780  | 0.0529  | -0.0250 | 0.0228  |
|                   | TCM                 | 0.0052  | 0.0667  | 0.0710  | 0.0043  | -0.0095 |
|                   | DCE                 | 0.0056  | 0.0651  | 0.0716  | 0.0065  | -0.0121 |
|                   | Acetone             | 0.0062  | 0.0642  | 0.0733  | 0.0091  | -0.0153 |
|                   | DMSO                | 0.0066  | 0.0636  | 0.0739  | 0.0103  | -0.0169 |
|                   | Water               | 0.0066  | 0.0635  | 0.0740  | 0.0105  | -0.0171 |
|                   | Vacuum <sup>h</sup> | -0.0011 | -0.0044 | -0.0200 | -0.0156 | 0.0166  |
| Br Anion-Cation   | TCM                 | 0.0042  | 0.0247  | 0.0304  | 0.0057  | -0.0099 |
|                   | DCE                 | 0.0048  | 0.0308  | 0.0394  | 0.0086  | -0.0135 |
|                   | Acetone             | 0.0052  | 0.0337  | 0.0433  | 0.0096  | -0.0149 |
|                   | DMSO                | 0.0051  | 0.0354  | 0.0432  | 0.0078  | -0.0129 |
|                   | Water               | 0.0059  | 0.0359  | 0.0446  | 0.0087  | -0.0146 |

<sup>a</sup>All values are in atomic units. <sup>b</sup>Amount of electron transferred from the XB acceptor to donor. <sup>c</sup>Atomic charge of the halogen atom in monomer from natural population analysis (NPA). <sup>d</sup>Atomic charge of the halogen atom in complex from NPA. <sup>e</sup>Difference of *d* and *c*. <sup>f</sup> $\Delta Q_{CTX} = -Q_{CT} - \Delta q(X)$ , negative  $\Delta Q_{CTX}$  value means electron transfer from the halogen atom to the rest of the XB donor molecule, and vice versa. <sup>g</sup>The complex geometry is obtained by constrained optimization. <sup>h</sup>The complex geometry is the optimized structure in TCM.

**Table S19. Calculated atomic charge and charge transfer results from natural population analysis for complexes between differently charged 3-amino-5-iodobenzoic acid and glycine.<sup>a</sup>**

| Complex          | Environment | $Q_{CT}^b$ | $q(X)_{monomer}^c$ | $q(X)_{complex}^d$ | $\Delta q(X)^e$ | $\Delta Q_{CTX}^f$ |
|------------------|-------------|------------|--------------------|--------------------|-----------------|--------------------|
| I Cation-Anion   | Vacuum      | 0.1723     | 0.3121             | 0.4009             | 0.0887          | -0.2611            |
|                  | TCM         | 0.0782     | 0.2580             | 0.3213             | 0.0633          | -0.1415            |
|                  | DCE         | 0.0642     | 0.2470             | 0.2990             | 0.0520          | -0.1162            |
|                  | Acetone     | 0.0562     | 0.2418             | 0.2888             | 0.0470          | -0.1032            |
|                  | DMSO        | 0.0530     | 0.2388             | 0.2820             | 0.0433          | -0.0962            |
|                  | Water       | 0.0520     | 0.2378             | 0.2798             | 0.0420          | -0.0939            |
| I Neutral-Anion  | Vacuum      | 0.0861     | 0.1916             | 0.3203             | 0.1287          | -0.2147            |
|                  | TCM         | 0.0498     | 0.1842             | 0.2593             | 0.0752          | -0.1250            |
|                  | DCE         | 0.0411     | 0.1831             | 0.2436             | 0.0605          | -0.1016            |
|                  | Acetone     | 0.0372     | 0.1829             | 0.2351             | 0.0522          | -0.0894            |
|                  | DMSO        | 0.0383     | 0.1827             | 0.2310             | 0.0484          | -0.0866            |
|                  | Water       | 0.0355     | 0.1826             | 0.2286             | 0.0460          | -0.0815            |
| I Anion-Anion    | Vacuum      | 0.0190     | 0.0878             | 0.2269             | 0.1392          | -0.1582            |
|                  | TCM         | 0.0313     | 0.1330             | 0.2096             | 0.0766          | -0.1078            |
|                  | DCE         | 0.0299     | 0.1422             | 0.2033             | 0.0611          | -0.0909            |
|                  | Acetone     | 0.0299     | 0.1467             | 0.1999             | 0.0533          | -0.0832            |
|                  | DMSO        | 0.0299     | 0.1492             | 0.1980             | 0.0488          | -0.0787            |
|                  | Water       | 0.0298     | 0.1500             | 0.1973             | 0.0473          | -0.0771            |
| I Cation-Neutral | Vacuum      | 0.0264     | 0.3121             | 0.3555             | 0.0434          | -0.0698            |
|                  | TCM         | 0.0209     | 0.2580             | 0.2890             | 0.0310          | -0.0519            |
|                  | DCE         | 0.0203     | 0.2470             | 0.2741             | 0.0271          | -0.0474            |
|                  | Acetone     | 0.0201     | 0.2418             | 0.2667             | 0.0249          | -0.0450            |
|                  | DMSO        | 0.0199     | 0.2388             | 0.2624             | 0.0236          | -0.0435            |

|                   |                     |        |        |        |         |         |
|-------------------|---------------------|--------|--------|--------|---------|---------|
|                   | Water               | 0.0197 | 0.2378 | 0.2610 | 0.0232  | -0.0429 |
|                   | Vacuum              | 0.0126 | 0.1916 | 0.2335 | 0.0419  | -0.0545 |
|                   | TCM                 | 0.0146 | 0.1842 | 0.2179 | 0.0337  | -0.0483 |
| I Neutral-Neutral | DCE                 | 0.0155 | 0.1831 | 0.2111 | 0.0280  | -0.0436 |
|                   | Acetone             | 0.0161 | 0.1829 | 0.2099 | 0.0271  | -0.0431 |
|                   | DMSO                | 0.0159 | 0.1827 | 0.2085 | 0.0259  | -0.0417 |
|                   | Water               | 0.0163 | 0.1826 | 0.2070 | 0.0244  | -0.0406 |
|                   | Vacuum <sup>g</sup> | 0.0055 | 0.0878 | 0.1246 | 0.0368  | -0.0422 |
|                   | TCM                 | 0.0107 | 0.1330 | 0.1632 | 0.0302  | -0.0409 |
| I Anion-Neutral   | DCE                 | 0.0123 | 0.1422 | 0.1712 | 0.0290  | -0.0412 |
|                   | Acetone             | 0.0130 | 0.1467 | 0.1738 | 0.0272  | -0.0401 |
|                   | DMSO                | 0.0134 | 0.1492 | 0.1751 | 0.0259  | -0.0393 |
|                   | Water               | 0.0139 | 0.1500 | 0.1741 | 0.0241  | -0.0379 |
|                   | Vacuum <sup>h</sup> | 0.0101 | 0.3121 | 0.2817 | -0.0304 | 0.0203  |
|                   | TCM                 | 0.0133 | 0.2580 | 0.2655 | 0.0075  | -0.0208 |
| I Cation-Cation   | DCE                 | 0.0144 | 0.2470 | 0.2591 | 0.0122  | -0.0266 |
|                   | Acetone             | 0.0148 | 0.2418 | 0.2574 | 0.0156  | -0.0305 |
|                   | DMSO                | 0.0151 | 0.2388 | 0.2556 | 0.0168  | -0.0319 |
|                   | Water               | 0.0151 | 0.2378 | 0.2550 | 0.0172  | -0.0323 |
|                   | Vacuum <sup>h</sup> | 0.0036 | 0.1916 | 0.1682 | -0.0234 | 0.0198  |
|                   | TCM                 | 0.0093 | 0.1842 | 0.1947 | 0.0105  | -0.0198 |
| I Neutral-Cation  | DCE                 | 0.0107 | 0.1831 | 0.1989 | 0.0158  | -0.0265 |
|                   | Acetone             | 0.0113 | 0.1829 | 0.2007 | 0.0179  | -0.0292 |
|                   | DMSO                | 0.0117 | 0.1827 | 0.2016 | 0.0190  | -0.0307 |
|                   | Water               | 0.0118 | 0.1826 | 0.2019 | 0.0193  | -0.0311 |

|                |                     |         |        |        |         |         |
|----------------|---------------------|---------|--------|--------|---------|---------|
| I Anion-Cation | Vacuum <sup>h</sup> | -0.0030 | 0.0878 | 0.0773 | -0.0104 | 0.0134  |
|                | TCM                 | 0.0071  | 0.1330 | 0.1443 | 0.0113  | -0.0184 |
|                | DCE                 | 0.0088  | 0.1422 | 0.1582 | 0.0159  | -0.0247 |
|                | Acetone             | 0.0096  | 0.1467 | 0.1641 | 0.0175  | -0.0270 |
|                | DMSO                | 0.0099  | 0.1492 | 0.1673 | 0.0181  | -0.0281 |
|                | Water               | 0.0102  | 0.1500 | 0.1685 | 0.0184  | -0.0286 |

---

<sup>a</sup>All values are in atomic units. <sup>b</sup>Amount of electron transferred from the XB acceptor to donor. <sup>c</sup>Atomic charge of the halogen atom in monomer from natural population analysis (NPA). <sup>d</sup>Atomic charge of the halogen atom in complex from NPA. <sup>e</sup>Difference of *d* and *c*. <sup>f</sup> $\Delta Q_{CTX} = -Q_{CT} - \Delta q(X)$ , negative  $\Delta Q_{CTX}$  value means electron transfer from the halogen atom to the rest of the XB donor molecule, and vice versa. <sup>g</sup>The complex geometry is obtained by constrained optimization. <sup>h</sup>The complex geometry is the optimized structure in TCM.

**Table S20. Calculated atomic charge and electron transfer results from Hirshfeld population analysis for complexes between differently charged 3-amino-5-chlorobenzoic acid and glycine.<sup>a</sup>**

| Complex           | Environment         | $Q_{CT}^b$ | $q(X)_{monomer}^c$ | $q(X)_{complex}^d$ | $\Delta q(X)^e$ | $\Delta Q_{CTX}^f$ |
|-------------------|---------------------|------------|--------------------|--------------------|-----------------|--------------------|
| Cl Cation-Anion   | Vacuum <sup>g</sup> | 0.1507     | 0.0267             | 0.0546             | 0.0279          | -0.1786            |
|                   | TCM <sup>g</sup>    | 0.0777     | -0.0137            | -0.0199            | -0.0062         | -0.0715            |
|                   | DCE                 | 0.0653     | -0.0222            | -0.0380            | -0.0158         | -0.0495            |
|                   | Acetone             | 0.0614     | -0.0262            | -0.0468            | -0.0206         | -0.0408            |
|                   | DMSO                | 0.0593     | -0.0285            | -0.0521            | -0.0236         | -0.0357            |
|                   | Water               | 0.0586     | -0.0293            | -0.0538            | -0.0245         | -0.0340            |
| Cl Neutral-Anion  | Vacuum <sup>g</sup> | 0.0858     | -0.0565            | -0.0088            | 0.0477          | -0.1335            |
|                   | TCM                 | 0.0518     | -0.0675            | -0.0651            | 0.0025          | -0.0542            |
|                   | DCE                 | 0.0477     | -0.0693            | -0.0785            | -0.0092         | -0.0385            |
|                   | Acetone             | 0.0455     | -0.0707            | -0.0853            | -0.0146         | -0.0309            |
|                   | DMSO                | 0.0453     | -0.0713            | -0.0889            | -0.0176         | -0.0277            |
|                   | Water               | 0.0435     | -0.0714            | -0.0906            | -0.0191         | -0.0244            |
| Cl Anion-Anion    | Vacuum <sup>h</sup> | 0.0337     | -0.1256            | -0.0695            | 0.0560          | -0.0898            |
|                   | TCM                 | 0.0338     | -0.1044            | -0.0960            | 0.0084          | -0.0422            |
|                   | DCE                 | 0.0422     | -0.1001            | -0.1048            | -0.0047         | -0.0375            |
|                   | Acetone             | 0.0417     | -0.0980            | -0.1093            | -0.0113         | -0.0304            |
|                   | DMSO                | 0.0383     | -0.0968            | -0.1122            | -0.0154         | -0.0228            |
|                   | Water               | 0.0394     | -0.0964            | -0.1131            | -0.0167         | -0.0227            |
| Cl Cation-Neutral | Vacuum              | 0.0407     | 0.0267             | 0.0289             | 0.0022          | -0.0430            |
|                   | TCM                 | 0.0336     | -0.0137            | -0.0202            | -0.0064         | -0.0271            |
|                   | DCE                 | 0.0317     | -0.0222            | -0.0313            | -0.0091         | -0.0226            |
|                   | Acetone             | 0.0305     | -0.0262            | -0.0369            | -0.0106         | -0.0198            |
|                   | DMSO                | 0.0296     | -0.0285            | -0.0401            | -0.0115         | -0.0181            |

|                    |                     |        |         |         |         |         |
|--------------------|---------------------|--------|---------|---------|---------|---------|
|                    | Water               | 0.0295 | -0.0293 | -0.0412 | -0.0119 | -0.0176 |
|                    | Vacuum <sup>g</sup> | 0.0194 | -0.0565 | -0.0467 | 0.0098  | -0.0292 |
|                    | TCM                 | 0.0225 | -0.0675 | -0.0683 | -0.0007 | -0.0218 |
| Cl Neutral-Neutral | DCE                 | 0.0227 | -0.0693 | -0.0742 | -0.0049 | -0.0178 |
|                    | Acetone             | 0.0228 | -0.0707 | -0.0773 | -0.0066 | -0.0162 |
|                    | DMSO                | 0.0228 | -0.0713 | -0.0791 | -0.0078 | -0.0149 |
|                    | Water               | 0.0227 | -0.0714 | -0.0797 | -0.0083 | -0.0144 |
|                    | Vacuum <sup>h</sup> | 0.0090 | -0.1256 | -0.1058 | 0.0197  | -0.0287 |
|                    | TCM <sup>g</sup>    | 0.0147 | -0.1044 | -0.1001 | 0.0043  | -0.0191 |
| Cl Anion-Neutral   | DCE                 | 0.0163 | -0.1001 | -0.1007 | -0.0006 | -0.0157 |
|                    | Acetone             | 0.0175 | -0.0980 | -0.1012 | -0.0032 | -0.0142 |
|                    | DMSO                | 0.0183 | -0.0968 | -0.1016 | -0.0048 | -0.0135 |
|                    | Water               | 0.0193 | -0.0964 | -0.1020 | -0.0056 | -0.0137 |
|                    | Vacuum <sup>h</sup> | 0.0153 | 0.0267  | -0.0088 | -0.0355 | 0.0202  |
|                    | TCM                 | 0.0189 | -0.0137 | -0.0269 | -0.0131 | -0.0057 |
| Cl Cation-Cation   | DCE                 | 0.0213 | -0.0222 | -0.0333 | -0.0111 | -0.0102 |
|                    | Acetone             | 0.0219 | -0.0262 | -0.0366 | -0.0103 | -0.0115 |
|                    | DMSO                | 0.0218 | -0.0285 | -0.0384 | -0.0098 | -0.0120 |
|                    | Water               | 0.0219 | -0.0293 | -0.0390 | -0.0097 | -0.0122 |
|                    | Vacuum <sup>h</sup> | 0.0050 | -0.0565 | -0.0819 | -0.0254 | 0.0204  |
|                    | TCM                 | 0.0135 | -0.0675 | -0.0747 | -0.0072 | -0.0063 |
| Cl Neutral-Cation  | DCE                 | 0.0151 | -0.0693 | -0.0755 | -0.0062 | -0.0089 |
|                    | Acetone             | 0.0160 | -0.0707 | -0.0763 | -0.0056 | -0.0104 |
|                    | DMSO                | 0.0164 | -0.0713 | -0.0768 | -0.0055 | -0.0109 |
|                    | Water               | 0.0165 | -0.0714 | -0.0770 | -0.0056 | -0.0110 |

|                 |                     |         |         |         |         |         |
|-----------------|---------------------|---------|---------|---------|---------|---------|
| Cl Anion-Cation | Vacuum <sup>h</sup> | -0.0013 | -0.1256 | -0.1417 | -0.0162 | 0.0174  |
|                 | TCM <sup>g</sup>    | 0.0124  | -0.1044 | -0.1095 | -0.0050 | -0.0073 |
|                 | DCE                 | 0.0139  | -0.1001 | -0.1040 | -0.0039 | -0.0100 |
|                 | Acetone             | 0.0147  | -0.0980 | -0.1021 | -0.0041 | -0.0106 |
|                 | DMSO                | 0.0136  | -0.0968 | -0.1003 | -0.0035 | -0.0101 |
|                 | Water               | 0.0138  | -0.0964 | -0.1000 | -0.0036 | -0.0102 |

<sup>a</sup>All values are in atomic units. <sup>b</sup>Amount of electron transferred from the XB acceptor to donor. <sup>c</sup>Atomic charge of the halogen atom in monomer from Hirshfeld population analysis (HPA). <sup>d</sup>Atomic charge of the halogen atom in complex from HPA. <sup>e</sup>Difference of *d* and *c*. <sup>f</sup> $\Delta Q_{CTX} = -Q_{CT} - \Delta q(X)$ , negative  $\Delta Q_{CTX}$  value means electron transfer from the halogen atom to the rest of the XB donor molecule, and vice versa. <sup>g</sup>The complex geometry is obtained by constrained optimization. <sup>h</sup>The complex geometry is the optimized structure in TCM.

**Table S21. Calculated atomic charge and charge transfer results from Hirshfeld population analysis for complexes between differently charged 3-amino-5-bromobenzoic acid and glycine.<sup>a</sup>**

| Complex          | Environment         | $Q_{CT}^b$ | $q(X)_{\text{monomer}}^c$ | $q(X)_{\text{complex}}^d$ | $\Delta q(X)^e$ | $\Delta Q_{CTX}^f$ |
|------------------|---------------------|------------|---------------------------|---------------------------|-----------------|--------------------|
| Br Cation-Anion  | Vacuum <sup>g</sup> | 0.2384     | 0.0573                    | 0.0459                    | -0.0115         | -0.2269            |
|                  | TCM                 | 0.1136     | 0.0118                    | -0.0083                   | -0.0201         | -0.0935            |
|                  | DCE                 | 0.1002     | 0.0023                    | -0.0267                   | -0.0290         | -0.0713            |
|                  | Acetone             | 0.0918     | -0.0022                   | -0.0352                   | -0.0329         | -0.0588            |
|                  | DMSO                | 0.0879     | -0.0048                   | -0.0403                   | -0.0355         | -0.0524            |
|                  | Water               | 0.0854     | -0.0057                   | -0.0416                   | -0.0359         | -0.0495            |
| Br Neutral-Anion | Vacuum              | 0.1283     | -0.0391                   | -0.0046                   | 0.0345          | -0.1628            |
|                  | TCM                 | 0.0883     | -0.0503                   | -0.0590                   | -0.0087         | -0.0796            |
|                  | DCE                 | 0.0802     | -0.0521                   | -0.0706                   | -0.0185         | -0.0617            |



|                    |                     |        |         |         |         |         |
|--------------------|---------------------|--------|---------|---------|---------|---------|
|                    | Acetone             | 0.0760 | -0.0531 | -0.0772 | -0.0241 | -0.0519 |
|                    | DMSO                | 0.0693 | -0.0536 | -0.0795 | -0.0258 | -0.0435 |
|                    | Water               | 0.0740 | -0.0538 | -0.0825 | -0.0287 | -0.0453 |
|                    | Vacuum <sup>h</sup> | 0.0654 | -0.1212 | -0.0634 | 0.0579  | -0.1233 |
|                    | TCM                 | 0.0650 | -0.0933 | -0.0915 | 0.0018  | -0.0667 |
|                    | DCE                 | 0.0580 | -0.0875 | -0.0984 | -0.0109 | -0.0471 |
| Br Anion-Anion     | Acetone             | 0.0610 | -0.0848 | -0.1027 | -0.0179 | -0.0431 |
|                    | DMSO                | 0.0615 | -0.0832 | -0.1053 | -0.0221 | -0.0395 |
|                    | Water               | 0.0618 | -0.0827 | -0.1061 | -0.0234 | -0.0384 |
|                    | Vacuum              | 0.0591 | 0.0573  | 0.0510  | -0.0063 | -0.0529 |
|                    | TCM                 | 0.0480 | 0.0118  | -0.0017 | -0.0135 | -0.0344 |
|                    | DCE                 | 0.0464 | 0.0023  | -0.0140 | -0.0163 | -0.0301 |
| Br Cation-Neutral  | Acetone             | 0.0456 | -0.0022 | -0.0201 | -0.0179 | -0.0277 |
|                    | DMSO                | 0.0438 | -0.0048 | -0.0232 | -0.0183 | -0.0255 |
|                    | Water               | 0.0436 | -0.0057 | -0.0243 | -0.0186 | -0.0249 |
|                    | Vacuum <sup>g</sup> | 0.0328 | -0.0391 | -0.0332 | 0.0060  | -0.0388 |
|                    | TCM                 | 0.0353 | -0.0503 | -0.0549 | -0.0047 | -0.0306 |
|                    | DCE                 | 0.0359 | -0.0521 | -0.0612 | -0.0090 | -0.0268 |
| Br Neutral-Neutral | Acetone             | 0.0354 | -0.0531 | -0.0642 | -0.0112 | -0.0243 |
|                    | DMSO                | 0.0347 | -0.0536 | -0.0658 | -0.0121 | -0.0226 |
|                    | Water               | 0.0347 | -0.0538 | -0.0664 | -0.0126 | -0.0221 |
|                    | Vacuum <sup>h</sup> | 0.0160 | -0.1212 | -0.1015 | 0.0197  | -0.0357 |
|                    | TCM <sup>g</sup>    | 0.0244 | -0.0933 | -0.0918 | 0.0015  | -0.0258 |
|                    | DCE <sup>g</sup>    | 0.0271 | -0.0875 | -0.0915 | -0.0040 | -0.0230 |
| Br Anion-Neutral   | Acetone             | 0.0285 | -0.0848 | -0.0919 | -0.0071 | -0.0214 |
|                    | DMSO                | 0.0294 | -0.0832 | -0.0921 | -0.0089 | -0.0205 |

|                   |                     |        |         |         |         |         |
|-------------------|---------------------|--------|---------|---------|---------|---------|
|                   | Water               | 0.0297 | -0.0827 | -0.0922 | -0.0095 | -0.0202 |
|                   | Vacuum <sup>h</sup> | 0.0268 | 0.0573  | 0.0113  | -0.0460 | 0.0192  |
|                   | TCM                 | 0.0321 | 0.0118  | -0.0090 | -0.0209 | -0.0112 |
| Br Cation-Cation  | DCE                 | 0.0348 | 0.0023  | -0.0162 | -0.0185 | -0.0162 |
|                   | Acetone             | 0.0345 | -0.0022 | -0.0194 | -0.0172 | -0.0173 |
|                   | DMSO                | 0.0349 | -0.0048 | -0.0216 | -0.0167 | -0.0182 |
|                   | Water               | 0.0351 | -0.0057 | -0.0223 | -0.0167 | -0.0185 |
|                   | Vacuum <sup>h</sup> | 0.0121 | -0.0391 | -0.0733 | -0.0341 | 0.0220  |
|                   | TCM                 | 0.0230 | -0.0503 | -0.0637 | -0.0134 | -0.0095 |
| Br Neutral-Cation | DCE                 | 0.0245 | -0.0521 | -0.0642 | -0.0121 | -0.0124 |
|                   | Acetone             | 0.0269 | -0.0531 | -0.0647 | -0.0116 | -0.0154 |
|                   | DMSO                | 0.0287 | -0.0536 | -0.0653 | -0.0117 | -0.0170 |
|                   | Water               | 0.0289 | -0.0538 | -0.0655 | -0.0117 | -0.0172 |
|                   | Vacuum <sup>h</sup> | 0.0007 | -0.1212 | -0.1421 | -0.0209 | 0.0202  |
|                   | TCM                 | 0.0186 | -0.0933 | -0.1023 | -0.0090 | -0.0095 |
| Br Anion-Cation   | DCE                 | 0.0214 | -0.0875 | -0.0958 | -0.0083 | -0.0131 |
|                   | Acetone             | 0.0229 | -0.0848 | -0.0932 | -0.0084 | -0.0145 |
|                   | DMSO                | 0.0212 | -0.0832 | -0.0916 | -0.0084 | -0.0128 |
|                   | Water               | 0.0226 | -0.0827 | -0.0907 | -0.0080 | -0.0145 |

<sup>a</sup>All values are in atomic units. <sup>b</sup>Amount of electron transferred from the XB acceptor to donor. <sup>c</sup>Atomic charge of the halogen atom in monomer from Hirshfeld population analysis (HPA). <sup>d</sup>Atomic charge of the halogen atom in complex from HPA. <sup>e</sup>Difference of *d* and *c*. <sup>f</sup> $\Delta Q_{CTX} = -Q_{CT} - \Delta q(X)$ , negative  $\Delta Q_{CTX}$  value means electron transfer from the halogen atom to the rest of the XB donor molecule, and vice versa. <sup>g</sup>The complex geometry is obtained by constrained optimization. <sup>h</sup>The complex geometry is the optimized structure in TCM.

**Table S22. Calculated atomic charge and charge transfer results from Hirshfeld population analysis for complexes between differently charged 3-amino-5-iodobenzoic acid and glycine.<sup>a</sup>**

| Complex          | Environment | $Q_{CT}^b$ | $q(X)_{monomer}^c$ | $q(X)_{complex}^d$ | $\Delta q(X)^e$ | $\Delta Q_{CTX}^f$ |
|------------------|-------------|------------|--------------------|--------------------|-----------------|--------------------|
| I Cation-Anion   | Vacuum      | 0.3419     | 0.1131             | 0.0580             | -0.0552         | -0.2867            |
|                  | TCM         | 0.1968     | 0.0627             | 0.0138             | -0.0489         | -0.1479            |
|                  | DCE         | 0.1729     | 0.0523             | -0.0003            | -0.0526         | -0.1203            |
|                  | Acetone     | 0.1586     | 0.0474             | -0.0070            | -0.0543         | -0.1042            |
|                  | DMSO        | 0.1530     | 0.0445             | -0.0116            | -0.0561         | -0.0969            |
|                  | Water       | 0.1511     | 0.0436             | -0.0131            | -0.0567         | -0.0944            |
| I Neutral-Anion  | Vacuum      | 0.2083     | -0.0024            | 0.0092             | 0.0115          | -0.2199            |
|                  | TCM         | 0.1465     | -0.0102            | -0.0338            | -0.0236         | -0.1229            |
|                  | DCE         | 0.1300     | -0.0115            | -0.0427            | -0.0312         | -0.0988            |
|                  | Acetone     | 0.1228     | -0.0118            | -0.0485            | -0.0366         | -0.0862            |
|                  | DMSO        | 0.1242     | -0.0121            | -0.0528            | -0.0407         | -0.0836            |
|                  | Water       | 0.1194     | -0.0122            | -0.0533            | -0.0411         | -0.0782            |
| I Anion-Anion    | Vacuum      | 0.0926     | -0.1033            | -0.0435            | 0.0597          | -0.1523            |
|                  | TCM         | 0.1100     | -0.0620            | -0.0685            | -0.0065         | -0.1034            |
|                  | DCE         | 0.1067     | -0.0535            | -0.0734            | -0.0199         | -0.0868            |
|                  | Acetone     | 0.1069     | -0.0495            | -0.0772            | -0.0277         | -0.0792            |
|                  | DMSO        | 0.1070     | -0.0472            | -0.0795            | -0.0322         | -0.0748            |
|                  | Water       | 0.1070     | -0.0465            | -0.0802            | -0.0338         | -0.0733            |
| I Cation-Neutral | Vacuum      | 0.0888     | 0.1131             | 0.0943             | -0.0188         | -0.0699            |
|                  | TCM         | 0.0741     | 0.0627             | 0.0395             | -0.0232         | -0.0509            |
|                  | DCE         | 0.0720     | 0.0523             | 0.0266             | -0.0257         | -0.0463            |
|                  | Acetone     | 0.0711     | 0.0474             | 0.0201             | -0.0272         | -0.0438            |
|                  | DMSO        | 0.0705     | 0.0445             | 0.0164             | -0.0282         | -0.0423            |

|                   |                     |        |         |         |         |         |
|-------------------|---------------------|--------|---------|---------|---------|---------|
| I Neutral-Neutral | Water               | 0.0701 | 0.0436  | 0.0152  | -0.0285 | -0.0417 |
|                   | Vacuum              | 0.0501 | -0.0024 | -0.0009 | 0.0014  | -0.0515 |
|                   | TCM                 | 0.0563 | -0.0102 | -0.0212 | -0.0110 | -0.0454 |
|                   | DCE                 | 0.0563 | -0.0115 | -0.0269 | -0.0154 | -0.0409 |
|                   | Acetone             | 0.0585 | -0.0118 | -0.0299 | -0.0181 | -0.0404 |
|                   | DMSO                | 0.0588 | -0.0121 | -0.0319 | -0.0198 | -0.0391 |
|                   | Water               | 0.0582 | -0.0122 | -0.0323 | -0.0201 | -0.0381 |
| I Anion-Neutral   | Vacuum <sup>g</sup> | 0.0223 | -0.1033 | -0.0862 | 0.0170  | -0.0393 |
|                   | TCM                 | 0.0410 | -0.0620 | -0.0644 | -0.0025 | -0.0385 |
|                   | DCE                 | 0.0475 | -0.0535 | -0.0623 | -0.0088 | -0.0387 |
|                   | Acetone             | 0.0502 | -0.0495 | -0.0621 | -0.0126 | -0.0377 |
|                   | DMSO                | 0.0515 | -0.0472 | -0.0619 | -0.0147 | -0.0369 |
|                   | Water               | 0.0508 | -0.0465 | -0.0614 | -0.0150 | -0.0358 |
|                   | Vacuum <sup>h</sup> | 0.0434 | 0.1131  | 0.0539  | -0.0592 | 0.0158  |
| I Cation-Cation   | TCM                 | 0.0516 | 0.0627  | 0.0318  | -0.0309 | -0.0207 |
|                   | DCE                 | 0.0532 | 0.0523  | 0.0251  | -0.0272 | -0.0260 |
|                   | Acetone             | 0.0557 | 0.0474  | 0.0213  | -0.0261 | -0.0296 |
|                   | DMSO                | 0.0563 | 0.0445  | 0.0191  | -0.0254 | -0.0309 |
|                   | Water               | 0.0564 | 0.0436  | 0.0184  | -0.0252 | -0.0313 |
|                   | Vacuum <sup>h</sup> | 0.0221 | -0.0024 | -0.0449 | -0.0425 | 0.0204  |
|                   | TCM                 | 0.0385 | -0.0102 | -0.0308 | -0.0206 | -0.0179 |
| I Neutral-Cation  | DCE                 | 0.0428 | -0.0115 | -0.0300 | -0.0185 | -0.0243 |
|                   | Acetone             | 0.0449 | -0.0118 | -0.0299 | -0.0180 | -0.0269 |
|                   | DMSO                | 0.0460 | -0.0121 | -0.0299 | -0.0177 | -0.0283 |
|                   | Water               | 0.0464 | -0.0122 | -0.0299 | -0.0177 | -0.0287 |

|                |                     |        |         |         |         |         |
|----------------|---------------------|--------|---------|---------|---------|---------|
| I Anion-Cation | Vacuum <sup>h</sup> | 0.0025 | -0.1033 | -0.1256 | -0.0224 | 0.0199  |
|                | TCM                 | 0.0297 | -0.0620 | -0.0751 | -0.0132 | -0.0165 |
|                | DCE                 | 0.0353 | -0.0535 | -0.0660 | -0.0125 | -0.0228 |
|                | Acetone             | 0.0378 | -0.0495 | -0.0622 | -0.0126 | -0.0252 |
|                | DMSO                | 0.0390 | -0.0472 | -0.0600 | -0.0128 | -0.0262 |
|                | Water               | 0.0398 | -0.0465 | -0.0594 | -0.0130 | -0.0268 |

---

<sup>a</sup>All values are in atomic units. <sup>b</sup>Amount of electron transferred from the XB acceptor to donor. <sup>c</sup>Atomic charge of the halogen atom in monomer from Hirshfeld population analysis (HPA). <sup>d</sup>Atomic charge of the halogen atom in complex from HPA. <sup>e</sup>Difference of *d* and *c*. <sup>f</sup> $\Delta Q_{CTX} = -Q_{CT} - \Delta q(X)$ , negative  $\Delta Q_{CTX}$  value means electron transfer from the halogen atom to the rest of the XB donor molecule, and vice versa. <sup>g</sup>The complex geometry is obtained by constrained optimization. <sup>h</sup>The complex geometry is the optimized structure in TCM.

**Table S23. Calculated binding energies and geometrical parameters for complexes between the neutral 3-amino-5-halobenzoic acid donors, and six-membered oxocarbenium, dimethyloxidanium, methylguanidinium cation acceptors in dichloroethane.**

| Complex                                                       | $E_{\text{bind}}^a$ | $d^b$ | $\theta^c$ |
|---------------------------------------------------------------|---------------------|-------|------------|
| Cl Neutral-Cation oxocarbenium <sup>+</sup> <sup>d</sup>      | -0.84               | 3.13  | 173.1      |
| Br Neutral-Cation oxocarbenium <sup>+</sup>                   | -0.96               | 3.24  | 174.2      |
| I Neutral-Cation oxocarbenium <sup>+</sup>                    | -0.98               | 3.33  | 175.6      |
| Cl Neutral-Cation dimethyloxidanium <sup>+</sup> <sup>e</sup> | -1.03               | 3.12  | 177.3      |
| Br Neutral-Cation dimethyloxidanium <sup>+</sup>              | -1.27               | 3.20  | 166.3      |
| I Neutral-Cation dimethyloxidanium <sup>+</sup>               | -1.28               | 3.39  | 156.0      |
| Cl Neutral-Cation Me-gua <sup>+</sup> <sup>f</sup>            | -1.70               | 3.16  | 171.1      |
| Br Neutral-Cation Me-gua <sup>+</sup>                         | -1.78               | 3.26  | 172.5      |
| I Neutral-Cation Me-gua <sup>+</sup>                          | -1.91               | 3.38  | 169.7      |

<sup>a</sup>Calculated binding energies, values are in kcal/mol. <sup>b</sup>The interaction distance, values are in angstrom.

<sup>c</sup>The interaction angle, values are in degree. <sup>d</sup>Complex formed between neutral 3-amino-5-halobenzoic acid and six-membered oxocarbenium cation. <sup>e</sup>Complex formed between neutral 3-amino-5-halobenzoic acid and dimethyloxidanium cation. <sup>f</sup>Complex formed between neutral 3-amino-5-halobenzoic acid and methylguanidinium (Me-gua<sup>+</sup>) cation. Calculation results reveal that all the three cations could form stable halogen bonds with favorable binding energies in solvents.

**Table S24. Calculated atomic charge and charge transfer results from natural population analysis for complexes of the cationic 3-amino-5-halobenzoic acid donors, and neutral and cationic methylguanidine acceptors.<sup>a</sup>**

| Complex                                  | Environment      | $Q_{CT}^b$ | $q(X)_{monomer}^c$ | $q(X)_{complex}^d$ | $\Delta q(X)^e$ | $\Delta Q_{CTX}^f$ |
|------------------------------------------|------------------|------------|--------------------|--------------------|-----------------|--------------------|
| Cl Cation-Neutral<br>Me-gua <sup>h</sup> | TCM <sup>g</sup> | 0.0075     | 0.0558             | 0.0599             | 0.0041          | -0.0116            |
|                                          | DCE              | 0.0069     | 0.0469             | 0.0489             | 0.0020          | -0.0089            |
|                                          | Acetone          | 0.0062     | 0.0427             | 0.0440             | 0.0013          | -0.0075            |
|                                          | DMSO             | 0.0061     | 0.0403             | 0.0415             | 0.0012          | -0.0073            |
|                                          | Water            | 0.0061     | 0.0395             | 0.0405             | 0.0010          | -0.0071            |
| Br Cation-Neutral<br>Me-gua              | TCM              | 0.0135     | 0.1289             | 0.1332             | 0.0043          | -0.0178            |
|                                          | DCE              | 0.0131     | 0.1188             | 0.1228             | 0.0039          | -0.0171            |
|                                          | Acetone          | 0.0121     | 0.1141             | 0.1179             | 0.0038          | -0.0158            |
|                                          | DMSO             | 0.0118     | 0.1113             | 0.1151             | 0.0037          | -0.0156            |
|                                          | Water            | 0.0117     | 0.1105             | 0.1141             | 0.0036          | -0.0153            |
| I Cation-Neutral<br>Me-gua               | TCM              | 0.0283     | 0.2580             | 0.2674             | 0.0094          | -0.0378            |
|                                          | DCE              | 0.0265     | 0.2470             | 0.2569             | 0.0099          | -0.0364            |
|                                          | Acetone          | 0.0268     | 0.2418             | 0.2496             | 0.0079          | -0.0347            |
|                                          | DMSO             | 0.0256     | 0.2388             | 0.2462             | 0.0074          | -0.0331            |
|                                          | Water            | 0.0253     | 0.2378             | 0.2453             | 0.0075          | -0.0329            |
| Cl Cation-Cation<br>Me-gua <sup>+i</sup> | TCM              | 0.0015     | 0.0558             | 0.0298             | -0.0260         | 0.0245             |
|                                          | DCE              | 0.0014     | 0.0469             | 0.0266             | -0.0203         | 0.0190             |
|                                          | Acetone          | 0.0015     | 0.0427             | 0.0267             | -0.0160         | 0.0145             |
|                                          | DMSO             | 0.0016     | 0.0403             | 0.0281             | -0.0121         | 0.0106             |
|                                          | Water            | 0.0016     | 0.0395             | 0.0282             | -0.0113         | 0.0098             |
| Br Cation-Cation                         | TCM              | 0.0034     | 0.1289             | 0.0988             | -0.0301         | 0.0267             |

|                     |         |        |        |        |         |        |
|---------------------|---------|--------|--------|--------|---------|--------|
| Me-gua <sup>+</sup> | DCE     | 0.0040 | 0.1188 | 0.0984 | -0.0204 | 0.0164 |
|                     | Acetone | 0.0033 | 0.1141 | 0.0975 | -0.0166 | 0.0133 |
|                     | DMSO    | 0.0033 | 0.1113 | 0.0981 | -0.0132 | 0.0099 |
|                     | Water   | 0.0033 | 0.1105 | 0.0982 | -0.0123 | 0.0090 |
|                     | TCM     | 0.0066 | 0.2580 | 0.2264 | -0.0316 | 0.0250 |
| I Cation-Cation     | DCE     | 0.0071 | 0.2470 | 0.2265 | -0.0205 | 0.0134 |
|                     | Acetone | 0.0072 | 0.2418 | 0.2265 | -0.0152 | 0.0080 |
| Me-gua <sup>+</sup> | DMSO    | 0.0073 | 0.2388 | 0.2265 | -0.0122 | 0.0050 |
|                     | Water   | 0.0073 | 0.2378 | 0.2265 | -0.0113 | 0.0040 |

<sup>a</sup>All values are in atomic units. <sup>b</sup>Amount of electron transferred from the XB acceptor to donor. <sup>c</sup>Atomic charge of the halogen atom in monomer from natural population analysis (NPA). <sup>d</sup>Atomic charge of the halogen atom in complex from NPA. <sup>e</sup>Difference of *d* and *c*. <sup>f</sup> $\Delta Q_{CTX} = -Q_{CT} - \Delta q(X)$ , negative  $\Delta Q_{CTX}$  value means electron transfer from the halogen atom to the rest of the XB donor molecule, and vice versa. <sup>g</sup>The complex geometry is obtained by constrained optimization. <sup>h</sup>Complex formed between cationic 3-amino-5-halobenzoic acid and neutral methylguanidine (Me-gua) acceptor. <sup>i</sup>Complex formed between cationic 3-amino-5-halobenzoic acid and cationic methylguanidinium (Me-gua<sup>+</sup>) acceptor. Once we switch the cationic glycine XB acceptor to the cationic methylguanidinium ion, negative  $\Delta q(X)$  and positive  $\Delta Q_{CTX}$  values are presented in all cation-cation organohalogen complexes for all various solvents, suggesting the wide existence of intramolecular electron flows from the rest of the donor to the halogen atom in these systems, which simply results from the more positive surface electrostatic potential of methylguanidinium cation. These results further demonstrate the charge state based intramolecular electron redistribution tendencies to be valid.



**Table S25. Calculated atomic charge and charge transfer results in Hirshfeld population analysis for complexes of the cationic 3-amino-5-halobenzoic acid donors, and neutral and cationic methylguanidine acceptors.<sup>a</sup>**

| Complex                                  | Environment      | $Q_{CT}^b$ | $q(X)_{monomer}^c$ | $q(X)_{complex}^d$ | $\Delta q(X)^e$ | $\Delta Q_{CTX}^f$ |
|------------------------------------------|------------------|------------|--------------------|--------------------|-----------------|--------------------|
| Cl Cation-Neutral<br>Me-gua <sup>h</sup> | TCM <sup>g</sup> | 0.0111     | -0.0137            | -0.0089            | 0.0048          | -0.0159            |
|                                          | DCE              | 0.0076     | -0.0222            | -0.0156            | 0.0065          | -0.0141            |
|                                          | Acetone          | 0.0030     | -0.0262            | -0.0171            | 0.0092          | -0.0122            |
|                                          | DMSO             | 0.0031     | -0.0285            | -0.0206            | 0.0080          | -0.0111            |
|                                          | Water            | 0.0029     | -0.0293            | -0.0213            | 0.0080          | -0.0109            |
| Br Cation-Neutral<br>Me-gua              | TCM              | 0.0251     | 0.0118             | 0.0087             | -0.0032         | -0.0219            |
|                                          | DCE              | 0.0212     | 0.0023             | 0.0018             | -0.0006         | -0.0206            |
|                                          | Acetone          | 0.0184     | -0.0022            | -0.0014            | 0.0008          | -0.0192            |
|                                          | DMSO             | 0.0188     | -0.0048            | -0.0050            | -0.0001         | -0.0187            |
|                                          | Water            | 0.0176     | -0.0057            | -0.0051            | 0.0006          | -0.0182            |
| I Cation-Neutral<br>Me-gua               | TCM              | 0.0554     | 0.0627             | 0.0486             | -0.0141         | -0.0413            |
|                                          | DCE              | 0.0507     | 0.0523             | 0.0408             | -0.0115         | -0.0392            |
|                                          | Acetone          | 0.0470     | 0.0474             | 0.0375             | -0.0099         | -0.0371            |
|                                          | DMSO             | 0.0426     | 0.0445             | 0.0374             | -0.0071         | -0.0355            |
|                                          | Water            | 0.0420     | 0.0436             | 0.0368             | -0.0068         | -0.0352            |
| Cl Cation-Cation<br>Me-gua <sup>+i</sup> | TCM              | -0.0177    | -0.0137            | -0.0176            | -0.0038         | 0.0215             |
|                                          | DCE              | -0.0189    | -0.0222            | -0.0187            | 0.0035          | 0.0154             |
|                                          | Acetone          | -0.0192    | -0.0262            | -0.0182            | 0.0081          | 0.0112             |
|                                          | DMSO             | -0.0217    | -0.0285            | -0.0145            | 0.0140          | 0.0077             |
|                                          | Water            | -0.0222    | -0.0293            | -0.0140            | 0.0152          | 0.0069             |
| Br Cation-Cation                         | TCM              | -0.0111    | 0.0118             | 0.0000             | -0.0118         | 0.0230             |

|                                        |         |         |         |        |         |        |
|----------------------------------------|---------|---------|---------|--------|---------|--------|
| Me-gua <sup>+</sup>                    | DCE     | -0.0113 | 0.0023  | 0.0005 | -0.0018 | 0.0131 |
|                                        | Acetone | -0.0146 | -0.0022 | 0.0025 | 0.0048  | 0.0098 |
|                                        | DMSO    | -0.0166 | -0.0048 | 0.0050 | 0.0098  | 0.0068 |
|                                        | Water   | -0.0169 | -0.0057 | 0.0054 | 0.0110  | 0.0059 |
|                                        | TCM     | -0.0052 | 0.0627  | 0.0467 | -0.0160 | 0.0212 |
| I Cation-Cation<br>Me-gua <sup>+</sup> | DCE     | -0.0043 | 0.0523  | 0.0462 | -0.0061 | 0.0104 |
|                                        | Acetone | -0.0038 | 0.0474  | 0.0459 | -0.0014 | 0.0053 |
|                                        | DMSO    | -0.0036 | 0.0445  | 0.0458 | 0.0012  | 0.0024 |
|                                        | Water   | -0.0036 | 0.0436  | 0.0457 | 0.0021  | 0.0015 |
|                                        |         |         |         |        |         |        |

<sup>a</sup>All values are in atomic units. <sup>b</sup>Amount of electron transferred from the XB acceptor to donor. <sup>c</sup>Atomic charge of the halogen atom in monomer from Hirshfeld population analysis (HPA). <sup>d</sup>Atomic charge of the halogen atom in complex from HPA. <sup>e</sup>Difference of *d* and *c*. <sup>f</sup> $\Delta Q_{CTX} = -Q_{CT} - \Delta q(X)$ , negative  $\Delta Q_{CTX}$  value means electron transfer from the halogen atom to the rest of the XB donor molecule, and vice versa. <sup>g</sup>The complex geometry is obtained by constrained optimization. <sup>h</sup>Complex formed between cationic 3-amino-5-halobenzoic acid and neutral methylguanidine (Me-gua) acceptor. <sup>i</sup>Complex formed between cationic 3-amino-5-halobenzoic acid and cationic methylguanidinium (Me-gua<sup>+</sup>) acceptor.

**Table S26. Products and characteristics of the electron transfer reaction according to the Marcus theory with differently charged glycine and neutral and cationic methylguanidine as electron donors, and differently charged 3-amino-5-bromobenzoic acid as electron acceptors.<sup>a</sup>**

| Complex            | Reactants <sup>b</sup>                | Products <sup>c</sup>                                                                        | Environment | $\Delta G^{\circ d}$ | $\lambda^e$ | $w_p^f$ | $\Delta G^*^g$ |
|--------------------|---------------------------------------|----------------------------------------------------------------------------------------------|-------------|----------------------|-------------|---------|----------------|
| Br Cation-Anion    | R-Br <sup>+</sup><br>Gly <sup>-</sup> | R-Br·<br>CH <sub>2</sub> NH <sub>2</sub> ·<br>CO <sub>2</sub>                                | TCM         | 34.61                | 202.45      | -8.74   | 64.38          |
|                    |                                       |                                                                                              | DCE         | 47.55                | 207.14      | -4.07   | 75.81          |
|                    |                                       |                                                                                              | Acetone     | 53.23                | 211.78      | -2.01   | 81.66          |
|                    |                                       |                                                                                              | DMSO        | 56.35                | 209.60      | -0.88   | 83.81          |
|                    |                                       |                                                                                              | Water       | 57.33                | 214.31      | -0.53   | 85.74          |
| Br Neutral-Anion   | R-Br<br>Gly <sup>-</sup>              | [R-Br·] <sup>-</sup><br>CH <sub>2</sub> NH <sub>2</sub> ·<br>CO <sub>2</sub>                 | TCM         | 60.20                | 192.20      | 0.00    | 82.86          |
|                    |                                       |                                                                                              | DCE         | 63.53                | 192.14      | 0.00    | 85.05          |
|                    |                                       |                                                                                              | Acetone     | 65.02                | 192.09      | 0.00    | 86.03          |
|                    |                                       |                                                                                              | DMSO        | 65.83                | 192.17      | 0.00    | 86.60          |
|                    |                                       |                                                                                              | Water       | 66.09                | 192.07      | 0.00    | 86.75          |
| Br Anion-Anion     | R-Br <sup>-</sup><br>Gly <sup>-</sup> | [R·] <sup>-</sup><br>Br <sup>-</sup><br>CH <sub>2</sub> NH <sub>2</sub> ·<br>CO <sub>2</sub> | TCM         | 52.85                | 182.96      | -2.83   | 74.17          |
|                    |                                       |                                                                                              | DCE         | 53.37                | 178.17      | -1.32   | 74.37          |
|                    |                                       |                                                                                              | Acetone     | 53.64                | 173.46      | -0.65   | 73.91          |
|                    |                                       |                                                                                              | DMSO        | 53.80                | 175.80      | -0.28   | 74.78          |
|                    |                                       |                                                                                              | Water       | 53.86                | 170.95      | -0.17   | 73.80          |
| Br Cation-Neutral  | R-Br <sup>+</sup><br>Gly              | R-Br·<br>[Gly·] <sup>+</sup>                                                                 | TCM         | 77.50                | 118.38      | 0.00    | 81.03          |
|                    |                                       |                                                                                              | DCE         | 72.27                | 118.34      | 0.00    | 76.76          |
|                    |                                       |                                                                                              | Acetone     | 69.88                | 118.29      | 0.00    | 74.83          |
|                    |                                       |                                                                                              | DMSO        | 68.54                | 118.31      | 0.00    | 73.77          |
|                    |                                       |                                                                                              | Water       | 68.12                | 118.26      | 0.00    | 73.43          |
| Br Neutral-Neutral | R-Br                                  | [R-Br·] <sup>-</sup>                                                                         | TCM         | 103.09               | 118.92      | 8.77    | 111.96         |

|                   |                   |                      |                  |        |        |       |        |
|-------------------|-------------------|----------------------|------------------|--------|--------|-------|--------|
|                   | Gly               | [Gly·] <sup>+</sup>  | DCE              | 88.26  | 118.92 | 4.08  | 93.83  |
|                   |                   |                      | Acetone          | 81.66  | 118.92 | 2.02  | 86.29  |
|                   |                   |                      | DMSO             | 78.02  | 118.92 | 0.88  | 82.27  |
|                   |                   |                      | Water            | 76.88  | 118.92 | 0.53  | 81.03  |
|                   |                   |                      | TCM <sup>h</sup> | 95.74  | 120.66 | 10.64 | 106.80 |
| Br Anion-Neutral  | R-Br <sup>-</sup> | [R·] <sup>-</sup>    | DCE <sup>h</sup> | 78.09  | 120.70 | 4.95  | 85.98  |
|                   |                   | Br <sup>-</sup>      | Acetone          | 70.29  | 120.74 | 2.45  | 77.50  |
|                   | Gly               | [Gly·] <sup>+</sup>  | DMSO             | 65.99  | 120.72 | 1.07  | 73.02  |
|                   |                   |                      | Water            | 64.64  | 120.76 | 0.64  | 71.65  |
|                   |                   |                      | TCM              | 131.01 | 100.54 | 8.79  | 143.63 |
| Br Cation-Cation  | R-Br <sup>+</sup> | R-Br·                | DCE              | 113.18 | 95.69  | 4.09  | 118.48 |
|                   |                   |                      | Acetone          | 105.26 | 90.92  | 2.02  | 108.02 |
|                   | Gly <sup>+</sup>  | [Gly·] <sup>2+</sup> | DMSO             | 100.89 | 93.29  | 0.88  | 101.97 |
|                   |                   |                      | Water            | 99.52  | 88.38  | 0.53  | 100.43 |
|                   |                   |                      | TCM              | 156.60 | 112.30 | 17.56 | 182.67 |
| Br Neutral-Cation | R-Br              | [R-Br·] <sup>-</sup> | DCE              | 129.16 | 112.34 | 8.17  | 138.72 |
|                   |                   |                      | Acetone          | 117.04 | 112.38 | 4.04  | 121.24 |
|                   | Gly <sup>+</sup>  | [Gly·] <sup>2+</sup> | DMSO             | 110.37 | 112.37 | 1.77  | 112.14 |
|                   |                   |                      | Water            | 108.28 | 112.40 | 1.06  | 109.36 |
|                   |                   |                      | TCM              | 149.25 | 125.27 | 24.13 | 178.00 |
| Br Anion-Cation   | R-Br <sup>-</sup> | [R·] <sup>-</sup>    | DCE              | 118.99 | 130.16 | 0.88  | 120.08 |
|                   |                   | Br <sup>-</sup>      | Acetone          | 105.66 | 134.98 | 0.44  | 107.64 |
|                   | Gly <sup>+</sup>  | [Gly·] <sup>2+</sup> | DMSO             | 98.34  | 132.59 | 0.19  | 100.72 |
|                   |                   |                      | Water            | 96.05  | 137.57 | 0.11  | 99.28  |
| Br Cation-Neutral | R-Br <sup>+</sup> | R-Br·                | TCM              | 61.78  | 101.95 | 0.00  | 65.73  |

|                      |                     |                         |         |        |        |      |        |
|----------------------|---------------------|-------------------------|---------|--------|--------|------|--------|
| Me-gua <sup>i</sup>  | Me-gua              | [Me-gua·] <sup>+</sup>  | DCE     | 59.14  | 101.89 | 0.00 | 63.62  |
|                      |                     |                         | Acetone | 57.93  | 101.85 | 0.00 | 62.67  |
|                      |                     |                         | DMSO    | 57.25  | 101.89 | 0.00 | 62.14  |
|                      |                     |                         | Water   | 57.04  | 101.83 | 0.00 | 61.96  |
|                      |                     |                         | TCM     | 105.10 | 85.59  | 8.67 | 116.09 |
| Br Cation-Cation     | R-Br <sup>+</sup>   | R-Br·                   | DCE     | 86.20  | 80.84  | 4.04 | 90.50  |
|                      |                     |                         | Acetone | 77.80  | 76.16  | 1.99 | 79.84  |
| Me-gua <sup>+j</sup> | Me-gua <sup>+</sup> | [Me-gua·] <sup>2+</sup> | DMSO    | 73.17  | 78.49  | 0.87 | 74.10  |
|                      |                     |                         | Water   | 71.71  | 73.67  | 0.52 | 72.24  |

<sup>a</sup>All values are in kcal/mol. <sup>b</sup>Reactants of the electron transfer reaction, R and Gly refer to the 3-amino-benzoic acid and glycine groups respectively with different charge states. <sup>c</sup>Products of the electron transfer reaction, all free radical and ionic products are labeled properly. <sup>d</sup>The free energy that drives the electron transfer reaction in solvents. <sup>e</sup>The total reorganization energy that has considered the contribution of the carbon-halogen bond dissociation energies<sup>21, 24</sup>, which are 81.73, 82.14, 83.81 kcal/mol for cationic, neutral and anionic 3-amino-5-bromobenzoic acid respectively. Intramolecular reorganization energies of electron donors are 30.10, 36.78, 110.30, 20.37, 14.94 kcal/mol for cationic, neutral, anionic glycine and neutral, cationic methylguanidine respectively. <sup>f</sup>The work term of bring the ionic reactants and products together, evaluated via the Coulomb formula. <sup>g</sup>The outer-sphere electron transfer activation barrier from the Marcus theory. <sup>h</sup>The complex geometry is obtained by constrained optimization. <sup>i</sup>Complex formed between cationic 3-amino-5-bromobenzoic acid and neutral methylguanidine (Me-gua) acceptor. <sup>j</sup>Complex formed between cationic 3-amino-5-bromobenzoic acid and cationic methylguanidinium (Me-gua<sup>+</sup>) acceptor.

**Table S27. Calculated binding energies in solvents for halogen-bonded complexes between differently charged 3-amino-5-halobenzoic acid and glycine with the IEFPCM model using UA0 radii.<sup>a</sup>**

| Environment | Cation-Anion  |        |        | Cation-Neutral  |       |       | Cation-Cation  |       |       |
|-------------|---------------|--------|--------|-----------------|-------|-------|----------------|-------|-------|
|             | Cl            | Br     | I      | Cl              | Br    | I     | Cl             | Br    | I     |
| TCM         | -10.57        | -12.73 | -17.29 | -1.83           | -2.76 | -4.32 | 4.64           | 4.01  | 3.03  |
| DCE         | -4.91         | -6.67  | -10.39 | -1.16           | -2.04 | -3.45 | 1.75           | 1.11  | 0.22  |
| Acetone     | -2.73         | -4.31  | -7.56  | -0.90           | -1.73 | -3.07 | 0.54           | -0.07 | -1.02 |
| DMSO        | -1.60         | -3.09  | -6.07  | -0.76           | -1.56 | -2.87 | -0.11          | -0.71 | -1.65 |
| Water       | -1.25         | -2.69  | -5.61  | -0.72           | -1.51 | -2.80 | -0.31          | -0.91 | -1.85 |
| Environment | Neutral-Anion |        |        | Neutral-Neutral |       |       | Neutral-Cation |       |       |
|             | Cl            | Br     | I      | Cl              | Br    | I     | Cl             | Br    | I     |
| TCM         | 0.32          | -1.39  | -4.75  | -0.24           | -0.88 | -2.10 | -0.84          | -1.31 | -1.96 |
| DCE         | 0.26          | -1.08  | -3.74  | -0.29           | -0.89 | -1.99 | -0.63          | -1.05 | -1.77 |
| Acetone     | 0.07          | -1.12  | -3.45  | -0.33           | -0.92 | -1.97 | -0.54          | -0.97 | -1.68 |
| DMSO        | -0.07         | -1.18  | -3.34  | -0.36           | -0.95 | -1.96 | -0.49          | -0.91 | -1.62 |
| Water       | -0.14         | -1.19  | -3.31  | -0.37           | -0.96 | -1.96 | -0.48          | -0.89 | -1.60 |
| Environment | Anion-Anion   |        |        | Anion-Neutral   |       |       | Anion-Cation   |       |       |
|             | Cl            | Br     | I      | Cl              | Br    | I     | Cl             | Br    | I     |
| TCM         | 8.08          | 7.00   | 4.34   | 0.97            | 0.36  | -0.73 | -6.01          | -6.37 | -6.75 |
| DCE         | 4.04          | 2.93   | 0.76   | 0.40            | -0.18 | -1.06 | -2.88          | -3.24 | -3.75 |
| Acetone     | 2.03          | 1.04   | -0.90  | 0.08            | -0.46 | -1.33 | -1.56          | -1.92 | -2.50 |
| DMSO        | 0.86          | 0.00   | -1.81  | -0.12           | -0.62 | -1.46 | -0.87          | -1.26 | -1.82 |
| Water       | 0.52          | -0.33  | -2.10  | -0.18           | -0.67 | -1.50 | -0.66          | -1.03 | -1.61 |

<sup>a</sup>All values are in kcal/mol. The binding energies are obtained based on single-point energy calculations utilizing the structures optimized with the IEFPCM model using the default UFF radii.

**Table S28. Calculated binding energies in solvents for halogen-bonded complexes between differently charged 3-amino-5-halobenzoic acid and glycine with the IEFPCM model using UAHF radii.<sup>a</sup>**

| Environment | Cation-Anion  |        |        | Cation-Neutral  |       |       | Cation-Cation  |       |       |
|-------------|---------------|--------|--------|-----------------|-------|-------|----------------|-------|-------|
|             | Cl            | Br     | I      | Cl              | Br    | I     | Cl             | Br    | I     |
| TCM         | -9.13         | -10.70 | -13.75 | -1.55           | -2.46 | -4.07 | 4.55           | 3.87  | 2.70  |
| DCE         | -3.54         | -4.65  | -6.87  | -0.81           | -1.62 | -3.05 | 1.84           | 1.19  | 0.10  |
| Acetone     | -1.50         | -2.42  | -4.28  | -0.51           | -1.26 | -2.59 | 0.72           | 0.12  | -1.01 |
| DMSO        | -0.46         | -1.26  | -2.87  | -0.37           | -1.08 | -2.34 | 0.14           | -0.46 | -1.56 |
| Water       | -0.15         | -0.93  | -2.45  | -0.32           | -1.03 | -2.27 | -0.05          | -0.64 | -1.73 |
| Environment | Neutral-Anion |        |        | Neutral-Neutral |       |       | Neutral-Cation |       |       |
|             | Cl            | Br     | I      | Cl              | Br    | I     | Cl             | Br    | I     |
| TCM         | 1.25          | 0.05   | -2.48  | -0.02           | -0.62 | -1.89 | -0.73          | -1.25 | -2.04 |
| DCE         | 0.92          | 0.26   | -1.47  | -0.04           | -0.59 | -1.70 | -0.47          | -0.93 | -1.78 |
| Acetone     | 0.59          | 0.15   | -1.23  | -0.09           | -0.61 | -1.64 | -0.36          | -0.81 | -1.64 |
| DMSO        | 0.46          | -0.09  | -1.15  | -0.12           | -0.66 | -1.62 | -0.30          | -0.72 | -1.56 |
| Water       | 0.24          | -0.01  | -1.13  | -0.13           | -0.66 | -1.59 | -0.28          | -0.69 | -1.53 |
| Environment | Anion-Anion   |        |        | Anion-Neutral   |       |       | Anion-Cation   |       |       |
|             | Cl            | Br     | I      | Cl              | Br    | I     | Cl             | Br    | I     |
| TCM         | 8.27          | 7.67   | 5.72   | 1.16            | 0.54  | -0.61 | -5.74          | -6.15 | -6.64 |
| DCE         | 4.33          | 3.57   | 2.31   | 0.58            | 0.02  | -0.87 | -2.67          | -3.06 | -3.70 |
| Acetone     | 2.29          | 1.75   | 0.74   | 0.26            | -0.26 | -1.12 | -1.37          | -1.76 | -2.46 |
| DMSO        | 0.97          | 0.71   | -0.12  | 0.06            | -0.42 | -1.24 | -0.70          | -1.13 | -1.78 |
| Water       | 0.67          | 0.39   | -0.40  | -0.03           | -0.47 | -1.26 | -0.50          | -0.91 | -1.58 |

<sup>a</sup>All values are in kcal/mol. The binding energies are obtained based on single-point energy calculations utilizing the structures optimized with the IEFPCM model using the default UFF radii.

**Table S29. Calculated binding energies in solvents for halogen-bonded complexes between differently charged 3-amino-5-halobenzoic acid and glycine with the IEFPCM model using UAKS radii.<sup>a</sup>**

| Environment | Cation-Anion  |        |        | Cation-Neutral  |       |       | Cation-Cation  |       |       |
|-------------|---------------|--------|--------|-----------------|-------|-------|----------------|-------|-------|
|             | Cl            | Br     | I      | Cl              | Br    | I     | Cl             | Br    | I     |
| TCM         | -9.14         | -10.71 | -13.76 | -1.47           | -2.35 | -3.92 | 4.61           | 3.95  | 2.79  |
| DCE         | -3.54         | -4.66  | -6.89  | -0.70           | -1.48 | -2.87 | 1.90           | 1.28  | 0.22  |
| Acetone     | -1.51         | -2.43  | -4.29  | -0.40           | -1.11 | -2.40 | 0.80           | 0.22  | -0.87 |
| DMSO        | -0.46         | -1.26  | -2.88  | -0.26           | -0.95 | -2.14 | 0.21           | -0.35 | -1.41 |
| Water       | -0.15         | -0.93  | -2.45  | -0.21           | -0.89 | -2.06 | 0.02           | -0.53 | -1.57 |
| Environment | Neutral-Anion |        |        | Neutral-Neutral |       |       | Neutral-Cation |       |       |
|             | Cl            | Br     | I      | Cl              | Br    | I     | Cl             | Br    | I     |
| TCM         | 1.26          | 0.08   | -2.45  | 0.05            | -0.51 | -1.75 | -0.70          | -1.20 | -1.96 |
| DCE         | 0.94          | 0.28   | -1.44  | 0.03            | -0.45 | -1.54 | -0.43          | -0.86 | -1.67 |
| Acetone     | 0.61          | 0.17   | -1.20  | -0.01           | -0.48 | -1.45 | -0.31          | -0.72 | -1.51 |
| DMSO        | 0.47          | -0.08  | -1.12  | -0.04           | -0.55 | -1.41 | -0.25          | -0.62 | -1.40 |
| Water       | 0.25          | 0.01   | -1.10  | -0.05           | -0.55 | -1.39 | -0.23          | -0.59 | -1.37 |
| Environment | Anion-Anion   |        |        | Anion-Neutral   |       |       | Anion-Cation   |       |       |
|             | Cl            | Br     | I      | Cl              | Br    | I     | Cl             | Br    | I     |
| TCM         | 8.29          | 7.70   | 5.76   | 1.20            | 0.61  | -0.51 | -5.74          | -6.13 | -6.60 |
| DCE         | 4.35          | 3.59   | 2.35   | 0.62            | 0.10  | -0.70 | -2.63          | -3.01 | -3.61 |
| Acetone     | 2.31          | 1.77   | 0.77   | 0.31            | -0.17 | -0.94 | -1.33          | -1.69 | -2.34 |
| DMSO        | 0.99          | 0.73   | -0.09  | 0.11            | -0.33 | -1.05 | -0.67          | -1.07 | -1.65 |
| Water       | 0.68          | 0.40   | -0.37  | 0.04            | -0.38 | -1.07 | -0.46          | -0.83 | -1.44 |

<sup>a</sup>All values are in kcal/mol. The binding energies are obtained based on single-point energy calculations utilizing the structures optimized with the IEFPCM model using the default UFF radii.



#### 4. References

1. (a) F. C. Bernstein, T. F. Koetzle, G. J. Williams, E. F. Meyer, Jr., M. D. Brice, J. R. Rodgers, O. Kennard, T. Shimanouchi, M. Tasumi, *J. Mol. Biol.*, 1977, **112**, 535-542; (b) H. M. Berman, J. Westbrook, Z. Feng, G. Gilliland, T. N. Bhat, H. Weissig, I. N. Shindyalov, P. E. Bourne, *Nucleic Acids Res.*, 2000, **28**, 235-242.
2. (a) Schrödinger Release 2015-4: *Epik, version 3.4*, Schrödinger, LLC: New York, 2015; (b) J. C. Shelley, A. Cholleti, L. L. Frye, J. R. Greenwood, M. R. Timlin, M. Uchimaya, *J. Comput. Aid. Mol. Des.*, 2007, **21**, 681-691.
3. M. J. Frisch, G. W. Trucks, H. B. Schlegel, G. E. Scuseria, M. A. Robb, J. R. Cheeseman, G. Scalmani, V. Barone, B. Mennucci, G. A. Petersson, H. Nakatsuji, M. Caricato, X. Li, H. P. Hratchian, A. F. Izmaylov, J. Bloino, G. Zheng, J. L. Sonnenberg, M. Hada, M. Ehara, K. Toyota, R. Fukuda, J. Hasegawa, M. Ishida, T. Nakajima, Y. Honda, O. Kitao, H. Nakai, T. Vreven, J. A. Montgomery, Jr., J. E. Peralta, F. Ogliaro, M. Bearpark, J. J. Heyd, E. Brothers, K. N. Kudin, V. N. Staroverov, T. Keith, R. Kobayashi, J. Normand, K. Raghavachari, A. Rendell, J. C. Burant, S. S. Iyengar, J. Tomasi, M. Cossi, N. Rega, J. M. Millam, M. Klene, J. E. Knox, J. B. Cross, V. Bakken, C. Adamo, J. Jaramillo, R. Gomperts, R. E. Stratmann, O. Yazyev, A. J. Austin, R. Cammi, C. Pomelli, J. W. Ochterski, R. L. Martin, K. Morokuma, V. G. Zakrzewski, G. A. Voth, P. Salvador, J. J. Dannenberg, S. Dapprich, A. D. Daniels, O. Farkas, J. B. Foresman, J. V. Ortiz, J. Cioslowski, D. J. Fox, *Gaussian 09, Revision C.01.*, Gaussian, Inc.: Wallingford, CT, 2009.
4. Y. Zhao, D. G. Truhlar, *Theor. Chem. Acc.*, 2008, **120**, 215-241.
5. (a) S. Miertus, E. Scrocco, J. Tomasi, *Chem. Phys.* 1981, **55**, 117-129; (b) E. Cancès, B. Mennucci, J. Tomasi, *J. Chem. Phys.*, 1997, **107**, 3032-3041; (c) B. Mennucci, R. Cammi, J. Tomasi, *J. Chem. Phys.*, 1998, **109**, 2798-2807.
6. J. Tomasi, B. Mennucci, R. Cammi, *Chem. Rev.*, 2005, **105**, 2999-3093.
7. S. F. Boys, F. Bernardi, *Mol. Phys.*, 1970, **19**, 553-566.
8. (a) C. F. Guerra, J. G. Snijders, G. te Velde, E. J. Baerends, *Theor. Chem. Acc.*, 1998, **99**, 391-403; (b) G. te Velde, F. M. Bickelhaupt, E. J. Baerends, C. F. Guerra, S. J. A. Van Gisbergen, J. G. Snijders, T.

- Ziegler, *J. Comput. Chem.*, 2001, **22**, 931-967.
9. J. P. Perdew, K. Burke, M. Ernzerhof, *Phys. Rev. Lett.*, 1996, **77**, 3865-3868.
  10. S. Grimme, J. Antony, S. Ehrlich, H. Krieg, *J. Chem. Phys.*, 2010, **132**, 154104.
  11. S. Grimme, S. Ehrlich, L. Goerigk, *J. Comput. Chem.*, 2011, **32**, 1456-1465.
  12. A. Klamt, G. Schuurmann, *J. Chem. Soc., Perkin Tran. 2*, 1993, **5**, 799-805.
  13. A. Klamt, C. Moya, J. Palomar, *J. Chem. Theory Comput.*, 2015, **11**, 4220-4225.
  14. (a) R. F. W. Bader *Atoms in Molecules - A Quantum Theory*, Oxford University: London, 1994; (b) R. F. W. Bader, *J. Phys. Chem. A*, 1998, **102**, 7314-7323.
  15. T. Lu, F. W. Chen, *J. Comput. Chem.*, 2012, **33**, 580-592.
  16. (a) L. Maugeri, J. Asencio-Hernandez, T. Lebl, D. B. Cordes, A. M. Z. Slawin, M. A. Delsuc, D. Philp, *Chem. Sci.*, 2016, **7**, 6422-6428; (b) B. Pinter, N. Nagels, W. A. Herrebout, F. De Proft, *Chem. Eur. J.*, 2013, **19**, 518-529.
  17. E. R. Johnson, S. Keinan, P. Mori-Sánchez, J. Contreras-García, A. J. Cohen, W. Yang, *J. Am. Chem. Soc.*, 2010, **132**, 6498-6506.
  18. F. L. Hirshfeld, *Theor. Chim. Acta.*, 1977, **44**, 129-138.
  19. (a) I. Alkorta, I. Mata, E. Molins, E. Espinosa, *Chem. Eur. J.*, 2016, **22**, 9226-9234; (b) D. Quiñero, I. Alkorta, J. Elguero, *Phys. Chem. Chem. Phys.*, 2016, **18**, 27939-27950.
  20. (a) R. A. Marcus, N. Sutin, *Biochim. Biophys. Acta.*, 1985, **811**, 265-322; (b) B. S. Brunshwig, N. Sutin, *Coord. Chem. Rev.*, 1999, **187**, 233-254.
  21. S. V. Rosokha, M. K. Vinakos, *Phys. Chem. Chem. Phys.*, 2014, **16**, 1809-1813.
  22. (a) L. A. Curtiss, P. C. Redfern, K. Raghavachari, *J. Chem. Phys.*, 2007, **126**, 084108; (b) L. A. Curtiss, P. C. Redfern, K. Raghavachari, *J. Chem. Phys.*, 2007, **127**, 124105.
  23. A. A. Isse, C. Y. Lin, M. L. Coote, A. Gennaro, *J. Phys. Chem. B*, 2011, **115**, 678-684.
  24. (a) J. M. Saveant, *Acc. Chem. Res.*, 1993, **26**, 455-461; (b) A. Cardinale, A. A. Isse, A. Gennaro, M. Robert, J. M. Saveant, *J. Am. Chem. Soc.*, 2002, **124**, 13533-13539.
  25. R. A. Marcus, *Angew. Chem. Int. Ed.*, 1993, **32**, 1111-1121.
  26. W. Humphrey, A. Dalke, K. Schulten, *J. Mol. Graph. Model.*, 1996, **14**, 33-38.

27. D. J. Duarte, G. L. Sosa, N. M. Peruchena, *J. Mol. Model.*, 2013, **19**, 2035-2041.
28. (a) A. J. Stone, *J. Am. Chem. Soc.*, 2013, **135**, 7005-7009; (b) A. El Kerdawy, J. S. Murray, P. Politzer, P. Bleiziffer, A. Heßelmann, A. Görling, T. Clark, *J. Chem. Theory Comput.*, 2013, **9**, 2264-2275; (c) R. Sedlak, M. H. Kolar, P. Hobza, *J. Chem. Theory Comput.*, 2015, **11**, 4727-4732.

## 5. Cartesian Coordinates of All Optimized Geometries.

Detailed Cartesian coordinates of all optimized geometries in this research are listed below. Constraint optimization and single-point energy calculation cases are labeled with “ModRedundant” and “SP” in the title of the Cartesian coordinates, respectively. Information for the fixed plane angles and dihedral angles in constraint optimizations are provided in the corresponding annotations as their original formats in the input gif files. For instance, “A 7 10 15 120.0 F” refers to fix the angle among atoms with serial number of 7, 10 and 12 to 120.0°, while A stands for “angle”. Similarly, “D 15 10 7 4 0.0 F” refers to fix the dihedral angle among atoms with serial number of 15, 10, 7 and 4 to 0.0°, while D stands for “dihedral”.

|                                                    |            |            |             |                                                 |            |            |             |
|----------------------------------------------------|------------|------------|-------------|-------------------------------------------------|------------|------------|-------------|
| <b>HOOC-phCl-NH<sub>3</sub><sup>+</sup> Vacuum</b> |            |            |             | H                                               | 7.65511300 | 5.81545500 | -0.64147200 |
| C                                                  | 2.23311200 | 4.50590500 | -0.53109700 | H                                               | 1.51516200 | 8.43406600 | -0.01101900 |
| C                                                  | 3.60184500 | 4.24902400 | -0.52797800 |                                                 |            |            |             |
| C                                                  | 4.50138200 | 5.30451400 | -0.59599700 |                                                 |            |            |             |
| C                                                  | 4.05686500 | 6.62409200 | -0.66862400 |                                                 |            |            |             |
| C                                                  | 2.69259800 | 6.83164200 | -0.66988300 |                                                 |            |            |             |
| C                                                  | 1.75792700 | 5.81115200 | -0.60349200 |                                                 |            |            |             |
| H                                                  | 3.97771700 | 3.23362300 | -0.47149100 |                                                 |            |            |             |
| H                                                  | 4.77477900 | 7.43522300 | -0.72150900 |                                                 |            |            |             |
| H                                                  | 0.69016900 | 6.00137400 | -0.60564900 |                                                 |            |            |             |
| Cl                                                 | 1.10974100 | 3.20654000 | -0.44224300 |                                                 |            |            |             |
| N                                                  | 2.18712300 | 8.22889900 | -0.75885300 |                                                 |            |            |             |
| H                                                  | 2.95796700 | 8.89912800 | -0.67206400 |                                                 |            |            |             |
| H                                                  | 1.72324900 | 8.40597000 | -1.65734000 |                                                 |            |            |             |
| C                                                  | 5.96734500 | 4.97610500 | -0.58825700 |                                                 |            |            |             |
| O                                                  | 6.38891000 | 3.86131800 | -0.53342000 |                                                 |            |            |             |
| O                                                  | 6.72313800 | 6.07949900 | -0.65003800 |                                                 |            |            |             |
|                                                    |            |            |             | <b>HOOC-phCl-NH<sub>3</sub><sup>+</sup> TCM</b> |            |            |             |
|                                                    |            |            |             | C                                               | 2.24212500 | 4.51283000 | -0.44670300 |
|                                                    |            |            |             | C                                               | 3.60285500 | 4.24769700 | -0.48278000 |
|                                                    |            |            |             | C                                               | 4.49937600 | 5.30482900 | -0.60719200 |
|                                                    |            |            |             | C                                               | 4.05133000 | 6.61891200 | -0.69677300 |
|                                                    |            |            |             | C                                               | 2.68605200 | 6.83692200 | -0.65850700 |
|                                                    |            |            |             | C                                               | 1.76160600 | 5.81531600 | -0.53384900 |
|                                                    |            |            |             | H                                               | 3.97558400 | 3.23304900 | -0.41695700 |
|                                                    |            |            |             | H                                               | 4.75655500 | 7.43536100 | -0.79409600 |
|                                                    |            |            |             | H                                               | 0.69573300 | 6.00695000 | -0.50535600 |
|                                                    |            |            |             | Cl                                              | 1.11241400 | 3.21042500 | -0.29575400 |
|                                                    |            |            |             | N                                               | 2.19587000 | 8.22706100 | -0.76023300 |
|                                                    |            |            |             | H                                               | 2.55227800 | 8.80889200 | 0.00572000  |
|                                                    |            |            |             | H                                               | 2.48461000 | 8.66453800 | -1.64226200 |

|   |            |            |             |
|---|------------|------------|-------------|
| C | 5.96035500 | 4.97880100 | -0.64597200 |
| O | 6.39381800 | 3.86275300 | -0.56876400 |
| O | 6.72037100 | 6.06915700 | -0.77723900 |
| H | 7.65003700 | 5.79816800 | -0.79983900 |
| H | 1.17317600 | 8.27186500 | -0.72387100 |

**HOOC-phCl-NH<sub>3</sub><sup>+</sup> DCE**

|    |            |            |             |
|----|------------|------------|-------------|
| C  | 2.24325800 | 4.51386000 | -0.44665400 |
| C  | 3.60296400 | 4.24694300 | -0.48275200 |
| C  | 4.49942500 | 5.30444300 | -0.60683300 |
| C  | 4.05095400 | 6.61826500 | -0.69600600 |
| C  | 2.68564700 | 6.83821000 | -0.65829400 |
| C  | 1.76198700 | 5.81571500 | -0.53369600 |
| H  | 3.97428900 | 3.23197100 | -0.41738100 |
| H  | 4.75484800 | 7.43559200 | -0.79264000 |
| H  | 0.69640100 | 6.00821000 | -0.50533100 |
| Cl | 1.11255700 | 3.20923100 | -0.29531800 |
| N  | 2.19633900 | 8.22617800 | -0.76035800 |
| H  | 2.55147900 | 8.80886000 | 0.00542300  |
| H  | 2.48542600 | 8.66396700 | -1.64199600 |
| C  | 5.95957800 | 4.97977200 | -0.64617500 |
| O  | 6.39534000 | 3.86287300 | -0.56945100 |
| O  | 6.71994900 | 6.06865400 | -0.77730900 |
| H  | 7.64985700 | 5.79847200 | -0.80052700 |
| H  | 1.17384300 | 8.27231000 | -0.72512800 |

**HOOC-phCl-NH<sub>3</sub><sup>+</sup> Acetone**

|    |            |            |             |
|----|------------|------------|-------------|
| C  | 2.24391100 | 4.51443700 | -0.44564900 |
| C  | 3.60300700 | 4.24657800 | -0.48216400 |
| C  | 4.49947600 | 5.30426000 | -0.60713800 |
| C  | 4.05081700 | 6.61783400 | -0.69661200 |
| C  | 2.68541900 | 6.83884900 | -0.65873100 |
| C  | 1.76226000 | 5.81604100 | -0.53324700 |
| H  | 3.97379400 | 3.23152900 | -0.41657900 |
| H  | 4.75395400 | 7.43562600 | -0.79343300 |
| H  | 0.69679400 | 6.00888900 | -0.50454700 |
| Cl | 1.11255400 | 3.20901300 | -0.29273000 |
| N  | 2.19654600 | 8.22581600 | -0.76042000 |
| H  | 2.54455900 | 8.80645300 | 0.01014000  |
| H  | 2.49245300 | 8.66686200 | -1.63810000 |
| C  | 5.95922000 | 4.98022900 | -0.64719900 |
| O  | 6.39589700 | 3.86270400 | -0.57164600 |
| O  | 6.71978800 | 6.06831900 | -0.77742100 |
| H  | 7.64981900 | 5.79856200 | -0.80123400 |
| H  | 1.17387200 | 8.27152500 | -0.73371800 |

**HOOC-phCl-NH<sub>3</sub><sup>+</sup> DMSO**

|   |            |            |             |
|---|------------|------------|-------------|
| C | 2.24427100 | 4.51492600 | -0.44400800 |
| C | 3.60309200 | 4.24650300 | -0.48109700 |
| C | 4.49951400 | 5.30411000 | -0.60742600 |
| C | 4.05071700 | 6.61758800 | -0.69763200 |
| C | 2.68537600 | 6.83914000 | -0.65945900 |
| C | 1.76240300 | 5.81626600 | -0.53252600 |
| H | 3.97344700 | 3.23137800 | -0.41500000 |

|    |            |            |             |   |            |            |             |
|----|------------|------------|-------------|---|------------|------------|-------------|
| H  | 4.75342100 | 7.43556400 | -0.79506200 | O | 6.39636900 | 3.86251900 | -0.57312000 |
| H  | 0.69706900 | 6.00953200 | -0.50323700 | O | 6.71944300 | 6.06775400 | -0.78101700 |
| Cl | 1.11276300 | 3.20901700 | -0.28890000 | H | 7.64957300 | 5.79839100 | -0.80589400 |
| N  | 2.19671100 | 8.22555900 | -0.76039600 | H | 1.17375900 | 8.26930000 | -0.75923400 |
| H  | 2.53113200 | 8.80163800 | 0.01955800  |   |            |            |             |
| H  | 2.50602700 | 8.67297500 | -1.63015800 |   |            |            |             |
| C  | 5.95898100 | 4.98033900 | -0.64839800 |   |            |            |             |
| O  | 6.39625900 | 3.86256500 | -0.57265200 |   |            |            |             |
| O  | 6.71955300 | 6.06792100 | -0.77970600 |   |            |            |             |
| H  | 7.64966000 | 5.79846300 | -0.80426500 |   |            |            |             |
| H  | 1.17374700 | 8.27004600 | -0.75006400 |   |            |            |             |

**HOOC-phCl-NH<sub>3</sub><sup>+</sup> Water**

|    |            |            |             |
|----|------------|------------|-------------|
| C  | 2.24440500 | 4.51511300 | -0.44306500 |
| C  | 3.60312500 | 4.24649400 | -0.48049400 |
| C  | 4.49951800 | 5.30405200 | -0.60764000 |
| C  | 4.05065700 | 6.61746900 | -0.69828400 |
| C  | 2.68534000 | 6.83920900 | -0.65986400 |
| C  | 1.76244900 | 5.81635400 | -0.53209800 |
| H  | 3.97336200 | 3.23136200 | -0.41408500 |
| H  | 4.75317000 | 7.43551300 | -0.79617600 |
| H  | 0.69716500 | 6.00976800 | -0.50246200 |
| Cl | 1.11285300 | 3.20909300 | -0.28681000 |
| N  | 2.19678500 | 8.22548200 | -0.76037300 |
| H  | 2.52359100 | 8.79885400 | 0.02480300  |
| H  | 2.51368700 | 8.67643400 | -1.62554800 |
| C  | 5.95889100 | 4.98036400 | -0.64906400 |

**HOOC-phBr-NH<sub>3</sub><sup>+</sup> Vacuum**

|    |            |            |             |
|----|------------|------------|-------------|
| C  | 2.23873000 | 4.51004900 | -0.40894600 |
| C  | 3.60425800 | 4.25292900 | -0.46171800 |
| C  | 4.50059500 | 5.30556300 | -0.61902800 |
| C  | 4.05503900 | 6.62006000 | -0.72594500 |
| C  | 2.69029000 | 6.82930000 | -0.66938500 |
| C  | 1.76214500 | 5.81510300 | -0.51380800 |
| H  | 3.98870700 | 3.24244100 | -0.38517900 |
| H  | 4.76804400 | 7.42768600 | -0.84812500 |
| H  | 0.69596500 | 6.00976600 | -0.47350200 |
| N  | 2.19016300 | 8.22932800 | -0.75414800 |
| H  | 2.24465500 | 8.70724800 | 0.15314700  |
| H  | 2.73444300 | 8.77560100 | -1.43039600 |
| C  | 5.96484700 | 4.97334400 | -0.67522400 |
| O  | 6.38719800 | 3.85985400 | -0.60059200 |
| O  | 6.71784500 | 6.07115100 | -0.81741700 |
| H  | 7.64826000 | 5.80383400 | -0.85038400 |
| H  | 1.21175700 | 8.25290900 | -1.05966300 |
| Br | 1.01236200 | 3.10536700 | -0.19638500 |

**HOOC-phBr-NH<sub>3</sub><sup>+</sup> TCM**

|   |            |            |             |
|---|------------|------------|-------------|
| C | 2.24090400 | 4.51161100 | -0.44738100 |
|---|------------|------------|-------------|

|    |            |            |             |    |            |            |             |
|----|------------|------------|-------------|----|------------|------------|-------------|
| C  | 3.60199300 | 4.24717800 | -0.48507300 | H  | 0.69681500 | 6.01311000 | -0.50854800 |
| C  | 4.49923100 | 5.30451600 | -0.61051700 | N  | 2.19686800 | 8.22631600 | -0.76035400 |
| C  | 4.05123200 | 6.61841300 | -0.69911000 | H  | 2.54919000 | 8.80596600 | 0.00905800  |
| C  | 2.68588700 | 6.83651100 | -0.66140800 | H  | 2.48906300 | 8.66751200 | -1.63924700 |
| C  | 1.76102900 | 5.81476600 | -0.53674500 | C  | 5.95958800 | 4.97955200 | -0.64885400 |
| H  | 3.97934600 | 3.23455500 | -0.41815600 | O  | 6.39530900 | 3.86220300 | -0.57842200 |
| H  | 4.75646400 | 7.43508400 | -0.79493800 | O  | 6.71999300 | 6.06941200 | -0.77082500 |
| H  | 0.69594100 | 6.01173100 | -0.50928100 | H  | 7.65010000 | 5.79986700 | -0.79325000 |
| N  | 2.19641900 | 8.22728300 | -0.76007500 | H  | 1.17424500 | 8.27222600 | -0.72849300 |
| H  | 2.55047800 | 8.80605200 | 0.00932300  | Br | 1.00963300 | 3.09348700 | -0.26683200 |
| H  | 2.48795000 | 8.66812700 | -1.63948700 |    |            |            |             |
| C  | 5.96032400 | 4.97861100 | -0.64841700 |    |            |            |             |
| O  | 6.39370700 | 3.86216300 | -0.57650900 |    |            |            |             |
| O  | 6.72053200 | 6.06975400 | -0.77162100 |    |            |            |             |
| H  | 7.65032400 | 5.79916100 | -0.79334800 |    |            |            |             |
| H  | 1.17361700 | 8.27201500 | -0.72661600 |    |            |            |             |
| Br | 1.00992300 | 3.09400400 | -0.26733600 |    |            |            |             |

**HOOC-phBr-NH<sub>3</sub><sup>+</sup> DCE**

|   |            |            |             |
|---|------------|------------|-------------|
| C | 2.24210600 | 4.51263200 | -0.44719700 |
| C | 3.60214600 | 4.24622200 | -0.48503400 |
| C | 4.49926700 | 5.30397900 | -0.61028600 |
| C | 4.05089800 | 6.61763700 | -0.69853400 |
| C | 2.68557300 | 6.83779700 | -0.66115200 |
| C | 1.76152600 | 5.81519600 | -0.53629900 |
| H | 3.97814900 | 3.23328200 | -0.41853600 |
| H | 4.75483400 | 7.43513700 | -0.79389300 |

**HOOC-phBr-NH<sub>3</sub><sup>+</sup> Acetone**

|   |            |            |             |
|---|------------|------------|-------------|
| C | 2.24280800 | 4.51328800 | -0.44566200 |
| C | 3.60226500 | 4.24585600 | -0.48406300 |
| C | 4.49932700 | 5.30374200 | -0.61058700 |
| C | 4.05079000 | 6.61718700 | -0.69956800 |
| C | 2.68545000 | 6.83838200 | -0.66189700 |
| C | 1.76188700 | 5.81557200 | -0.53551600 |
| H | 3.97768200 | 3.23282200 | -0.41712900 |
| H | 4.75405400 | 7.43503500 | -0.79536000 |
| H | 0.69737900 | 6.01395700 | -0.50690100 |
| N | 2.19702800 | 8.22585100 | -0.76037800 |
| H | 2.53590600 | 8.80128200 | 0.01817600  |
| H | 2.50217600 | 8.67331200 | -1.63162000 |
| C | 5.95923100 | 4.97990900 | -0.65004800 |
| O | 6.39597900 | 3.86209100 | -0.57975400 |
| O | 6.71977100 | 6.06893700 | -0.77274100 |

|    |            |            |             |   |            |            |             |
|----|------------|------------|-------------|---|------------|------------|-------------|
| H  | 7.65001000 | 5.79985100 | -0.79592300 | C | 4.49935900 | 5.30343300 | -0.61114700 |
| H  | 1.17407500 | 8.27063900 | -0.74461000 | C | 4.05062900 | 6.61673700 | -0.70161700 |
| Br | 1.00948600 | 3.09382000 | -0.26311700 | C | 2.68544800 | 6.83870900 | -0.66308300 |

**HOOC-phBr-NH<sub>3</sub><sup>+</sup> DMSO**

|    |            |            |             |    |            |            |             |
|----|------------|------------|-------------|----|------------|------------|-------------|
| C  | 2.24320200 | 4.51382900 | -0.44350300 | C  | 1.76213900 | 5.81590100 | -0.53404600 |
| C  | 3.60238300 | 4.24574200 | -0.48258900 | H  | 3.97729900 | 3.23259300 | -0.41406800 |
| C  | 4.49935700 | 5.30351900 | -0.61094900 | H  | 4.75325300 | 7.43479500 | -0.79894800 |
| C  | 4.05069300 | 6.61687600 | -0.70095700 | H  | 0.69787200 | 6.01496600 | -0.50429900 |
| C  | 2.68546900 | 6.83864400 | -0.66273800 | N  | 2.19726700 | 8.22544200 | -0.76030300 |
| C  | 1.76208900 | 5.81582400 | -0.53447500 | H  | 2.51113500 | 8.79225700 | 0.03491200  |
| H  | 3.97738200 | 3.23263900 | -0.41497500 | H  | 2.52690100 | 8.68429200 | -1.61649100 |
| H  | 4.75350900 | 7.43486900 | -0.79778800 | C  | 5.95891200 | 4.98001800 | -0.65216800 |
| H  | 0.69776200 | 6.01472500 | -0.50505800 | O  | 6.39657000 | 3.86193500 | -0.58140200 |
| N  | 2.19719100 | 8.22553000 | -0.76034100 | O  | 6.71931000 | 6.06842700 | -0.77684400 |
| H  | 2.51829700 | 8.79490400 | 0.03013100  | H  | 7.64968100 | 5.79986000 | -0.80130500 |
| H  | 2.51972700 | 8.68113300 | -1.62098500 | H  | 1.17427400 | 8.26811600 | -0.77443400 |
| C  | 5.95899100 | 4.97998500 | -0.65155000 | Br | 1.00950200 | 3.09434400 | -0.25679000 |
| O  | 6.39642600 | 3.86196900 | -0.58092800 |    |            |            |             |
| O  | 6.71944200 | 6.06855300 | -0.77568200 |    |            |            |             |
| H  | 7.64977600 | 5.79984200 | -0.79982500 |    |            |            |             |
| H  | 1.17412000 | 8.26875000 | -0.76583800 |    |            |            |             |
| Br | 1.00948800 | 3.09420200 | -0.25864700 |    |            |            |             |

**HOOC-phI-NH<sub>3</sub><sup>+</sup> Vacuum**

**HOOC-phBr-NH<sub>3</sub><sup>+</sup> Water**

|   |            |            |             |   |            |            |             |
|---|------------|------------|-------------|---|------------|------------|-------------|
| C | 2.24333200 | 4.51400400 | -0.44265100 | C | 2.23992900 | 4.51621600 | -0.35025800 |
| C | 3.60242100 | 4.24570400 | -0.48201400 | C | 3.60673700 | 4.25924100 | -0.43826100 |
|   |            |            |             | C | 4.50174600 | 5.30529200 | -0.63042600 |
|   |            |            |             | C | 4.05457400 | 6.62079400 | -0.73886500 |
|   |            |            |             | C | 2.69440700 | 6.83319000 | -0.64757700 |
|   |            |            |             | C | 1.76688700 | 5.82053000 | -0.45641900 |
|   |            |            |             | H | 3.99789100 | 3.25127500 | -0.35959900 |
|   |            |            |             | H | 4.76717300 | 7.42452000 | -0.88855400 |
|   |            |            |             | H | 0.70455300 | 6.03103000 | -0.39074400 |







I 0.86100800 2.92150700 -0.23659000

**HOOC-phCl-NH<sub>2</sub> Vacuum**

C 2.27201100 4.56623000 -0.53113300

C 3.61960700 4.24692500 -0.53702000

C 4.53221000 5.29868000 -0.58597400

C 4.11566500 6.62342100 -0.62847000

C 2.75007200 6.92578300 -0.62334200

C 1.82500000 5.87836000 -0.57153500

H 3.96554300 3.22269900 -0.50582400

H 4.84977600 7.41881500 -0.66231100

H 0.76147200 6.08507400 -0.55921200

Cl 1.09062100 3.28458800 -0.47377800

N 2.31706100 8.24569400 -0.61134100

H 2.97264000 8.92571900 -0.96453800

H 1.37631100 8.40575400 -0.93719300

C 5.98095900 4.94647200 -0.59319300

O 6.41231100 3.82679400 -0.55789100

O 6.78359300 6.02769200 -0.64497600

H 7.69375800 5.70377500 -0.64334700

**HOOC-phCl-NH<sub>2</sub> TCM**

C 2.27367900 4.56758500 -0.53112100

C 3.62048900 4.24518400 -0.53407600

C 4.53356100 5.29770300 -0.58496200

C 4.11642300 6.62227900 -0.62996900

C 2.74942300 6.92739200 -0.62462000

C 1.82366300 5.87806600 -0.57403800

H 3.96225700 3.21979700 -0.50021300

H 4.84812700 7.41942300 -0.66766100

H 0.76054100 6.08658400 -0.56740500

Cl 1.09136100 3.28152600 -0.47481400

N 2.31797900 8.24385600 -0.60975000

H 2.97034400 8.92642300 -0.96671100

H 1.37413100 8.40530800 -0.92880400

C 5.98341800 4.94832300 -0.59074300

O 6.41205300 3.82382500 -0.54755500

O 6.78212000 6.02393400 -0.65011600

H 7.69904100 5.71526700 -0.64852100

**HOOC-phCl-NH<sub>2</sub> DCE**

C 2.28009500 4.58163600 -0.37617700

C 3.62433500 4.25399900 -0.43551700

C 4.53130000 5.29360800 -0.63856000

C 4.11038100 6.61007000 -0.78043600

C 2.74546700 6.92034500 -0.72082100

C 1.82584700 5.88395800 -0.51467000

H 3.96879500 3.23474700 -0.32817000

H 4.83682600 7.39711300 -0.93896100

H 0.76483800 6.09710200 -0.46492500

Cl 1.10858700 3.31150600 -0.11504000

N 2.30522000 8.21776800 -0.92203000

H 1.38975100 8.43682000 -0.55720300

H 2.97968900 8.94616200 -0.73803000

|   |            |            |             |
|---|------------|------------|-------------|
| C | 5.97869800 | 4.93853000 | -0.69906200 |
| O | 6.40784200 | 3.81772600 | -0.58944400 |
| O | 6.77226700 | 6.00049100 | -0.89024300 |
| H | 7.68867400 | 5.69089600 | -0.92178700 |

**HOOC-phCl-NH<sub>2</sub> Acetone**

|    |            |            |             |
|----|------------|------------|-------------|
| C  | 2.27356500 | 4.56851600 | -0.53247100 |
| C  | 3.62001900 | 4.24494200 | -0.53478500 |
| C  | 4.53390900 | 5.29746100 | -0.58466800 |
| C  | 4.11702500 | 6.62204400 | -0.62889800 |
| C  | 2.74943500 | 6.92825300 | -0.62383900 |
| C  | 1.82301800 | 5.87883900 | -0.57475300 |
| H  | 3.96009200 | 3.21900300 | -0.50165500 |
| H  | 4.84775000 | 7.42009700 | -0.66675000 |
| H  | 0.76014900 | 6.08853300 | -0.57020500 |
| Cl | 1.09063900 | 3.28144900 | -0.47784200 |
| N  | 2.31917300 | 8.24408400 | -0.60622200 |
| H  | 2.97122400 | 8.92596400 | -0.96619500 |
| H  | 1.37538000 | 8.40570800 | -0.92671600 |
| C  | 5.98398400 | 4.94802600 | -0.59037600 |
| O  | 6.41052700 | 3.82136100 | -0.54691200 |
| O  | 6.78191000 | 6.02120400 | -0.64951500 |
| H  | 7.70081200 | 5.71698900 | -0.64927700 |

**HOOC-phCl-NH<sub>2</sub> DMSO**

|   |            |            |             |
|---|------------|------------|-------------|
| C | 2.27351200 | 4.56878900 | -0.53269400 |
| C | 3.62018700 | 4.24484600 | -0.53525900 |

|    |            |            |             |
|----|------------|------------|-------------|
| C  | 4.53394000 | 5.29720000 | -0.58477100 |
| C  | 4.11715100 | 6.62215300 | -0.62843100 |
| C  | 2.74971700 | 6.92852100 | -0.62294400 |
| C  | 1.82296600 | 5.87877500 | -0.57430900 |
| H  | 3.95982100 | 3.21876600 | -0.50291600 |
| H  | 4.84800000 | 7.42006100 | -0.66668100 |
| H  | 0.76023000 | 6.08907800 | -0.56985500 |
| Cl | 1.09072800 | 3.28112900 | -0.47923000 |
| N  | 2.31884000 | 8.24375300 | -0.60546500 |
| H  | 2.97094200 | 8.92659500 | -0.96353200 |
| H  | 1.37508900 | 8.40518000 | -0.92623100 |
| C  | 5.98416200 | 4.94808000 | -0.59077100 |
| O  | 6.41052300 | 3.82103800 | -0.54744500 |
| O  | 6.78175000 | 6.02089600 | -0.64991100 |
| H  | 7.70105200 | 5.71761700 | -0.65063000 |

**HOOC-phCl-NH<sub>2</sub> Water**

|    |            |            |             |
|----|------------|------------|-------------|
| C  | 2.27360600 | 4.56870200 | -0.53195700 |
| C  | 3.62015100 | 4.24493800 | -0.53423800 |
| C  | 4.53400000 | 5.29744500 | -0.58442100 |
| C  | 4.11710300 | 6.62213400 | -0.62906500 |
| C  | 2.74945600 | 6.92843200 | -0.62369200 |
| C  | 1.82287000 | 5.87880500 | -0.57430300 |
| H  | 3.95990400 | 3.21890300 | -0.50107200 |
| H  | 4.84764800 | 7.42030300 | -0.66802100 |
| H  | 0.76007300 | 6.08882300 | -0.56975000 |
| Cl | 1.09079400 | 3.28114400 | -0.47745600 |

|   |            |            |             |
|---|------------|------------|-------------|
| N | 2.31900100 | 8.24385400 | -0.60633400 |
| H | 2.97112300 | 8.92578500 | -0.96629200 |
| H | 1.37538900 | 8.40516400 | -0.92776400 |
| C | 5.98418200 | 4.94821400 | -0.59003900 |
| O | 6.41044300 | 3.82114300 | -0.54505100 |
| O | 6.78173200 | 6.02086900 | -0.65078200 |
| H | 7.70113500 | 5.71781800 | -0.65084000 |

**HOOC-phBr-NH<sub>2</sub> Vacuum**

|    |            |            |             |
|----|------------|------------|-------------|
| C  | 2.27867600 | 4.57844400 | -0.37726800 |
| C  | 3.62447900 | 4.25528300 | -0.43228400 |
| C  | 4.53030400 | 5.29490300 | -0.63597700 |
| C  | 4.10911200 | 6.61093000 | -0.78023500 |
| C  | 2.74620700 | 6.91769000 | -0.72005700 |
| C  | 1.82693400 | 5.88225300 | -0.51818300 |
| H  | 3.97906600 | 3.23954000 | -0.32419100 |
| H  | 4.83825400 | 7.39491700 | -0.94340700 |
| H  | 0.76564500 | 6.09681600 | -0.47726700 |
| N  | 2.30391200 | 8.21980300 | -0.91680000 |
| H  | 1.39097500 | 8.43718500 | -0.54783500 |
| H  | 2.98040100 | 8.94511500 | -0.73455000 |
| C  | 5.97681900 | 4.93784100 | -0.69634800 |
| O  | 6.41133700 | 3.82474100 | -0.58148300 |
| O  | 6.77318000 | 6.00616800 | -0.89742100 |
| H  | 7.68183900 | 5.67936600 | -0.92722000 |
| Br | 1.00263100 | 3.19948800 | -0.10682200 |

**HOOC-phBr-NH<sub>2</sub> TCM**

|    |            |            |             |
|----|------------|------------|-------------|
| C  | 2.27256900 | 4.56790900 | -0.52980200 |
| C  | 3.61942600 | 4.24504400 | -0.53813500 |
| C  | 4.53329000 | 5.29732900 | -0.59143900 |
| C  | 4.11645200 | 6.62181600 | -0.63447800 |
| C  | 2.74968800 | 6.92761600 | -0.62779300 |
| C  | 1.82239400 | 5.87879600 | -0.57433600 |
| H  | 3.96510400 | 3.22127700 | -0.50322700 |
| H  | 4.84834100 | 7.41892900 | -0.67107100 |
| H  | 0.76053600 | 6.09364700 | -0.56437500 |
| N  | 2.31979500 | 8.24451100 | -0.61106300 |
| H  | 2.97227300 | 8.92691700 | -0.96815500 |
| H  | 1.37531900 | 8.40772900 | -0.92732200 |
| C  | 5.98297900 | 4.94652500 | -0.59637800 |
| O  | 6.41011300 | 3.82109000 | -0.56594600 |
| O  | 6.78265600 | 6.02207900 | -0.63758200 |
| H  | 7.69937000 | 5.71276100 | -0.63554900 |
| Br | 0.98946300 | 3.16651300 | -0.44069800 |

**HOOC-phBr-NH<sub>2</sub> DCE**

|   |            |            |             |
|---|------------|------------|-------------|
| C | 2.28020600 | 4.58039900 | -0.37688000 |
| C | 3.62488000 | 4.25334200 | -0.43280600 |
| C | 4.53190000 | 5.29387900 | -0.63494200 |
| C | 4.11048300 | 6.60985500 | -0.77839200 |
| C | 2.74558000 | 6.91987500 | -0.72028200 |
| C | 1.82531300 | 5.88301100 | -0.51581900 |
| H | 3.97425000 | 3.23591500 | -0.32576500 |

|    |            |            |             |
|----|------------|------------|-------------|
| H  | 4.83673000 | 7.39705400 | -0.93720500 |
| H  | 0.76509900 | 6.10114700 | -0.46978700 |
| N  | 2.30522100 | 8.21696800 | -0.92281800 |
| H  | 1.38855800 | 8.43569800 | -0.56081200 |
| H  | 2.97873200 | 8.94599700 | -0.73779300 |
| C  | 5.97953000 | 4.93923000 | -0.69561900 |
| O  | 6.40959100 | 3.81953300 | -0.57926600 |
| O  | 6.77180400 | 6.00047600 | -0.89613400 |
| H  | 7.68839100 | 5.69143700 | -0.92797700 |
| Br | 1.00350300 | 3.19666800 | -0.10505200 |

**HOOC-phBr-NH<sub>2</sub> Acetone**

|   |            |            |             |
|---|------------|------------|-------------|
| C | 2.27989400 | 4.58084500 | -0.37835000 |
| C | 3.62455400 | 4.25316200 | -0.43443400 |
| C | 4.53194800 | 5.29361300 | -0.63560700 |
| C | 4.11080800 | 6.60989000 | -0.77809600 |
| C | 2.74590600 | 6.92038600 | -0.71971900 |
| C | 1.82507400 | 5.88350000 | -0.51614500 |
| H | 3.97309100 | 3.23540300 | -0.32797500 |
| H | 4.83704100 | 7.39728900 | -0.93572600 |
| H | 0.76510400 | 6.10255900 | -0.46927200 |
| N | 2.30583500 | 8.21756100 | -0.92158100 |
| H | 1.38962100 | 8.43557000 | -0.55755700 |
| H | 2.97922600 | 8.94593200 | -0.73273400 |
| C | 5.97951900 | 4.93879600 | -0.69676900 |
| O | 6.40885800 | 3.81809000 | -0.58240300 |
| O | 6.77154700 | 5.99940800 | -0.89570400 |

|    |            |            |             |
|----|------------|------------|-------------|
| H  | 7.68876800 | 5.69179200 | -0.92808000 |
| Br | 1.00297800 | 3.19668800 | -0.10719700 |

**HOOC-phBr-NH<sub>2</sub> DMSO**

|    |            |            |             |
|----|------------|------------|-------------|
| C  | 2.28023000 | 4.58073400 | -0.37702600 |
| C  | 3.62489500 | 4.25309600 | -0.43395500 |
| C  | 4.53202900 | 5.29369200 | -0.63610800 |
| C  | 4.11065000 | 6.60990200 | -0.77837900 |
| C  | 2.74566300 | 6.92041700 | -0.71891100 |
| C  | 1.82502500 | 5.88321800 | -0.51467500 |
| H  | 3.97349900 | 3.23539000 | -0.32740000 |
| H  | 4.83657700 | 7.39750800 | -0.93648800 |
| H  | 0.76509900 | 6.10232600 | -0.46723900 |
| N  | 2.30543900 | 8.21719300 | -0.91996400 |
| H  | 1.38902400 | 8.43512100 | -0.55623800 |
| H  | 2.97895800 | 8.94591500 | -0.73261300 |
| C  | 5.97984100 | 4.93922700 | -0.69819900 |
| O  | 6.40917300 | 3.81859400 | -0.58100000 |
| O  | 6.77112600 | 5.99914500 | -0.90107100 |
| H  | 7.68887600 | 5.69285200 | -0.93311000 |
| Br | 1.00366800 | 3.19615200 | -0.10497400 |

**HOOC-phBr-NH<sub>2</sub> Water**

|   |            |            |             |
|---|------------|------------|-------------|
| C | 2.28018400 | 4.58056100 | -0.37849400 |
| C | 3.62495800 | 4.25302800 | -0.43438300 |
| C | 4.53214900 | 5.29374600 | -0.63564700 |
| C | 4.11075100 | 6.60996300 | -0.77802400 |

|    |            |            |             |
|----|------------|------------|-------------|
| C  | 2.74566600 | 6.92037900 | -0.71957100 |
| C  | 1.82493800 | 5.88299200 | -0.51626200 |
| H  | 3.97341600 | 3.23530600 | -0.32765900 |
| H  | 4.83672600 | 7.39767900 | -0.93534400 |
| H  | 0.76498800 | 6.10211600 | -0.46950200 |
| N  | 2.30537800 | 8.21698700 | -0.92076400 |
| H  | 1.38843400 | 8.43460300 | -0.55813400 |
| H  | 2.97843300 | 8.94596100 | -0.73266600 |
| C  | 5.98008400 | 4.93952500 | -0.69648800 |
| O  | 6.40940800 | 3.81880900 | -0.57915600 |
| O  | 6.77135400 | 5.99949000 | -0.89823500 |
| H  | 7.68929400 | 5.69359700 | -0.92966700 |
| Br | 1.00361200 | 3.19574100 | -0.10735100 |

**HOOC-phI-NH<sub>2</sub> Vacuum**

|   |            |            |             |
|---|------------|------------|-------------|
| C | 2.27734700 | 4.57764000 | -0.38439800 |
| C | 3.62365700 | 4.25544300 | -0.43811600 |
| C | 4.53113900 | 5.29550400 | -0.63755300 |
| C | 4.11116900 | 6.61194100 | -0.77925000 |
| C | 2.74873800 | 6.91909200 | -0.72090700 |
| C | 1.82842000 | 5.88273100 | -0.52319100 |
| H | 3.98513400 | 3.24179800 | -0.33247700 |
| H | 4.84107300 | 7.39602300 | -0.93882000 |
| H | 0.76891300 | 6.10625800 | -0.48488800 |
| N | 2.30686600 | 8.22209100 | -0.91451000 |
| H | 1.39298000 | 8.43799800 | -0.54695400 |
| H | 2.98267400 | 8.94660500 | -0.72645300 |

|   |            |            |             |
|---|------------|------------|-------------|
| C | 5.97764200 | 4.93811200 | -0.69548800 |
| O | 6.41188400 | 3.82448900 | -0.58383300 |
| O | 6.77482400 | 6.00717800 | -0.89018800 |
| H | 7.68349600 | 5.68029400 | -0.91821900 |
| I | 0.84861900 | 3.03542900 | -0.08471400 |

**HOOC-phI-NH<sub>2</sub> TCM**

|   |            |            |             |
|---|------------|------------|-------------|
| C | 2.27884800 | 4.57845100 | -0.38142200 |
| C | 3.62466000 | 4.25388900 | -0.43809700 |
| C | 4.53250700 | 5.29484800 | -0.63739500 |
| C | 4.11179000 | 6.61129000 | -0.77800300 |
| C | 2.74788200 | 6.92050700 | -0.71985800 |
| C | 1.82735500 | 5.88267000 | -0.51814600 |
| H | 3.98204500 | 3.23882000 | -0.33439200 |
| H | 4.83893900 | 7.39807800 | -0.93544100 |
| H | 0.76874600 | 6.10875800 | -0.47389100 |
| N | 2.30676500 | 8.21922100 | -0.91867400 |
| H | 1.39026700 | 8.43627900 | -0.55577800 |
| H | 2.98002300 | 8.94732500 | -0.73017900 |
| C | 5.97999300 | 4.94004800 | -0.69776600 |
| O | 6.41135600 | 3.82111400 | -0.58698100 |
| O | 6.77352500 | 6.00380900 | -0.89149200 |
| H | 7.68872500 | 5.69161800 | -0.92329400 |
| I | 0.85114900 | 3.03190100 | -0.07915100 |

**HOOC-phI-NH<sub>2</sub> DCE**

|   |            |            |             |
|---|------------|------------|-------------|
| C | 2.27867400 | 4.57902500 | -0.38112200 |
|---|------------|------------|-------------|

|   |            |            |             |   |            |            |             |
|---|------------|------------|-------------|---|------------|------------|-------------|
| C | 3.62435500 | 4.25360900 | -0.43831800 | N | 2.32056600 | 8.24499100 | -0.60964400 |
| C | 4.53269800 | 5.29445300 | -0.63770700 | H | 2.97053800 | 8.92649500 | -0.97416300 |
| C | 4.11229100 | 6.61104800 | -0.77819800 | H | 1.37546700 | 8.40548400 | -0.92688000 |
| C | 2.74809700 | 6.92114200 | -0.71981400 | C | 5.98507600 | 4.94894500 | -0.59758900 |
| C | 1.82714100 | 5.88324700 | -0.51739100 | O | 6.41179500 | 3.82177800 | -0.57114900 |
| H | 3.98059700 | 3.23818400 | -0.33464200 | O | 6.78338400 | 6.02304800 | -0.63319900 |
| H | 4.83912500 | 7.39824200 | -0.93486900 | H | 7.70223600 | 5.71867500 | -0.63241700 |
| H | 0.76889600 | 6.11059000 | -0.47148100 | I | 0.83817700 | 2.99930800 | -0.41998800 |
| N | 2.30753400 | 8.21908000 | -0.91941500 |   |            |            |             |
| H | 1.39048100 | 8.43599900 | -0.55712900 |   |            |            |             |
| H | 2.98041200 | 8.94743400 | -0.72925400 |   |            |            |             |
| C | 5.98031500 | 4.93980500 | -0.69811500 |   |            |            |             |
| O | 6.41070400 | 3.81972200 | -0.58567300 |   |            |            |             |
| O | 6.77298000 | 6.00191500 | -0.89351000 |   |            |            |             |
| H | 7.68960300 | 5.69297700 | -0.92533700 |   |            |            |             |
| I | 0.85067100 | 3.03215600 | -0.07798400 |   |            |            |             |

**HOOC-phI-NH<sub>2</sub> Acetone**

|   |            |            |             |
|---|------------|------------|-------------|
| C | 2.27211700 | 4.56691700 | -0.52805900 |
| C | 3.62027400 | 4.24572900 | -0.53783300 |
| C | 4.53495300 | 5.29854000 | -0.59234900 |
| C | 4.11825200 | 6.62322700 | -0.63521000 |
| C | 2.75157200 | 6.92898600 | -0.62763000 |
| C | 1.82399900 | 5.87845700 | -0.57293400 |
| H | 3.97276500 | 3.22412900 | -0.50340000 |
| H | 4.84918200 | 7.42119400 | -0.67363900 |
| H | 0.76422000 | 6.10272400 | -0.56387500 |

**HOOC-phI-NH<sub>2</sub> DMSO**

|   |            |            |             |
|---|------------|------------|-------------|
| C | 2.27212400 | 4.56695100 | -0.52797500 |
| C | 3.62030400 | 4.24570500 | -0.53756100 |
| C | 4.53503400 | 5.29854800 | -0.59214300 |
| C | 4.11830200 | 6.62322800 | -0.63529000 |
| C | 2.75150600 | 6.92908900 | -0.62763900 |
| C | 1.82388700 | 5.87844300 | -0.57283900 |
| H | 3.97255000 | 3.22403700 | -0.50311300 |
| H | 4.84900500 | 7.42137400 | -0.67440800 |
| H | 0.76415300 | 6.10286300 | -0.56393900 |
| N | 2.32051700 | 8.24482000 | -0.60969300 |
| H | 2.97067900 | 8.92656500 | -0.97359000 |
| H | 1.37550300 | 8.40541600 | -0.92734100 |
| C | 5.98524100 | 4.94905200 | -0.59738100 |
| O | 6.41165200 | 3.82151600 | -0.57068300 |
| O | 6.78332100 | 6.02273300 | -0.63318400 |
| H | 7.70254700 | 5.71921700 | -0.63281800 |
| I | 0.83825100 | 2.99906900 | -0.42036000 |



**HOOC-phI-NH<sub>2</sub> Water**

|   |            |            |             |
|---|------------|------------|-------------|
| C | 2.27212000 | 4.56697600 | -0.52793400 |
| C | 3.62030600 | 4.24570100 | -0.53751400 |
| C | 4.53505900 | 5.29855200 | -0.59210900 |
| C | 4.11832500 | 6.62323600 | -0.63529300 |
| C | 2.75148900 | 6.92912900 | -0.62763200 |
| C | 1.82384400 | 5.87845000 | -0.57279000 |
| H | 3.97247400 | 3.22400700 | -0.50309000 |
| H | 4.84896000 | 7.42144100 | -0.67456200 |
| H | 0.76412400 | 6.10292700 | -0.56392900 |
| N | 2.32052400 | 8.24479200 | -0.60967700 |
| H | 2.97069300 | 8.92652100 | -0.97365500 |
| H | 1.37552500 | 8.40537300 | -0.92744900 |
| C | 5.98529700 | 4.94907900 | -0.59734900 |
| O | 6.41161000 | 3.82141500 | -0.57069700 |
| O | 6.78330900 | 6.02262900 | -0.63305100 |
| H | 7.70265600 | 5.71939000 | -0.63283000 |
| I | 0.83826000 | 2.99900900 | -0.42039800 |

**<sup>-</sup>OOC-phCl-NH<sub>2</sub> Vacuum**

|   |            |            |             |
|---|------------|------------|-------------|
| C | 2.26314300 | 4.57062700 | -0.53319500 |
| C | 3.60752100 | 4.24853000 | -0.52920000 |
| C | 4.53779400 | 5.28972200 | -0.55612700 |
| C | 4.09991800 | 6.60707700 | -0.58618900 |
| C | 2.73880200 | 6.91408300 | -0.59299800 |
| C | 1.80159200 | 5.88059300 | -0.56092900 |

|    |            |            |             |
|----|------------|------------|-------------|
| H  | 3.96668900 | 3.22757200 | -0.50992700 |
| H  | 4.85815900 | 7.38391300 | -0.61095700 |
| H  | 0.73813000 | 6.08912800 | -0.55154600 |
| Cl | 1.05840000 | 3.27855700 | -0.50431000 |
| N  | 2.30227300 | 8.25793000 | -0.58144400 |
| H  | 3.00995500 | 8.89208900 | -0.92583800 |
| H  | 1.43445500 | 8.39799800 | -1.07994700 |
| C  | 6.06552200 | 4.97698100 | -0.56712300 |
| O  | 6.35073300 | 3.76737600 | -0.54006800 |
| O  | 6.80068800 | 5.98055700 | -0.60413900 |

**<sup>-</sup>OOC-phCl-NH<sub>2</sub> TCM**

|    |            |            |             |
|----|------------|------------|-------------|
| C  | 2.26500600 | 4.57190900 | -0.53406400 |
| C  | 3.61048300 | 4.24635200 | -0.52571700 |
| C  | 4.54005900 | 5.28758300 | -0.56023900 |
| C  | 4.10740100 | 6.60632600 | -0.59887400 |
| C  | 2.74401100 | 6.91944900 | -0.60796200 |
| C  | 1.80792400 | 5.88144600 | -0.57310800 |
| H  | 3.95206800 | 3.22042200 | -0.49611800 |
| H  | 4.85515800 | 7.39082900 | -0.62549200 |
| H  | 0.74517800 | 6.09257500 | -0.57453300 |
| Cl | 1.06968100 | 3.28073000 | -0.49794100 |
| N  | 2.31711700 | 8.25148100 | -0.59239700 |
| H  | 2.99369200 | 8.90492300 | -0.96174900 |
| H  | 1.40327700 | 8.40563700 | -0.99502700 |
| C  | 6.05132800 | 4.97455200 | -0.56239200 |
| O  | 6.35803500 | 3.76483600 | -0.53600800 |

|                                                    |            |            |             |                                                 |            |            |             |
|----------------------------------------------------|------------|------------|-------------|-------------------------------------------------|------------|------------|-------------|
| O                                                  | 6.81335800 | 5.96368500 | -0.59231800 | H                                               | 3.95097300 | 3.22017300 | -0.49820000 |
|                                                    |            |            |             | H                                               | 4.85260000 | 7.39713500 | -0.62924400 |
| <b><sup>-</sup>OOC-phCl-NH<sub>2</sub> DCE</b>     |            |            |             | H                                               | 0.74726400 | 6.09293200 | -0.58344200 |
| C                                                  | 2.26562600 | 4.57242700 | -0.53473400 | Cl                                              | 1.07496200 | 3.27977800 | -0.50404200 |
| C                                                  | 3.61155500 | 4.24672300 | -0.52607500 | N                                               | 2.31867200 | 8.24894500 | -0.59247200 |
| C                                                  | 4.54097300 | 5.28803100 | -0.56220700 | H                                               | 2.98495900 | 8.91078500 | -0.96558100 |
| C                                                  | 4.10925400 | 6.60728700 | -0.60321300 | H                                               | 1.39262100 | 8.40644100 | -0.96491200 |
| C                                                  | 2.74497300 | 6.92098200 | -0.61152300 | C                                               | 6.04766700 | 4.97221500 | -0.55821200 |
| C                                                  | 1.80917900 | 5.88168500 | -0.57532600 | O                                               | 6.35796500 | 3.76167300 | -0.52196100 |
| H                                                  | 3.95078400 | 3.22025500 | -0.49489000 | O                                               | 6.82064900 | 5.95434200 | -0.59198800 |
| H                                                  | 4.85377100 | 7.39459900 | -0.63133500 |                                                 |            |            |             |
| H                                                  | 0.74661900 | 6.09347600 | -0.57817200 | <b><sup>-</sup>OOC-phCl-NH<sub>2</sub> DMSO</b> |            |            |             |
| Cl                                                 | 1.07259500 | 3.28086200 | -0.49690000 | C                                               | 2.26651400 | 4.57231600 | -0.53888100 |
| N                                                  | 2.31892700 | 8.25006800 | -0.59448900 | C                                               | 3.61286700 | 4.24710700 | -0.52844600 |
| H                                                  | 2.98854900 | 8.90845900 | -0.96772500 | C                                               | 4.54191500 | 5.28891400 | -0.56301700 |
| H                                                  | 1.39659300 | 8.40639900 | -0.97643500 | C                                               | 4.11047700 | 6.60848900 | -0.60441700 |
| C                                                  | 6.04858400 | 4.97248400 | -0.56040600 | C                                               | 2.74523200 | 6.92197400 | -0.61331400 |
| O                                                  | 6.35764100 | 3.76223500 | -0.52641500 | C                                               | 1.81006300 | 5.88129900 | -0.57908500 |
| O                                                  | 6.81815200 | 5.95676100 | -0.59409300 | H                                               | 3.95079700 | 3.22036600 | -0.49693900 |
|                                                    |            |            |             | H                                               | 4.85196500 | 7.39857600 | -0.63166300 |
| <b><sup>-</sup>OOC-phCl-NH<sub>2</sub> Acetone</b> |            |            |             | H                                               | 0.74757300 | 6.09311100 | -0.58422200 |
| C                                                  | 2.26634800 | 4.57210700 | -0.53883800 | Cl                                              | 1.07559300 | 3.28000300 | -0.50309900 |
| C                                                  | 3.61267600 | 4.24689100 | -0.52884800 | N                                               | 2.31906100 | 8.24859600 | -0.59405500 |
| C                                                  | 4.54163400 | 5.28860700 | -0.56276900 | H                                               | 2.98397700 | 8.91153300 | -0.96768300 |
| C                                                  | 4.10991400 | 6.60807600 | -0.60295600 | H                                               | 1.39126500 | 8.40659000 | -0.96198000 |
| C                                                  | 2.74508300 | 6.92153500 | -0.61203600 | C                                               | 6.04676800 | 4.97138600 | -0.55702900 |
| C                                                  | 1.80979200 | 5.88109900 | -0.57843500 | O                                               | 6.35746000 | 3.76060200 | -0.51942000 |

|                                                   |            |            |             |                                                |            |            |             |
|---------------------------------------------------|------------|------------|-------------|------------------------------------------------|------------|------------|-------------|
| O                                                 | 6.82225000 | 5.95187100 | -0.59068600 | H                                              | 3.98024700 | 3.24338200 | -0.32456000 |
|                                                   |            |            |             | H                                              | 4.84275200 | 7.35138500 | -0.98692200 |
|                                                   |            |            |             | H                                              | 0.74111700 | 6.09934000 | -0.48325300 |
| <b><sup>-</sup>OOC-phCl-NH<sub>2</sub> Water</b>  |            |            |             | N                                              | 2.28855800 | 8.22777300 | -0.94434000 |
| C                                                 | 2.26674300 | 4.57242100 | -0.53699900 | H                                              | 1.45907600 | 8.45500800 | -0.41367300 |
| C                                                 | 3.61327200 | 4.24723300 | -0.52867900 | H                                              | 3.01631800 | 8.90593100 | -0.76555000 |
| C                                                 | 4.54210600 | 5.28900800 | -0.56455000 | C                                              | 6.05883800 | 4.96194700 | -0.73411900 |
| C                                                 | 4.11060100 | 6.60874000 | -0.60528400 | O                                              | 6.34868300 | 3.76389600 | -0.57524000 |
| C                                                 | 2.74540600 | 6.92210400 | -0.61273400 | O                                              | 6.78612100 | 5.95116600 | -0.93740300 |
| C                                                 | 1.81022800 | 5.88120600 | -0.57697900 | Br                                             | 0.97261300 | 3.19916500 | -0.08139000 |
| H                                                 | 3.95086300 | 3.22033500 | -0.49795000 |                                                |            |            |             |
| H                                                 | 4.85183400 | 7.39907800 | -0.63309200 |                                                |            |            |             |
| H                                                 | 0.74775800 | 6.09318900 | -0.58091000 | <b><sup>-</sup>OOC-phBr-NH<sub>2</sub> TCM</b> |            |            |             |
| Cl                                                | 1.07637700 | 3.27978700 | -0.49966000 | C                                              | 2.27350300 | 4.58518000 | -0.36854100 |
| N                                                 | 2.31912000 | 8.24841600 | -0.59276800 | C                                              | 3.61536000 | 4.25242700 | -0.44142600 |
| H                                                 | 2.98241800 | 8.91164900 | -0.96874000 | C                                              | 4.53602200 | 5.27952600 | -0.66145100 |
| H                                                 | 1.38986000 | 8.40590700 | -0.95720800 | C                                              | 4.09808800 | 6.58864100 | -0.80831500 |
| C                                                 | 6.04667700 | 4.97137900 | -0.56042800 | C                                              | 2.73834500 | 6.90833000 | -0.73448700 |
| O                                                 | 6.35798000 | 3.76068000 | -0.52297000 | C                                              | 1.81029600 | 5.88596600 | -0.50935800 |
| O                                                 | 6.82253400 | 5.95160300 | -0.59498700 | H                                              | 3.96610800 | 3.23518500 | -0.33464000 |
|                                                   |            |            |             | H                                              | 4.83910900 | 7.36086600 | -0.98169700 |
|                                                   |            |            |             | H                                              | 0.75120200 | 6.10692400 | -0.45159900 |
| <b><sup>-</sup>OOC-phBr-NH<sub>2</sub> Vacuum</b> |            |            |             | N                                              | 2.30138400 | 8.22031400 | -0.94227500 |
| C                                                 | 2.27102000 | 4.58418800 | -0.37821200 | H                                              | 1.41945900 | 8.44666300 | -0.50474600 |
| C                                                 | 3.61175500 | 4.25413000 | -0.44168900 | H                                              | 2.99929800 | 8.92423800 | -0.74670200 |
| C                                                 | 4.53302200 | 5.28063600 | -0.66519400 | C                                              | 6.04440600 | 4.95999800 | -0.73779400 |
| C                                                 | 4.09015500 | 6.58743100 | -0.81652700 | O                                              | 6.35393400 | 3.75527600 | -0.63151500 |
| C                                                 | 2.73252000 | 6.90165900 | -0.74512300 | O                                              | 6.80183900 | 5.94054900 | -0.89558600 |
| C                                                 | 1.80214200 | 5.88370300 | -0.52701200 |                                                |            |            |             |

Br 0.98658300 3.20066000 -0.07007500

**<sup>-</sup>OOC-phBr-NH<sub>2</sub> DCE**

C 2.27365400 4.58574800 -0.36734900

C 3.61604300 4.25287300 -0.44067400

C 4.53679400 5.27994400 -0.66034900

C 4.09998500 6.58991900 -0.80566300

C 2.73948700 6.91027200 -0.73190600

C 1.81152800 5.88662400 -0.50729500

H 3.96402100 3.23492200 -0.33328800

H 4.83825600 7.36474200 -0.97810600

H 0.75276600 6.10868800 -0.44811800

N 2.30324800 8.21938000 -0.94063000

H 1.41377600 8.44513700 -0.51805500

H 2.99606500 8.92807400 -0.74385900

C 6.04125900 4.95778200 -0.73995000

O 6.35311800 3.75214900 -0.63562800

O 6.80577400 5.93363800 -0.89996600

Br 0.98916200 3.20085000 -0.06937200

**<sup>-</sup>OOC-phBr-NH<sub>2</sub> Acetone**

C 2.27294000 4.58632000 -0.36957200

C 3.61559300 4.25292300 -0.44162200

C 4.53706700 5.27985200 -0.65887400

C 4.10155200 6.59065000 -0.80240800

C 2.74066000 6.91170900 -0.73043600

C 1.81198900 5.88747000 -0.50857300

H 3.96173100 3.23441700 -0.33432900

H 4.83892700 7.36682700 -0.97222300

H 0.75338800 6.11045500 -0.45018000

N 2.30539300 8.21966100 -0.93876700

H 1.41174400 8.44493100 -0.52471900

H 2.99563200 8.93039000 -0.74022100

C 6.03961100 4.95562200 -0.73893700

O 6.35166200 3.74916500 -0.63714700

O 6.80830000 5.92893100 -0.89777700

Br 0.98874700 3.20141800 -0.07442300

**<sup>-</sup>OOC-phBr-NH<sub>2</sub> DMSO**

C 2.27387100 4.58581700 -0.36864000

C 3.61690500 4.25328900 -0.44109700

C 4.53771400 5.28072300 -0.65871800

C 4.10165600 6.59154800 -0.80160500

C 2.74035000 6.91188300 -0.72929500

C 1.81235200 5.88663600 -0.50743600

H 3.96292900 3.23481400 -0.33336800

H 4.83765100 7.36904100 -0.97134100

H 0.75373500 6.10935400 -0.44830300

N 2.30435100 8.21862100 -0.93760900

H 1.40833300 8.44290200 -0.52814100

H 2.99256500 8.93120900 -0.73877500

C 6.03931600 4.95642000 -0.74098500

O 6.35275000 3.75010400 -0.63748000

O 6.80912400 5.92844000 -0.90395200

Br 0.99133500 3.19993800 -0.07346500

**<sup>-</sup>OOC-phBr-NH<sub>2</sub> Water**

C 2.27401800 4.58605300 -0.36724900

C 3.61707900 4.25351900 -0.43939600

C 4.53781300 5.28084100 -0.65814800

C 4.10185600 6.59157800 -0.80206900

C 2.74035200 6.91192500 -0.72999200

C 1.81248000 5.88675800 -0.50731100

H 3.96311400 3.23520500 -0.33065300

H 4.83744400 7.36928500 -0.97231400

H 0.75382400 6.10937400 -0.44877100

N 2.30437000 8.21826500 -0.93949900

H 1.40776700 8.44283300 -0.53147300

H 2.99215400 8.93141000 -0.74110000

C 6.03898900 4.95606700 -0.74062900

O 6.35248700 3.74968700 -0.63652300

O 6.80961900 5.92746900 -0.90440300

Br 0.99157100 3.20047300 -0.07067900

**<sup>-</sup>OOC-phI-NH<sub>2</sub> Vacuum**

C 2.27365000 4.58473700 -0.38178800

C 3.61351600 4.25350400 -0.44385000

C 4.53414200 5.28248000 -0.66559600

C 4.09130000 6.58870200 -0.81603400

C 2.73368700 6.90270200 -0.74556500

C 1.80305100 5.88361700 -0.52970900

H 3.98960200 3.24547600 -0.32810700

H 4.84389400 7.35297900 -0.98525700

H 0.74358300 6.10567200 -0.48771400

N 2.28949700 8.22854100 -0.94361800

H 1.45694100 8.45418800 -0.41713600

H 3.01562900 8.90737700 -0.76088900

C 6.06110400 4.96373900 -0.73308900

O 6.35060600 3.76602700 -0.57363500

O 6.78692000 5.95376900 -0.93590800

I 0.82261900 3.03537300 -0.05492500

**<sup>-</sup>OOC-phI-NH<sub>2</sub> TCM**

C 2.27307900 4.58450600 -0.37437700

C 3.61547300 4.25270400 -0.44538200

C 4.53705800 5.28081300 -0.66215000

C 4.09970100 6.59003800 -0.80741500

C 2.74026200 6.90948400 -0.73528900

C 1.81134300 5.88613700 -0.51372600

H 3.97274100 3.23769900 -0.33979400

H 4.84127700 7.36241900 -0.97816400

H 0.75397800 6.11507900 -0.45761300

N 2.30334300 8.22233700 -0.94093500

H 1.42031100 8.44676800 -0.50443000

H 3.00043700 8.92548600 -0.73934800

C 6.04589900 4.96102000 -0.73633900

O 6.35525100 3.75603100 -0.63316700

O 6.80347300 5.94209600 -0.88994900

I 0.83611600 3.03626600 -0.04474000

**<sup>-</sup>OOC-phI-NH<sub>2</sub> DCE**

C 2.27281600 4.58459500 -0.37419100

C 3.61603200 4.25309800 -0.44553100

C 4.53783900 5.28119100 -0.66075800

C 4.10181400 6.59142600 -0.80387400

C 2.74156900 6.91143200 -0.73256000

C 1.81272300 5.88656200 -0.51240500

H 3.97066600 3.23729800 -0.34031400

H 4.84059800 7.36665900 -0.97259500

H 0.75565300 6.11667200 -0.45577500

N 2.30535500 8.22127800 -0.93868800

H 1.41461300 8.44508600 -0.51767400

H 2.99714100 8.92944100 -0.73632400

C 6.04279400 4.95909300 -0.73743800

O 6.35466600 3.75312100 -0.63750000

O 6.80751100 5.93581000 -0.89104400

I 0.83795000 3.03612100 -0.04614700

**<sup>-</sup>OOC-phI-NH<sub>2</sub> Acetone**

C 2.27255300 4.58471700 -0.37503600

C 3.61620400 4.25334600 -0.44578800

C 4.53832900 5.28145800 -0.65954800

C 4.10308300 6.59231500 -0.80131300

C 2.74237800 6.91253200 -0.73122600

C 1.81335400 5.88686100 -0.51273500

H 3.96953200 3.23713900 -0.34057500

H 4.84058800 7.36908300 -0.96821200

H 0.75641600 6.11762300 -0.45636300

N 2.30650400 8.22097400 -0.93758500

H 1.41163000 8.44404200 -0.52487600

H 2.99541000 8.93151800 -0.73365900

C 6.04139300 4.95781100 -0.73731500

O 6.35397500 3.75116100 -0.63977000

O 6.80992800 5.93219100 -0.89028700

I 0.83846400 3.03611200 -0.04853100

**<sup>-</sup>OOC-phI-NH<sub>2</sub> DMSO**

C 2.27313500 4.58468700 -0.37262300

C 3.61707700 4.25378900 -0.44427000

C 4.53878900 5.28197300 -0.65941700

C 4.10339200 6.59292000 -0.80122500

C 2.74239200 6.91286700 -0.73045900

C 1.81384300 5.88662300 -0.51086200

H 3.97009300 3.23757200 -0.33842300

H 4.83966600 7.37069500 -0.96871600

H 0.75697100 6.11746600 -0.45369100

N 2.30595000 8.22008500 -0.93783300

H 1.40907300 8.44278500 -0.52920600

H 2.99315800 8.93249700 -0.73461100

C 6.04074300 4.95769500 -0.73971400

O 6.35416200 3.75092200 -0.64151200

O 6.81090300 5.93062300 -0.89581200

I 0.84039500 3.03568500 -0.04444300

**<sup>-</sup>OOC-phI-NH<sub>2</sub> Water**

C 2.27295800 4.58472900 -0.37341000

C 3.61684500 4.25374500 -0.44557200

C 4.53878700 5.28197000 -0.65989300

C 4.10372400 6.59312900 -0.80049100

C 2.74256700 6.91319600 -0.72966500

C 1.81396900 5.88691800 -0.51071300

H 3.96954300 3.23729800 -0.34056800

H 4.83967400 7.37136000 -0.96721700

H 0.75718300 6.11798700 -0.45272100

N 2.30647100 8.22058100 -0.93611500

H 1.40911000 8.44298500 -0.52829700

H 2.99349100 8.93282700 -0.73174400

C 6.04029900 4.95705000 -0.74065400

O 6.35338200 3.74993300 -0.64423800

O 6.81160300 5.92937900 -0.89546100

I 0.84013500 3.03579600 -0.04605900

**HOOC-CH<sub>2</sub>-NH<sub>3</sub><sup>+</sup> Vacuum**

N -2.56041600 -1.27111200 0.03463200

H -1.57335100 -1.01328300 -0.19131800

C -3.31527900 0.02375200 0.02432000

C -2.24000100 1.12178000 -0.08550100

H -3.97828900 0.04795100 -0.84105500

H -3.90492000 0.11523300 0.93627600

O -1.09654100 0.79867800 -0.21877200

H -2.90539200 -1.94570600 -0.65219000

O -2.63845300 2.37121900 -0.04037600

H -3.58917800 2.49017700 0.08056600

H -2.56451800 -1.72193100 0.95341900

**HOOC-CH<sub>2</sub>-NH<sub>3</sub><sup>+</sup> TCM**

N -2.56455700 -1.27105100 0.01738800

H -1.67258300 -1.18894700 -0.48844200

C -3.28360100 0.03183300 -0.04110400

C -2.22858200 1.13324600 -0.01194000

H -3.84763900 0.08059400 -0.97249900

H -3.96992300 0.09747300 0.80184300

O -1.06303500 0.86782700 -0.07885000

H -3.11247800 -2.03507300 -0.38568400

O -2.66650000 2.37755900 0.06536300

H -3.62886800 2.44961000 0.11355200

H -2.32857200 -1.52631100 0.98037500

**HOOC-CH<sub>2</sub>-NH<sub>3</sub><sup>+</sup> DCE**

N -2.55932200 -1.26973700 -0.02873300

H -1.89716100 -1.35299700 -0.80597000

C -3.27060900 0.03522800 -0.06564200

C -2.23400500 1.13419300 0.10972400

H -3.78456800 0.12520900 -1.02218700

H -4.00183600 0.05611500 0.74215000

O -1.07411700 0.87594500 0.25736200

|   |             |             |             |
|---|-------------|-------------|-------------|
| H | -3.21590000 | -2.05250400 | -0.08288200 |
| O | -2.68025300 | 2.38089200  | 0.09412100  |
| H | -3.63641000 | 2.44867400  | -0.03083800 |
| H | -2.01215600 | -1.36425900 | 0.83289600  |

**HOOC-CH<sub>2</sub>-NH<sub>3</sub><sup>+</sup> Acetone**

|   |             |             |             |
|---|-------------|-------------|-------------|
| N | -2.55918900 | -1.27008400 | -0.02919900 |
| H | -1.90105000 | -1.35765100 | -0.80907800 |
| C | -3.26778300 | 0.03547500  | -0.06591500 |
| C | -2.23384000 | 1.13475300  | 0.11291600  |
| H | -3.78006400 | 0.12665400  | -1.02310600 |
| H | -4.00087400 | 0.05641700  | 0.74005000  |
| O | -1.07298700 | 0.88184800  | 0.26664900  |
| H | -3.21879500 | -2.05054400 | -0.07978200 |
| O | -2.68266100 | 2.38105000  | 0.09420900  |
| H | -3.63824800 | 2.44531600  | -0.03792500 |
| H | -2.01084500 | -1.36647500 | 0.83118100  |

**HOOC-CH<sub>2</sub>-NH<sub>3</sub><sup>+</sup> DMSO**

|   |             |             |             |
|---|-------------|-------------|-------------|
| N | -2.55875800 | -1.27033600 | -0.02902900 |
| H | -1.90676000 | -1.36255900 | -0.81327800 |
| C | -3.26585000 | 0.03551400  | -0.06544900 |
| C | -2.23371600 | 1.13553200  | 0.11424600  |
| H | -3.77775100 | 0.12682600  | -1.02274600 |
| H | -3.99925600 | 0.05695500  | 0.74019200  |
| O | -1.07222900 | 0.88657200  | 0.27170200  |
| H | -3.22062600 | -2.04920400 | -0.07340300 |

|   |             |             |             |
|---|-------------|-------------|-------------|
| O | -2.68509900 | 2.38131000  | 0.09307100  |
| H | -3.64032300 | 2.44252300  | -0.04374000 |
| H | -2.00597100 | -1.36637300 | 0.82843400  |

**HOOC-CH<sub>2</sub>-NH<sub>3</sub><sup>+</sup> Water**

|   |             |             |             |
|---|-------------|-------------|-------------|
| N | -2.55888500 | -1.27054100 | -0.02942200 |
| H | -1.90832700 | -1.36371400 | -0.81483500 |
| C | -3.26520400 | 0.03557600  | -0.06527900 |
| C | -2.23350900 | 1.13560200  | 0.11508900  |
| H | -3.77640300 | 0.12776400  | -1.02298000 |
| H | -3.99903000 | 0.05726300  | 0.73975200  |
| O | -1.07189900 | 0.88762500  | 0.27410000  |
| H | -3.22192200 | -2.04837800 | -0.07231000 |
| O | -2.68539400 | 2.38114700  | 0.09262100  |
| H | -3.64073200 | 2.44126600  | -0.04422500 |
| H | -2.00503300 | -1.36685200 | 0.82748700  |

**HOOC-CH<sub>2</sub>-NH<sub>2</sub> Vacuum**

|   |             |             |             |
|---|-------------|-------------|-------------|
| N | -2.72178600 | -1.30433700 | -0.20581000 |
| C | -3.32481100 | -0.00074300 | -0.02810700 |
| C | -2.24652200 | 1.05389700  | 0.15717100  |
| H | -3.93194000 | 0.26316900  | -0.90186700 |
| H | -3.97590500 | 0.08550800  | 0.85573800  |
| O | -1.12102900 | 0.80316900  | 0.46180300  |
| H | -3.31474600 | -2.04442200 | 0.14414000  |
| O | -2.65108600 | 2.33127300  | 0.00502900  |
| H | -3.56458200 | 2.36754800  | -0.29613800 |



H -1.83110900 -1.33766600 0.27944500

**HOOC-CH<sub>2</sub>-NH<sub>2</sub> TCM**

N -2.67369600 -1.29967800 -0.19331200

C -3.29824900 -0.00082800 -0.02532000

C -2.23939500 1.07151500 0.12486300

H -3.91724200 0.23293400 -0.89641300

H -3.94241500 0.08937100 0.86275100

O -1.09152500 0.84686500 0.38356100

H -3.34242000 -2.03872600 -0.01273100

O -2.66657500 2.34026200 -0.00017300

H -3.59967800 2.37568400 -0.24206100

H -1.91232000 -1.40000300 0.47024200

**HOOC-CH<sub>2</sub>-NH<sub>2</sub> DCE**

N -2.65589400 -1.29869400 -0.18272600

C -3.28673400 -0.00093600 -0.02411800

C -2.23524000 1.07916500 0.11235100

H -3.90700500 0.22022600 -0.89703900

H -3.93237900 0.09273800 0.86218100

O -1.07879100 0.86565800 0.34718600

H -3.34476600 -2.03392100 -0.07297700

O -2.67386300 2.34448000 0.00124000

H -3.61388400 2.37642000 -0.21473300

H -1.95496100 -1.42773900 0.54004100

**HOOC-CH<sub>2</sub>-NH<sub>2</sub> Acetone**

N -2.64524100 -1.29851700 -0.17451800

C -3.27891700 -0.00094100 -0.02350100

C -2.23216000 1.08417300 0.10459500

H -3.89934100 0.21229500 -0.89807400

H -3.92626900 0.09586600 0.86102000

O -1.07052200 0.87830500 0.32332000

H -3.34407200 -2.03002700 -0.11022400

O -2.67907700 2.34707000 0.00334700

H -3.62301400 2.37532500 -0.19661400

H -1.98490400 -1.44615400 0.58205500

**HOOC-CH<sub>2</sub>-NH<sub>2</sub> DMSO**

N -2.64026200 -1.29887800 -0.17011200

C -3.27505100 -0.00100200 -0.02402700

C -2.23064600 1.08645300 0.10039500

H -3.89461000 0.20839200 -0.90004700

H -3.92410900 0.09762400 0.85884800

O -1.06626100 0.88435200 0.31003100

H -3.34326900 -2.02800700 -0.12570000

O -2.68165300 2.34810000 0.00540100

H -3.62769900 2.37473000 -0.18536900

H -1.99995600 -1.45436800 0.60198700

**HOOC-CH<sub>2</sub>-NH<sub>2</sub> Water**

N -2.63882000 -1.29906500 -0.16859100

C -3.27388300 -0.00104100 -0.02441600

C -2.23018000 1.08709700 0.09893900



|   |             |             |             |   |             |             |             |
|---|-------------|-------------|-------------|---|-------------|-------------|-------------|
| C | -3.29941900 | -0.00605000 | -0.09311500 | H | -2.79059500 | -4.01754100 | 0.71304000  |
| C | -2.24192700 | 1.10243300  | 0.08628600  | H | -2.75077900 | -3.73887600 | -1.02046300 |
| H | -3.87708500 | 0.22089300  | -0.99204300 | H | -4.95260700 | -2.53745900 | -0.89503000 |
| H | -3.98493800 | 0.09411000  | 0.75961300  | H | -5.11350500 | -4.14371500 | -0.19605900 |
| O | -1.09925000 | 0.75087100  | 0.45905900  | H | -2.80195300 | -0.13316500 | 1.40177400  |
| H | -3.32276100 | -2.04195500 | 0.18316700  | H | -4.88280300 | -3.24536200 | 2.10112100  |
| O | -2.63859700 | 2.27230000  | -0.12606400 | H | -6.11171100 | -2.26290900 | 1.26163600  |
| H | -1.86054900 | -1.33183100 | 0.38462700  | H | -2.38399200 | -1.36264200 | -0.76939900 |
|   |             |             |             | O | -4.32415900 | -1.34865800 | 1.56734400  |

**<sup>-</sup>OOC-CH<sub>2</sub>-NH<sub>2</sub> Water**

|   |             |             |             |
|---|-------------|-------------|-------------|
| N | -2.69608200 | -1.33526700 | -0.19107700 |
| C | -3.29858700 | -0.00589200 | -0.09166800 |
| C | -2.24198800 | 1.10336200  | 0.08564100  |
| H | -3.87882900 | 0.22027400  | -0.98906200 |
| H | -3.98207400 | 0.09309500  | 0.76293400  |
| O | -1.09952800 | 0.75369300  | 0.46104700  |
| H | -3.32386200 | -2.04301100 | 0.17255300  |
| O | -2.63846800 | 2.27277700  | -0.13027200 |
| H | -1.86352800 | -1.33455000 | 0.39130800  |

**Six-membered Oxocarbenium Vacuum**

|   |             |             |             |
|---|-------------|-------------|-------------|
| C | -4.62202300 | -3.17722600 | -0.07110900 |
| C | -3.10112800 | -3.32721500 | -0.07519200 |
| C | -2.45978900 | -1.95961200 | 0.15566100  |
| C | -3.20462700 | -1.09679600 | 1.08208100  |
| C | -5.07788600 | -2.59811800 | 1.24524800  |
| H | -1.42669400 | -2.00342000 | 0.52339400  |

**Dimethyloxidanium Vacuum**

|   |             |             |             |
|---|-------------|-------------|-------------|
| O | -0.24745500 | 0.34395600  | 0.03999200  |
| C | 1.22818100  | 0.24706300  | -0.00594900 |
| H | 1.46265800  | -0.80997100 | 0.08489900  |
| H | 1.57604000  | 0.67590900  | -0.94387700 |
| H | 1.57834300  | 0.80225800  | 0.85973900  |
| C | -0.83182400 | 1.70294100  | 0.00076400  |
| H | -0.53423700 | 2.18204300  | -0.93014500 |
| H | -1.90726600 | 1.57014300  | 0.07998200  |
| H | -0.43417900 | 2.21076200  | 0.87501700  |
| H | -0.68330000 | -0.26988200 | -0.57452900 |

**Methylguanidinium Vacuum**

|   |             |             |             |
|---|-------------|-------------|-------------|
| C | 0.03687000  | -0.02178900 | -0.00611700 |
| N | 0.04980700  | -0.12230200 | 1.32274400  |
| N | 1.19121300  | 0.04835300  | -0.67465000 |
| N | -1.11882300 | 0.01639300  | -0.65698800 |

|   |             |             |             |    |            |            |             |
|---|-------------|-------------|-------------|----|------------|------------|-------------|
| C | -2.42428100 | 0.06103600  | 0.00150600  | H  | 4.53712300 | 7.28921400 | -0.67127400 |
| H | -0.79643300 | -0.29540300 | 1.84211400  | H  | 0.55236800 | 5.59643700 | -0.53187400 |
| H | 0.90594400  | -0.02646400 | 1.84639300  | Cl | 1.12250900 | 2.82457700 | -0.38930000 |
| H | 2.07361200  | -0.11897800 | -0.21704100 | N  | 1.88314700 | 7.89990700 | -0.65514400 |
| H | 1.21428800  | 0.26993900  | -1.65780900 | H  | 2.58620400 | 8.61447100 | -0.86035700 |
| H | -1.09396800 | -0.04557600 | -1.66410700 | H  | 1.16231200 | 7.94438400 | -1.38276000 |
| H | -2.46768900 | 0.90018300  | 0.69754000  | C  | 5.86321200 | 4.89930700 | -0.56857000 |
| H | -3.18101800 | 0.21339400  | -0.76341500 | O  | 6.37725200 | 3.82130700 | -0.52262600 |
| H | -2.63897100 | -0.87878600 | 0.51492800  | O  | 6.56123500 | 6.05046600 | -0.63539800 |

**Cation-Anion-Cl Vacuum ModRedundant**

|   |             |             |             |
|---|-------------|-------------|-------------|
| N | -2.52420300 | -0.96130500 | 0.04428900  |
| H | -1.66280800 | -1.15976500 | -0.46018800 |
| C | -2.81481300 | 0.45241500  | -0.19502500 |
| C | -1.59767400 | 1.40694800  | -0.20429300 |
| H | -3.30249100 | 0.55872900  | -1.17001900 |
| H | -3.53122100 | 0.81757700  | 0.54412200  |
| O | -0.46125600 | 0.86181800  | -0.24043600 |
| H | -2.25592300 | -1.06422700 | 1.01839300  |
| O | -1.85729800 | 2.62785900  | -0.20594600 |
| C | 2.15138600  | 4.17843200  | -0.47938300 |
| C | 3.54789600  | 4.03190500  | -0.48980300 |
| C | 4.38677300  | 5.13541100  | -0.55887800 |
| C | 3.87304100  | 6.43458000  | -0.61950000 |
| C | 2.49986000  | 6.54364100  | -0.60779700 |
| C | 1.63274200  | 5.47180500  | -0.54074400 |
| H | 3.98333100  | 3.04020100  | -0.44356100 |

|    |            |            |             |
|----|------------|------------|-------------|
| H  | 4.53712300 | 7.28921400 | -0.67127400 |
| H  | 0.55236800 | 5.59643700 | -0.53187400 |
| Cl | 1.12250900 | 2.82457700 | -0.38930000 |
| N  | 1.88314700 | 7.89990700 | -0.65514400 |
| H  | 2.58620400 | 8.61447100 | -0.86035700 |
| H  | 1.16231200 | 7.94438400 | -1.38276000 |
| C  | 5.86321200 | 4.89930700 | -0.56857000 |
| O  | 6.37725200 | 3.82130700 | -0.52262600 |
| O  | 6.56123500 | 6.05046600 | -0.63539800 |
| H  | 7.50054400 | 5.82018300 | -0.63833500 |
| H  | 1.43988200 | 8.13532900 | 0.23897900  |

A 7 10 15 120.0 F

D 4 7 10 15 -2.0 F

**Cation-Anion-Cl TCM ModRedundant**

|   |             |             |             |
|---|-------------|-------------|-------------|
| N | -2.44073500 | -1.01578300 | 0.60045100  |
| H | -1.43950900 | -0.96182400 | 0.42716100  |
| C | -3.02791600 | 0.18506400  | 0.00316300  |
| C | -1.98220000 | 1.29904100  | -0.24094700 |
| H | -3.49146900 | -0.01029400 | -0.97188500 |
| H | -3.80795300 | 0.60110900  | 0.64596800  |
| O | -0.77545200 | 0.96777300  | -0.17118700 |
| H | -2.78455700 | -1.85363800 | 0.14760900  |
| O | -2.44724800 | 2.42794700  | -0.51125000 |
| C | 2.13087100  | 4.40023100  | -0.48177100 |
| C | 3.49438800  | 4.14477200  | -0.56783500 |

|                   |            |            |             |    |             |             |             |
|-------------------|------------|------------|-------------|----|-------------|-------------|-------------|
| C                 | 4.39155900 | 5.20346400 | -0.66857400 | O  | -0.98936300 | 1.17511700  | -0.02095600 |
| C                 | 3.94665200 | 6.52293600 | -0.68295200 | H  | -2.53882000 | -1.99616900 | -0.23309600 |
| C                 | 2.58376700 | 6.73641700 | -0.59474300 | O  | -2.90194500 | 2.34307600  | 0.09049700  |
| C                 | 1.66124500 | 5.71134500 | -0.49468400 | C  | 2.07332400  | 4.54342600  | -0.45695200 |
| H                 | 3.86536100 | 3.12734600 | -0.56061500 | C  | 3.41898000  | 4.20585100  | -0.49905100 |
| H                 | 4.65093800 | 7.34150600 | -0.76161700 | C  | 4.37595400  | 5.20888100  | -0.62440000 |
| H                 | 0.59680900 | 5.90408800 | -0.42978600 | C  | 4.00501300  | 6.54764200  | -0.70812700 |
| Cl                | 1.00041200 | 3.10252100 | -0.36559300 | C  | 2.65469200  | 6.84304200  | -0.66118000 |
| N                 | 2.08661800 | 8.12923900 | -0.59043300 | C  | 1.67485300  | 5.87460300  | -0.53910300 |
| H                 | 2.27045900 | 8.59216600 | 0.30640000  | H  | 3.73175000  | 3.17112600  | -0.43554200 |
| H                 | 2.52856200 | 8.68964600 | -1.32585000 | H  | 4.75306400  | 7.32430800  | -0.80690000 |
| C                 | 5.84796100 | 4.87897000 | -0.76499100 | H  | 0.62265500  | 6.13148300  | -0.50665800 |
| O                 | 6.28753400 | 3.76206700 | -0.75536800 | Cl | 0.87227600  | 3.30883700  | -0.29934100 |
| O                 | 6.61064100 | 5.97429000 | -0.86442900 | N  | 2.24031400  | 8.25758800  | -0.73961900 |
| H                 | 7.53613300 | 5.69707400 | -0.92710300 | H  | 2.57830000  | 8.79487100  | 0.06600300  |
| H                 | 1.07526100 | 8.16413200 | -0.74956600 | H  | 2.59844600  | 8.71019600  | -1.58711200 |
|                   |            |            |             | C  | 5.81373100  | 4.80134300  | -0.66712600 |
| A 15 10 7 120.0 F |            |            |             | O  | 6.18885100  | 3.66208100  | -0.59219900 |
| D 15 10 7 4 7.0 F |            |            |             | O  | 6.63730600  | 5.84503400  | -0.79831800 |
|                   |            |            |             | H  | 7.54872900  | 5.51885000  | -0.82239400 |
|                   |            |            |             | H  | 1.22023900  | 8.34904600  | -0.75735400 |

**Cation-Anion-Cl DCE**

|   |             |             |             |
|---|-------------|-------------|-------------|
| N | -2.23452500 | -1.20042000 | 0.31494600  |
| H | -1.28580500 | -0.97173700 | 0.02981200  |
| C | -3.05777800 | -0.02355800 | 0.03459300  |
| C | -2.23568600 | 1.28401100  | 0.04584900  |
| H | -3.54063000 | -0.06537000 | -0.95081400 |
| H | -3.85579600 | 0.07844900  | 0.77411300  |

**Cation-Anion-Cl Acetone**

|   |             |             |            |
|---|-------------|-------------|------------|
| N | -2.23006300 | -1.21171400 | 0.34385400 |
| H | -1.28982500 | -0.99799100 | 0.02270000 |
| C | -3.06701400 | -0.05488700 | 0.02450200 |
| C | -2.26616700 | 1.26430900  | 0.02847000 |

|    |             |             |             |    |             |             |             |
|----|-------------|-------------|-------------|----|-------------|-------------|-------------|
| H  | -3.52960500 | -0.12216600 | -0.96947200 | C  | -3.07150300 | -0.08172900 | 0.03818700  |
| H  | -3.88072100 | 0.04476300  | 0.74675600  | C  | -2.29991400 | 1.25283700  | -0.01162000 |
| O  | -1.01758400 | 1.17651600  | -0.02308900 | H  | -3.54965500 | -0.18837200 | -0.94512800 |
| H  | -2.54649900 | -2.03617000 | -0.15286000 | H  | -3.87432100 | 0.02008300  | 0.77197000  |
| O  | -2.94839200 | 2.31474200  | 0.05068600  | O  | -1.05188200 | 1.19034600  | -0.09969600 |
| C  | 2.07215200  | 4.56873900  | -0.45069500 | H  | -2.52968900 | -2.06153700 | -0.06356600 |
| C  | 3.41391900  | 4.21961100  | -0.49860200 | O  | -3.00233600 | 2.29047800  | 0.00654300  |
| C  | 4.37765900  | 5.21592700  | -0.62721700 | C  | 2.06735100  | 4.58715400  | -0.46696400 |
| C  | 4.01562800  | 6.55709200  | -0.70809900 | C  | 3.40620400  | 4.22823800  | -0.51242200 |
| C  | 2.66795400  | 6.86381100  | -0.65516300 | C  | 4.37714900  | 5.21911200  | -0.62870000 |
| C  | 1.68163000  | 5.90212200  | -0.52978800 | C  | 4.02416300  | 6.56316800  | -0.69993100 |
| H  | 3.71883300  | 3.18245500  | -0.43804900 | C  | 2.67857000  | 6.87943900  | -0.64951000 |
| H  | 4.76796000  | 7.32898900  | -0.81003700 | C  | 1.68528300  | 5.92335100  | -0.53554100 |
| H  | 0.63182600  | 6.16761500  | -0.49345400 | H  | 3.70337000  | 3.18841600  | -0.46031400 |
| Cl | 0.86265600  | 3.33931700  | -0.29169200 | H  | 4.78152500  | 7.33107500  | -0.79365800 |
| N  | 2.26580100  | 8.28062000  | -0.73133500 | H  | 0.63736500  | 6.19620900  | -0.50109100 |
| H  | 2.60329900  | 8.81288700  | 0.07787200  | Cl | 0.84831700  | 3.36248700  | -0.32735700 |
| H  | 2.63331700  | 8.73319900  | -1.57488500 | N  | 2.28790400  | 8.29907800  | -0.71788600 |
| C  | 5.81199100  | 4.79779300  | -0.67753700 | H  | 2.62417800  | 8.82326000  | 0.09711300  |
| O  | 6.17834400  | 3.65470500  | -0.60596400 | H  | 2.66506900  | 8.75466000  | -1.55558200 |
| O  | 6.64234600  | 5.83438400  | -0.81136100 | C  | 5.80864500  | 4.79155300  | -0.67807700 |
| H  | 7.55180100  | 5.50293100  | -0.84091500 | O  | 6.16653800  | 3.64483400  | -0.61461800 |
| H  | 1.24688500  | 8.38200700  | -0.75505300 | O  | 6.64631200  | 5.82271000  | -0.80118800 |
|    |             |             |             | H  | 7.55388600  | 5.48602900  | -0.83105500 |
|    |             |             |             | H  | 1.27017500  | 8.40956500  | -0.74801700 |

**Cation-Anion-Cl DMSO**

|   |             |             |            |
|---|-------------|-------------|------------|
| N | -2.20285300 | -1.20929200 | 0.37663600 |
| H | -1.28172000 | -1.00154500 | 0.00104600 |

**Cation-Anion-Cl Water**

|    |             |             |             |
|----|-------------|-------------|-------------|
| N  | -2.20699100 | -1.21372200 | 0.37467400  |
| H  | -1.28761700 | -1.01054400 | -0.00753600 |
| C  | -3.07502100 | -0.08553300 | 0.03684300  |
| C  | -2.30328400 | 1.24880200  | -0.00948600 |
| H  | -3.55199100 | -0.19039700 | -0.94728100 |
| H  | -3.87875100 | 0.01461400  | 0.76983100  |
| O  | -1.05516500 | 1.18680800  | -0.09674200 |
| H  | -2.53898200 | -2.06687600 | -0.06002300 |
| O  | -3.00547400 | 2.28675200  | 0.01016800  |
| C  | 2.06905800  | 4.59041000  | -0.46595800 |
| C  | 3.40768300  | 4.23073100  | -0.50795100 |
| C  | 4.37900800  | 5.22113700  | -0.62517700 |
| C  | 4.02631600  | 6.56497600  | -0.70075500 |
| C  | 2.68076300  | 6.88201700  | -0.65348500 |
| C  | 1.68707700  | 5.92635200  | -0.53876500 |
| H  | 3.70444300  | 3.19100100  | -0.45234600 |
| H  | 4.78394500  | 7.33248100  | -0.79510900 |
| H  | 0.63920800  | 6.19963900  | -0.50688000 |
| Cl | 0.84958400  | 3.36567800  | -0.32518900 |
| N  | 2.29107500  | 8.30147200  | -0.72611600 |
| H  | 2.62849800  | 8.82804600  | 0.08688200  |
| H  | 2.66806400  | 8.75411900  | -1.56548200 |
| C  | 5.81051400  | 4.79326700  | -0.67025900 |
| O  | 6.16797800  | 3.64651700  | -0.60251500 |
| O  | 6.64850900  | 5.82372900  | -0.79458400 |
| H  | 7.55622300  | 5.48713300  | -0.82141800 |
| H  | 1.27346100  | 8.41299600  | -0.75576900 |

**Cation-Anion-Br Vacuum ModRedundant**

|   |             |             |             |
|---|-------------|-------------|-------------|
| N | -2.45363900 | -0.99222700 | -0.03795400 |
| H | -1.59167600 | -1.05749300 | 0.49779900  |
| C | -2.89676900 | 0.39752100  | 0.05198600  |
| C | -1.80832700 | 1.48109700  | -0.10767300 |
| H | -3.67442500 | 0.58792700  | -0.69089000 |
| H | -3.36227200 | 0.56322200  | 1.02901700  |
| O | -0.60948000 | 1.06520100  | -0.08075800 |
| H | -2.15387800 | -1.16467000 | -0.99280800 |
| O | -2.19170700 | 2.65458100  | -0.22094600 |
| C | 2.17045400  | 4.35974700  | -0.44692600 |
| C | 3.56092500  | 4.17130900  | -0.44533800 |
| C | 4.43661100  | 5.24351700  | -0.56343100 |
| C | 3.96344400  | 6.55342100  | -0.68655400 |
| C | 2.59380200  | 6.70595000  | -0.68527600 |
| C | 1.69305900  | 5.66462900  | -0.57228800 |
| H | 3.97039900  | 3.17162300  | -0.35213800 |
| H | 4.65358500  | 7.38397900  | -0.77624400 |
| H | 0.61867800  | 5.83318100  | -0.57675600 |
| N | 2.02482200  | 8.08062800  | -0.79715400 |
| H | 2.75046400  | 8.75738700  | -1.04693200 |
| H | 1.29772100  | 8.11292000  | -1.51881600 |
| C | 5.90462500  | 4.96379500  | -0.55816300 |
| O | 6.38832200  | 3.87485300  | -0.45905800 |
| O | 6.63868800  | 6.08900800  | -0.67889700 |
| H | 7.56986300  | 5.82837300  | -0.66765600 |

H 1.60133400 8.37858600 0.08757600  
Br 0.95418300 2.91703600 -0.28769000

A 15 10 7 120.0 F

D 15 10 7 4 0.0 F

**Cation-Anion-Br TCM**

N -2.39157800 -1.07225200 0.38093000  
H -1.42914300 -0.99378900 0.06025600  
C -3.02644400 0.21809000 0.10664000  
C -2.00124600 1.34601400 -0.15066900  
H -3.67160000 0.19126100 -0.77999400  
H -3.65470100 0.53250400 0.94420300  
O -0.81208000 0.99396700 -0.35136200  
H -2.83016900 -1.81397800 -0.15080200  
O -2.45873500 2.50751600 -0.15837700  
C 2.25436300 4.46972100 -0.54524600  
C 3.62592100 4.24239400 -0.55907600  
C 4.50924400 5.31742200 -0.62115100  
C 4.04227700 6.62805900 -0.66934900  
C 2.67254600 6.81575300 -0.65500900  
C 1.76555900 5.77401600 -0.59489900  
H 4.02012800 3.23434100 -0.52221600  
H 4.73296500 7.46080700 -0.71819100  
H 0.69656000 5.95467300 -0.58726400  
N 2.15117900 8.19824600 -0.71391800  
H 2.50696500 8.76994900 0.05913100

H 2.41129900 8.66220900 -1.59084100  
C 5.97446900 5.02086500 -0.63798100  
O 6.43545500 3.91304200 -0.60088400  
O 6.72020700 6.13085700 -0.70070600  
H 7.65299800 5.87157300 -0.70986600  
H 1.12874900 8.21159600 -0.65546600  
Br 1.02361600 3.04024400 -0.46186100

**Cation-Anion-Br DCE**

N -2.24272700 -1.18790800 0.28684400  
H -1.29374700 -0.98702500 -0.01713500  
C -3.03703800 0.01332700 0.02842500  
C -2.18297600 1.29876400 0.05882600  
H -3.52283600 0.00162300 -0.95666300  
H -3.83036200 0.12208500 0.77184200  
O -0.93958800 1.15581900 -0.03348200  
H -2.58241100 -1.97170300 -0.25764600  
O -2.81550600 2.37404700 0.14046400  
C 2.16777500 4.63407800 -0.45522600  
C 3.51729900 4.30800100 -0.49537100  
C 4.46923300 5.31559200 -0.62972800  
C 4.09046600 6.65131600 -0.72459700  
C 2.73819500 6.93820400 -0.68004600  
C 1.76459000 5.96387500 -0.54902700  
H 3.84234800 3.27761400 -0.42296000  
H 4.83403600 7.43153800 -0.82920100  
H 0.71212600 6.22091600 -0.51843300



|    |            |            |             |
|----|------------|------------|-------------|
| N  | 2.31467100 | 8.34972900 | -0.77072200 |
| H  | 2.66521400 | 8.90030200 | 0.02029300  |
| H  | 2.65350800 | 8.79219000 | -1.63135800 |
| C  | 5.90947000 | 4.91733100 | -0.66779000 |
| O  | 6.29302500 | 3.78135300 | -0.58432700 |
| O  | 6.72686100 | 5.96559700 | -0.80521100 |
| H  | 7.64022200 | 5.64467700 | -0.82525200 |
| H  | 1.29399600 | 8.43543400 | -0.76978100 |
| Br | 0.86296200 | 3.27832400 | -0.26670400 |

**Cation-Anion-Br Acetone**

|   |             |             |             |
|---|-------------|-------------|-------------|
| N | -2.25822200 | -1.12108700 | 0.53734500  |
| H | -1.27296700 | -0.88558500 | 0.45596200  |
| C | -3.01090500 | -0.06302700 | -0.13659400 |
| C | -2.28791300 | 1.29810600  | -0.07642100 |
| H | -3.17573100 | -0.26630300 | -1.20342200 |
| H | -3.99660300 | 0.06019300  | 0.31829800  |
| O | -1.06849100 | 1.28261700  | 0.21753200  |
| H | -2.40069500 | -2.01395000 | 0.07989700  |
| O | -2.98157200 | 2.29956500  | -0.36189600 |
| C | 2.14299300  | 4.68442400  | -0.38623900 |
| C | 3.47785200  | 4.32067700  | -0.49893200 |
| C | 4.44893000  | 5.30454000  | -0.66974900 |
| C | 4.10195000  | 6.65084000  | -0.72864500 |
| C | 2.76224800  | 6.97441200  | -0.61333100 |
| C | 1.77016400  | 6.02475700  | -0.44412900 |
| H | 3.77696500  | 3.28079500  | -0.45708100 |

|    |            |            |             |
|----|------------|------------|-------------|
| H  | 4.85943100 | 7.41287800 | -0.86240300 |
| H  | 0.72848200 | 6.31028600 | -0.35838500 |
| N  | 2.37481800 | 8.39653000 | -0.66956600 |
| H  | 2.77898400 | 8.92835500 | 0.10850700  |
| H  | 2.68400600 | 8.83949000 | -1.54133700 |
| C  | 5.87343100 | 4.86800900 | -0.79070600 |
| O  | 6.22830900 | 3.71989800 | -0.74290900 |
| O  | 6.71037100 | 5.89458800 | -0.95884400 |
| H  | 7.61320900 | 5.55183700 | -1.03149400 |
| H  | 1.35832700 | 8.51115600 | -0.61797600 |
| Br | 0.81143200 | 3.36109700 | -0.15145100 |

**Cation-Anion-Br DMSO**

|   |             |             |             |
|---|-------------|-------------|-------------|
| N | -2.20811200 | -1.18621700 | 0.38635600  |
| H | -1.25139900 | -0.96759900 | 0.12299300  |
| C | -3.04568200 | -0.07104400 | -0.05510600 |
| C | -2.30469000 | 1.27880800  | 0.01661300  |
| H | -3.38290500 | -0.17157200 | -1.09601500 |
| H | -3.94335000 | 0.00288500  | 0.56300800  |
| O | -1.05335800 | 1.23995400  | 0.09514100  |
| H | -2.47004200 | -2.04277000 | -0.08775800 |
| O | -3.02302500 | 2.30213200  | -0.04567400 |
| C | 2.15410900  | 4.69606800  | -0.40744300 |
| C | 3.49168800  | 4.33376700  | -0.48142400 |
| C | 4.46386200  | 5.31815700  | -0.64270100 |
| C | 4.11442400  | 6.66209100  | -0.73060200 |
| C | 2.77159900  | 6.98416100  | -0.65163700 |

|    |            |            |             |
|----|------------|------------|-------------|
| C  | 1.77820200 | 6.03373200 | -0.49334100 |
| H  | 3.79230600 | 3.29562600 | -0.41643600 |
| H  | 4.87224900 | 7.42484800 | -0.85747700 |
| H  | 0.73407700 | 6.31770600 | -0.43756200 |
| N  | 2.38317700 | 8.40372900 | -0.73613800 |
| H  | 2.76895200 | 8.94761500 | 0.04304300  |
| H  | 2.71154800 | 8.83473600 | -1.60671800 |
| C  | 5.89213400 | 4.88423400 | -0.71905200 |
| O  | 6.24817600 | 3.73754700 | -0.64406900 |
| O  | 6.73046800 | 5.90998300 | -0.87978900 |
| H  | 7.63598600 | 5.56935500 | -0.92395200 |
| H  | 1.36580600 | 8.51836700 | -0.70891800 |
| Br | 0.82260200 | 3.36880200 | -0.18930800 |

**Cation-Anion-Br Water**

|   |             |             |             |
|---|-------------|-------------|-------------|
| N | -2.15734100 | -1.19530300 | 0.28945200  |
| H | -1.19951600 | -0.91706200 | 0.09597500  |
| C | -3.01945400 | -0.07513900 | -0.08688700 |
| C | -2.33921500 | 1.28808500  | 0.14700300  |
| H | -3.30420600 | -0.08852100 | -1.14806200 |
| H | -3.94662600 | -0.09317500 | 0.49037600  |
| O | -1.09229200 | 1.28864900  | 0.28314900  |
| H | -2.36052400 | -2.01122200 | -0.27645300 |
| O | -3.09559800 | 2.28581700  | 0.14526200  |
| C | 2.13420800  | 4.71427100  | -0.34743400 |
| C | 3.46647800  | 4.33466300  | -0.43102300 |
| C | 4.44596600  | 5.30304700  | -0.63615500 |

|    |            |            |             |
|----|------------|------------|-------------|
| C  | 4.10815400 | 6.64716600 | -0.76063300 |
| C  | 2.77063800 | 6.98663000 | -0.67117800 |
| C  | 1.76990400 | 6.05245800 | -0.46619900 |
| H  | 3.75657400 | 3.29542800 | -0.34128200 |
| H  | 4.87174200 | 7.39737900 | -0.92251200 |
| H  | 0.72981900 | 6.34815300 | -0.40002100 |
| N  | 2.39812700 | 8.40783300 | -0.78728500 |
| H  | 2.64745200 | 8.93413600 | 0.05728100  |
| H  | 2.86748300 | 8.85830700 | -1.57957000 |
| C  | 5.86844400 | 4.85203200 | -0.72097000 |
| O  | 6.21364500 | 3.70391900 | -0.62028300 |
| O  | 6.71461400 | 5.86420300 | -0.92019800 |
| H  | 7.61626500 | 5.51369600 | -0.96654000 |
| H  | 1.39074500 | 8.52414100 | -0.93046800 |
| Br | 0.79332000 | 3.40551000 | -0.07931100 |

**Cation-Anion-I Vacuum**

|   |             |             |             |
|---|-------------|-------------|-------------|
| N | -2.38568300 | -0.88249100 | 0.47628200  |
| H | -1.37976800 | -0.83446900 | 0.34143700  |
| C | -2.95802000 | 0.34214700  | -0.07727000 |
| C | -1.93055900 | 1.47737500  | -0.21654600 |
| H | -3.37745000 | 0.20774000  | -1.08306200 |
| H | -3.76446100 | 0.72199300  | 0.55469800  |
| O | -0.70533400 | 1.11116900  | -0.15652200 |
| H | -2.73031900 | -1.70097300 | -0.00800900 |
| O | -2.34774200 | 2.61957600  | -0.39766600 |
| C | 2.36875400  | 4.50040400  | -0.49238400 |

|   |            |            |             |   |             |            |             |
|---|------------|------------|-------------|---|-------------|------------|-------------|
| C | 3.75756900 | 4.33537200 | -0.56009600 | O | -2.64339700 | 2.44169800 | -0.26486800 |
| C | 4.62323300 | 5.42237800 | -0.64923000 | C | 2.29230300  | 4.71070700 | -0.45629800 |
| C | 4.13214900 | 6.72985300 | -0.67630900 | C | 3.65133700  | 4.42149900 | -0.53857100 |
| C | 2.76116800 | 6.86563000 | -0.61093300 | C | 4.58966200  | 5.44321600 | -0.67095700 |
| C | 1.87743000 | 5.80629600 | -0.52173400 | C | 4.19162700  | 6.77613900 | -0.72360200 |
| H | 4.18803800 | 3.33978100 | -0.53973100 | C | 2.83671600  | 7.03609800 | -0.64119900 |
| H | 4.80899400 | 7.57358800 | -0.74413900 | C | 1.88218200  | 6.04242800 | -0.50942200 |
| H | 0.80316800 | 5.97395600 | -0.47201300 | H | 4.00308000  | 3.39726700 | -0.50190000 |
| N | 2.17920100 | 8.24014500 | -0.66397800 | H | 4.92263900  | 7.56847800 | -0.82705100 |
| H | 2.85350300 | 8.93792300 | -0.33944400 | H | 0.82828800  | 6.29270300 | -0.44906500 |
| H | 1.89359300 | 8.48915200 | -1.61605800 | N | 2.38738500  | 8.44578100 | -0.69272500 |
| C | 6.09218900 | 5.16184900 | -0.71230500 | H | 2.73670500  | 8.98284100 | 0.10778400  |
| O | 6.59275500 | 4.07557300 | -0.70172600 | H | 2.70787100  | 8.91384400 | -1.54675500 |
| O | 6.81268800 | 6.30124100 | -0.78512800 | C | 6.03319400  | 5.06865400 | -0.75823600 |
| H | 7.74506300 | 6.04841500 | -0.82444800 | O | 6.43973700  | 3.93922100 | -0.71886900 |
| H | 1.35066000 | 8.29625500 | -0.06395700 | O | 6.83365900  | 6.13520100 | -0.88753500 |
| I | 0.91690700 | 2.87625600 | -0.33953300 | H | 7.74860600  | 5.82391300 | -0.94213400 |
|   |            |            |             | H | 1.36519300  | 8.50910500 | -0.67890400 |
|   |            |            |             | I | 0.83717700  | 3.15762200 | -0.24797100 |

**Cation-Anion-I TCM**

|   |             |             |             |
|---|-------------|-------------|-------------|
| N | -2.33045100 | -1.07640000 | 0.48056700  |
| H | -1.33550700 | -0.95697900 | 0.31126200  |
| C | -3.00359100 | 0.10068900  | -0.06684300 |
| C | -2.08989700 | 1.34113800  | -0.09704400 |
| H | -3.34116300 | -0.04021500 | -1.10248400 |
| H | -3.88711500 | 0.35538400  | 0.52311600  |
| O | -0.85084000 | 1.12542300  | 0.01560000  |
| H | -2.62767500 | -1.91931900 | 0.00429900  |

**Cation-Anion-I DCE**

|   |             |             |             |
|---|-------------|-------------|-------------|
| N | -2.26574900 | -1.17663100 | 0.26472500  |
| H | -1.33402400 | -1.02859000 | -0.11269500 |
| C | -3.02230200 | 0.05584900  | 0.04732300  |
| C | -2.12205000 | 1.30571800  | 0.06344100  |
| H | -3.54003500 | 0.07818900  | -0.92158500 |
| H | -3.78566100 | 0.18283700  | 0.81816400  |

|   |             |             |             |   |             |             |             |
|---|-------------|-------------|-------------|---|-------------|-------------|-------------|
| O | -0.88774000 | 1.11089500  | -0.09982500 | H | -3.27158200 | -0.20971200 | -1.14032200 |
| H | -2.68342600 | -1.95032600 | -0.23874800 | H | -3.96815100 | 0.21895100  | 0.41827200  |
| O | -2.69282400 | 2.40498100  | 0.19863400  | O | -0.95285100 | 1.16733100  | 0.10385300  |
| C | 2.29091900  | 4.74720000  | -0.49616100 | H | -2.60722300 | -1.99408500 | 0.16737500  |
| C | 3.64783300  | 4.44399300  | -0.52388000 | O | -2.79880000 | 2.34665300  | -0.37051100 |
| C | 4.59624600  | 5.45829000  | -0.64102900 | C | 2.27965100  | 4.79103000  | -0.44135500 |
| C | 4.20813600  | 6.79154200  | -0.73299500 | C | 3.62345300  | 4.45593200  | -0.55733200 |
| C | 2.85312800  | 7.06446200  | -0.70269000 | C | 4.58690200  | 5.45201800  | -0.70532200 |
| C | 1.88804200  | 6.07831100  | -0.58765500 | C | 4.22530600  | 6.79530900  | -0.73865000 |
| H | 3.99031100  | 3.41859000  | -0.45417100 | C | 2.88153500  | 7.09893000  | -0.62220300 |
| H | 4.94589700  | 7.57894600  | -0.82439000 | C | 1.90146400  | 6.13181700  | -0.47488400 |
| H | 0.83514300  | 6.33739900  | -0.56791400 | H | 3.94389100  | 3.42139900  | -0.53644100 |
| N | 2.41836500  | 8.47375200  | -0.79214200 | H | 4.97394100  | 7.56886800  | -0.85395600 |
| H | 2.75745800  | 9.02468900  | 0.00335400  | H | 0.85840900  | 6.41413100  | -0.38778500 |
| H | 2.76025800  | 8.92222700  | -1.64825500 | N | 2.47660800  | 8.51829200  | -0.65025000 |
| C | 6.03953900  | 5.07376600  | -0.66397200 | H | 2.82587500  | 9.02727900  | 0.16856700  |
| O | 6.43527700  | 3.94127700  | -0.58320300 | H | 2.82780000  | 8.99801900  | -1.48571500 |
| O | 6.85043100  | 6.13034400  | -0.78479000 | C | 6.01598200  | 5.03533500  | -0.83118900 |
| H | 7.76618400  | 5.81611600  | -0.79480800 | O | 6.38699300  | 3.89117100  | -0.80495500 |
| H | 1.39713500  | 8.55026000  | -0.79957200 | O | 6.84246300  | 6.07472800  | -0.97814000 |
| I | 0.83123300  | 3.20204700  | -0.30496800 | H | 7.74861200  | 5.74235300  | -1.05618900 |
|   |             |             |             | H | 1.45728100  | 8.61648800  | -0.65404700 |
|   |             |             |             | I | 0.80152000  | 3.27244100  | -0.21098400 |

**Cation-Anion-I Acetone**

|   |             |             |             |
|---|-------------|-------------|-------------|
| N | -2.33038500 | -1.10543000 | 0.56802400  |
| H | -1.33699600 | -0.98404200 | 0.39337200  |
| C | -3.02643900 | -0.00022000 | -0.08999500 |
| C | -2.18753500 | 1.29115100  | -0.10904100 |

**Cation-Anion-I DMSO**

|   |             |             |            |
|---|-------------|-------------|------------|
| N | -2.27466400 | -1.16797700 | 0.43165700 |
| H | -1.30741400 | -1.03896700 | 0.14991800 |

|   |             |             |             |   |             |             |             |
|---|-------------|-------------|-------------|---|-------------|-------------|-------------|
| C | -3.03146300 | -0.01417600 | -0.05272000 | N | -2.27474800 | -1.17093300 | 0.43103700  |
| C | -2.20629200 | 1.28504500  | -0.01464600 | H | -1.30869700 | -1.04355400 | 0.14454600  |
| H | -3.36522100 | -0.12299500 | -1.09405100 | C | -3.03324200 | -0.01813100 | -0.05316500 |
| H | -3.92742700 | 0.13802700  | 0.55301700  | C | -2.21142500 | 1.28291600  | -0.01009400 |
| O | -0.95712800 | 1.16100300  | 0.07202500  | H | -3.36391600 | -0.12573200 | -1.09565400 |
| H | -2.60857400 | -2.02204800 | -0.00003100 | H | -3.93126600 | 0.13001500  | 0.55048400  |
| O | -2.84604200 | 2.35278800  | -0.11042500 | O | -0.96209800 | 1.16215400  | 0.07687000  |
| C | 2.27971900  | 4.80266300  | -0.44591500 | H | -2.61108900 | -2.02584100 | 0.00276500  |
| C | 3.62556900  | 4.46655200  | -0.52476900 | O | -2.85391600 | 2.34956000  | -0.10279800 |
| C | 4.59044600  | 5.46149400  | -0.67124700 | C | 2.28052900  | 4.80573300  | -0.44427200 |
| C | 4.22740500  | 6.80278400  | -0.74059700 | C | 3.62577300  | 4.46811000  | -0.52480000 |
| C | 2.88109300  | 7.10726400  | -0.65985600 | C | 4.59116100  | 5.46236300  | -0.67261900 |
| C | 1.89931700  | 6.14127400  | -0.51525100 | C | 4.22895900  | 6.80385000  | -0.74167700 |
| H | 3.94675600  | 3.43334400  | -0.47499700 | C | 2.88304200  | 7.10972600  | -0.65924700 |
| H | 4.97688700  | 7.57555600  | -0.85543800 | C | 1.90068300  | 6.14448900  | -0.51316100 |
| H | 0.85427200  | 6.42358800  | -0.45752200 | H | 3.94608500  | 3.43463600  | -0.47542000 |
| N | 2.47689900  | 8.52460100  | -0.72628300 | H | 4.97880200  | 7.57605800  | -0.85761500 |
| H | 2.83304500  | 9.05711700  | 0.07446000  | H | 0.85598800  | 6.42765300  | -0.45402500 |
| H | 2.82311400  | 8.97861500  | -1.57803000 | N | 2.48034300  | 8.52723400  | -0.72579300 |
| C | 6.02270600  | 5.04528800  | -0.75383300 | H | 2.84047500  | 9.06032000  | 0.07279700  |
| O | 6.39409300  | 3.90191700  | -0.69769800 | H | 2.82384600  | 8.97979900  | -1.57943800 |
| O | 6.85100600  | 6.08275700  | -0.89796200 | C | 6.02298800  | 5.04510500  | -0.75708400 |
| H | 7.75950900  | 5.75127200  | -0.94811300 | O | 6.39345800  | 3.90127700  | -0.70131200 |
| H | 1.45782600  | 8.62512700  | -0.72539600 | O | 6.85175300  | 6.08175200  | -0.90240900 |
| I | 0.80228800  | 3.28422200  | -0.21610000 | H | 7.76009100  | 5.74994400  | -0.95372400 |
|   |             |             |             | H | 1.46146000  | 8.62940300  | -0.72102000 |
|   |             |             |             | I | 0.80268500  | 3.28823000  | -0.21297800 |

**Cation-Anion-I Water**

H 7.55237600 5.63747800 -0.78660800

**Neutral-Anion-Cl Vacuum ModRedundant**

N -2.52604100 -1.11555300 -0.01728100  
H -1.62038000 -1.08421200 0.45019400  
C -3.02131200 0.26584200 0.04437000  
C -1.93670400 1.37515900 -0.08196400  
H -3.77789300 0.42772900 -0.72707600  
H -3.52220100 0.42239100 1.00614700  
O -0.74884700 0.98886500 0.03944600  
H -2.27256800 -1.30102300 -0.98384500  
O -2.36869900 2.52965700 -0.25868500  
C 2.16271400 4.36686400 -0.34778400  
C 3.52978600 4.10342600 -0.39631300  
C 4.41341800 5.16797800 -0.54872600  
C 3.96125400 6.48258200 -0.65151000  
C 2.59135500 6.73941300 -0.60271700  
C 1.70091900 5.67492800 -0.44786100  
H 3.90361600 3.09092500 -0.32155500  
H 4.66964500 7.29399500 -0.76280100  
H 0.63158500 5.85362600 -0.40732000  
Cl 1.02747300 3.07664400 -0.18092300  
N 2.11257000 8.05564200 -0.65449400  
H 2.70451500 8.69196800 -1.16770400  
H 1.14897800 8.13158700 -0.94658200  
C 5.86445200 4.85729800 -0.60105900  
O 6.35101100 3.76118400 -0.51044900  
O 6.64157900 5.95616400 -0.76797500

A 15 10 7 120.0 F

**Neutral-Anion-Cl TCM**

N -2.32213900 -1.26736000 0.10802000  
H -1.61382700 -1.06056600 0.80838700  
C -3.12611500 -0.05422600 -0.04942300  
C -2.35389900 1.28934000 -0.07309800  
H -3.71933100 -0.12492700 -0.96337500  
H -3.84246900 0.00899600 0.77649600  
O -1.14795000 1.25848000 0.25823000  
H -1.78775100 -1.40662400 -0.74462700  
O -3.03151100 2.29096600 -0.39990000  
C 2.15177100 4.57612200 -0.33114300  
C 3.48262000 4.19569300 -0.42944500  
C 4.43761600 5.19574000 -0.60466300  
C 4.08034600 6.53804500 -0.68034400  
C 2.73487600 6.90687800 -0.57965700  
C 1.77006100 5.90855400 -0.40233200  
H 3.77792900 3.15662900 -0.37496100  
H 4.84163100 7.29625700 -0.81453100  
H 0.72186500 6.17124200 -0.31965900  
Cl 0.92266700 3.36371500 -0.11710800  
N 2.36444600 8.24646300 -0.59547300  
H 3.00841300 8.86733600 -1.06354400  
H 1.40563300 8.42771800 -0.85551200

C 5.86268900 4.77541000 -0.70975200  
O 6.24733300 3.63542100 -0.64673700  
O 6.70550700 5.80680400 -0.88572000  
H 7.60218600 5.44845500 -0.94120500

H 1.43470700 8.48232500 -0.75244200  
C 5.88657100 4.81726100 -0.68366100  
O 6.26625600 3.67364000 -0.71940200  
O 6.73407800 5.85609100 -0.69138800  
H 7.63565600 5.50675600 -0.72871000

**Neutral-Anion-Cl DCE**

N -2.28465200 -1.15140400 0.52952500  
H -1.34624900 -0.96254700 0.18533000  
C -3.12650100 -0.04109000 0.07980900  
C -2.30667500 1.23005000 -0.24123600  
H -3.68536300 -0.27707200 -0.83472700  
H -3.86485200 0.22295100 0.84149200  
O -1.06769100 1.09504200 -0.35730200  
H -2.58991800 -2.02703800 0.12208700  
O -2.97224900 2.28161700 -0.38258400  
C 2.16104000 4.59436600 -0.56297900  
C 3.49514400 4.21912000 -0.61201400  
C 4.45545100 5.22945100 -0.62739700  
C 4.09834300 6.57299100 -0.59398100  
C 2.74699800 6.93523100 -0.54494300  
C 1.77589200 5.92665700 -0.52898800  
H 3.78924700 3.17864300 -0.63787000  
H 4.86295400 7.33954000 -0.60495700  
H 0.72385300 6.18379700 -0.48873100  
Cl 0.92684700 3.36083600 -0.54097200  
N 2.37498500 8.26878600 -0.45247500  
H 3.04872800 8.93456000 -0.80255900

**Neutral-Anion-Cl Acetone**

N -2.28719200 -1.15062600 0.54468500  
H -1.37834000 -1.03239700 0.10496500  
C -3.13151000 -0.04671900 0.08651200  
C -2.31005500 1.21439000 -0.25877300  
H -3.69972500 -0.29149400 -0.82093600  
H -3.86119000 0.22601100 0.85278300  
O -1.07746500 1.06735400 -0.42066000  
H -2.66183300 -2.04246700 0.24320900  
O -2.96696900 2.27514400 -0.37776200  
C 2.17054800 4.60250900 -0.57744900  
C 3.50441000 4.22751600 -0.62246800  
C 4.46365000 5.23923100 -0.62816100  
C 4.10487100 6.58185000 -0.58892700  
C 2.75259400 6.94328100 -0.54372900  
C 1.78211900 5.93339800 -0.53800500  
H 3.79947200 3.18749700 -0.65297200  
H 4.86843500 7.34949900 -0.59281500  
H 0.72977600 6.18987200 -0.50175700  
Cl 0.93786700 3.36496000 -0.56804100  
N 2.37951900 8.27473900 -0.44495800

|   |            |            |             |   |            |            |             |
|---|------------|------------|-------------|---|------------|------------|-------------|
| H | 3.05612200 | 8.94489400 | -0.78099700 | N | 2.39932200 | 8.29422300 | -0.72937300 |
| H | 1.44106000 | 8.49173900 | -0.74814500 | H | 3.08344400 | 8.92179400 | -1.12696200 |
| C | 5.89572800 | 4.82828000 | -0.68065400 | H | 1.46589000 | 8.48184400 | -1.06611700 |
| O | 6.27450200 | 3.68415200 | -0.72052100 | C | 5.90137600 | 4.83061300 | -0.53384300 |
| O | 6.74151300 | 5.86691600 | -0.67963100 | O | 6.27347400 | 3.68786400 | -0.43366800 |
| H | 7.64469400 | 5.52103000 | -0.71587000 | O | 6.75187300 | 5.85904400 | -0.63949600 |
|   |            |            |             | H | 7.65445200 | 5.51002200 | -0.61891200 |

### Neutral-Anion-Cl DMSO

|    |             |             |             |
|----|-------------|-------------|-------------|
| N  | -2.27645000 | -1.27870800 | 0.08228700  |
| H  | -1.40747300 | -1.01166300 | -0.37188700 |
| C  | -3.14132300 | -0.09847400 | 0.08477600  |
| C  | -2.33499300 | 1.21433200  | 0.16761500  |
| H  | -3.75663100 | -0.01607600 | -0.82164600 |
| H  | -3.82867600 | -0.12647100 | 0.93333300  |
| O  | -1.11536900 | 1.15705100  | -0.10918700 |
| H  | -2.68954000 | -2.02798700 | -0.46070100 |
| O  | -2.99020600 | 2.23763300  | 0.47590900  |
| C  | 2.17420500  | 4.62963400  | -0.47232800 |
| C  | 3.50634300  | 4.24707600  | -0.45477800 |
| C  | 4.47053700  | 5.24968900  | -0.55324400 |
| C  | 4.11773000  | 6.58956600  | -0.66505300 |
| C  | 2.76652100  | 6.95892900  | -0.67949700 |
| C  | 1.79108700  | 5.95813600  | -0.58116800 |
| H  | 3.79679700  | 3.20905200  | -0.36874000 |
| H  | 4.88541000  | 7.34932900  | -0.74181300 |
| H  | 0.73952000  | 6.22010900  | -0.58988300 |
| Cl | 0.93527800  | 3.40399600  | -0.35670300 |

### Neutral-Anion-Cl Water

|   |             |             |             |
|---|-------------|-------------|-------------|
| N | -2.29032300 | -1.15092200 | 0.55848400  |
| H | -1.40407000 | -1.07544000 | 0.06712500  |
| C | -3.13770300 | -0.05225000 | 0.09440100  |
| C | -2.31706200 | 1.19852000  | -0.28270800 |
| H | -3.72072300 | -0.30885700 | -0.80063800 |
| H | -3.85440200 | 0.23358100  | 0.86777000  |
| O | -1.08954800 | 1.04309900  | -0.47392800 |
| H | -2.69856100 | -2.04719000 | 0.31985200  |
| O | -2.96872300 | 2.26372900  | -0.39778700 |
| C | 2.17825200  | 4.60905200  | -0.58726700 |
| C | 3.51172600  | 4.23392800  | -0.63040800 |
| C | 4.47029400  | 5.24656200  | -0.62890800 |
| C | 4.11047300  | 6.58846800  | -0.58428500 |
| C | 2.75762000  | 6.94952200  | -0.54081100 |
| C | 1.78748800  | 5.93890600  | -0.54268800 |
| H | 3.80740300  | 3.19427500  | -0.66521200 |
| H | 4.87332800  | 7.35682500  | -0.58308200 |
| H | 0.73497300  | 6.19495400  | -0.50873900 |



|    |            |            |             |    |            |            |             |
|----|------------|------------|-------------|----|------------|------------|-------------|
| Cl | 0.94616000 | 3.36901800 | -0.58748200 | H  | 0.73759300 | 5.99620700 | -0.42364900 |
| N  | 2.38401500 | 8.27952600 | -0.43599200 | N  | 2.23611700 | 8.17690900 | -0.69550600 |
| H  | 3.06206500 | 8.95252700 | -0.76356800 | H  | 2.83307700 | 8.80128400 | -1.21770800 |
| H  | 1.44660200 | 8.49899200 | -0.74082400 | H  | 1.27355100 | 8.25691600 | -0.99006500 |
| C  | 5.90301200 | 4.83632400 | -0.67975800 | C  | 5.96087800 | 4.94843200 | -0.60589100 |
| O  | 6.28075600 | 3.69170800 | -0.72323400 | O  | 6.44018100 | 3.84986800 | -0.50440700 |
| O  | 6.74761700 | 5.87453800 | -0.67262700 | O  | 6.74685800 | 6.03991400 | -0.78290800 |
| H  | 7.65193100 | 5.53116300 | -0.70876500 | H  | 7.65498500 | 5.71360300 | -0.79696100 |
|    |            |            |             | Br | 0.98216300 | 3.09748300 | -0.14629000 |

#### Neutral-Anion-Br Vacuum

|   |             |             |             |
|---|-------------|-------------|-------------|
| N | -2.45601300 | -1.11453800 | -0.05040300 |
| H | -1.56639400 | -1.05505600 | 0.44347000  |
| C | -3.02617200 | 0.23514000  | 0.03682400  |
| C | -2.00873800 | 1.40653400  | -0.05542900 |
| H | -3.78456400 | 0.37240400  | -0.73736300 |
| H | -3.54203000 | 0.34256200  | 0.99734900  |
| O | -0.79990600 | 1.08554000  | 0.08445300  |
| H | -2.16991600 | -1.25973500 | -1.01462700 |
| O | -2.49592900 | 2.53673400  | -0.22516200 |
| C | 2.25367900  | 4.48856300  | -0.34706500 |
| C | 3.61872400  | 4.21484700  | -0.39343900 |
| C | 4.51245200  | 5.27038400  | -0.55739200 |
| C | 4.07096300  | 6.58750600  | -0.67490100 |
| C | 2.70347100  | 6.85642400  | -0.62933400 |
| C | 1.80414200  | 5.80025000  | -0.46212400 |
| H | 3.98924600  | 3.20190100  | -0.30758700 |
| H | 4.78599400  | 7.39200400  | -0.79476700 |

#### Neutral-Anion-Br TCM

|   |             |             |             |
|---|-------------|-------------|-------------|
| N | -2.33023900 | -1.24463000 | 0.08496600  |
| H | -1.51234700 | -1.09942600 | 0.67115000  |
| C | -3.08303700 | 0.00976200  | 0.07831200  |
| C | -2.27148000 | 1.30853200  | -0.15459500 |
| H | -3.86575900 | -0.04276500 | -0.68240600 |
| H | -3.59683400 | 0.12342700  | 1.03809800  |
| O | -1.02397900 | 1.20025600  | -0.19795900 |
| H | -1.93894500 | -1.38127900 | -0.84269600 |
| O | -2.95137300 | 2.35415800  | -0.25827600 |
| C | 2.22681200  | 4.65200600  | -0.42544800 |
| C | 3.56593500  | 4.28710000  | -0.47388100 |
| C | 4.51978600  | 5.29671700  | -0.59411600 |
| C | 4.15467800  | 6.63740400  | -0.66469600 |
| C | 2.80331400  | 6.99335300  | -0.61402400 |
| C | 1.84034500  | 5.98415700  | -0.49159600 |
| H | 3.87301200  | 3.25110300  | -0.42336200 |

|    |            |            |             |
|----|------------|------------|-------------|
| H  | 4.91431100 | 7.40341000 | -0.75820800 |
| H  | 0.78873400 | 6.24434700 | -0.45016300 |
| N  | 2.42197000 | 8.33091900 | -0.62564400 |
| H  | 3.07740600 | 8.96176700 | -1.06388900 |
| H  | 1.47287600 | 8.50616000 | -0.92301900 |
| C  | 5.95133000 | 4.89004100 | -0.64778600 |
| O  | 6.34403900 | 3.75218100 | -0.59412000 |
| O  | 6.79230400 | 5.93178500 | -0.76475800 |
| H  | 7.69307900 | 5.58069600 | -0.79133300 |
| Br | 0.88847400 | 3.31090000 | -0.28143000 |

|    |            |            |             |
|----|------------|------------|-------------|
| H  | 3.87413900 | 3.27760800 | -0.39295200 |
| H  | 4.93179500 | 7.41940900 | -0.80365600 |
| H  | 0.80845300 | 6.29298200 | -0.37174200 |
| N  | 2.45175000 | 8.36407700 | -0.61278200 |
| H  | 3.10347900 | 8.99034700 | -1.06315900 |
| H  | 1.49712800 | 8.54797400 | -0.88649100 |
| C  | 5.95704000 | 4.89928600 | -0.69259200 |
| O  | 6.33898700 | 3.75735500 | -0.63310600 |
| O  | 6.79967600 | 5.93113600 | -0.84715300 |
| H  | 7.69957100 | 5.57865000 | -0.89444600 |
| Br | 0.90035400 | 3.35778600 | -0.16407300 |

**Neutral-Anion-Br DCE**

|   |             |             |             |
|---|-------------|-------------|-------------|
| N | -2.28314000 | -1.16923700 | 0.34581900  |
| H | -1.31007400 | -0.93815800 | 0.16190700  |
| C | -3.07679100 | -0.00823000 | -0.06067800 |
| C | -2.26161900 | 1.30416800  | -0.03083200 |
| H | -3.46663800 | -0.09597200 | -1.08301600 |
| H | -3.93975600 | 0.12281700  | 0.59704600  |
| O | -1.01489500 | 1.19877000  | 0.04272700  |
| H | -2.51675400 | -1.98177000 | -0.21233300 |
| O | -2.93017600 | 2.35863600  | -0.11230500 |
| C | 2.23955200  | 4.69222800  | -0.36705600 |
| C | 3.57282600  | 4.31496900  | -0.44733000 |
| C | 4.52935700  | 5.31744600  | -0.60513200 |
| C | 4.17069200  | 6.65898800  | -0.68104700 |
| C | 2.82299100  | 7.02625900  | -0.59798300 |
| C | 1.85646800  | 6.02455600  | -0.43851500 |

**Neutral-Anion-Br Acetone**

|   |             |             |             |
|---|-------------|-------------|-------------|
| N | -2.22014800 | -1.18720800 | 0.30163000  |
| H | -1.27533700 | -0.93053500 | 0.02833100  |
| C | -3.08410900 | -0.05316900 | -0.02808600 |
| C | -2.32664400 | 1.29120800  | 0.00770500  |
| H | -3.51879900 | -0.12545600 | -1.03396200 |
| H | -3.91895100 | 0.01496500  | 0.67363100  |
| O | -1.07429200 | 1.24208900  | -0.00562600 |
| H | -2.48232900 | -2.00881000 | -0.23024100 |
| O | -3.04210500 | 2.31842000  | 0.01534800  |
| C | 2.23199600  | 4.72432800  | -0.39128000 |
| C | 3.56083300  | 4.33021500  | -0.45390100 |
| C | 4.53059000  | 5.32202300  | -0.60037400 |
| C | 4.18809400  | 6.66718600  | -0.68186200 |
| C | 2.84335500  | 7.05074200  | -0.61644100 |

|    |            |            |             |
|----|------------|------------|-------------|
| C  | 1.86318200 | 6.06003300 | -0.46881800 |
| H  | 3.84917800 | 3.28955400 | -0.39418700 |
| H  | 4.95904800 | 7.41897800 | -0.79611300 |
| H  | 0.81768900 | 6.34079300 | -0.41585600 |
| N  | 2.48856600 | 8.39160600 | -0.63623900 |
| H  | 3.15510900 | 9.01217500 | -1.07277300 |
| H  | 1.54011100 | 8.58912300 | -0.92165200 |
| C  | 5.95470200 | 4.88663600 | -0.66865900 |
| O  | 6.32001600 | 3.73914500 | -0.60478500 |
| O  | 6.81074700 | 5.90739400 | -0.81029400 |
| H  | 7.70806200 | 5.54657100 | -0.84662300 |
| Br | 0.87585200 | 3.40407200 | -0.19975200 |

**Neutral-Anion-Br DMSO**

|   |             |             |             |
|---|-------------|-------------|-------------|
| N | -2.17723000 | -1.14502600 | 0.25240100  |
| H | -1.20591600 | -0.84719400 | 0.23833000  |
| C | -2.98427400 | -0.01298500 | -0.20315800 |
| C | -2.37942600 | 1.34068600  | 0.21983800  |
| H | -3.08348800 | 0.03260700  | -1.29662500 |
| H | -3.99554900 | -0.07445600 | 0.20474900  |
| O | -1.17224100 | 1.34841500  | 0.55625700  |
| H | -2.26753700 | -1.92998100 | -0.38227700 |
| O | -3.14849800 | 2.32750200  | 0.15405400  |
| C | 2.19632000  | 4.72380000  | -0.30725400 |
| C | 3.51645200  | 4.30939900  | -0.40407700 |
| C | 4.49220600  | 5.28425500  | -0.61296500 |
| C | 4.16314600  | 6.63065300  | -0.72212900 |

|    |            |            |             |
|----|------------|------------|-------------|
| C  | 2.82595100 | 7.03383900 | -0.62325900 |
| C  | 1.83946900 | 6.06060400 | -0.41302400 |
| H  | 3.79409600 | 3.26747900 | -0.32203200 |
| H  | 4.93885900 | 7.36913100 | -0.88210200 |
| H  | 0.80018200 | 6.35653600 | -0.33168100 |
| N  | 2.48713600 | 8.37735300 | -0.66984800 |
| H  | 3.14786900 | 8.97832000 | -1.14119300 |
| H  | 1.53253100 | 8.58067200 | -0.92979900 |
| C  | 5.90818700 | 4.82814000 | -0.71518100 |
| O  | 6.25951000 | 3.67727000 | -0.63323500 |
| O  | 6.77127700 | 5.83307400 | -0.90924500 |
| H  | 7.66342800 | 5.46144800 | -0.96390400 |
| Br | 0.83195400 | 3.43053900 | -0.01352000 |

**Neutral-Anion-Br Water**

|   |             |             |             |
|---|-------------|-------------|-------------|
| N | -2.22235900 | -1.18651200 | 0.31715900  |
| H | -1.28696000 | -0.96021300 | -0.00863400 |
| C | -3.08931800 | -0.06260300 | -0.03683000 |
| C | -2.34229100 | 1.28565600  | 0.00428000  |
| H | -3.50590000 | -0.14361900 | -1.05022400 |
| H | -3.93658400 | 0.00003300  | 0.64990900  |
| O | -1.08957100 | 1.24714900  | -0.00961200 |
| H | -2.51737400 | -2.03228900 | -0.15683500 |
| O | -3.06394200 | 2.30953800  | 0.01341500  |
| C | 2.23947500  | 4.73126800  | -0.38955200 |
| C | 3.56749900  | 4.33591900  | -0.45393700 |
| C | 4.53709700  | 5.32802200  | -0.60138200 |

|    |            |            |             |
|----|------------|------------|-------------|
| C  | 4.19457900 | 6.67301900 | -0.68156800 |
| C  | 2.84976600 | 7.05737100 | -0.61389500 |
| C  | 1.86942100 | 6.06653200 | -0.46584800 |
| H  | 3.85567900 | 3.29520600 | -0.39537500 |
| H  | 4.96520900 | 7.42493700 | -0.79711800 |
| H  | 0.82412200 | 6.34761700 | -0.41202600 |
| N  | 2.49564800 | 8.39756300 | -0.63166800 |
| H  | 3.16276300 | 9.01966300 | -1.06534300 |
| H  | 1.54713000 | 8.59697700 | -0.91576100 |
| C  | 5.96130200 | 4.89213100 | -0.67249100 |
| O  | 6.32488200 | 3.74379400 | -0.60879300 |
| O  | 6.81651700 | 5.91190300 | -0.81614300 |
| H  | 7.71457500 | 5.55278700 | -0.85517000 |
| Br | 0.88305000 | 3.41022900 | -0.19743600 |

|   |            |            |             |
|---|------------|------------|-------------|
| C | 4.61959700 | 5.40395000 | -0.67407700 |
| C | 4.22348100 | 6.73489600 | -0.80292100 |
| C | 2.86545600 | 7.04511200 | -0.78790600 |
| C | 1.93067200 | 6.01395000 | -0.64888000 |
| H | 4.03100500 | 3.35884200 | -0.43301500 |
| H | 4.96532400 | 7.51551100 | -0.91994900 |
| H | 0.87230000 | 6.25764600 | -0.64215500 |
| N | 2.43613300 | 8.37038500 | -0.96554200 |
| H | 1.50916800 | 8.54907300 | -0.60666400 |
| H | 3.09332200 | 9.06284400 | -0.63685400 |
| C | 6.05715300 | 5.03732100 | -0.68147900 |
| O | 6.50133400 | 3.92351300 | -0.58169400 |
| O | 6.88311800 | 6.10643400 | -0.81539000 |
| H | 7.77980400 | 5.74995200 | -0.80993300 |
| I | 0.83643600 | 3.15290300 | -0.28213200 |

**Neutral-Anion-I Vacuum**

|   |             |             |             |
|---|-------------|-------------|-------------|
| N | -2.34305600 | -1.15347100 | 0.04714600  |
| H | -1.44190700 | -1.03385200 | 0.50646800  |
| C | -3.01245000 | 0.14571700  | 0.15722700  |
| C | -2.11253300 | 1.39555400  | -0.02135100 |
| H | -3.82961100 | 0.20812600  | -0.56482200 |
| H | -3.47014300 | 0.22965200  | 1.14870900  |
| O | -0.86788100 | 1.17306500  | 0.01975400  |
| H | -2.08742000 | -1.28277000 | -0.92765800 |
| O | -2.69118300 | 2.48086600  | -0.15574700 |
| C | 2.32495800  | 4.68612800  | -0.51802600 |
| C | 3.68502700  | 4.37993700  | -0.53242700 |

**Neutral-Anion-I TCM**

|   |             |             |             |
|---|-------------|-------------|-------------|
| N | -2.34104300 | -1.23529800 | -0.02912200 |
| H | -1.58221700 | -1.15071100 | 0.64239700  |
| C | -3.07684300 | 0.02839700  | -0.01044900 |
| C | -2.23323100 | 1.32523500  | -0.02968000 |
| H | -3.76634800 | 0.05962400  | -0.85700400 |
| H | -3.69670600 | 0.06782300  | 0.89114100  |
| O | -0.99352500 | 1.19417300  | 0.13242800  |
| H | -1.86699900 | -1.31236000 | -0.92432500 |
| O | -2.87016600 | 2.38778300  | -0.18234800 |
| C | 2.34246000  | 4.78539500  | -0.38434300 |

|   |            |            |             |   |            |            |             |
|---|------------|------------|-------------|---|------------|------------|-------------|
| C | 3.68525000 | 4.42946400 | -0.44127400 | C | 2.35409200 | 4.83067600 | -0.36320100 |
| C | 4.63942900 | 5.43405600 | -0.60106900 | C | 3.68675200 | 4.45579900 | -0.48135800 |
| C | 4.27309700 | 6.77268900 | -0.70424100 | C | 4.64890900 | 5.45389500 | -0.63747200 |
| C | 2.92273100 | 7.12699000 | -0.64704900 | C | 4.29856800 | 6.79974600 | -0.67480100 |
| C | 1.96361200 | 6.11861200 | -0.48375200 | C | 2.95611400 | 7.17136900 | -0.55423200 |
| H | 4.00378900 | 3.39806800 | -0.36625700 | C | 1.98760500 | 6.17016500 | -0.39690900 |
| H | 5.03093600 | 7.53660100 | -0.82672600 | H | 3.99144100 | 3.41785800 | -0.45798300 |
| H | 0.91475400 | 6.39122300 | -0.43600700 | H | 5.06177200 | 7.55844900 | -0.79621600 |
| N | 2.53786500 | 8.46475800 | -0.69125300 | H | 0.94552500 | 6.45478100 | -0.30218700 |
| H | 3.18595900 | 9.08169700 | -1.15939800 | N | 2.59155800 | 8.51268000 | -0.52967900 |
| H | 1.58590500 | 8.62705400 | -0.98721800 | H | 3.23592700 | 9.14329700 | -0.98483900 |
| C | 6.07001000 | 5.02706100 | -0.65826700 | H | 1.63299700 | 8.70494100 | -0.78375400 |
| O | 6.46629900 | 3.89157100 | -0.57834400 | C | 6.07085900 | 5.02880000 | -0.76616900 |
| O | 6.91016900 | 6.06585500 | -0.81097100 | O | 6.44827600 | 3.88373000 | -0.73854800 |
| H | 7.81034100 | 5.71331600 | -0.83645800 | O | 6.91764600 | 6.05822500 | -0.91974700 |
| I | 0.84257600 | 3.28221300 | -0.14972800 | H | 7.81346500 | 5.70006900 | -0.99399500 |
|   |            |            |             | I | 0.84474800 | 3.33932700 | -0.13567900 |

**Neutral-Anion-I DCE**

|   |             |             |             |
|---|-------------|-------------|-------------|
| N | -2.35847100 | -1.09303200 | 0.53030400  |
| H | -1.36793800 | -0.86445100 | 0.51184900  |
| C | -3.05568700 | -0.01923700 | -0.17878500 |
| C | -2.25910300 | 1.30320700  | -0.18225600 |
| H | -3.24422100 | -0.25700200 | -1.23356800 |
| H | -4.02790800 | 0.18176600  | 0.27853000  |
| O | -1.05119500 | 1.23727100  | 0.15782100  |
| H | -2.47881900 | -1.97940700 | 0.05512100  |
| O | -2.88481100 | 2.31836500  | -0.55156100 |

**Neutral-Anion-I Acetone**

|   |             |             |             |
|---|-------------|-------------|-------------|
| N | -2.32364100 | -1.10710800 | 0.51771400  |
| H | -1.33412400 | -0.88478600 | 0.45352300  |
| C | -3.05010700 | -0.05143700 | -0.18782800 |
| C | -2.31550800 | 1.30315400  | -0.13166700 |
| H | -3.19354500 | -0.26799200 | -1.25512800 |
| H | -4.04392400 | 0.08809700  | 0.24390100  |
| O | -1.10117000 | 1.27668600  | 0.18851900  |
| H | -2.46766200 | -2.00537300 | 0.07144300  |

|   |             |            |             |   |             |             |             |
|---|-------------|------------|-------------|---|-------------|-------------|-------------|
| O | -2.98976600 | 2.30761600 | -0.44423000 | H | -2.63033400 | -2.01358100 | -0.06645000 |
| C | 2.35033900  | 4.85594000 | -0.36127100 | O | -2.91490100 | 2.35804700  | -0.13537900 |
| C | 3.67786800  | 4.46679600 | -0.48540100 | C | 2.37397900  | 4.83060000  | -0.40483400 |
| C | 4.64841000  | 5.45637200 | -0.64581900 | C | 3.71133100  | 4.46488600  | -0.48609600 |
| C | 4.31034200  | 6.80513400 | -0.68108000 | C | 4.66751300  | 5.47122000  | -0.62777000 |
| C | 2.97165900  | 7.19014100 | -0.55459100 | C | 4.30568200  | 6.81269100  | -0.68699000 |
| C | 1.99405400  | 6.19798400 | -0.39327700 | C | 2.95670200  | 7.17418100  | -0.60343200 |
| H | 3.97234400  | 3.42597300 | -0.46331100 | C | 1.99331200  | 6.16509900  | -0.46086400 |
| H | 5.07973900  | 7.55700500 | -0.80596800 | H | 4.02448400  | 3.43021600  | -0.44398900 |
| H | 0.95525600  | 6.49238900 | -0.29406200 | H | 5.06428900  | 7.57751700  | -0.79787000 |
| N | 2.62076600  | 8.53374900 | -0.52745800 | H | 0.94670400  | 6.44076000  | -0.39489900 |
| H | 3.27137100  | 9.16020600 | -0.97965600 | N | 2.58059700  | 8.51061500  | -0.59913100 |
| H | 1.66350800  | 8.73783700 | -0.77739800 | H | 3.23228900  | 9.14619400  | -1.03702200 |
| C | 6.06599000  | 5.01713900 | -0.78166200 | H | 1.62720500  | 8.69518800  | -0.87737900 |
| O | 6.42986400  | 3.86724800 | -0.75746100 | C | 6.09686200  | 5.05826900  | -0.71531600 |
| O | 6.92129500  | 6.03730400 | -0.93710000 | O | 6.48049500  | 3.91522400  | -0.67177800 |
| H | 7.81434200  | 5.67288300 | -1.01718800 | O | 6.93682800  | 6.09323000  | -0.84931700 |
| I | 0.83040200  | 3.37832900 | -0.12286200 | H | 7.83917200  | 5.74672700  | -0.89966300 |
|   |             |            |             | I | 0.87713900  | 3.32527400  | -0.18987300 |

**Neutral-Anion-I DMSO**

|   |             |             |             |
|---|-------------|-------------|-------------|
| N | -2.32091400 | -1.16257600 | 0.38878300  |
| H | -1.34839500 | -1.01397800 | 0.13557300  |
| C | -3.07941700 | -0.00999900 | -0.09694000 |
| C | -2.26335000 | 1.29577600  | -0.03478900 |
| H | -3.39614300 | -0.11300300 | -1.14411300 |
| H | -3.98593800 | 0.13018700  | 0.49601700  |
| O | -1.01708700 | 1.18252100  | 0.07420400  |

**Neutral-Anion-I Water**

|   |             |             |             |
|---|-------------|-------------|-------------|
| N | -2.32435900 | -1.11584100 | 0.50468100  |
| H | -1.33252300 | -0.91452700 | 0.41544200  |
| C | -3.04866300 | -0.05755000 | -0.19877200 |
| C | -2.32458400 | 1.30000100  | -0.11519300 |
| H | -3.17631500 | -0.26174500 | -1.27076800 |
| H | -4.04909400 | 0.06774600  | 0.22153600  |

|   |             |             |             |    |             |             |             |
|---|-------------|-------------|-------------|----|-------------|-------------|-------------|
| O | -1.11282000 | 1.27900300  | 0.21422600  | H  | -3.91923700 | -0.33694700 | 0.73458800  |
| H | -2.49555600 | -2.01678900 | 0.07319200  | O  | -1.43071900 | 1.38401300  | 0.49414400  |
| O | -3.00275400 | 2.30564000  | -0.41875100 | H  | -1.67921400 | -1.07888400 | -0.99036800 |
| C | 2.35340900  | 4.86133900  | -0.36058200 | O  | -3.48239900 | 2.22244100  | 0.11867100  |
| C | 3.68123200  | 4.47132100  | -0.47492700 | C  | 2.22808000  | 4.54367100  | -0.31955100 |
| C | 4.65160900  | 5.46106800  | -0.63684700 | C  | 3.56438600  | 4.18198200  | -0.40649300 |
| C | 4.31247900  | 6.80897900  | -0.68295100 | C  | 4.51493700  | 5.18517800  | -0.60471100 |
| C | 2.97257900  | 7.19432500  | -0.56609400 | C  | 4.11524900  | 6.51122500  | -0.71536000 |
| C | 1.99469900  | 6.20228700  | -0.40348500 | C  | 2.76549200  | 6.86466400  | -0.63281400 |
| H | 3.97625200  | 3.43096200  | -0.44398000 | C  | 1.81135200  | 5.86404700  | -0.42867900 |
| H | 5.08164300  | 7.56082600  | -0.80924800 | H  | 3.88089200  | 3.15083200  | -0.32418500 |
| H | 0.95519700  | 6.49645200  | -0.31194200 | H  | 4.87919700  | 7.26562000  | -0.86683300 |
| N | 2.62099400  | 8.53701400  | -0.54910600 | H  | 0.75853200  | 6.10964900  | -0.35315900 |
| H | 3.27490800  | 9.16245900  | -0.99809500 | Cl | 1.00498300  | 3.31670600  | -0.05742900 |
| H | 1.66529700  | 8.74039700  | -0.80564400 | N  | 2.37472200  | 8.20926600  | -0.69234400 |
| C | 6.07061800  | 5.02197900  | -0.76170500 | H  | 3.02157400  | 8.80037600  | -1.19552700 |
| O | 6.43339000  | 3.87164100  | -0.73054900 | H  | 1.42722100  | 8.35406500  | -1.01246200 |
| O | 6.92564700  | 6.04135300  | -0.91486600 | C  | 6.01258000  | 4.83144100  | -0.70149100 |
| H | 7.82029700  | 5.67909000  | -0.98835700 | O  | 6.30015100  | 3.61930400  | -0.61330000 |
| I | 0.83452300  | 3.38385700  | -0.11652800 | O  | 6.79400700  | 5.79544300  | -0.85773900 |

**Anion-Anion-Cl Vacuum SP**

|   |             |             |             |
|---|-------------|-------------|-------------|
| N | -2.23769900 | -1.21586300 | -0.15293600 |
| H | -1.57383700 | -1.08203100 | 0.60593800  |
| C | -3.20774900 | -0.12318700 | -0.06991900 |
| C | -2.64194900 | 1.29522300  | 0.19998600  |
| H | -3.79278600 | -0.08742100 | -0.99196200 |

**Anion-Anion-Cl TCM**

|   |             |             |             |
|---|-------------|-------------|-------------|
| N | -2.23769900 | -1.21586300 | -0.15293600 |
| H | -1.57383700 | -1.08203100 | 0.60593800  |
| C | -3.20774900 | -0.12318700 | -0.06991900 |
| C | -2.64194900 | 1.29522300  | 0.19998600  |
| H | -3.79278600 | -0.08742100 | -0.99196200 |

|    |             |             |             |    |             |             |             |
|----|-------------|-------------|-------------|----|-------------|-------------|-------------|
| H  | -3.91923700 | -0.33694700 | 0.73458800  | H  | -4.01605000 | 0.04286300  | 0.68137000  |
| O  | -1.43071900 | 1.38401300  | 0.49414400  | O  | -1.10192900 | 1.09938600  | 0.09003000  |
| H  | -1.67921400 | -1.07888400 | -0.99036800 | H  | -2.62195600 | -2.01240600 | -0.38074400 |
| O  | -3.48239900 | 2.22244100  | 0.11867100  | O  | -2.99871300 | 2.29655900  | 0.02282200  |
| C  | 2.22808000  | 4.54367100  | -0.31955100 | C  | 2.19968200  | 4.59274300  | -0.38330400 |
| C  | 3.56438600  | 4.18198200  | -0.40649300 | C  | 3.53496400  | 4.22367500  | -0.45299900 |
| C  | 4.51493700  | 5.18517800  | -0.60471100 | C  | 4.49630200  | 5.22595300  | -0.59533700 |
| C  | 4.11524900  | 6.51122500  | -0.71536000 | C  | 4.10877000  | 6.55851600  | -0.66559100 |
| C  | 2.76549200  | 6.86466400  | -0.63281400 | C  | 2.75922800  | 6.92005500  | -0.59723600 |
| C  | 1.81135200  | 5.86404700  | -0.42867900 | C  | 1.79367700  | 5.91849300  | -0.45155100 |
| H  | 3.88089200  | 3.15083200  | -0.32418500 | H  | 3.83932900  | 3.18697300  | -0.40038300 |
| H  | 4.87919700  | 7.26562000  | -0.86683300 | H  | 4.87711200  | 7.31512200  | -0.77687400 |
| H  | 0.75853200  | 6.10964900  | -0.35315900 | H  | 0.74145100  | 6.17091800  | -0.39187200 |
| Cl | 1.00498300  | 3.31670600  | -0.05742900 | Cl | 0.97073200  | 3.35506600  | -0.20739100 |
| N  | 2.37472200  | 8.20926600  | -0.69234400 | N  | 2.38026000  | 8.26559800  | -0.61243400 |
| H  | 3.02157400  | 8.80037600  | -1.19552700 | H  | 3.04029600  | 8.87682400  | -1.07273400 |
| H  | 1.42722100  | 8.35406500  | -1.01246200 | H  | 1.43824500  | 8.43466600  | -0.93695700 |
| C  | 6.01258000  | 4.83144100  | -0.70149100 | C  | 5.98926600  | 4.86001100  | -0.67792700 |
| O  | 6.30015100  | 3.61930400  | -0.61330000 | O  | 6.26538700  | 3.64170200  | -0.63606800 |
| O  | 6.79400700  | 5.79544300  | -0.85773900 | O  | 6.78784900  | 5.81766200  | -0.77918700 |

**Anion-Anion-Cl DCE**

|   |             |             |             |
|---|-------------|-------------|-------------|
| N | -2.40407400 | -1.26740600 | 0.26976500  |
| H | -1.42785800 | -1.01636100 | 0.13187600  |
| C | -3.18878900 | -0.06674900 | -0.02516100 |
| C | -2.34530700 | 1.22818300  | 0.04325100  |
| H | -3.63010500 | -0.08723500 | -1.02930000 |

**Anion-Anion-Cl Acetone**

|   |             |             |             |
|---|-------------|-------------|-------------|
| N | -2.41425200 | -1.25333400 | 0.36118200  |
| H | -1.44805800 | -1.06908400 | 0.10455400  |
| C | -3.19242200 | -0.07772900 | -0.03193800 |
| C | -2.35017700 | 1.21650800  | -0.00940600 |
| H | -3.59802600 | -0.15416600 | -1.04967900 |



|    |             |             |             |    |             |             |             |
|----|-------------|-------------|-------------|----|-------------|-------------|-------------|
| H  | -4.04330300 | 0.06384300  | 0.63867400  | H  | -4.11983900 | 0.16248700  | 0.47763800  |
| O  | -1.10553500 | 1.08919700  | 0.01573100  | O  | -1.08367000 | 0.97764300  | 0.02784600  |
| H  | -2.71694900 | -2.07498800 | -0.14863000 | H  | -2.87411200 | -2.10974600 | 0.08923300  |
| O  | -3.00017700 | 2.28747500  | -0.05062200 | O  | -2.89608500 | 2.24555200  | -0.34092800 |
| C  | 2.20655000  | 4.60288400  | -0.42045900 | C  | 2.23692700  | 4.61736800  | -0.39586200 |
| C  | 3.54129800  | 4.23275400  | -0.48815400 | C  | 3.57058000  | 4.25471000  | -0.50493900 |
| C  | 4.50421000  | 5.23694100  | -0.60412600 | C  | 4.52436100  | 5.26591500  | -0.63487400 |
| C  | 4.11871900  | 6.57111800  | -0.64910200 | C  | 4.13059400  | 6.59826000  | -0.65166700 |
| C  | 2.76865100  | 6.93347900  | -0.58093000 | C  | 2.78076500  | 6.95249900  | -0.54081400 |
| C  | 1.80097800  | 5.92944200  | -0.46361800 | C  | 1.82175300  | 5.94124400  | -0.40996900 |
| H  | 3.84341900  | 3.19469200  | -0.45421600 | H  | 3.87916500  | 3.21812300  | -0.49345100 |
| H  | 4.88661500  | 7.33066600  | -0.74064700 | H  | 4.88988700  | 7.36488500  | -0.75471700 |
| H  | 0.74866400  | 6.18212800  | -0.40693200 | H  | 0.77017800  | 6.18718000  | -0.32099800 |
| Cl | 0.97673900  | 3.36023700  | -0.27978400 | Cl | 1.01982900  | 3.36317500  | -0.24002100 |
| N  | 2.39219500  | 8.27751300  | -0.56778400 | N  | 2.39823800  | 8.29291800  | -0.49831800 |
| H  | 3.05481700  | 8.90183400  | -1.00630200 | H  | 3.04532400  | 8.92903600  | -0.94302400 |
| H  | 1.45035000  | 8.45838400  | -0.88620700 | H  | 1.44638000  | 8.47469900  | -0.78488200 |
| C  | 5.99546000  | 4.86853400  | -0.68556100 | C  | 6.01328800  | 4.90362000  | -0.76239600 |
| O  | 6.26932700  | 3.64874900  | -0.65763600 | O  | 6.29190100  | 3.68435500  | -0.74975100 |
| O  | 6.79867400  | 5.82373500  | -0.77234400 | O  | 6.81196600  | 5.86086600  | -0.86666500 |

**Anion-Anion-Cl DMSO**

|   |             |             |             |
|---|-------------|-------------|-------------|
| N | -2.54660600 | -1.24657900 | 0.50715200  |
| H | -1.55688200 | -1.15758100 | 0.29466700  |
| C | -3.21963600 | -0.09144300 | -0.08708100 |
| C | -2.31309200 | 1.15680400  | -0.12466000 |
| H | -3.53344600 | -0.26517600 | -1.12545500 |

**Anion-Anion-Cl Water**

|   |             |             |             |
|---|-------------|-------------|-------------|
| N | -2.42281000 | -1.27741900 | 0.39109900  |
| H | -1.49045800 | -1.15179300 | 0.00729500  |
| C | -3.21018500 | -0.10477600 | 0.00962100  |
| C | -2.35197700 | 1.17472000  | -0.06607000 |
| H | -3.68340300 | -0.20745800 | -0.97659800 |

|    |             |             |             |    |             |             |             |
|----|-------------|-------------|-------------|----|-------------|-------------|-------------|
| H  | -4.01285200 | 0.06813900  | 0.73007500  | H  | -3.81182800 | -0.22757100 | 0.76359300  |
| O  | -1.11019400 | 1.03086500  | -0.13107200 | O  | -1.19349300 | 1.30316900  | 0.63634800  |
| H  | -2.81122100 | -2.12022800 | -0.01635800 | H  | -1.61575200 | -1.06713500 | -0.97295000 |
| O  | -2.98786000 | 2.25549300  | -0.09058000 | O  | -3.16831300 | 2.31810700  | 0.28840100  |
| C  | 2.21232300  | 4.63039900  | -0.46109500 | C  | 2.20121000  | 4.65839700  | -0.39930700 |
| C  | 3.54563200  | 4.25367300  | -0.51164100 | C  | 3.52871400  | 4.26205400  | -0.48864300 |
| C  | 4.51458600  | 5.25486100  | -0.59836000 | C  | 4.50440000  | 5.23249400  | -0.72613100 |
| C  | 4.13621900  | 6.59139500  | -0.63151900 | C  | 4.13769600  | 6.56460500  | -0.87598100 |
| C  | 2.78647900  | 6.95987200  | -0.57944200 | C  | 2.79900400  | 6.95538400  | -0.78878100 |
| C  | 1.81222200  | 5.95852700  | -0.49200500 | C  | 1.82044900  | 5.98663500  | -0.54715400 |
| H  | 3.84150200  | 3.21367900  | -0.48754700 | H  | 3.82379400  | 3.22776200  | -0.37486100 |
| H  | 4.90775100  | 7.34949700  | -0.70112400 | H  | 4.91777500  | 7.29498800  | -1.05903300 |
| H  | 0.76034100  | 6.21580300  | -0.44988000 | H  | 0.77634200  | 6.26873700  | -0.47540200 |
| Cl | 0.97646700  | 3.38843900  | -0.35966400 | N  | 2.43084700  | 8.29295300  | -0.99585600 |
| N  | 2.41673800  | 8.30387700  | -0.55192500 | H  | 1.56677700  | 8.55949200  | -0.54447400 |
| H  | 3.08883100  | 8.93410400  | -0.96708800 | H  | 3.16584900  | 8.95404700  | -0.78570600 |
| H  | 1.47969800  | 8.49656000  | -0.87749400 | C  | 5.99253000  | 4.83595200  | -0.81173900 |
| C  | 6.00392900  | 4.87820000  | -0.65945900 | O  | 6.24671900  | 3.61801100  | -0.70329900 |
| O  | 6.27097400  | 3.65639300  | -0.63322100 | O  | 6.80106700  | 5.77577800  | -0.97785300 |
| O  | 6.81503600  | 5.82799100  | -0.72988400 | Br | 0.84151900  | 3.36395300  | -0.04882600 |

**Anion-Anion-Br Vacuum SP**

|   |             |             |             |
|---|-------------|-------------|-------------|
| N | -2.17954500 | -1.18657400 | -0.13641800 |
| H | -1.50523600 | -1.11467700 | 0.62190900  |
| C | -3.07079400 | -0.03175400 | -0.01853700 |
| C | -2.40591000 | 1.32490800  | 0.32808100  |
| H | -3.63310400 | 0.09065000  | -0.94738100 |

**Anion-Anion-Br TCM**

|   |             |             |             |
|---|-------------|-------------|-------------|
| N | -2.17954500 | -1.18657400 | -0.13641800 |
| H | -1.50523600 | -1.11467700 | 0.62190900  |
| C | -3.07079400 | -0.03175400 | -0.01853700 |
| C | -2.40591000 | 1.32490800  | 0.32808100  |
| H | -3.63310400 | 0.09065000  | -0.94738100 |

|    |             |             |             |    |             |             |             |
|----|-------------|-------------|-------------|----|-------------|-------------|-------------|
| H  | -3.81182800 | -0.22757100 | 0.76359300  | H  | -4.08382200 | 0.02513100  | 0.55222000  |
| O  | -1.19349300 | 1.30316900  | 0.63634800  | O  | -1.14213900 | 1.12612200  | 0.18967800  |
| H  | -1.61575200 | -1.06713500 | -0.97295000 | H  | -2.59223500 | -2.03874700 | -0.28689100 |
| O  | -3.16831300 | 2.31810700  | 0.28840100  | O  | -3.05000900 | 2.28509100  | -0.04569300 |
| C  | 2.20121000  | 4.65839700  | -0.39930700 | C  | 2.30222500  | 4.70922900  | -0.39386700 |
| C  | 3.52871400  | 4.26205400  | -0.48864300 | C  | 3.63674500  | 4.33801200  | -0.47675000 |
| C  | 4.50440000  | 5.23249400  | -0.72613100 | C  | 4.59938500  | 5.33909200  | -0.62406000 |
| C  | 4.13769600  | 6.56460500  | -0.87598100 | C  | 4.21427400  | 6.67263300  | -0.68650300 |
| C  | 2.79900400  | 6.95538400  | -0.78878100 | C  | 2.86636500  | 7.03701100  | -0.60598200 |
| C  | 1.82044900  | 5.98663500  | -0.54715400 | C  | 1.89938100  | 6.03692500  | -0.45505000 |
| H  | 3.82379400  | 3.22776200  | -0.37486100 | H  | 3.94448000  | 3.30210700  | -0.42947400 |
| H  | 4.91777500  | 7.29498800  | -1.05903300 | H  | 4.98347200  | 7.42807500  | -0.80018900 |
| H  | 0.77634200  | 6.26873700  | -0.47540200 | H  | 0.84977300  | 6.29750400  | -0.38490700 |
| N  | 2.43084700  | 8.29295300  | -0.99585600 | N  | 2.49029400  | 8.38349800  | -0.61274800 |
| H  | 1.56677700  | 8.55949200  | -0.54447400 | H  | 3.14789800  | 8.99542200  | -1.07557800 |
| H  | 3.16584900  | 8.95404700  | -0.78570600 | H  | 1.54597700  | 8.55596200  | -0.92865200 |
| C  | 5.99253000  | 4.83595200  | -0.81173900 | C  | 6.09125600  | 4.97042100  | -0.71880300 |
| O  | 6.24671900  | 3.61801100  | -0.70329900 | O  | 6.36564500  | 3.75165400  | -0.67938300 |
| O  | 6.80106700  | 5.77577800  | -0.97785300 | O  | 6.89043100  | 5.92689900  | -0.82587500 |
| Br | 0.84151900  | 3.36395300  | -0.04882600 | Br | 0.96186500  | 3.36628500  | -0.18237700 |

**Anion-Anion-Br DCE**

|   |             |             |             |
|---|-------------|-------------|-------------|
| N | -2.41360600 | -1.25686100 | 0.33167700  |
| H | -1.43305400 | -1.00490900 | 0.23364200  |
| C | -3.19048400 | -0.08212100 | -0.06890400 |
| C | -2.38145500 | 1.23045400  | 0.04499900  |
| H | -3.53194600 | -0.13452100 | -1.11053100 |

**Anion-Anion-Br Acetone**

|   |             |             |             |
|---|-------------|-------------|-------------|
| N | -2.34665100 | -1.24645300 | 0.13972700  |
| H | -1.36585400 | -0.99706200 | 0.04426800  |
| C | -3.12281100 | -0.03001100 | -0.10344700 |
| C | -2.33467700 | 1.25034800  | 0.24817700  |
| H | -3.42332900 | 0.08226400  | -1.15363700 |

|    |             |             |             |    |             |             |             |
|----|-------------|-------------|-------------|----|-------------|-------------|-------------|
| H  | -4.04056200 | -0.03110400 | 0.48990800  | H  | -4.03943700 | -0.03831900 | 0.47418800  |
| O  | -1.09660200 | 1.13654200  | 0.39848000  | O  | -1.09843500 | 1.15033200  | 0.39711100  |
| H  | -2.55380800 | -1.95330400 | -0.55586000 | H  | -2.56953200 | -1.97476000 | -0.50351300 |
| O  | -3.01152300 | 2.30206000  | 0.32025900  | O  | -3.02296900 | 2.29881600  | 0.32287400  |
| C  | 2.27430600  | 4.69801300  | -0.32388900 | C  | 2.26805600  | 4.70429400  | -0.33301700 |
| C  | 3.60914200  | 4.32587000  | -0.39431000 | C  | 3.60139300  | 4.32693700  | -0.40168400 |
| C  | 4.56829700  | 5.32032200  | -0.59748300 | C  | 4.56457700  | 5.31866000  | -0.59947000 |
| C  | 4.17991000  | 6.64795400  | -0.72794400 | C  | 4.18166400  | 6.64828000  | -0.72576600 |
| C  | 2.83074800  | 7.01318200  | -0.66052200 | C  | 2.83345100  | 7.01869500  | -0.65978800 |
| C  | 1.86706200  | 6.01920700  | -0.45258900 | C  | 1.86551600  | 6.02706500  | -0.45798300 |
| H  | 3.91967900  | 3.29470000  | -0.29597700 | H  | 3.90745600  | 3.29427600  | -0.30559400 |
| H  | 4.94489400  | 7.40008900  | -0.88385100 | H  | 4.94882900  | 7.39897800  | -0.87736200 |
| H  | 0.81710200  | 6.28105600  | -0.39295400 | H  | 0.81649400  | 6.29292100  | -0.39999300 |
| N  | 2.45164400  | 8.35471900  | -0.73594300 | N  | 2.45989900  | 8.36083600  | -0.72960500 |
| H  | 3.10524800  | 8.94739200  | -1.22849100 | H  | 3.11643100  | 8.95563700  | -1.21563400 |
| H  | 1.50406400  | 8.51185800  | -1.04996200 | H  | 1.51270900  | 8.52487900  | -1.04124600 |
| C  | 6.05861600  | 4.94711800  | -0.67574500 | C  | 6.05262700  | 4.93866800  | -0.67562200 |
| O  | 6.33237700  | 3.72981500  | -0.59084600 | O  | 6.32057200  | 3.71927500  | -0.59771000 |
| O  | 6.86125500  | 5.89647600  | -0.81568000 | O  | 6.86159700  | 5.88387100  | -0.80705300 |
| Br | 0.94218800  | 3.35931600  | -0.04169300 | Br | 0.93195600  | 3.36827600  | -0.05593300 |

**Anion-Anion-Br DMSO**

|   |             |             |             |
|---|-------------|-------------|-------------|
| N | -2.33368600 | -1.24261200 | 0.15614600  |
| H | -1.35556200 | -1.00495200 | 0.01681300  |
| C | -3.11403300 | -0.03325600 | -0.10656800 |
| C | -2.33798000 | 1.25198600  | 0.24816700  |
| H | -3.40087800 | 0.07158200  | -1.16176300 |

**Anion-Anion-Br Water**

|   |             |             |             |
|---|-------------|-------------|-------------|
| N | -2.32545600 | -1.24154800 | 0.15687100  |
| H | -1.34968700 | -1.00472100 | 0.00099600  |
| C | -3.11125000 | -0.03554100 | -0.10469000 |
| C | -2.34057200 | 1.25225000  | 0.25075600  |
| H | -3.39933300 | 0.06910800  | -1.15967000 |

|    |             |             |             |   |             |             |             |
|----|-------------|-------------|-------------|---|-------------|-------------|-------------|
| H  | -4.03616100 | -0.04565300 | 0.47664100  | H | -3.50409800 | -0.59752600 | 0.95958600  |
| O  | -1.09980700 | 1.15706200  | 0.39440000  | O | -1.60152200 | 1.62361400  | 0.26893700  |
| H  | -2.57033000 | -1.97926000 | -0.49334400 | H | -1.61496600 | -0.82188500 | -1.25000600 |
| O  | -3.03025800 | 2.29574000  | 0.33119600  | O | -3.83194100 | 1.99053300  | 0.27255800  |
| C  | 2.26498400  | 4.70693700  | -0.33780300 | C | 2.31331600  | 4.86447000  | -0.32998100 |
| C  | 3.59775400  | 4.32728700  | -0.40414900 | C | 3.63559200  | 4.43435600  | -0.36188300 |
| C  | 4.56293800  | 5.31766000  | -0.59910900 | C | 4.66078500  | 5.36558300  | -0.55364800 |
| C  | 4.18256400  | 6.64808000  | -0.72461000 | C | 4.34579400  | 6.71088300  | -0.71093100 |
| C  | 2.83475300  | 7.02080400  | -0.66073100 | C | 3.02146400  | 7.14062500  | -0.68127100 |
| C  | 1.86473800  | 6.03039500  | -0.46211100 | C | 1.99871300  | 6.21271800  | -0.48407000 |
| H  | 3.90174900  | 3.29401400  | -0.30826100 | H | 3.90669300  | 3.39255400  | -0.24626600 |
| H  | 4.95096600  | 7.39793300  | -0.87398600 | H | 5.16717000  | 7.40502400  | -0.86113800 |
| H  | 0.81606700  | 6.29802200  | -0.40599500 | H | 0.96541100  | 6.54277500  | -0.45148500 |
| N  | 2.46374000  | 8.36331700  | -0.72921300 | N | 2.71012300  | 8.52207300  | -0.80779000 |
| H  | 3.12206000  | 8.95843600  | -1.21241800 | H | 3.42632800  | 9.01447500  | -1.32522100 |
| H  | 1.51710600  | 8.53006400  | -1.04109800 | H | 1.81161900  | 8.66955400  | -1.24848900 |
| C  | 6.05016200  | 4.93476300  | -0.67273700 | C | 6.15169200  | 4.91863800  | -0.60538200 |
| O  | 6.31562600  | 3.71468000  | -0.59544500 | O | 6.35208500  | 3.70102400  | -0.44674600 |
| O  | 6.86166300  | 5.87812700  | -0.80175200 | O | 6.97286100  | 5.83950800  | -0.80243100 |
| Br | 0.92669800  | 3.37241000  | -0.06374400 | I | 0.68921700  | 3.49067800  | -0.05564700 |

**Anion-Anion-I Vacuum**

|   |             |             |             |
|---|-------------|-------------|-------------|
| N | -1.88940300 | -1.05760000 | -0.29993300 |
| H | -1.13264700 | -0.65062600 | 0.24932700  |
| C | -3.06612300 | -0.23966900 | 0.02090300  |
| C | -2.80635500 | 1.28854100  | 0.19711800  |
| H | -3.83262600 | -0.37257400 | -0.74714900 |

**Anion-Anion-I TCM**

|   |             |             |             |
|---|-------------|-------------|-------------|
| N | -2.36018400 | -1.27810200 | -0.08950400 |
| H | -1.55103200 | -1.14538600 | 0.51247500  |
| C | -3.16362600 | -0.05938300 | 0.01279500  |
| C | -2.38623500 | 1.28054500  | 0.04249200  |
| H | -3.87869300 | -0.02269800 | -0.81197000 |

|   |             |             |             |   |             |             |             |
|---|-------------|-------------|-------------|---|-------------|-------------|-------------|
| H | -3.75783300 | -0.09602500 | 0.93193500  | H | -4.03462800 | 0.05156300  | 0.54588800  |
| O | -1.14110500 | 1.20792100  | 0.17328100  | O | -1.12430800 | 1.20655100  | 0.11338900  |
| H | -1.96302500 | -1.31811600 | -1.02357300 | H | -2.51176400 | -2.00455700 | -0.23637800 |
| O | -3.08781900 | 2.31206800  | -0.03797800 | O | -3.06033600 | 2.31602800  | -0.13084900 |
| C | 2.38886600  | 4.80642300  | -0.35666100 | C | 2.39588700  | 4.82904800  | -0.38251300 |
| C | 3.73008200  | 4.44592600  | -0.40848000 | C | 3.73243200  | 4.46024900  | -0.47207900 |
| C | 4.69545500  | 5.43998900  | -0.58709500 | C | 4.70093800  | 5.45470600  | -0.63006500 |
| C | 4.30825800  | 6.76859500  | -0.71403300 | C | 4.32204200  | 6.79005000  | -0.69688400 |
| C | 2.95982100  | 7.12911200  | -0.66727800 | C | 2.97666200  | 7.15887200  | -0.60997300 |
| C | 1.99445900  | 6.13405100  | -0.48203900 | C | 2.00728400  | 6.16195100  | -0.44825600 |
| H | 4.04960100  | 3.41621300  | -0.31661800 | H | 4.04490900  | 3.42557900  | -0.42390000 |
| H | 5.08008600  | 7.51752600  | -0.85364700 | H | 5.09356500  | 7.54188600  | -0.81956500 |
| H | 0.94524100  | 6.40514300  | -0.43915700 | H | 0.96139100  | 6.43851600  | -0.37564700 |
| N | 2.57782400  | 8.47772200  | -0.74750200 | N | 2.60464800  | 8.50814300  | -0.62242500 |
| H | 3.24089500  | 9.05692200  | -1.24392100 | H | 3.26107300  | 9.11267600  | -1.09684100 |
| H | 1.64214000  | 8.62058200  | -1.10221000 | H | 1.66014600  | 8.67947700  | -0.93888300 |
| C | 6.19247600  | 5.07595400  | -0.64987600 | C | 6.18993400  | 5.07857600  | -0.73407400 |
| O | 6.47203500  | 3.86180600  | -0.56059500 | O | 6.46024400  | 3.85856300  | -0.69379100 |
| O | 6.98453900  | 6.03515100  | -0.78444800 | O | 6.99394200  | 6.03058400  | -0.84916000 |
| I | 0.87695500  | 3.31580600  | -0.09743200 | I | 0.88612300  | 3.33425100  | -0.14713000 |

**Anion-Anion-I DCE**

|   |             |             |             |
|---|-------------|-------------|-------------|
| N | -2.33569600 | -1.19543000 | 0.34694700  |
| H | -1.36268100 | -0.92912100 | 0.21810700  |
| C | -3.14574200 | -0.05394400 | -0.08169500 |
| C | -2.36984100 | 1.28032900  | -0.01799900 |
| H | -3.49704400 | -0.14680300 | -1.11726100 |

**Anion-Anion-I Acetone**

|   |             |             |             |
|---|-------------|-------------|-------------|
| N | -2.33339700 | -1.19169800 | 0.36998500  |
| H | -1.36453700 | -0.97465500 | 0.15235100  |
| C | -3.13989500 | -0.05770200 | -0.08215000 |
| C | -2.36351700 | 1.27404100  | -0.02434300 |
| H | -3.47945200 | -0.16010000 | -1.12163500 |

|   |             |             |             |   |             |             |             |
|---|-------------|-------------|-------------|---|-------------|-------------|-------------|
| H | -4.03540600 | 0.05031600  | 0.53467600  | H | -4.03477300 | 0.03993600  | 0.52846800  |
| O | -1.11537300 | 1.20103500  | 0.08250500  | O | -1.11586900 | 1.20578100  | 0.07777100  |
| H | -2.58117900 | -2.03477500 | -0.13459600 | H | -2.59946900 | -2.04470300 | -0.09797800 |
| O | -3.05319700 | 2.31277900  | -0.12264300 | O | -3.05893700 | 2.31005000  | -0.10784800 |
| C | 2.39397600  | 4.83867200  | -0.39640300 | C | 2.39065200  | 4.84497400  | -0.40353400 |
| C | 3.72953900  | 4.46606000  | -0.48233600 | C | 3.72524000  | 4.46862600  | -0.48655100 |
| C | 4.70088800  | 5.45904700  | -0.63202000 | C | 4.69930100  | 5.45948800  | -0.63255000 |
| C | 4.32607300  | 6.79577800  | -0.69335300 | C | 4.32829500  | 6.79733000  | -0.69276800 |
| C | 2.98087800  | 7.16827400  | -0.60896300 | C | 2.98357900  | 7.17351900  | -0.61074400 |
| C | 2.00813300  | 6.17228300  | -0.45684500 | C | 2.00780600  | 6.17932700  | -0.46293600 |
| H | 4.03840800  | 3.43026500  | -0.43727800 | H | 4.03093600  | 3.43192400  | -0.44181800 |
| H | 5.09824800  | 7.54782500  | -0.80965100 | H | 5.10180800  | 7.54838500  | -0.80615500 |
| H | 0.96274700  | 6.45140800  | -0.38755700 | H | 0.96300100  | 6.46110600  | -0.39614700 |
| N | 2.61331600  | 8.51678300  | -0.61288800 | N | 2.62009600  | 8.52189000  | -0.61194400 |
| H | 3.27180500  | 9.12620400  | -1.07812000 | H | 3.28055000  | 9.13275100  | -1.07245300 |
| H | 1.66848100  | 8.69593800  | -0.92392000 | H | 1.67519400  | 8.70621800  | -0.91965400 |
| C | 6.18741400  | 5.07711800  | -0.73107200 | C | 6.18409300  | 5.07243900  | -0.72737600 |
| O | 6.45305300  | 3.85527200  | -0.69717300 | O | 6.44568600  | 3.84937300  | -0.69438400 |
| O | 6.99815600  | 6.02460300  | -0.83627800 | O | 6.99967900  | 6.01619800  | -0.82843600 |
| I | 0.88401700  | 3.34297400  | -0.17133200 | I | 0.87891600  | 3.35091200  | -0.18151900 |

**Anion-Anion-I DMSO**

|   |             |             |             |
|---|-------------|-------------|-------------|
| N | -2.32594500 | -1.19089100 | 0.37446400  |
| H | -1.36187000 | -0.99308700 | 0.12159400  |
| C | -3.13522700 | -0.06150000 | -0.08318500 |
| C | -2.36523200 | 1.27252800  | -0.02032800 |
| H | -3.46833000 | -0.16483000 | -1.12502800 |

**Anion-Anion-I Water**

|   |             |             |             |
|---|-------------|-------------|-------------|
| N | -2.32145600 | -1.19181500 | 0.37318600  |
| H | -1.35991000 | -0.99896800 | 0.10756400  |
| C | -3.13358000 | -0.06377300 | -0.08259600 |
| C | -2.36710500 | 1.27172400  | -0.01648400 |
| H | -3.46596100 | -0.16555100 | -1.12494700 |

|                                 |             |             |             |                              |             |             |             |
|---------------------------------|-------------|-------------|-------------|------------------------------|-------------|-------------|-------------|
| H                               | -4.03363900 | 0.03304500  | 0.52890200  | H                            | -3.72290500 | 0.08796300  | 0.82317700  |
| O                               | -1.11709700 | 1.20823800  | 0.07571400  | O                            | -1.21016800 | 1.44080700  | -0.57164100 |
| H                               | -2.60302600 | -2.04794400 | -0.09039500 | H                            | -2.33489600 | -1.94038700 | 0.32261300  |
| O                               | -3.06351800 | 2.30819700  | -0.09651300 | O                            | -3.19150500 | 2.37001900  | -0.29922100 |
| C                               | 2.38884400  | 4.84802300  | -0.40635100 | C                            | 2.02457500  | 4.59962800  | -0.62522300 |
| C                               | 3.72293200  | 4.46970100  | -0.48778000 | C                            | 3.36660800  | 4.22298200  | -0.66771800 |
| C                               | 4.69843100  | 5.45936400  | -0.63230100 | C                            | 4.36111400  | 5.19110700  | -0.67677300 |
| C                               | 4.32939300  | 6.79774500  | -0.69263800 | C                            | 4.04353200  | 6.54930800  | -0.64361200 |
| C                               | 2.98499400  | 7.17589000  | -0.61207800 | C                            | 2.70493700  | 6.87895600  | -0.60173200 |
| C                               | 2.00767400  | 6.18278500  | -0.46582100 | C                            | 1.67951500  | 5.94803800  | -0.59144000 |
| H                               | 4.02702900  | 3.43255600  | -0.44287400 | H                            | 3.64458200  | 3.17550300  | -0.69517200 |
| H                               | 5.10383400  | 7.54800400  | -0.80486200 | H                            | 4.83343500  | 7.29220300  | -0.65171500 |
| H                               | 0.96319200  | 6.46600000  | -0.40024000 | H                            | 0.63428500  | 6.23731600  | -0.55891000 |
| N                               | 2.62349200  | 8.52427800  | -0.61296800 | Cl                           | 0.78495900  | 3.41334900  | -0.61791100 |
| H                               | 3.28534700  | 9.13549500  | -1.07090400 | N                            | 2.33111700  | 8.31974300  | -0.55454000 |
| H                               | 1.67882500  | 8.71094000  | -0.91984900 | H                            | 1.92095500  | 8.57302800  | 0.35149900  |
| C                               | 6.18253700  | 5.06993900  | -0.72492400 | H                            | 3.15495200  | 8.91227800  | -0.69861200 |
| O                               | 6.44225700  | 3.84637300  | -0.69144500 | C                            | 5.78826500  | 4.72925500  | -0.72659900 |
| O                               | 7.00011100  | 6.01209200  | -0.82483200 | O                            | 6.10913800  | 3.58008100  | -0.76019400 |
| I                               | 0.87558100  | 3.35540700  | -0.18560300 | O                            | 6.64536000  | 5.75972000  | -0.72893800 |
| <b>Cation-Neutral-Cl Vacuum</b> |             |             |             | H                            | 7.54633000  | 5.40669400  | -0.76248900 |
| N                               | -1.98938300 | -0.99097600 | 0.37549700  | H                            | 1.65046300  | 8.55367300  | -1.28549400 |
| H                               | -1.18245000 | -0.89952700 | -0.23171200 | H                            | -4.07961400 | 2.11865400  | -0.02341900 |
| C                               | -3.00732600 | -0.03454700 | 0.00313700  | <b>Cation-Neutral-Cl TCM</b> |             |             |             |
| C                               | -2.36722200 | 1.30520700  | -0.29892100 | N                            | -2.26064600 | -1.16950200 | 0.29090900  |
| H                               | -3.58912800 | -0.29254600 | -0.89716900 | H                            | -1.41441200 | -1.17638500 | -0.26928300 |



|    |             |             |             |
|----|-------------|-------------|-------------|
| C  | -3.08893900 | -0.04003400 | -0.08613100 |
| C  | -2.25078600 | 1.21825400  | -0.15883000 |
| H  | -3.57664500 | -0.13078800 | -1.06888200 |
| H  | -3.88150600 | 0.10253000  | 0.65398700  |
| O  | -1.05332500 | 1.22203200  | -0.21389500 |
| H  | -2.75227100 | -2.03848900 | 0.11930900  |
| O  | -2.92839700 | 2.37859900  | -0.21349500 |
| C  | 2.09106700  | 4.60337700  | -0.48672300 |
| C  | 3.43164700  | 4.24916200  | -0.54571400 |
| C  | 4.40103000  | 5.24312800  | -0.64044300 |
| C  | 4.04746400  | 6.58888300  | -0.67525900 |
| C  | 2.70138700  | 6.89831300  | -0.61088800 |
| C  | 1.70771700  | 5.94081800  | -0.51836700 |
| H  | 3.73180200  | 3.20886200  | -0.52206300 |
| H  | 4.80498000  | 7.35927000  | -0.75419700 |
| H  | 0.65889600  | 6.21013200  | -0.47408400 |
| Cl | 0.87621200  | 3.37853500  | -0.37741600 |
| N  | 2.30585800  | 8.32220500  | -0.63297100 |
| H  | 2.59066100  | 8.80603500  | 0.22600900  |
| H  | 2.72903200  | 8.81943500  | -1.42385600 |
| C  | 5.83362000  | 4.81504100  | -0.70864200 |
| O  | 6.18863900  | 3.66940600  | -0.66907000 |
| O  | 6.66912400  | 5.85172500  | -0.81997800 |
| H  | 7.57605600  | 5.51492500  | -0.86353700 |
| H  | 1.29026400  | 8.42667500  | -0.71779800 |
| H  | -3.87900300 | 2.23538500  | -0.13192400 |

**Cation-Neutral-Cl DCE**

|    |             |             |             |
|----|-------------|-------------|-------------|
| N  | -2.32698500 | -1.22197900 | 0.24367400  |
| H  | -1.51570600 | -1.29242600 | -0.36196200 |
| C  | -3.09182900 | -0.03588000 | -0.09335800 |
| C  | -2.19729900 | 1.18423900  | -0.10198200 |
| H  | -3.57793100 | -0.06353400 | -1.08026800 |
| H  | -3.88160800 | 0.11605400  | 0.64775000  |
| O  | -0.99879900 | 1.14221900  | -0.07706800 |
| H  | -2.89140000 | -2.04996800 | 0.09164000  |
| O  | -2.82299300 | 2.37113700  | -0.18613800 |
| C  | 2.09784900  | 4.61266000  | -0.45383700 |
| C  | 3.43741800  | 4.25926200  | -0.51892200 |
| C  | 4.40286400  | 5.25525700  | -0.63411700 |
| C  | 4.04420700  | 6.59883100  | -0.68399200 |
| C  | 2.69787700  | 6.90787200  | -0.61479700 |
| C  | 1.70870800  | 5.94753100  | -0.50138700 |
| H  | 3.73976200  | 3.22013200  | -0.48357600 |
| H  | 4.79844500  | 7.37034600  | -0.77729100 |
| H  | 0.65985500  | 6.21474000  | -0.45209400 |
| Cl | 0.88810400  | 3.38198000  | -0.31510300 |
| N  | 2.29945100  | 8.32806000  | -0.66007600 |
| H  | 2.62781600  | 8.83895800  | 0.16669400  |
| H  | 2.67841200  | 8.80090000  | -1.48753500 |
| C  | 5.83571400  | 4.83214300  | -0.70775900 |
| O  | 6.19599500  | 3.68675800  | -0.66174900 |
| O  | 6.66755700  | 5.86872300  | -0.83180700 |
| H  | 7.57567100  | 5.53537100  | -0.87836800 |

H 1.28098900 8.43180100 -0.69439900

H -3.78262100 2.26634500 -0.18540800

**Cation-Neutral-Cl Acetone**

N -2.34389300 -1.24081400 0.23439100

H -1.55110500 -1.32950100 -0.39305900

C -3.09792700 -0.04430500 -0.09244300

C -2.19275700 1.16766700 -0.09475400

H -3.58799400 -0.06155400 -1.07734400

H -3.88364900 0.11031400 0.65220600

O -0.99422600 1.11602400 -0.06101200

H -2.92668500 -2.05905300 0.09861800

O -2.80657300 2.35978600 -0.18151400

C 2.10106700 4.62218900 -0.44844000

C 3.43950300 4.26630100 -0.51411100

C 4.40555400 5.26144600 -0.63257900

C 4.04744000 6.60490500 -0.68531200

C 2.70161600 6.91655800 -0.61566000

C 1.71206600 5.95680200 -0.49872500

H 3.74032400 3.22688600 -0.47684700

H 4.80174500 7.37573600 -0.78101600

H 0.66367500 6.22522200 -0.44879500

Cl 0.89020800 3.39089800 -0.30615300

N 2.30573800 8.33611300 -0.66565800

H 2.64156400 8.85110400 0.15548300

H 2.67936700 8.80392300 -1.49840900

C 5.83779400 4.83795900 -0.70678400

O 6.19817200 3.69183000 -0.65962100

O 6.67012600 5.87311400 -0.83255900

H 7.57832200 5.53993000 -0.87938300

H 1.28746700 8.44293400 -0.69270000

H -3.76741500 2.26511700 -0.19105400

**Cation-Neutral-Cl DMSO**

N -2.35139900 -1.25566900 0.21940300

H -1.57372500 -1.35035600 -0.42594000

C -3.10253300 -0.05255100 -0.09077400

C -2.19295300 1.15600700 -0.08712300

H -3.59969400 -0.05882000 -1.07204500

H -3.88249500 0.09807200 0.66059900

O -0.99421600 1.10015300 -0.05412100

H -2.94433400 -2.06820500 0.09276700

O -2.80171600 2.35076800 -0.16617200

C 2.10253300 4.63058400 -0.44535300

C 3.44007200 4.27208200 -0.50947700

C 4.40737600 5.26580400 -0.63034800

C 4.05069200 6.60938200 -0.68712500

C 2.70535000 6.92371500 -0.61893300

C 1.71470000 5.96528300 -0.49955000

H 3.73917400 3.23233900 -0.46921000

H 4.80577200 7.37904000 -0.78456800

H 0.66673100 6.23528100 -0.45070900

Cl 0.88987900 3.40017700 -0.30030700

N 2.31224000 8.34317500 -0.67380900

|   |             |            |             |
|---|-------------|------------|-------------|
| H | 2.65255800  | 8.86127200 | 0.14348800  |
| H | 2.68370500  | 8.80649700 | -1.51003500 |
| C | 5.83902900  | 4.84085600 | -0.70252500 |
| O | 6.19839100  | 3.69402200 | -0.65297800 |
| O | 6.67262500  | 5.87432900 | -0.82924800 |
| H | 7.58067400  | 5.54050900 | -0.87472200 |
| H | 1.29422300  | 8.45272700 | -0.69724500 |
| H | -3.76313300 | 2.26105800 | -0.17717400 |

**Cation-Neutral-Cl Water**

|   |             |             |             |
|---|-------------|-------------|-------------|
| N | -2.35018300 | -1.25854300 | 0.21027800  |
| H | -1.57831300 | -1.35158000 | -0.44230600 |
| C | -3.10254300 | -0.05336500 | -0.08951000 |
| C | -2.19281700 | 1.15501800  | -0.08364600 |
| H | -3.60460800 | -0.05440500 | -1.06819600 |
| H | -3.87878900 | 0.09345000  | 0.66640900  |
| O | -0.99381600 | 1.09878000  | -0.05402700 |
| H | -2.94527400 | -2.06965600 | 0.08429100  |
| O | -2.80113900 | 2.35022800  | -0.15579100 |
| C | 2.10258900  | 4.63159100  | -0.44464000 |
| C | 3.43996400  | 4.27260600  | -0.50737200 |
| C | 4.40739800  | 5.26609600  | -0.62910600 |
| C | 4.05071900  | 6.60952800  | -0.68819600 |
| C | 2.70542700  | 6.92444100  | -0.62123000 |
| C | 1.71467500  | 5.96613800  | -0.50105500 |
| H | 3.73878300  | 3.23287400  | -0.46530000 |
| H | 4.80586600  | 7.37895200  | -0.78609800 |

|    |             |            |             |
|----|-------------|------------|-------------|
| H  | 0.66675300  | 6.23635600 | -0.45309200 |
| Cl | 0.88989000  | 3.40081800 | -0.29845100 |
| N  | 2.31297200  | 8.34370400 | -0.67833800 |
| H  | 2.65401500  | 8.86306800 | 0.13784700  |
| H  | 2.68440200  | 8.80543400 | -1.51545800 |
| C  | 5.83903500  | 4.84122800 | -0.69938200 |
| O  | 6.19858000  | 3.69432300 | -0.64785600 |
| O  | 6.67270000  | 5.87437500 | -0.82660600 |
| H  | 7.58089300  | 5.54074600 | -0.87069900 |
| H  | 1.29505600  | 8.45404500 | -0.70148600 |
| H  | -3.76270800 | 2.26128100 | -0.16421700 |

**Cation-Neutral-Br Vacuum**

|   |             |             |             |
|---|-------------|-------------|-------------|
| N | -2.29828900 | -1.02110200 | 0.61311000  |
| H | -1.32223100 | -1.01339500 | 0.33818900  |
| C | -3.04644600 | -0.05246200 | -0.15499400 |
| C | -2.25513300 | 1.23292600  | -0.27571800 |
| H | -3.28075200 | -0.34978300 | -1.19089000 |
| H | -3.99924200 | 0.16166900  | 0.34096100  |
| O | -1.07193600 | 1.30179800  | -0.10351700 |
| H | -2.66689000 | -1.95548300 | 0.49196700  |
| O | -2.94565400 | 2.32474200  | -0.65174600 |
| C | 2.15074700  | 4.71677800  | -0.45504600 |
| C | 3.48878600  | 4.35632300  | -0.61773700 |
| C | 4.46805500  | 5.33432500  | -0.73209400 |
| C | 4.13883200  | 6.68907200  | -0.68556300 |
| C | 2.80597600  | 7.00457900  | -0.52344400 |

|    |             |            |             |
|----|-------------|------------|-------------|
| C  | 1.79667400  | 6.06247700 | -0.40622200 |
| H  | 3.78096900  | 3.31305500 | -0.65673200 |
| H  | 4.91507200  | 7.44081900 | -0.77695100 |
| H  | 0.75765200  | 6.34744100 | -0.27815000 |
| N  | 2.42080900  | 8.44211900 | -0.46065400 |
| H  | 2.03693000  | 8.68860600 | 0.45854000  |
| H  | 3.23465700  | 9.04221700 | -0.62776900 |
| C  | 5.88961600  | 4.88736900 | -0.90881900 |
| O  | 6.22030600  | 3.74152100 | -0.95948800 |
| O  | 6.73099800  | 5.92691000 | -1.00247900 |
| H  | 7.62908100  | 5.58315200 | -1.11562600 |
| H  | 1.71570000  | 8.67231600 | -1.16928400 |
| H  | -3.88711200 | 2.13235900 | -0.72169000 |
| Br | 0.82302700  | 3.40067700 | -0.29492800 |

**Cation-Neutral-Br TCM**

|   |             |             |             |
|---|-------------|-------------|-------------|
| N | -2.30180900 | -1.20366000 | 0.25312000  |
| H | -1.43641200 | -1.20353800 | -0.27675700 |
| C | -3.09878400 | -0.04660100 | -0.10555700 |
| C | -2.24152500 | 1.19996600  | -0.10393800 |
| H | -3.55947000 | -0.09179300 | -1.10430800 |
| H | -3.91005200 | 0.08439100  | 0.61651200  |
| O | -1.04202900 | 1.18773200  | -0.08974000 |
| H | -2.80110000 | -2.05657800 | 0.03046500  |
| O | -2.89839000 | 2.37006100  | -0.17052400 |
| C | 2.19474300  | 4.72210400  | -0.45688400 |
| C | 3.53556600  | 4.36923900  | -0.53033300 |

|    |             |            |             |
|----|-------------|------------|-------------|
| C  | 4.50385100  | 5.36208900 | -0.65452400 |
| C  | 4.14969800  | 6.70699200 | -0.70452400 |
| C  | 2.80419300  | 7.01666700 | -0.62795700 |
| C  | 1.81245700  | 6.05971300 | -0.50680600 |
| H  | 3.84254900  | 3.33134400 | -0.49352500 |
| H  | 4.90664000  | 7.47580200 | -0.80356900 |
| H  | 0.76572800  | 6.33527400 | -0.45232100 |
| N  | 2.40608500  | 8.43964100 | -0.66901600 |
| H  | 2.73305000  | 8.94691500 | 0.16060100  |
| H  | 2.78596200  | 8.91511600 | -1.49450400 |
| C  | 5.93558500  | 4.93326500 | -0.73463000 |
| O  | 6.29142400  | 3.78808200 | -0.68874000 |
| O  | 6.77001900  | 5.96890300 | -0.86386200 |
| H  | 7.67641800  | 5.63148500 | -0.91337600 |
| H  | 1.38725000  | 8.54102100 | -0.70411200 |
| H  | -3.85443200 | 2.23990200 | -0.15481500 |
| Br | 0.87298300  | 3.38749200 | -0.28315300 |

**Cation-Neutral-Br DCE**

|   |             |             |             |
|---|-------------|-------------|-------------|
| N | -2.31850100 | -1.23032600 | 0.22096100  |
| H | -1.50382800 | -1.28284300 | -0.38200300 |
| C | -3.09671200 | -0.04949700 | -0.10344200 |
| C | -2.22021700 | 1.18302100  | -0.08223100 |
| H | -3.57260600 | -0.06625700 | -1.09553800 |
| H | -3.89553700 | 0.07891800  | 0.63229700  |
| O | -1.02057300 | 1.15583100  | -0.04605400 |
| H | -2.87221000 | -2.06293200 | 0.05504600  |

|    |             |            |             |   |             |             |             |
|----|-------------|------------|-------------|---|-------------|-------------|-------------|
| O  | -2.85867100 | 2.36239200 | -0.15270700 | H | -3.89283400 | 0.07364400  | 0.63390400  |
| C  | 2.19811700  | 4.73230600 | -0.44453900 | O | -1.01318200 | 1.14141700  | -0.02315900 |
| C  | 3.53739300  | 4.37674200 | -0.51759800 | H | -2.89544900 | -2.06685500 | 0.05563100  |
| C  | 4.50515300  | 5.36933500 | -0.64959600 | O | -2.84324100 | 2.35755900  | -0.14281300 |
| C  | 4.14975300  | 6.71330500 | -0.70798800 | C | 2.19785100  | 4.73889200  | -0.43684100 |
| C  | 2.80468100  | 7.02593800 | -0.63167900 | C | 3.53578700  | 4.38031100  | -0.51163900 |
| C  | 1.81389600  | 6.06864000 | -0.50257000 | C | 4.50432700  | 5.37157900  | -0.64863300 |
| H  | 3.84309300  | 3.33890500 | -0.47460700 | C | 4.14985600  | 6.71548100  | -0.71045900 |
| H  | 4.90525900  | 7.48220900 | -0.81268600 | C | 2.80551500  | 7.03129600  | -0.63230900 |
| H  | 0.76764700  | 6.34499200 | -0.44798100 | C | 1.81414700  | 6.07510600  | -0.49792400 |
| N  | 2.40888300  | 8.44668100 | -0.68438700 | H | 3.83965300  | 3.34212400  | -0.46632200 |
| H  | 2.75052500  | 8.96432600 | 0.13264800  | H | 4.90556600  | 7.48333600  | -0.81886500 |
| H  | 2.77608700  | 8.91120300 | -1.52176600 | H | 0.76852200  | 6.35301100  | -0.44173300 |
| C  | 5.93639100  | 4.94194500 | -0.72897900 | N | 2.41286400  | 8.45155900  | -0.68959900 |
| O  | 6.29435900  | 3.79602100 | -0.67798300 | H | 2.76145000  | 8.97259500  | 0.12228200  |
| O  | 6.77035700  | 5.97569400 | -0.86362100 | H | 2.77580800  | 8.91125100  | -1.53150900 |
| H  | 7.67734300  | 5.63959800 | -0.91242400 | C | 5.93473600  | 4.94325200  | -0.72964600 |
| H  | 1.39021400  | 8.55216100 | -0.70388000 | O | 6.29239800  | 3.79646900  | -0.67708300 |
| H  | -3.81719700 | 2.24778700 | -0.16254400 | O | 6.76939900  | 5.97512700  | -0.86753900 |
| Br | 0.87709800  | 3.39493300 | -0.26092200 | H | 7.67631700  | 5.63888500  | -0.91720400 |

**Cation-Neutral-Br Acetone**

|   |             |             |             |
|---|-------------|-------------|-------------|
| N | -2.32551300 | -1.24234400 | 0.20740400  |
| H | -1.52834900 | -1.30942000 | -0.41721500 |
| C | -3.09614200 | -0.05261800 | -0.10432800 |
| C | -2.21285200 | 1.17457100  | -0.07126500 |
| H | -3.57430000 | -0.05751700 | -1.09520700 |

|    |             |            |             |
|----|-------------|------------|-------------|
| H  | -3.80259800 | 2.25006200 | -0.16460100 |
| Br | 0.87589700  | 3.40159200 | -0.24735100 |

**Cation-Neutral-Br DMSO**

|   |             |             |             |
|---|-------------|-------------|-------------|
| N | -2.44509000 | -1.24461200 | 0.24599400  |
| H | -1.58264700 | -1.38399900 | -0.27071200 |

|    |             |             |             |
|----|-------------|-------------|-------------|
| C  | -3.07116100 | -0.00297200 | -0.17032500 |
| C  | -2.11552800 | 1.15668900  | -0.00049400 |
| H  | -3.39723700 | 0.02003200  | -1.22066300 |
| H  | -3.95703300 | 0.18804700  | 0.44191400  |
| O  | -0.94466500 | 1.04004700  | 0.24226400  |
| H  | -3.05479900 | -2.02347800 | 0.02353000  |
| O  | -2.63821600 | 2.38006600  | -0.17753800 |
| C  | 2.19707200  | 4.71788900  | -0.36192000 |
| C  | 3.53475200  | 4.36965100  | -0.47485300 |
| C  | 4.48844900  | 5.36790900  | -0.65739900 |
| C  | 4.11881200  | 6.70710300  | -0.72697300 |
| C  | 2.77471500  | 7.01290300  | -0.61055200 |
| C  | 1.79768500  | 6.04918700  | -0.42978200 |
| H  | 3.84961400  | 3.33506300  | -0.42457000 |
| H  | 4.86423700  | 7.47922400  | -0.86911500 |
| H  | 0.75175800  | 6.31749300  | -0.34320000 |
| N  | 2.36738300  | 8.42791500  | -0.67997900 |
| H  | 2.77451300  | 8.97516600  | 0.08594900  |
| H  | 2.66069200  | 8.86359200  | -1.56105800 |
| C  | 5.91966900  | 4.95296800  | -0.77971700 |
| O  | 6.29104600  | 3.81030700  | -0.72290100 |
| O  | 6.73835700  | 5.99059600  | -0.95998400 |
| H  | 7.64708000  | 5.66379800  | -1.03385000 |
| H  | 1.35035100  | 8.53192700  | -0.61755100 |
| H  | -3.58566800 | 2.33974100  | -0.35974200 |
| Br | 0.89606000  | 3.36877600  | -0.11354900 |

**Cation-Neutral-Br Water**

|   |             |             |             |
|---|-------------|-------------|-------------|
| N | -2.44511100 | -1.24832700 | 0.23399800  |
| H | -1.58931300 | -1.38951200 | -0.29319900 |
| C | -3.07166600 | -0.00352800 | -0.17226900 |
| C | -2.11454700 | 1.15449500  | 0.00033100  |
| H | -3.40281300 | 0.02561600  | -1.22078900 |
| H | -3.95438900 | 0.18479200  | 0.44527600  |
| O | -0.94382800 | 1.03625400  | 0.24348500  |
| H | -3.06008700 | -2.02430800 | 0.01585800  |
| O | -2.63590900 | 2.37877300  | -0.17362900 |
| C | 2.19698100  | 4.71957000  | -0.35988900 |
| C | 3.53460900  | 4.37065200  | -0.47033500 |
| C | 4.48875500  | 5.36844600  | -0.65318100 |
| C | 4.11939000  | 6.70752300  | -0.72564300 |
| C | 2.77522700  | 7.01405300  | -0.61146400 |
| C | 1.79778900  | 6.05076500  | -0.43039700 |
| H | 3.84906900  | 3.33606600  | -0.41792500 |
| H | 4.86502600  | 7.47933000  | -0.86807000 |
| H | 0.75182900  | 6.31947500  | -0.34564500 |
| N | 2.36855700  | 8.42888300  | -0.68394800 |
| H | 2.77750500  | 8.97806300  | 0.07962600  |
| H | 2.66048000  | 8.86195700  | -1.56675300 |
| C | 5.92006600  | 4.95320700  | -0.77243600 |
| O | 6.29132600  | 3.81047800  | -0.71318100 |
| O | 6.73920300  | 5.99029400  | -0.95287100 |
| H | 7.64805800  | 5.66338700  | -1.02472000 |
| H | 1.35174200  | 8.53385400  | -0.61990500 |

H -3.58313400 2.34004900 -0.35761200

Br 0.89538600 3.37071800 -0.11148800

**Cation-Neutral-I Vacuum**

N -2.34180600 -1.04370400 0.63123100

H -1.36614800 -1.05234100 0.35526300

C -3.08210700 -0.08097300 -0.15080300

C -2.29574400 1.20675600 -0.26386600

H -3.30038900 -0.38081700 -1.18974800

H -4.04270600 0.13079500 0.33070600

O -1.11329900 1.27755100 -0.07289900

H -2.72138200 -1.97590100 0.52789300

O -2.97703800 2.29533500 -0.65386900

C 2.29760000 4.86499600 -0.48817300

C 3.63958600 4.51703400 -0.65086100

C 4.61907300 5.49700200 -0.75815000

C 4.28662400 6.85015900 -0.70436900

C 2.95237700 7.15922200 -0.54319400

C 1.94671900 6.21155500 -0.43323300

H 3.94391500 3.47744400 -0.69619500

H 5.06045300 7.60519000 -0.78969900

H 0.90913500 6.50352800 -0.30578500

N 2.56255300 8.59579100 -0.47223500

H 2.18004800 8.83631000 0.44893900

H 3.37396800 9.19927800 -0.63839800

C 6.04156900 5.05515600 -0.93401500

O 6.37729900 3.91081000 -0.99167200

O 6.88147200 6.09746000 -1.01843000

H 7.78012600 5.75538000 -1.13119700

H 1.85499800 8.82693300 -1.17787200

H -3.91797500 2.10613500 -0.74015500

I 0.81019900 3.37598000 -0.31183000

**Cation-Neutral-I TCM**

N -2.32552500 -1.22495200 0.25207100

H -1.47923300 -1.23887500 -0.30769900

C -3.13124800 -0.07178100 -0.09789800

C -2.28140800 1.17886600 -0.10215100

H -3.60192900 -0.11705400 -1.09210500

H -3.93565800 0.05433000 0.63252500

O -1.08012900 1.16975300 -0.09321600

H -2.83586200 -2.07940200 0.06243400

O -2.93840000 2.34593800 -0.16738300

C 2.34007300 4.86885200 -0.48449800

C 3.68493800 4.52717500 -0.55435200

C 4.65298600 5.52201800 -0.67298700

C 4.29542900 6.86575400 -0.72167400

C 2.94886800 7.17002700 -0.64907500

C 1.96048600 6.20789400 -0.53329400

H 4.00346200 3.49256000 -0.51925500

H 5.05019800 7.63729600 -0.81618100

H 0.91492300 6.48971800 -0.48260000

N 2.54672500 8.59254700 -0.68815600

H 2.86359900 9.09730700 0.14686600

|   |             |            |             |
|---|-------------|------------|-------------|
| H | 2.93345100  | 9.07289600 | -1.50754700 |
| C | 6.08587100  | 5.09811000 | -0.74865400 |
| O | 6.44670000  | 3.95419400 | -0.70373500 |
| O | 6.91817500  | 6.13667500 | -0.87306600 |
| H | 7.82540700  | 5.80134300 | -0.92023000 |
| H | 1.52800800  | 8.69063600 | -0.73334700 |
| H | -3.89464600 | 2.21649900 | -0.14914200 |
| I | 0.86385800  | 3.36373400 | -0.29826200 |

**Cation-Neutral-I DCE**

|   |             |             |             |
|---|-------------|-------------|-------------|
| N | -2.34466400 | -1.24732300 | 0.22458000  |
| H | -1.53737400 | -1.30300400 | -0.38788100 |
| C | -3.13047500 | -0.07161600 | -0.09849500 |
| C | -2.26185600 | 1.16558200  | -0.08116800 |
| H | -3.60957200 | -0.09113500 | -1.08908100 |
| H | -3.92754400 | 0.05345700  | 0.63967400  |
| O | -1.06040200 | 1.14161800  | -0.04705700 |
| H | -2.89817000 | -2.08273200 | 0.07285400  |
| O | -2.90063300 | 2.34174000  | -0.15263000 |
| C | 2.34502800  | 4.87503300  | -0.46777500 |
| C | 3.68858000  | 4.53194000  | -0.53988200 |
| C | 4.65468300  | 5.52766600  | -0.66872300 |
| C | 4.29443400  | 6.87008600  | -0.72570600 |
| C | 2.94808900  | 7.17600000  | -0.65105000 |
| C | 1.96192800  | 6.21250600  | -0.52470900 |
| H | 4.00711600  | 3.49774500  | -0.49889100 |
| H | 5.04694600  | 7.64230600  | -0.82772300 |

|   |             |            |             |
|---|-------------|------------|-------------|
| H | 0.91661500  | 6.49379600 | -0.47199200 |
| N | 2.54637400  | 8.59576700 | -0.70278300 |
| H | 2.88314600  | 9.11373500 | 0.11599100  |
| H | 2.91382900  | 9.06340900 | -1.53824700 |
| C | 6.08740800  | 5.10674700 | -0.74664500 |
| O | 6.45162600  | 3.96245800 | -0.69745500 |
| O | 6.91785300  | 6.14431600 | -0.87815200 |
| H | 7.82596900  | 5.81137000 | -0.92647700 |
| H | 1.52735100  | 8.69660800 | -0.72537000 |
| H | -3.85935900 | 2.22744000 | -0.16023800 |
| I | 0.87219200  | 3.36654400 | -0.26758300 |

**Cation-Neutral-I Acetone**

|   |             |             |             |
|---|-------------|-------------|-------------|
| N | -2.35239600 | -1.25752900 | 0.21625600  |
| H | -1.56408000 | -1.33003800 | -0.41885600 |
| C | -3.12945000 | -0.07232000 | -0.09541000 |
| C | -2.25135400 | 1.15791400  | -0.07345500 |
| H | -3.61426500 | -0.08245200 | -1.08306200 |
| H | -3.92160400 | 0.05460200  | 0.64754800  |
| O | -1.04984000 | 1.12584600  | -0.03088000 |
| H | -2.92324200 | -2.08430800 | 0.08126600  |
| O | -2.88019900 | 2.33868700  | -0.14844000 |
| C | 2.34521000  | 4.87916800  | -0.46285300 |
| C | 3.68789100  | 4.53435300  | -0.53579900 |
| C | 4.65390400  | 5.52979800  | -0.66806100 |
| C | 4.29336900  | 6.87188600  | -0.72792700 |
| C | 2.94737700  | 7.17962000  | -0.65247800 |



|   |             |            |             |
|---|-------------|------------|-------------|
| C | 1.96138000  | 6.21621700 | -0.52230400 |
| H | 4.00553600  | 3.50004700 | -0.49299400 |
| H | 5.04541700  | 7.64388600 | -0.83256300 |
| H | 0.91638900  | 6.49798700 | -0.46862200 |
| N | 2.54743100  | 8.59854900 | -0.70874700 |
| H | 2.89081600  | 9.12042700 | 0.10473100  |
| H | 2.90994200  | 9.06157400 | -1.54895900 |
| C | 6.08628800  | 5.10938600 | -0.74670100 |
| O | 6.45127700  | 3.96457200 | -0.69634300 |
| O | 6.91654100  | 6.14600800 | -0.88013400 |
| H | 7.82494600  | 5.81381300 | -0.92887200 |
| H | 1.52864300  | 8.70205400 | -0.72475900 |
| H | -3.83997400 | 2.23280600 | -0.16559500 |
| I | 0.87316400  | 3.36950700 | -0.25860000 |

**Cation-Neutral-I DMSO**

|   |             |             |             |
|---|-------------|-------------|-------------|
| N | -2.34980500 | -1.26595200 | 0.19265500  |
| H | -1.57877800 | -1.33826900 | -0.46348000 |
| C | -3.12836600 | -0.07479000 | -0.09258400 |
| C | -2.24902300 | 1.15426900  | -0.05986100 |
| H | -3.62339900 | -0.06954100 | -1.07499200 |
| H | -3.91285600 | 0.04158600  | 0.66006500  |
| O | -1.04713600 | 1.12121900  | -0.02051800 |
| H | -2.92872200 | -2.08825100 | 0.06399400  |
| O | -2.87666100 | 2.33627700  | -0.11975100 |
| C | 2.34429600  | 4.88338400  | -0.46030100 |
| C | 3.68636900  | 4.53641600  | -0.53007100 |

|   |             |            |             |
|---|-------------|------------|-------------|
| C | 4.65329600  | 5.53064400 | -0.66514700 |
| C | 4.29367800  | 6.87262300 | -0.73113800 |
| C | 2.94799000  | 7.18256100 | -0.65850700 |
| C | 1.96112400  | 6.22028300 | -0.52551300 |
| H | 4.00269300  | 3.50196700 | -0.48257400 |
| H | 5.04623400  | 7.64365200 | -0.83789200 |
| H | 0.91642300  | 6.50324300 | -0.47401700 |
| N | 2.55030000  | 8.60113600 | -0.72144400 |
| H | 2.89795200  | 9.12720600 | 0.08749300  |
| H | 2.91057600  | 9.05868100 | -1.56560200 |
| C | 6.08537500  | 5.10931000 | -0.73960800 |
| O | 6.44984900  | 3.96407100 | -0.68438400 |
| O | 6.91653900  | 6.14440000 | -0.87502900 |
| H | 7.82501000  | 5.81191200 | -0.92083200 |
| H | 1.53177000  | 8.70712100 | -0.73406400 |
| H | -3.83674300 | 2.23213200 | -0.13704200 |
| I | 0.87113300  | 3.37477100 | -0.25247100 |

**Cation-Neutral-I Water**

|   |             |             |             |
|---|-------------|-------------|-------------|
| N | -2.34554300 | -1.27057400 | 0.17045400  |
| H | -1.58254600 | -1.33543600 | -0.49580400 |
| C | -3.12768900 | -0.07669000 | -0.09291400 |
| C | -2.25049900 | 1.15343700  | -0.04697800 |
| H | -3.62814000 | -0.05800700 | -1.07234600 |
| H | -3.90826900 | 0.02742200  | 0.66553300  |
| O | -1.04833800 | 1.12230100  | -0.01164400 |
| H | -2.92592200 | -2.09141800 | 0.03882000  |

|                                               |             |             |             |                               |             |             |             |
|-----------------------------------------------|-------------|-------------|-------------|-------------------------------|-------------|-------------|-------------|
| O                                             | -2.88034700 | 2.33488600  | -0.08973200 | H                             | -3.74572600 | 0.22188900  | 0.45549000  |
| C                                             | 2.34373600  | 4.88567500  | -0.45791600 | O                             | -0.78979400 | 1.12290300  | 0.41180200  |
| C                                             | 3.68557900  | 4.53753000  | -0.52461400 | H                             | -1.66394000 | -0.88927800 | -1.28212100 |
| C                                             | 4.65316100  | 5.53081300  | -0.66221500 | O                             | -2.45438500 | 2.57643900  | 0.49563500  |
| C                                             | 4.29422500  | 6.87265700  | -0.73380700 | C                             | 2.34988100  | 4.68123100  | -0.23885200 |
| C                                             | 2.94864600  | 7.18379200  | -0.66390600 | C                             | 3.69766600  | 4.36344400  | -0.30505400 |
| C                                             | 1.96115700  | 6.22244500  | -0.52860300 | C                             | 4.59893200  | 5.39457500  | -0.55860200 |
| H                                             | 4.00120600  | 3.50310600  | -0.47268800 | C                             | 4.17351300  | 6.70524000  | -0.74195200 |
| H                                             | 5.04721000  | 7.64295200  | -0.84240700 | C                             | 2.81069000  | 7.00878600  | -0.67622000 |
| H                                             | 0.91657200  | 6.50615900  | -0.47944800 | C                             | 1.89806500  | 5.98089300  | -0.41947600 |
| N                                             | 2.55212800  | 8.60218500  | -0.73239900 | H                             | 4.05058900  | 3.35061600  | -0.16645000 |
| H                                             | 2.90210800  | 9.13158900  | 0.07334900  | H                             | 4.89881800  | 7.48710600  | -0.93024800 |
| H                                             | 2.91114300  | 9.05551100  | -1.57934000 | H                             | 0.83720500  | 6.19270400  | -0.35416600 |
| C                                             | 6.08511200  | 5.10864500  | -0.73270000 | Cl                            | 1.19051300  | 3.42394500  | 0.07587200  |
| O                                             | 6.44908200  | 3.96335000  | -0.67243900 | N                             | 2.37101000  | 8.32288800  | -0.80561700 |
| O                                             | 6.91697300  | 6.14268100  | -0.87059200 | H                             | 2.99424700  | 8.94218600  | -1.30072800 |
| H                                             | 7.82542800  | 5.80975400  | -0.91354400 | H                             | 1.40971400  | 8.43660200  | -1.08847700 |
| H                                             | 1.53371300  | 8.70933900  | -0.74325400 | C                             | 6.04392300  | 5.03746200  | -0.62811400 |
| H                                             | -3.84037700 | 2.22957700  | -0.10507400 | O                             | 6.48403900  | 3.92895700  | -0.48820200 |
| I                                             | 0.86960900  | 3.37837700  | -0.24640500 | O                             | 6.83800300  | 6.10026700  | -0.87063300 |
|                                               |             |             |             | H                             | 7.74575800  | 5.77110400  | -0.89719600 |
|                                               |             |             |             | H                             | -3.39511600 | 2.60750300  | 0.29185000  |
| <b>Neutral-Neutral-Cl Vacuum ModRedundant</b> |             |             |             |                               |             |             |             |
| N                                             | -2.39534500 | -0.97547000 | -0.58448900 |                               |             |             |             |
| H                                             | -1.94718800 | -1.35471100 | 0.24274800  | A                             | 15          | 10          | 7           |
| C                                             | -2.94872400 | 0.32371000  | -0.28938800 | D                             | 15          | 10          | 7           |
| C                                             | -1.94689700 | 1.35171500  | 0.23375100  |                               |             |             |             |
| H                                             | -3.41768900 | 0.73567000  | -1.18965800 |                               |             |             |             |
|                                               |             |             |             | <b>Neutral-Neutral-Cl TCM</b> |             |             |             |

|    |             |             |             |
|----|-------------|-------------|-------------|
| N  | -2.33806500 | -1.16715000 | -0.13586000 |
| H  | -1.72867000 | -1.24424800 | 0.67167900  |
| C  | -3.02871200 | 0.10162200  | -0.11448400 |
| C  | -2.12651700 | 1.33041600  | -0.09845200 |
| H  | -3.68399100 | 0.17996200  | -0.98764000 |
| H  | -3.67766400 | 0.15416900  | 0.76540600  |
| O  | -0.92949600 | 1.28791700  | -0.09468700 |
| H  | -1.73645100 | -1.22120600 | -0.95111300 |
| O  | -2.75878500 | 2.51939400  | -0.08700800 |
| C  | 2.33729800  | 4.80911300  | -0.44403700 |
| C  | 3.66698200  | 4.42405200  | -0.50922800 |
| C  | 4.62888300  | 5.42811900  | -0.60861600 |
| C  | 4.27660400  | 6.77246600  | -0.64119700 |
| C  | 2.92859300  | 7.14349000  | -0.57352200 |
| C  | 1.95514300  | 6.14206000  | -0.47343700 |
| H  | 3.95798300  | 3.38270100  | -0.48653300 |
| H  | 5.04358900  | 7.53285500  | -0.71864500 |
| H  | 0.90521500  | 6.40480800  | -0.41829100 |
| Cl | 1.10174400  | 3.58336300  | -0.32619400 |
| N  | 2.56402900  | 8.48181300  | -0.54686000 |
| H  | 3.23221600  | 9.12450400  | -0.94660200 |
| H  | 1.61751800  | 8.68527800  | -0.83290700 |
| C  | 6.05651100  | 5.00519600  | -0.68326900 |
| O  | 6.43043700  | 3.86056000  | -0.65607700 |
| O  | 6.90612300  | 6.03829100  | -0.78710200 |
| H  | 7.80440700  | 5.68166600  | -0.82959800 |
| H  | -3.71716300 | 2.40716500  | -0.09421800 |

**Neutral-Neutral-Cl DCE**

|    |             |             |             |
|----|-------------|-------------|-------------|
| N  | -2.34091900 | -1.17218000 | -0.13459400 |
| H  | -1.73426700 | -1.24870200 | 0.67513300  |
| C  | -3.03416900 | 0.09590500  | -0.11561500 |
| C  | -2.13393200 | 1.32524800  | -0.09756400 |
| H  | -3.68666100 | 0.17374400  | -0.99059200 |
| H  | -3.68517700 | 0.14856800  | 0.76243400  |
| O  | -0.93547300 | 1.28484600  | -0.09154700 |
| H  | -1.73763600 | -1.22632600 | -0.94867000 |
| O  | -2.76413300 | 2.51383400  | -0.08716000 |
| C  | 2.34066100  | 4.81316800  | -0.44331200 |
| C  | 3.66969200  | 4.42654500  | -0.50847700 |
| C  | 4.63196900  | 5.43057600  | -0.60891500 |
| C  | 4.27990100  | 6.77485300  | -0.64212700 |
| C  | 2.93162500  | 7.14714100  | -0.57364700 |
| C  | 1.95759100  | 6.14563000  | -0.47303600 |
| H  | 3.95963400  | 3.38494500  | -0.48553600 |
| H  | 5.04637700  | 7.53550800  | -0.72160200 |
| H  | 0.90790100  | 6.40927600  | -0.41874500 |
| Cl | 1.10418600  | 3.58626700  | -0.32534700 |
| N  | 2.56805900  | 8.48444100  | -0.54627300 |
| H  | 3.23637000  | 9.12798300  | -0.94493800 |
| H  | 1.62107400  | 8.68929900  | -0.83050200 |
| C  | 6.05976700  | 5.00733000  | -0.68410900 |
| O  | 6.43168600  | 3.86119200  | -0.65570000 |
| O  | 6.90863500  | 6.03859700  | -0.78928800 |

H 7.80843900 5.68510000 -0.83328700

H -3.72343900 2.40558800 -0.09547700

**Neutral-Neutral-Cl Acetone**

N -2.34302100 -1.17464100 -0.13336500

H -1.73815300 -1.25082000 0.67776000

C -3.03705800 0.09338200 -0.11637400

C -2.13724500 1.32264100 -0.09725600

H -3.68770300 0.17086700 -0.99263200

H -3.68953000 0.14654100 0.76041600

O -0.93807900 1.28246800 -0.08917200

H -1.73855100 -1.22938600 -0.94654900

O -2.76558900 2.51138400 -0.08826800

C 2.34257500 4.81488100 -0.44266600

C 3.67130500 4.42765900 -0.50812500

C 4.63356400 5.43185400 -0.60927900

C 4.28135000 6.77601000 -0.64272400

C 2.93289900 7.14871700 -0.57351600

C 1.95875500 6.14700500 -0.47241400

H 3.96091600 3.38599700 -0.48518400

H 5.04742100 7.53693600 -0.72345100

H 0.90915900 6.41091700 -0.41826100

Cl 1.10584000 3.58713700 -0.32442600

N 2.56963300 8.48544700 -0.54566900

H 3.23790700 9.12955200 -0.94371800

H 1.62238000 8.69091500 -0.82892200

C 6.06154600 5.00872600 -0.68505400

O 6.43251800 3.86181500 -0.65688500

O 6.90988900 6.03917200 -0.79000400

H 7.81045300 5.68733900 -0.83522200

H -3.72541900 2.40586200 -0.09753300

**Neutral-Neutral-Cl DMSO**

N -2.34547900 -1.17640800 -0.13336900

H -1.74207600 -1.25281200 0.67882900

C -3.03994500 0.09155400 -0.11730300

C -2.14046200 1.32078300 -0.09568200

H -3.68878100 0.16938800 -0.99481700

H -3.69417300 0.14435200 0.75816200

O -0.94087800 1.28049600 -0.08432100

H -1.73992700 -1.23120700 -0.94574600

O -2.76752900 2.50962100 -0.08756000

C 2.34491300 4.81553800 -0.44239200

C 3.67359800 4.42844000 -0.50785700

C 4.63544200 5.43312200 -0.60940300

C 4.28260500 6.77703900 -0.64315500

C 2.93391200 7.14948700 -0.57361300

C 1.96008500 6.14728400 -0.47225400

H 3.96344300 3.38687100 -0.48474800

H 5.04815200 7.53842000 -0.72461100

H 0.91043300 6.41090700 -0.41824600

Cl 1.10847400 3.58678800 -0.32400300

N 2.57033900 8.48574100 -0.54551000

H 3.23844200 9.13050600 -0.94287700

H 1.62289300 8.69132600 -0.82819500  
C 6.06374600 5.01068400 -0.68521700  
O 6.43462600 3.86348800 -0.65623500  
O 6.91121600 6.04085300 -0.79184100  
H 7.81233600 5.69030600 -0.83765500  
H -3.72764400 2.40581100 -0.09887400

**Neutral-Neutral-Cl Water**

N -2.34561300 -1.17726300 -0.13646400  
H -1.74553400 -1.25608900 0.67796600  
C -3.04094300 0.09029100 -0.11906800  
C -2.14220900 1.31983000 -0.09099800  
H -3.68686300 0.17039800 -0.99848000  
H -3.69785100 0.14039200 0.75448100  
O -0.94249800 1.28051000 -0.07598400  
H -1.73694400 -1.22922400 -0.94670200  
O -2.76969300 2.50840100 -0.08194300  
C 2.34573400 4.81628800 -0.44069400  
C 3.67440800 4.42911900 -0.50584700  
C 4.63616700 5.43374700 -0.60919900  
C 4.28321000 6.77758600 -0.64499200  
C 2.93445000 7.15009800 -0.57561000  
C 1.96069800 6.14791700 -0.47245000  
H 3.96427600 3.38759000 -0.48127200  
H 5.04861400 7.53891600 -0.72806800  
H 0.91106700 6.41164300 -0.41863400  
Cl 1.10940800 3.58753500 -0.32007200

N 2.57075800 8.48624200 -0.54930000  
H 3.23880800 9.13051100 -0.94765800  
H 1.62329600 8.69130300 -0.83246500  
C 6.06448100 5.01126100 -0.68459500  
O 6.43537100 3.86405700 -0.65386600  
O 6.91182000 6.04137100 -0.79199100  
H 7.81316800 5.69122900 -0.83727800  
H -3.72983200 2.40471500 -0.09731200

**Neutral-Neutral-Br Vacuum ModRedundant**

N -2.46689600 -1.21359800 0.09287800  
H -1.49315800 -1.11858000 -0.17691300  
C -3.16027500 0.03678800 -0.12891700  
C -2.20268100 1.20266600 0.04121800  
H -3.58871100 0.15284700 -1.13672000  
H -3.98328100 0.15017200 0.58627500  
O -1.01424200 1.09059000 0.01329000  
H -2.88118200 -1.97108700 -0.43303200  
O -2.77446500 2.41431300 0.17867000  
C 2.30436000 4.68429400 -0.44877300  
C 3.64674100 4.33965800 -0.50113100  
C 4.57767100 5.36201000 -0.67281500  
C 4.18638800 6.69083400 -0.78978600  
C 2.83018400 7.02301000 -0.73394300  
C 1.88750700 6.00325300 -0.56478300  
H 3.97790000 3.31404100 -0.41207600  
H 4.93280700 7.46335300 -0.92780600

H 0.83067000 6.24081600 -0.52744800  
 N 2.41608000 8.34162800 -0.90312800  
 H 1.51091400 8.56597700 -0.51879800  
 H 3.10836200 9.04285500 -0.68768200  
 C 6.01581600 4.97616500 -0.72558100  
 O 6.42876900 3.85189400 -0.63934000  
 O 6.83915700 6.03313100 -0.88298700  
 H 7.73969400 5.68468800 -0.90774700  
 H -3.73279000 2.33749200 0.22882900  
 Br 1.00046500 3.32879200 -0.21544600

A 15 10 7 120.0 F

D 15 10 7 4 0.0 F

**Neutral-Neutral-Br TCM**

N -2.45223100 -1.24698900 0.03049200  
 H -1.56032900 -1.23229100 -0.45356500  
 C -3.13769400 0.01567900 -0.16970300  
 C -2.17219900 1.16798700 0.00880400  
 H -3.57966300 0.14834300 -1.16900600  
 H -3.94870400 0.12090000 0.55716200  
 O -0.97959800 1.04730300 0.00626300  
 H -2.99925800 -2.01004600 -0.34945600  
 O -2.72495400 2.38708600 0.12618200  
 C 2.28829400 4.72961200 -0.38589400  
 C 3.62453700 4.36318200 -0.43885600  
 C 4.57105600 5.37601300 -0.58923500

C 4.19829500 6.71165700 -0.68404600  
 C 2.84526100 7.06519000 -0.62896600  
 C 1.88689800 6.05464900 -0.47686800  
 H 3.93706600 3.33044700 -0.36755300  
 H 4.95373000 7.47883700 -0.79912000  
 H 0.83476700 6.31008300 -0.42881600  
 N 2.46054900 8.39787200 -0.66363600  
 H 3.11737300 9.03121800 -1.09568800  
 H 1.51009700 8.57341400 -0.95490100  
 C 6.00508700 4.97245800 -0.64590000  
 O 6.39685000 3.83595900 -0.57199900  
 O 6.83893400 6.01376700 -0.79008500  
 H 7.74253800 5.66938000 -0.81720900  
 H -3.68821400 2.33700400 0.14056400  
 Br 0.96731900 3.37928800 -0.18265400

**Neutral-Neutral-Br DCE**

N -2.43790100 -1.25275800 0.01606400  
 H -1.59236000 -1.26104300 -0.54551600  
 C -3.13047800 0.01006300 -0.16255300  
 C -2.17126300 1.16535200 0.02209000  
 H -3.58588600 0.15103700 -1.15425800  
 H -3.93319700 0.10150900 0.57468200  
 O -0.97699000 1.05042800 0.04118800  
 H -3.02269700 -2.01628500 -0.30342400  
 O -2.72829800 2.38320700 0.12323800  
 C 2.28893400 4.73782300 -0.37900200

|    |             |            |             |    |             |            |             |
|----|-------------|------------|-------------|----|-------------|------------|-------------|
| C  | 3.62394200  | 4.36774800 | -0.43363900 | O  | -2.69174900 | 2.37973200 | 0.10906200  |
| C  | 4.57207400  | 5.37869200 | -0.58916500 | C  | 2.29495500  | 4.73848000 | -0.37245200 |
| C  | 4.20137300  | 6.71461900 | -0.68685300 | C  | 3.63078000  | 4.37161800 | -0.42603300 |
| C  | 2.84872400  | 7.07157300 | -0.62934100 | C  | 4.57585000  | 5.38506000 | -0.58522200 |
| C  | 1.88853100  | 6.06277600 | -0.47264800 | C  | 4.20104500  | 6.71941900 | -0.68731600 |
| H  | 3.93401900  | 3.33446500 | -0.36039500 | C  | 2.84708100  | 7.07293200 | -0.63055200 |
| H  | 4.95727800  | 7.48054600 | -0.80691000 | C  | 1.88979200  | 6.06156900 | -0.47032400 |
| H  | 0.83710700  | 6.32074700 | -0.42423400 | H  | 3.94368100  | 3.33946700 | -0.34957400 |
| N  | 2.46683600  | 8.40381800 | -0.66572600 | H  | 4.95434300  | 7.48738200 | -0.81066700 |
| H  | 3.12357700  | 9.03567300 | -1.10059200 | H  | 0.83765400  | 6.31668200 | -0.42322800 |
| H  | 1.51562300  | 8.58114800 | -0.95426200 | N  | 2.46137300  | 8.40330200 | -0.67076800 |
| C  | 6.00554500  | 4.97237800 | -0.64831200 | H  | 3.11604400  | 9.03637300 | -1.10717700 |
| O  | 6.39364100  | 3.83395000 | -0.57110500 | H  | 1.50931600  | 8.57727300 | -0.95895800 |
| O  | 6.83995500  | 6.01006600 | -0.79818400 | C  | 6.01070700  | 4.98289900 | -0.64340100 |
| H  | 7.74447500  | 5.66737700 | -0.82806000 | O  | 6.40133000  | 3.84519400 | -0.56188900 |
| H  | -3.69223500 | 2.33399200 | 0.11339300  | O  | 6.84144300  | 6.02177600 | -0.79718500 |
| Br | 0.96547900  | 3.38910300 | -0.17016700 | H  | 7.74774700  | 5.68337300 | -0.82714900 |
|    |             |            |             | H  | -3.65627100 | 2.34773300 | 0.07870400  |
|    |             |            |             | Br | 0.97560000  | 3.38554300 | -0.15921000 |

**Neutral-Neutral-Br Acetone**

|   |             |             |             |
|---|-------------|-------------|-------------|
| N | -2.46043200 | -1.26379100 | 0.00837900  |
| H | -1.65044400 | -1.31098800 | -0.60153500 |
| C | -3.12990300 | 0.01272400  | -0.16373000 |
| C | -2.15353600 | 1.15218800  | 0.02710200  |
| H | -3.58610700 | 0.16489800  | -1.15311700 |
| H | -3.92914200 | 0.11323000  | 0.57578800  |
| O | -0.96114700 | 1.01933900  | 0.06948800  |
| H | -3.08420300 | -2.01540500 | -0.26272500 |

**Neutral-Neutral-Br DMSO**

|   |             |             |             |
|---|-------------|-------------|-------------|
| N | -2.54447300 | -1.23409100 | 0.18658200  |
| H | -1.66463200 | -1.38958400 | -0.29511800 |
| C | -3.10787000 | 0.04024300  | -0.22162000 |
| C | -2.11208300 | 1.15646800  | 0.00410800  |
| H | -3.39750000 | 0.09836800  | -1.28126400 |
| H | -4.00555300 | 0.25257200  | 0.36564100  |

|    |             |             |             |    |             |             |             |
|----|-------------|-------------|-------------|----|-------------|-------------|-------------|
| O  | -0.95296000 | 0.98536900  | 0.26735800  | H  | -3.42089300 | 0.10711300  | -1.26475400 |
| H  | -3.16957200 | -1.98446900 | -0.08536600 | H  | -3.99610300 | 0.24740700  | 0.39492900  |
| O  | -2.58285600 | 2.40447200  | -0.14748300 | O  | -0.94682500 | 0.97727200  | 0.25376700  |
| C  | 2.29695500  | 4.72091200  | -0.31662300 | H  | -3.17861900 | -1.98558200 | -0.08438600 |
| C  | 3.63055000  | 4.36000200  | -0.42991300 | O  | -2.57867200 | 2.40135200  | -0.13486600 |
| C  | 4.56472700  | 5.37980000  | -0.61192400 | C  | 2.29786600  | 4.72248000  | -0.32089400 |
| C  | 4.18130300  | 6.71396300  | -0.67777500 | C  | 3.63157400  | 4.36155300  | -0.43277600 |
| C  | 2.82952200  | 7.06120300  | -0.56045000 | C  | 4.56596800  | 5.38151300  | -0.61292800 |
| C  | 1.88295800  | 6.04345500  | -0.37766500 | C  | 4.18260200  | 6.71571100  | -0.67832800 |
| H  | 3.94979400  | 3.32799900  | -0.38260200 | C  | 2.83062600  | 7.06293200  | -0.56242100 |
| H  | 4.92609200  | 7.48704500  | -0.81933300 | C  | 1.88380800  | 6.04499100  | -0.38146300 |
| H  | 0.83276400  | 6.29337700  | -0.28424900 | H  | 3.95066000  | 3.32949000  | -0.38584200 |
| N  | 2.43782500  | 8.39009600  | -0.56360400 | H  | 4.92748700  | 7.48893100  | -0.81863300 |
| H  | 3.07186700  | 9.03272500  | -1.01627700 | H  | 0.83350500  | 6.29487600  | -0.28928300 |
| H  | 1.47415900  | 8.56441800  | -0.81044600 | N  | 2.43900800  | 8.39167400  | -0.56501900 |
| C  | 5.99750500  | 4.98454900  | -0.73648900 | H  | 3.07359000  | 9.03479200  | -1.01626100 |
| O  | 6.39463100  | 3.84694900  | -0.68766300 | H  | 1.47554600  | 8.56638400  | -0.81240900 |
| O  | 6.81688000  | 6.02848100  | -0.91058400 | C  | 5.99892700  | 4.98638200  | -0.73602700 |
| H  | 7.72309800  | 5.69593700  | -0.98282600 | O  | 6.39588200  | 3.84862400  | -0.68751800 |
| H  | -3.52774400 | 2.40743300  | -0.34612800 | O  | 6.81837200  | 6.03038300  | -0.90824700 |
| Br | 0.99041600  | 3.36031200  | -0.07197400 | H  | 7.72479800  | 5.69821000  | -0.97992100 |
|    |             |             |             | H  | -3.52564200 | 2.40739100  | -0.32355000 |
|    |             |             |             | Br | 0.99115500  | 3.36138900  | -0.07902600 |

**Neutral-Neutral-Br Water**

|   |             |             |             |
|---|-------------|-------------|-------------|
| N | -2.54172000 | -1.24019600 | 0.17365300  |
| H | -1.67772200 | -1.39776100 | -0.33528000 |
| C | -3.11045600 | 0.03895900  | -0.21169400 |
| C | -2.10891600 | 1.15173400  | 0.00548800  |

**Neutral-Neutral-I Vacuum**

|   |             |             |            |
|---|-------------|-------------|------------|
| N | -2.48415300 | -1.16816700 | 0.42325800 |
| H | -1.47719400 | -1.05919700 | 0.36006500 |



|   |             |             |             |   |             |             |             |
|---|-------------|-------------|-------------|---|-------------|-------------|-------------|
| C | -3.14059100 | -0.05075400 | -0.21950900 | N | -2.39743100 | -1.21872000 | 0.27236900  |
| C | -2.30434100 | 1.20528000  | -0.06329900 | H | -1.48540700 | -1.19733200 | -0.17225000 |
| H | -3.29333400 | -0.16645100 | -1.30446400 | C | -3.15897300 | -0.04723700 | -0.11675300 |
| H | -4.12606400 | 0.12177300  | 0.22811100  | C | -2.29499500 | 1.19145200  | -0.02724100 |
| O | -1.14208300 | 1.19257000  | 0.21704700  | H | -3.54459100 | -0.06709700 | -1.14753900 |
| H | -2.74680400 | -2.04921400 | 0.00260700  | H | -4.02004400 | 0.07622200  | 0.54673100  |
| O | -2.93275800 | 2.36690100  | -0.31523400 | O | -1.09859800 | 1.16539100  | 0.06333000  |
| C | 2.41164700  | 4.89220800  | -0.40598000 | H | -2.87014300 | -2.06212700 | -0.02983000 |
| C | 3.73813700  | 4.51139600  | -0.55007200 | O | -2.93621800 | 2.36741300  | -0.10508100 |
| C | 4.69442700  | 5.50850700  | -0.73589000 | C | 2.42011400  | 4.89963700  | -0.46576300 |
| C | 4.34395200  | 6.85320200  | -0.77627000 | C | 3.75131500  | 4.51942000  | -0.55730200 |
| C | 3.00632200  | 7.22566600  | -0.62747300 | C | 4.71092600  | 5.51927500  | -0.71694300 |
| C | 2.04014600  | 6.22931600  | -0.44499100 | C | 4.35682300  | 6.86179700  | -0.78435800 |
| H | 4.04622000  | 3.47486600  | -0.52233300 | C | 3.01179000  | 7.23340300  | -0.69020600 |
| H | 5.10753800  | 7.60660000  | -0.92649800 | C | 2.04214800  | 6.23357500  | -0.53168600 |
| H | 0.99863100  | 6.50968500  | -0.33638500 | H | 4.05824400  | 3.48354400  | -0.50775400 |
| N | 2.62915400  | 8.56342600  | -0.71661800 | H | 5.12049000  | 7.61918000  | -0.91141400 |
| H | 1.75324800  | 8.79847900  | -0.27507800 | H | 0.99714100  | 6.51336800  | -0.46255900 |
| H | 3.35508800  | 9.23151900  | -0.50648000 | N | 2.63503100  | 8.56446200  | -0.81152700 |
| C | 6.11231900  | 5.07813000  | -0.89068300 | H | 1.74367200  | 8.80561300  | -0.40347300 |
| O | 6.49096200  | 3.93847700  | -0.87220300 | H | 3.35103100  | 9.24073400  | -0.58954200 |
| O | 6.96143700  | 6.11297700  | -1.05895800 | C | 6.13666500  | 5.09497900  | -0.81218400 |
| H | 7.84634400  | 5.73653200  | -1.15089700 | O | 6.51355800  | 3.95186900  | -0.76265200 |
| H | -3.86888000 | 2.22294800  | -0.48821300 | O | 6.98328200  | 6.12552200  | -0.96158000 |
| I | 0.92012700  | 3.41053200  | -0.11568500 | H | 7.88041000  | 5.76762100  | -1.01595600 |
|   |             |             |             | H | -3.89219500 | 2.24623000  | -0.15476400 |
|   |             |             |             | I | 0.92545200  | 3.40901500  | -0.21620200 |

**Neutral-Neutral-I TCM**

**Neutral-Neutral-I DCE**

|   |             |             |             |
|---|-------------|-------------|-------------|
| N | -2.50301400 | -1.20063400 | 0.27062900  |
| H | -1.53738100 | -1.27415100 | -0.03329100 |
| C | -3.09570700 | 0.00757500  | -0.27229100 |
| C | -2.21037300 | 1.19984000  | 0.01324100  |
| H | -3.24587200 | -0.00089500 | -1.36257200 |
| H | -4.07455600 | 0.17929900  | 0.18427000  |
| O | -1.06878800 | 1.11519700  | 0.37808600  |
| H | -2.99473700 | -2.01428400 | -0.08037800 |
| O | -2.75000200 | 2.40682500  | -0.21041700 |
| C | 2.41395200  | 4.87934800  | -0.29364400 |
| C | 3.74141500  | 4.50497500  | -0.44335400 |
| C | 4.68733700  | 5.50999800  | -0.64830200 |
| C | 4.32326600  | 6.85043900  | -0.70116400 |
| C | 2.98128200  | 7.21571100  | -0.54831700 |
| C | 2.02526400  | 6.21082200  | -0.34236400 |
| H | 4.05495200  | 3.47052100  | -0.40786800 |
| H | 5.07617800  | 7.61270300  | -0.85885100 |
| H | 0.98399200  | 6.48590300  | -0.22089000 |
| N | 2.60770400  | 8.55168500  | -0.53991200 |
| H | 3.23863800  | 9.18404000  | -1.01072900 |
| H | 1.64118900  | 8.73791700  | -0.76558200 |
| C | 6.10927200  | 5.09288600  | -0.81323500 |
| O | 6.49230300  | 3.95038200  | -0.77908600 |
| O | 6.94085000  | 6.12575100  | -1.00794200 |
| H | 7.83811700  | 5.77626100  | -1.10463900 |

|   |             |            |             |
|---|-------------|------------|-------------|
| H | -3.67233800 | 2.33835800 | -0.48660000 |
| I | 0.93655300  | 3.38074000 | 0.01307600  |

**Neutral-Neutral-I Acetone**

|   |             |             |             |
|---|-------------|-------------|-------------|
| N | -2.44467600 | -1.25847700 | 0.07160700  |
| H | -1.63787800 | -1.31886300 | -0.54121100 |
| C | -3.14803300 | -0.01081000 | -0.16121500 |
| C | -2.20918100 | 1.16455200  | -0.00837100 |
| H | -3.59856200 | 0.08767800  | -1.16003300 |
| H | -3.95728100 | 0.09752100  | 0.56619800  |
| O | -1.01369100 | 1.06830100  | 0.06927700  |
| H | -3.05109900 | -2.03909400 | -0.15318500 |
| O | -2.77994700 | 2.37822100  | -0.00494900 |
| C | 2.43328900  | 4.88366200  | -0.38776900 |
| C | 3.77058500  | 4.52057200  | -0.45591100 |
| C | 4.71814100  | 5.53306700  | -0.61072400 |
| C | 4.34592300  | 6.86954300  | -0.69504500 |
| C | 2.99374800  | 7.22376000  | -0.62417300 |
| C | 2.03605500  | 6.21102800  | -0.46829700 |
| H | 4.09033400  | 3.48932100  | -0.39426900 |
| H | 5.09975900  | 7.63757200  | -0.81542200 |
| H | 0.98694000  | 6.47739900  | -0.41163100 |
| N | 2.60904200  | 8.55596000  | -0.64629200 |
| H | 3.26039900  | 9.19128300  | -1.08461100 |
| H | 1.65548500  | 8.73245300  | -0.92827500 |
| C | 6.15135800  | 5.12875100  | -0.68453900 |
| O | 6.54137800  | 3.98954500  | -0.61944200 |

O 6.98360600 6.16772800 -0.83260200  
H 7.88873000 5.82733400 -0.87322200  
H -3.74223800 2.31956600 -0.06066600  
I 0.95730900 3.36963700 -0.15735100

**Neutral-Neutral-I DMSO**

N -2.49900200 -1.16139300 0.46103800  
H -1.59410100 -1.33906400 0.03682800  
C -3.13776200 -0.03747700 -0.19926300  
C -2.24310900 1.18040400 -0.15881000  
H -3.38077400 -0.20164100 -1.25946500  
H -4.07477400 0.20538800 0.30942000  
O -1.08828800 1.15910000 0.17526200  
H -3.05932700 -1.99581700 0.32824800  
O -2.79556100 2.33231500 -0.56525200  
C 2.42742900 4.90235700 -0.35994900  
C 3.75177000 4.52274100 -0.52298600  
C 4.70834100 5.52792800 -0.67172400  
C 4.35720900 6.87281500 -0.65584700  
C 3.01783300 7.24327700 -0.48917800  
C 2.05110800 6.23807000 -0.34011500  
H 4.05441800 3.48454800 -0.53931400  
H 5.11735000 7.63525000 -0.77289900  
H 1.01200200 6.51669300 -0.20933200  
N 2.65771200 8.57996800 -0.41065700  
H 3.29684100 9.23001300 -0.84550600  
H 1.69385300 8.78822100 -0.62945500

C 6.12721100 5.10600200 -0.85221200  
O 6.49805100 3.95841200 -0.87363200  
O 6.96859500 6.13798700 -0.99166600  
H 7.86375500 5.78757100 -1.10559900  
H -3.72590800 2.21917900 -0.79874200  
I 0.93462200 3.40436300 -0.13131600

**Neutral-Neutral-I Water**

N -2.49691500 -1.23877400 0.22051200  
H -1.64284900 -1.38159900 -0.30901400  
C -3.12953500 0.00031500 -0.19299400  
C -2.17940100 1.16440900 -0.02555700  
H -3.45967500 0.02256200 -1.24205500  
H -4.01383900 0.18751900 0.42260500  
O -1.00824500 1.05272100 0.22249500  
H -3.11023100 -2.01865900 0.01179500  
O -2.70439200 2.38430800 -0.20966400  
C 2.43253800 4.87796900 -0.34605300  
C 3.76636300 4.51627200 -0.46701400  
C 4.70761400 5.53178100 -0.64081700  
C 4.33233000 6.86908500 -0.69158000  
C 2.98341500 7.22161600 -0.56708600  
C 2.03188100 6.20592900 -0.39248500  
H 4.08792900 3.48429600 -0.43247900  
H 5.08099400 7.63962600 -0.82720200  
H 0.98550900 6.47065500 -0.29459000  
N 2.59810300 8.55329200 -0.55484800

|   |             |            |             |
|---|-------------|------------|-------------|
| H | 3.23345700  | 9.19586400 | -1.00600900 |
| H | 1.63501500  | 8.73356200 | -0.80011800 |
| C | 6.13744700  | 5.12956500 | -0.77335500 |
| O | 6.52906300  | 3.98923900 | -0.73800400 |
| O | 6.96287900  | 6.17047700 | -0.93826800 |
| H | 7.86685100  | 5.83319600 | -1.01650400 |
| H | -3.65071000 | 2.34085900 | -0.39759600 |
| I | 0.96389900  | 3.36112500 | -0.08624100 |

|    |             |            |             |
|----|-------------|------------|-------------|
| H  | 0.74947000  | 6.09697200 | -0.44789700 |
| Cl | 1.09173100  | 3.28248500 | -0.41070200 |
| N  | 2.29925200  | 8.25995400 | -0.66594900 |
| H  | 1.41984600  | 8.42969200 | -0.19829200 |
| H  | 2.99755400  | 8.93389100 | -0.38479800 |
| C  | 6.04575000  | 4.99922600 | -0.83901300 |
| O  | 6.36056200  | 3.79126600 | -0.82137100 |
| O  | 6.80096500  | 5.98991200 | -0.93717200 |
| H  | -3.50554000 | 2.39802500 | -0.34992000 |

**Anion-Neutral-Cl Vacuum SP**

|   |             |             |             |
|---|-------------|-------------|-------------|
| N | -2.70583100 | -1.21378400 | 0.46891600  |
| H | -1.80639300 | -1.40259200 | 0.03770300  |
| C | -3.24543500 | 0.02461500  | -0.06200500 |
| C | -2.14298400 | 1.05440900  | -0.20504800 |
| H | -3.70080200 | -0.06446700 | -1.05978900 |
| H | -4.01422900 | 0.41872900  | 0.60930000  |
| O | -0.97584500 | 0.78697100  | -0.19649100 |
| H | -3.32154900 | -1.98912100 | 0.25592700  |
| O | -2.54551500 | 2.32223900  | -0.40035700 |
| C | 2.27026300  | 4.57942300  | -0.52932800 |
| C | 3.61555500  | 4.26332500  | -0.62840400 |
| C | 4.53750700  | 5.30717400  | -0.72551900 |
| C | 4.09821900  | 6.62500400  | -0.71972500 |
| C | 2.73780400  | 6.93138000  | -0.61571200 |
| C | 1.81050700  | 5.88918500  | -0.52228800 |
| H | 3.96116000  | 3.23834100  | -0.63034500 |
| H | 4.83714000  | 7.41448600  | -0.79846700 |

**Anion-Neutral-Cl TCM ModRedundant**

|   |             |             |             |
|---|-------------|-------------|-------------|
| N | -2.70583100 | -1.21378400 | 0.46891600  |
| H | -1.80639300 | -1.40259200 | 0.03770300  |
| C | -3.24543500 | 0.02461500  | -0.06200500 |
| C | -2.14298400 | 1.05440900  | -0.20504800 |
| H | -3.70080200 | -0.06446700 | -1.05978900 |
| H | -4.01422900 | 0.41872900  | 0.60930000  |
| O | -0.97584500 | 0.78697100  | -0.19649100 |
| H | -3.32154900 | -1.98912100 | 0.25592700  |
| O | -2.54551500 | 2.32223900  | -0.40035700 |
| C | 2.27026300  | 4.57942300  | -0.52932800 |
| C | 3.61555500  | 4.26332500  | -0.62840400 |
| C | 4.53750700  | 5.30717400  | -0.72551900 |
| C | 4.09821900  | 6.62500400  | -0.71972500 |
| C | 2.73780400  | 6.93138000  | -0.61571200 |
| C | 1.81050700  | 5.88918500  | -0.52228800 |
| H | 3.96116000  | 3.23834100  | -0.63034500 |

|                   |             |            |             |    |             |            |             |
|-------------------|-------------|------------|-------------|----|-------------|------------|-------------|
| H                 | 4.83714000  | 7.41448600 | -0.79846700 | C  | 4.53204900  | 5.30184900 | -0.68683900 |
| H                 | 0.74947000  | 6.09697200 | -0.44789700 | C  | 4.09857100  | 6.62151900 | -0.69044100 |
| Cl                | 1.09173100  | 3.28248500 | -0.41070200 | C  | 2.73496800  | 6.93316200 | -0.64314800 |
| N                 | 2.29925200  | 8.25995400 | -0.66594900 | C  | 1.80124000  | 5.89242000 | -0.59575300 |
| H                 | 1.41984600  | 8.42969200 | -0.19829200 | H  | 3.94366100  | 3.23321900 | -0.63239600 |
| H                 | 2.99755400  | 8.93389100 | -0.38479800 | H  | 4.84102400  | 7.41021800 | -0.73203700 |
| C                 | 6.04575000  | 4.99922600 | -0.83901300 | H  | 0.73891000  | 6.10404200 | -0.56443500 |
| O                 | 6.36056200  | 3.79126600 | -0.82137100 | Cl | 1.07050500  | 3.28785200 | -0.53446300 |
| O                 | 6.80096500  | 5.98991200 | -0.93717200 | N  | 2.30464300  | 8.26038600 | -0.70613600 |
| H                 | -3.50554000 | 2.39802500 | -0.34992000 | H  | 1.39933900  | 8.43349500 | -0.29197800 |
|                   |             |            |             | H  | 2.98766800  | 8.93565000 | -0.39224000 |
| A 15 10 7 120.0 F |             |            |             | C  | 6.03902800  | 4.98859200 | -0.73944700 |
| D 15 10 7 4 5.0 F |             |            |             | O  | 6.35121700  | 3.77861700 | -0.73584900 |
| D 9 4 7 19 5.0 F  |             |            |             | O  | 6.80692000  | 5.97434900 | -0.78146600 |
|                   |             |            |             | H  | -3.49646900 | 2.41179800 | -0.22539800 |

**Anion-Neutral-Cl DCE**

|   |             |             |             |
|---|-------------|-------------|-------------|
| N | -2.61135600 | -1.22830600 | 0.40473100  |
| H | -1.88090300 | -1.47493400 | -0.25542000 |
| C | -3.21007500 | 0.03653900  | 0.01908900  |
| C | -2.13256100 | 1.06061800  | -0.26680500 |
| H | -3.83314600 | -0.00563500 | -0.88681300 |
| H | -3.84499800 | 0.41011800  | 0.82757900  |
| O | -0.97386000 | 0.79259800  | -0.41665100 |
| H | -3.30751600 | -1.96412300 | 0.37843500  |
| O | -2.55085500 | 2.33086500  | -0.39940200 |
| C | 2.25704100  | 4.58172100  | -0.59265700 |
| C | 3.60411300  | 4.26011300  | -0.63680200 |

**Anion-Neutral-Cl Acetone**

|   |             |             |             |
|---|-------------|-------------|-------------|
| N | -2.57097300 | -1.23629200 | 0.37546100  |
| H | -1.90845200 | -1.49934100 | -0.34707200 |
| C | -3.18497500 | 0.03466700  | 0.03522900  |
| C | -2.12210400 | 1.06709900  | -0.27182400 |
| H | -3.84405900 | 0.00696100  | -0.84513100 |
| H | -3.78767700 | 0.39154400  | 0.87510800  |
| O | -0.96406500 | 0.81039300  | -0.45061800 |
| H | -3.27946400 | -1.96026200 | 0.41196500  |
| O | -2.55151800 | 2.33484700  | -0.38644000 |
| C | 2.23751300  | 4.59358600  | -0.60821600 |

|    |             |            |             |    |             |            |             |
|----|-------------|------------|-------------|----|-------------|------------|-------------|
| C  | 3.58215900  | 4.25985300 | -0.63915000 | C  | 2.22697300  | 4.59769500 | -0.60779700 |
| C  | 4.51953600  | 5.29353300 | -0.67698100 | C  | 3.57038100  | 4.25849400 | -0.63653800 |
| C  | 4.09842700  | 6.61728900 | -0.68331900 | C  | 4.51187600  | 5.28841600 | -0.67401600 |
| C  | 2.73670700  | 6.94125000 | -0.65070100 | C  | 4.09631000  | 6.61396800 | -0.68281300 |
| C  | 1.79347500  | 5.90803300 | -0.61397500 | C  | 2.73554200  | 6.94350000 | -0.65298200 |
| H  | 3.91199600  | 3.22987900 | -0.63360800 | C  | 1.78816700  | 5.91372100 | -0.61585700 |
| H  | 4.84690400  | 7.40066400 | -0.71509100 | H  | 3.89574700  | 3.22715700 | -0.62958500 |
| H  | 0.73291300  | 6.12949500 | -0.59214800 | H  | 4.84698100  | 7.39521000 | -0.71429300 |
| Cl | 1.04033600  | 3.30931300 | -0.56263800 | H  | 0.72854800  | 6.13976100 | -0.59524800 |
| N  | 2.31926100  | 8.27056400 | -0.71781900 | Cl | 1.02568800  | 3.31746100 | -0.56160700 |
| H  | 1.40684100  | 8.45238300 | -0.32351500 | N  | 2.32368200  | 8.27343900 | -0.72352600 |
| H  | 3.00173300  | 8.94239600 | -0.39545200 | H  | 1.40925400  | 8.46000200 | -0.33607200 |
| C  | 6.02236000  | 4.96561700 | -0.71249700 | H  | 3.00667200  | 8.94459600 | -0.40077000 |
| O  | 6.32473600  | 3.75246500 | -0.70785400 | C  | 6.01238000  | 4.95347400 | -0.70620800 |
| O  | 6.80265400  | 5.94241100 | -0.74335400 | O  | 6.31035800  | 3.73885100 | -0.69762900 |
| H  | -3.49510000 | 2.40839400 | -0.19710500 | O  | 6.79859200  | 5.92567900 | -0.73865800 |
|    |             |            |             | H  | -3.48921200 | 2.40974100 | -0.18956800 |

#### Anion-Neutral-Cl DMSO

|   |             |             |             |
|---|-------------|-------------|-------------|
| N | -2.55505800 | -1.23770900 | 0.36223500  |
| H | -1.91549200 | -1.50561200 | -0.37903300 |
| C | -3.17219300 | 0.03594800  | 0.03713000  |
| C | -2.11297100 | 1.07192600  | -0.26905800 |
| H | -3.83872800 | 0.01460900  | -0.83760400 |
| H | -3.76824900 | 0.38527200  | 0.88481200  |
| O | -0.95386200 | 0.81960100  | -0.45076400 |
| H | -3.26712000 | -1.95725800 | 0.41700000  |
| O | -2.54510600 | 2.33879900  | -0.37829600 |

#### Anion-Neutral-Cl Water

|   |             |             |             |
|---|-------------|-------------|-------------|
| N | -2.58652300 | -1.19186500 | 0.50052600  |
| H | -1.83171500 | -1.49753100 | -0.10546800 |
| C | -3.19043200 | 0.01297700  | -0.04016300 |
| C | -2.14009800 | 1.08098300  | -0.25293100 |
| H | -3.69183700 | -0.11864000 | -1.01019600 |
| H | -3.94044100 | 0.39428000  | 0.65783700  |
| O | -0.95729800 | 0.88121300  | -0.21508800 |
| H | -3.27381400 | -1.93690600 | 0.51950900  |

|    |             |            |             |    |             |             |             |
|----|-------------|------------|-------------|----|-------------|-------------|-------------|
| O  | -2.60048000 | 2.30978500 | -0.54097200 | H  | -3.26979900 | -1.96511100 | -0.31580300 |
| C  | 2.23741800  | 4.60610300 | -0.53605700 | O  | -2.50781600 | 2.38544600  | 0.02076900  |
| C  | 3.57649600  | 4.26517900 | -0.64251200 | C  | 2.35178000  | 4.67837900  | -0.32386900 |
| C  | 4.51662200  | 5.29391800 | -0.72489900 | C  | 3.69309800  | 4.35413300  | -0.45236000 |
| C  | 4.10333700  | 6.62015500 | -0.70040500 | C  | 4.61082900  | 5.38957400  | -0.64249200 |
| C  | 2.74716400  | 6.95150600 | -0.59077600 | C  | 4.17229300  | 6.70617700  | -0.69841800 |
| C  | 1.80124700  | 5.92267000 | -0.50874300 | C  | 2.81588800  | 7.02075700  | -0.57113100 |
| H  | 3.89926900  | 3.23316400 | -0.66132500 | C  | 1.89264500  | 5.98789500  | -0.37946800 |
| H  | 4.85162100  | 7.40138700 | -0.76894400 | H  | 4.04346800  | 3.33177000  | -0.41200900 |
| H  | 0.74504600  | 6.15022500 | -0.42562100 | H  | 4.90912100  | 7.48794200  | -0.84480600 |
| Cl | 1.03901500  | 3.32704500 | -0.43384300 | H  | 0.83708300  | 6.20816500  | -0.27204700 |
| N  | 2.33490000  | 8.28222500 | -0.62650300 | N  | 2.38917700  | 8.35418500  | -0.57479300 |
| H  | 1.44230000  | 8.46686900 | -0.19033900 | H  | 3.01536100  | 8.98400100  | -1.05670400 |
| H  | 3.03518800  | 8.94997800 | -0.33567000 | H  | 1.43454400  | 8.48841600  | -0.87734700 |
| C  | 6.01199900  | 4.95564600 | -0.84335800 | C  | 6.11365100  | 5.07260800  | -0.79696400 |
| O  | 6.30701000  | 3.74019300 | -0.85587400 | O  | 6.42962600  | 3.86698500  | -0.72366800 |
| O  | 6.79870100  | 5.92542100 | -0.91616900 | O  | 6.86343900  | 6.05501800  | -0.98196400 |
| H  | -3.56553400 | 2.34075900 | -0.52876100 | H  | -3.45805400 | 2.45783000  | -0.12730900 |
|    |             |            |             | Br | 1.07326600  | 3.28153000  | -0.06493300 |

**Anion-Neutral-Br Vacuum SP**

|   |             |             |             |
|---|-------------|-------------|-------------|
| N | -2.72537600 | -1.25010600 | 0.15114500  |
| H | -1.75633500 | -1.36529900 | -0.12828200 |
| C | -3.18592400 | 0.07094600  | -0.23479600 |
| C | -2.11310600 | 1.10137100  | 0.05094500  |
| H | -3.42539800 | 0.17991400  | -1.30342700 |
| H | -4.08760800 | 0.33449100  | 0.32597100  |
| O | -0.96374000 | 0.82927300  | 0.25095100  |

**Anion-Neutral-Br TCM ModRedundant**

|   |             |             |             |
|---|-------------|-------------|-------------|
| N | -2.72537600 | -1.25010600 | 0.15114500  |
| H | -1.75633500 | -1.36529900 | -0.12828200 |
| C | -3.18592400 | 0.07094600  | -0.23479600 |
| C | -2.11310600 | 1.10137100  | 0.05094500  |
| H | -3.42539800 | 0.17991400  | -1.30342700 |
| H | -4.08760800 | 0.33449100  | 0.32597100  |

|                    |             |             |             |    |             |             |             |
|--------------------|-------------|-------------|-------------|----|-------------|-------------|-------------|
| O                  | -0.96374000 | 0.82927300  | 0.25095100  | H  | -1.76039100 | -1.38798800 | -0.26076200 |
| H                  | -3.26979900 | -1.96511100 | -0.31580300 | C  | -3.17575800 | 0.06760500  | -0.21474100 |
| O                  | -2.50781600 | 2.38544600  | 0.02076900  | C  | -2.11249700 | 1.11126000  | 0.05187300  |
| C                  | 2.35178000  | 4.67837900  | -0.32386900 | H  | -3.45625200 | 0.18687400  | -1.27201100 |
| C                  | 3.69309800  | 4.35413300  | -0.45236000 | H  | -4.06107500 | 0.30784200  | 0.38082100  |
| C                  | 4.61082900  | 5.38957400  | -0.64249200 | O  | -0.95753800 | 0.85602900  | 0.25096900  |
| C                  | 4.17229300  | 6.70617700  | -0.69841800 | H  | -3.29111000 | -1.96380900 | -0.25049200 |
| C                  | 2.81588800  | 7.02075700  | -0.57113100 | O  | -2.51908100 | 2.39067400  | 0.01226300  |
| C                  | 1.89264500  | 5.98789500  | -0.37946800 | C  | 2.34875500  | 4.68120200  | -0.33147800 |
| H                  | 4.04346800  | 3.33177000  | -0.41200900 | C  | 3.69051800  | 4.35432600  | -0.45106400 |
| H                  | 4.90912100  | 7.48794200  | -0.84480600 | C  | 4.61030500  | 5.38856800  | -0.63736800 |
| H                  | 0.83708300  | 6.20816500  | -0.27204700 | C  | 4.17492000  | 6.70613400  | -0.69789000 |
| N                  | 2.38917700  | 8.35418500  | -0.57479300 | C  | 2.81733800  | 7.02359100  | -0.57898400 |
| H                  | 3.01536100  | 8.98400100  | -1.05670400 | C  | 1.89153800  | 5.99063800  | -0.39293100 |
| H                  | 1.43454400  | 8.48841600  | -0.87734700 | H  | 4.03716500  | 3.33104200  | -0.40631800 |
| C                  | 6.11365100  | 5.07260800  | -0.79696400 | H  | 4.91144300  | 7.48862300  | -0.84077400 |
| O                  | 6.42962600  | 3.86698500  | -0.72366800 | H  | 0.83556800  | 6.21284800  | -0.29451100 |
| O                  | 6.86343900  | 6.05501800  | -0.98196400 | N  | 2.39369900  | 8.35448300  | -0.58352400 |
| H                  | -3.45805400 | 2.45783000  | -0.12730900 | H  | 3.01773200  | 8.98905900  | -1.06188800 |
| Br                 | 1.07326600  | 3.28153000  | -0.06493300 | H  | 1.43558600  | 8.49406600  | -0.87245500 |
|                    |             |             |             | C  | 6.11011400  | 5.06757300  | -0.78046900 |
| A 15 10 7 120.0 F  |             |             |             | O  | 6.42480600  | 3.85971400  | -0.71794700 |
| D 15 10 7 4 15.0 F |             |             |             | O  | 6.87069800  | 6.04602600  | -0.94671700 |
| D 9 4 7 26 -15.0 F |             |             |             | H  | -3.46893500 | 2.45610000  | -0.14493400 |
|                    |             |             |             | Br | 1.06838100  | 3.28566000  | -0.07983000 |

**Anion-Neutral-Br DCE ModRedundant**

|   |             |             |            |                   |
|---|-------------|-------------|------------|-------------------|
| N | -2.68382000 | -1.25184800 | 0.13835300 | A 15 10 7 120.0 F |
|---|-------------|-------------|------------|-------------------|



D 15 10 7 4 15.0 F

D 9 4 7 26 -15.0 F

O 6.86928000 6.00635000 -0.96088100

H -3.49739000 2.42809400 -0.33266900

Br 1.03476400 3.31816500 -0.09199100

**Anion-Neutral-Br Acetone**

N -2.64506500 -1.24346600 0.21002500

H -1.73803500 -1.41185800 -0.21345800

C -3.15362700 0.04703400 -0.21897600

C -2.12974800 1.13053000 0.04072300

H -3.40221700 0.11286400 -1.28868400

H -4.06445900 0.28789700 0.33603400

O -0.98419600 0.91992900 0.32998600

H -3.26597800 -1.97864500 -0.10869100

O -2.55809300 2.39423800 -0.11231100

C 2.33031500 4.69956700 -0.34089300

C 3.66608300 4.35549600 -0.47944700

C 4.59878700 5.37971100 -0.65702300

C 4.18215300 6.70440500 -0.69115500

C 2.83019500 7.03936600 -0.55260000

C 1.89156200 6.01606900 -0.37328600

H 3.99816200 3.32670600 -0.45419800

H 4.92665900 7.48025100 -0.82841000

H 0.84011600 6.25187100 -0.25973200

N 2.42621400 8.37447200 -0.52947800

H 3.05277700 9.01091600 -1.00205200

H 1.46560500 8.53437000 -0.79910800

C 6.09081300 5.03811200 -0.81680700

O 6.38743400 3.82384700 -0.78772800

**Anion-Neutral-Br DMSO**

N -2.62862900 -1.25043500 0.20438900

H -1.74349400 -1.42533700 -0.26068600

C -3.15308000 0.03885100 -0.20925900

C -2.13042200 1.12774800 0.03079300

H -3.42692200 0.10589500 -1.27259500

H -4.05249000 0.27303900 0.36669700

O -0.97844500 0.92432800 0.30129200

H -3.26629800 -1.98455800 -0.08232500

O -2.56725800 2.38879300 -0.11682900

C 2.32581200 4.70897900 -0.34427500

C 3.66077700 4.35950500 -0.47822500

C 4.59793500 5.38003700 -0.65347200

C 4.18687700 6.70645100 -0.69006300

C 2.83556000 7.04693500 -0.55610300

C 1.89233300 6.02697900 -0.37919600

H 3.98833800 3.32933700 -0.45106000

H 4.93419000 7.47983900 -0.82565300

H 0.84143400 6.26717600 -0.26999600

N 2.43691200 8.38268700 -0.53466100

H 3.06609900 9.01797700 -1.00530900

H 1.47658100 8.54706600 -0.80268000

C 6.08819700 5.03210900 -0.80728000

O 6.37963500 3.81604800 -0.78527300  
O 6.87364000 5.99655300 -0.93984100  
H -3.51036800 2.41843600 -0.32159600  
Br 1.02519700 3.33185300 -0.09960400

C 6.08796700 5.02975200 -0.79836200  
O 6.37724900 3.81303400 -0.77744000  
O 6.87625500 5.99263700 -0.92568100  
H -3.51897900 2.41328500 -0.30626800  
Br 1.02051900 3.33835000 -0.10641400

**Anion-Neutral-Br Water**

N -2.61822700 -1.25534300 0.19503400  
H -1.74676300 -1.42930100 -0.29552300  
C -3.15401300 0.03473800 -0.20136900  
C -2.13122900 1.12595000 0.02724500  
H -3.44738100 0.10690800 -1.25908700  
H -4.04377900 0.26270800 0.39184000  
O -0.97515500 0.92572700 0.28294200  
H -3.26375000 -1.98843700 -0.07643100  
O -2.57344900 2.38591900 -0.11239800  
C 2.32379600 4.71344700 -0.34780800  
C 3.65862100 4.36154200 -0.47718000  
C 4.59805800 5.38036300 -0.65017100  
C 4.18949600 6.70748000 -0.68924100  
C 2.83826300 7.05044700 -0.55989700  
C 1.89270700 6.03210100 -0.38522600  
H 3.98416500 3.33079500 -0.44807500  
H 4.93837700 7.47962900 -0.82312800  
H 0.84187700 6.27426500 -0.27984200  
N 2.44193500 8.38658200 -0.54062300  
H 3.07324800 9.02096100 -1.00964800  
H 1.48230500 8.55275400 -0.81005800

**Anion-Neutral-I Vacuum ModRedundant**

N -2.83443200 -1.39211100 -0.09088100  
H -2.37957200 -1.54926900 0.80269500  
C -3.31393800 -0.03077200 -0.15244200  
C -2.24348200 1.03912600 0.06282700  
H -3.78252900 0.14828400 -1.12630400  
H -4.09581600 0.11711300 0.60053600  
O -1.09741700 0.79199400 0.27910700  
H -2.10998900 -1.52664700 -0.78899800  
O -2.67623000 2.31482800 -0.00829300  
C 2.49246100 4.86641100 -0.42156900  
C 3.82873000 4.52590800 -0.53947200  
C 4.75871300 5.54427500 -0.76674300  
C 4.33071800 6.86080000 -0.86859900  
C 2.98112000 7.18973500 -0.74606000  
C 2.04361900 6.17827600 -0.52523200  
H 4.19215000 3.50933200 -0.46270400  
H 5.08839900 7.61936700 -1.04107900  
H 0.98956100 6.41682100 -0.44211700  
N 2.54912400 8.52864900 -0.89438900  
H 1.74647400 8.75048000 -0.32145600

|   |             |            |             |
|---|-------------|------------|-------------|
| H | 3.29423000  | 9.18895500 | -0.71903000 |
| C | 6.27651700  | 5.20824300 | -0.89658100 |
| O | 6.55527000  | 4.00045100 | -0.80484500 |
| O | 7.01326600  | 6.19618800 | -1.07491000 |
| H | -3.61553600 | 2.34772800 | -0.21610800 |
| I | 1.03916100  | 3.32950500 | -0.08119900 |

A 15 10 7 120.0 F

D 15 10 7 4 15.0 F

D 9 4 7 26 -15.0 F

**Anion-Neutral-I TCM**

|   |             |             |             |
|---|-------------|-------------|-------------|
| N | -2.58756200 | -1.22042500 | 0.30721700  |
| H | -1.57985000 | -1.23055600 | 0.18532400  |
| C | -3.13235800 | 0.00325000  | -0.25095100 |
| C | -2.25965500 | 1.18170900  | 0.12513700  |
| H | -3.19813100 | 0.01921500  | -1.34946000 |
| H | -4.14157000 | 0.17557800  | 0.13520500  |
| O | -1.14328200 | 1.07517100  | 0.54970200  |
| H | -2.96591400 | -2.02704900 | -0.17442100 |
| O | -2.78523900 | 2.39871400  | -0.08682900 |
| C | 2.43298400  | 4.86195300  | -0.36515100 |
| C | 3.75674600  | 4.49223700  | -0.54831300 |
| C | 4.70126100  | 5.49147500  | -0.79602200 |
| C | 4.30643100  | 6.82133400  | -0.85656300 |
| C | 2.96989000  | 7.18505800  | -0.67056000 |
| C | 2.02064700  | 6.18732200  | -0.42259300 |

|   |             |            |             |
|---|-------------|------------|-------------|
| H | 4.08274900  | 3.46187500 | -0.50576200 |
| H | 5.06290600  | 7.57416100 | -1.04803600 |
| H | 0.97998900  | 6.45419100 | -0.27985600 |
| N | 2.57158300  | 8.52311000 | -0.78714100 |
| H | 1.73917900  | 8.75836200 | -0.26457200 |
| H | 3.31199800  | 9.18673900 | -0.60584300 |
| C | 6.18581500  | 5.12051900 | -0.99787200 |
| O | 6.45795200  | 3.90264300 | -0.95609500 |
| O | 6.96750400  | 6.07798100 | -1.18179400 |
| H | -3.68922000 | 2.34011100 | -0.41843400 |
| I | 0.96571500  | 3.35899200 | 0.01983800  |

**Anion-Neutral-I DCE**

|   |             |             |             |
|---|-------------|-------------|-------------|
| N | -2.50181100 | -1.28629000 | 0.08315100  |
| H | -1.65103000 | -1.28843000 | -0.47058400 |
| C | -3.20538700 | -0.03142800 | -0.10760900 |
| C | -2.25721300 | 1.13383100  | 0.06912700  |
| H | -3.65907400 | 0.09767300  | -1.10171500 |
| H | -4.01079800 | 0.05941900  | 0.62673900  |
| O | -1.06154600 | 1.02841400  | 0.08958900  |
| H | -3.07575300 | -2.05743600 | -0.23765100 |
| O | -2.82366600 | 2.34697400  | 0.16084800  |
| C | 2.46004500  | 4.87679100  | -0.47962000 |
| C | 3.80000300  | 4.52141700  | -0.53168500 |
| C | 4.75286900  | 5.52945600  | -0.69897700 |
| C | 4.35256400  | 6.85422500  | -0.81492700 |
| C | 2.99934100  | 7.20399100  | -0.76515300 |

|   |             |            |             |
|---|-------------|------------|-------------|
| C | 2.04203200  | 6.19624400 | -0.59441800 |
| H | 4.12818800  | 3.49468200 | -0.44406500 |
| H | 5.11321200  | 7.61562200 | -0.94580900 |
| H | 0.98983800  | 6.45362700 | -0.55537100 |
| N | 2.59904200  | 8.53118300 | -0.94348800 |
| H | 1.70901000  | 8.76453000 | -0.52586700 |
| H | 3.30498100  | 9.21382100 | -0.70508500 |
| C | 6.25050900  | 5.17386600 | -0.75054600 |
| O | 6.53355000  | 3.95828400 | -0.68432800 |
| O | 7.04227900  | 6.13626800 | -0.85263300 |
| H | -3.78714900 | 2.29024900 | 0.14876500  |
| I | 0.98653400  | 3.35668800 | -0.21253500 |

|   |             |            |             |
|---|-------------|------------|-------------|
| C | 3.02020800  | 7.23490600 | -0.60692800 |
| C | 2.05152200  | 6.23608600 | -0.44481900 |
| H | 4.07114100  | 3.48875200 | -0.65891400 |
| H | 5.12284400  | 7.61789700 | -0.91486200 |
| H | 1.01261600  | 6.51114200 | -0.30504300 |
| N | 2.64509400  | 8.57885000 | -0.64818100 |
| H | 1.78835400  | 8.79701700 | -0.15869000 |
| H | 3.38186900  | 9.22642200 | -0.40530900 |
| C | 6.20633700  | 5.13869600 | -0.99971600 |
| O | 6.46153200  | 3.91480000 | -1.02823900 |
| O | 7.01658200  | 6.08506700 | -1.11084300 |
| H | -3.78472400 | 2.19245300 | -0.71609700 |
| I | 0.95062600  | 3.40024600 | -0.20232300 |

**Anion-Neutral-I Acetone**

|   |             |             |             |
|---|-------------|-------------|-------------|
| N | -2.53377000 | -1.17924900 | 0.53087900  |
| H | -1.61693800 | -1.33667700 | 0.12463600  |
| C | -3.17990200 | -0.06346900 | -0.13578400 |
| C | -2.28477700 | 1.15518200  | -0.11505700 |
| H | -3.42889400 | -0.23832700 | -1.19301700 |
| H | -4.11413500 | 0.18262600  | 0.37659800  |
| O | -1.12315000 | 1.13299600  | 0.19058900  |
| H | -3.07545600 | -2.02372000 | 0.38589900  |
| O | -2.84849300 | 2.30693100  | -0.50942300 |
| C | 2.44166500  | 4.90344200  | -0.46484300 |
| C | 3.76470300  | 4.52582700  | -0.64315900 |
| C | 4.72919800  | 5.52388400  | -0.80453900 |
| C | 4.35651800  | 6.86188700  | -0.78666000 |

**Anion-Neutral-I DMSO**

|   |             |             |             |
|---|-------------|-------------|-------------|
| N | -2.52407800 | -1.18342500 | 0.52053900  |
| H | -1.62767900 | -1.35951100 | 0.07799500  |
| C | -3.17757500 | -0.06021900 | -0.12653700 |
| C | -2.27720800 | 1.15448500  | -0.11699000 |
| H | -3.45038700 | -0.22826400 | -1.17886500 |
| H | -4.09950800 | 0.18775600  | 0.40668900  |
| O | -1.11214500 | 1.12918000  | 0.17701500  |
| H | -3.08566600 | -2.01876900 | 0.39958200  |
| O | -2.84009400 | 2.30802900  | -0.50613600 |
| C | 2.44007000  | 4.90420500  | -0.46621800 |
| C | 3.76375900  | 4.52601700  | -0.63971400 |
| C | 4.72887200  | 5.52367000  | -0.79980300 |

|   |             |            |             |
|---|-------------|------------|-------------|
| C | 4.35673500  | 6.86197300 | -0.78519800 |
| C | 3.01965800  | 7.23571100 | -0.61049200 |
| C | 2.05027200  | 6.23684800 | -0.44972100 |
| H | 4.06930200  | 3.48866000 | -0.65269500 |
| H | 5.12300200  | 7.61820500 | -0.91240400 |
| H | 1.01108600  | 6.51260200 | -0.31354400 |
| N | 2.64493500  | 8.57855200 | -0.65618100 |
| H | 1.78352000  | 8.79857800 | -0.17586200 |
| H | 3.37925600  | 9.22846800 | -0.41229600 |
| C | 6.20537800  | 5.13743200 | -0.99104800 |
| O | 6.46117600  | 3.91322400 | -1.01678000 |
| O | 7.01757300  | 6.08226100 | -1.10300500 |
| H | -3.77866800 | 2.19733800 | -0.70487700 |
| I | 0.94898500  | 3.40066300 | -0.20730000 |

|   |             |            |             |
|---|-------------|------------|-------------|
| C | 4.73805700  | 5.52872200 | -0.65877600 |
| C | 4.34101000  | 6.85928900 | -0.69670700 |
| C | 2.99272500  | 7.21203200 | -0.57031500 |
| C | 2.03875700  | 6.19992200 | -0.39971500 |
| H | 4.11345000  | 3.48669800 | -0.46268700 |
| H | 5.09645900  | 7.62565800 | -0.82755500 |
| H | 0.99163300  | 6.45980100 | -0.29772500 |
| N | 2.60636500  | 8.55194800 | -0.54991500 |
| H | 3.24315300  | 9.18095400 | -1.01896500 |
| H | 1.64899800  | 8.72480500 | -0.82346400 |
| C | 6.22544100  | 5.16650900 | -0.80383800 |
| O | 6.50608400  | 3.94757800 | -0.78512800 |
| O | 7.02175200  | 6.12353400 | -0.92678300 |
| H | -3.65667600 | 2.34026800 | -0.38042800 |
| I | 0.98541900  | 3.34978500 | -0.10203800 |

**Anion-Neutral-I Water**

|   |             |             |             |
|---|-------------|-------------|-------------|
| N | -2.55960700 | -1.25853200 | 0.22043000  |
| H | -1.70040600 | -1.40919900 | -0.29856600 |
| C | -3.17026700 | -0.00864800 | -0.19429700 |
| C | -2.20234800 | 1.13976400  | -0.01802200 |
| H | -3.49256200 | 0.02098300  | -1.24558900 |
| H | -4.05597000 | 0.19057900  | 0.41544000  |
| O | -1.03368700 | 1.00817200  | 0.22967900  |
| H | -3.18005700 | -2.02907800 | -0.00135500 |
| O | -2.70942000 | 2.36893700  | -0.19470500 |
| C | 2.45379700  | 4.87537500  | -0.36302100 |
| C | 3.78847200  | 4.51781300  | -0.48980100 |

**Cation-Cation-Cl Vacuum SP**

|   |             |             |             |
|---|-------------|-------------|-------------|
| N | -2.35370200 | -1.25360800 | 0.15320900  |
| H | -1.48521400 | -1.15212100 | -0.38893700 |
| C | -3.19664800 | -0.04110300 | -0.04083700 |
| C | -2.25762700 | 1.15265100  | -0.17043700 |
| H | -3.76770300 | -0.15417300 | -0.96257700 |
| H | -3.88153300 | 0.05520200  | 0.79991200  |
| O | -1.07870600 | 0.99610400  | -0.31261300 |
| H | -2.83480700 | -2.10860600 | -0.13705600 |
| O | -2.81332000 | 2.35199600  | -0.14805800 |
| C | 2.08814900  | 4.62178800  | -0.50180400 |

|    |             |             |             |    |             |             |             |
|----|-------------|-------------|-------------|----|-------------|-------------|-------------|
| C  | 3.42691800  | 4.26196000  | -0.53921500 | O  | -1.07870600 | 0.99610400  | -0.31261300 |
| C  | 4.40003200  | 5.25305200  | -0.62579900 | H  | -2.83480700 | -2.10860600 | -0.13705600 |
| C  | 4.04958000  | 6.59885100  | -0.67421300 | O  | -2.81332000 | 2.35199600  | -0.14805800 |
| C  | 2.70355700  | 6.91265100  | -0.62952900 | C  | 2.08814900  | 4.62178800  | -0.50180400 |
| C  | 1.70550200  | 5.95849400  | -0.54532100 | C  | 3.42691800  | 4.26196000  | -0.53921500 |
| H  | 3.72478200  | 3.22140400  | -0.50630100 | C  | 4.40003200  | 5.25305200  | -0.62579900 |
| H  | 4.80917100  | 7.36817900  | -0.74838100 | C  | 4.04958000  | 6.59885100  | -0.67421300 |
| H  | 0.65695800  | 6.23115300  | -0.51778000 | C  | 2.70355700  | 6.91265100  | -0.62952900 |
| Cl | 0.86988200  | 3.39401300  | -0.40800500 | C  | 1.70550200  | 5.95849400  | -0.54532100 |
| N  | 2.31612800  | 8.33763900  | -0.66777900 | H  | 3.72478200  | 3.22140400  | -0.50630100 |
| H  | 2.60947200  | 8.83140800  | 0.18289800  | H  | 4.80917100  | 7.36817900  | -0.74838100 |
| H  | 2.73933800  | 8.82052900  | -1.46769400 | H  | 0.65695800  | 6.23115300  | -0.51778000 |
| C  | 5.83245700  | 4.81837300  | -0.66924500 | Cl | 0.86988200  | 3.39401300  | -0.40800500 |
| O  | 6.17884100  | 3.67095100  | -0.60938700 | N  | 2.31612800  | 8.33763900  | -0.66777900 |
| O  | 6.67187300  | 5.84958300  | -0.78275100 | H  | 2.60947200  | 8.83140800  | 0.18289800  |
| H  | 7.57926600  | 5.51183000  | -0.81072000 | H  | 2.73933800  | 8.82052900  | -1.46769400 |
| H  | 1.30099500  | 8.44927500  | -0.74896500 | C  | 5.83245700  | 4.81837300  | -0.66924500 |
| H  | -3.76899400 | 2.32894600  | -0.00598000 | O  | 6.17884100  | 3.67095100  | -0.60938700 |
| H  | -2.07685100 | -1.36661700 | 1.13293700  | O  | 6.67187300  | 5.84958300  | -0.78275100 |

**Cation-Cation-Cl TCM**

|   |             |             |             |
|---|-------------|-------------|-------------|
| N | -2.35370200 | -1.25360800 | 0.15320900  |
| H | -1.48521400 | -1.15212100 | -0.38893700 |
| C | -3.19664800 | -0.04110300 | -0.04083700 |
| C | -2.25762700 | 1.15265100  | -0.17043700 |
| H | -3.76770300 | -0.15417300 | -0.96257700 |
| H | -3.88153300 | 0.05520200  | 0.79991200  |

|    |             |             |             |
|----|-------------|-------------|-------------|
| O  | -1.07870600 | 0.99610400  | -0.31261300 |
| H  | -2.83480700 | -2.10860600 | -0.13705600 |
| O  | -2.81332000 | 2.35199600  | -0.14805800 |
| C  | 2.08814900  | 4.62178800  | -0.50180400 |
| C  | 3.42691800  | 4.26196000  | -0.53921500 |
| C  | 4.40003200  | 5.25305200  | -0.62579900 |
| C  | 4.04958000  | 6.59885100  | -0.67421300 |
| C  | 2.70355700  | 6.91265100  | -0.62952900 |
| C  | 1.70550200  | 5.95849400  | -0.54532100 |
| H  | 3.72478200  | 3.22140400  | -0.50630100 |
| H  | 4.80917100  | 7.36817900  | -0.74838100 |
| H  | 0.65695800  | 6.23115300  | -0.51778000 |
| Cl | 0.86988200  | 3.39401300  | -0.40800500 |
| N  | 2.31612800  | 8.33763900  | -0.66777900 |
| H  | 2.60947200  | 8.83140800  | 0.18289800  |
| H  | 2.73933800  | 8.82052900  | -1.46769400 |
| C  | 5.83245700  | 4.81837300  | -0.66924500 |
| O  | 6.17884100  | 3.67095100  | -0.60938700 |
| O  | 6.67187300  | 5.84958300  | -0.78275100 |
| H  | 7.57926600  | 5.51183000  | -0.81072000 |
| H  | 1.30099500  | 8.44927500  | -0.74896500 |
| H  | -3.76899400 | 2.32894600  | -0.00598000 |
| H  | -2.07685100 | -1.36661700 | 1.13293700  |

**Cation-Cation-Cl DCE**

|   |             |             |             |
|---|-------------|-------------|-------------|
| N | -2.30416400 | -1.22671100 | 0.09972500  |
| H | -1.44268800 | -1.13505300 | -0.44985100 |

|    |             |             |             |
|----|-------------|-------------|-------------|
| C  | -3.17560400 | -0.03912200 | -0.10324200 |
| C  | -2.30007900 | 1.20077500  | -0.01895600 |
| H  | -3.63784500 | -0.10933500 | -1.08778900 |
| H  | -3.95259000 | -0.03690800 | 0.66023800  |
| O  | -1.11076400 | 1.11582300  | 0.09902200  |
| H  | -2.77823500 | -2.09214500 | -0.17069200 |
| O  | -2.91714500 | 2.36924500  | -0.10019100 |
| C  | 2.09289400  | 4.61383700  | -0.43214900 |
| C  | 3.42921300  | 4.25078700  | -0.49715400 |
| C  | 4.39983100  | 5.23999100  | -0.62819600 |
| C  | 4.04860200  | 6.58477200  | -0.69316100 |
| C  | 2.70420400  | 6.90252700  | -0.62317300 |
| C  | 1.70972200  | 5.94937700  | -0.49591600 |
| H  | 3.72643500  | 3.21081200  | -0.44889200 |
| H  | 4.80665200  | 7.35128200  | -0.79815300 |
| H  | 0.66268900  | 6.22363600  | -0.44729700 |
| Cl | 0.87552600  | 3.39220500  | -0.26768400 |
| N  | 2.31399000  | 8.32396200  | -0.68146700 |
| H  | 2.65531200  | 8.84302100  | 0.13496000  |
| H  | 2.68626300  | 8.78411800  | -1.51908700 |
| C  | 5.83000500  | 4.80601900  | -0.69956000 |
| O  | 6.18080400  | 3.65832400  | -0.63951200 |
| O  | 6.66778100  | 5.83490400  | -0.83798500 |
| H  | 7.57424100  | 5.49646700  | -0.88197900 |
| H  | 1.29587200  | 8.43420700  | -0.70451000 |
| H  | -3.87620200 | 2.28967700  | -0.19610500 |
| H  | -2.01692200 | -1.31669200 | 1.07832900  |

**Cation-Cation-Cl Acetone**

|    |             |             |             |
|----|-------------|-------------|-------------|
| N  | -2.30134900 | -1.22790600 | 0.09968200  |
| H  | -1.43691800 | -1.13625000 | -0.44472300 |
| C  | -3.16996900 | -0.03911400 | -0.10279200 |
| C  | -2.29567500 | 1.20027800  | -0.01275100 |
| H  | -3.62855700 | -0.10509200 | -1.08934800 |
| H  | -3.94998700 | -0.03815300 | 0.65752400  |
| O  | -1.10533700 | 1.11891800  | 0.10254400  |
| H  | -2.77515800 | -2.09094300 | -0.17825600 |
| O  | -2.91430000 | 2.36883800  | -0.08693500 |
| C  | 2.08966000  | 4.61757900  | -0.41998900 |
| C  | 3.42457000  | 4.25107300  | -0.48990400 |
| C  | 4.39603900  | 5.23820800  | -0.63088100 |
| C  | 4.04628400  | 6.58303000  | -0.70101400 |
| C  | 2.70301100  | 6.90457000  | -0.62615600 |
| C  | 1.70802700  | 5.95323500  | -0.48868100 |
| H  | 3.71933900  | 3.21065000  | -0.43778200 |
| H  | 4.80477800  | 7.34766900  | -0.81309200 |
| H  | 0.66187500  | 6.22951900  | -0.43580900 |
| Cl | 0.87084500  | 3.39814100  | -0.24345500 |
| N  | 2.31584600  | 8.32551000  | -0.69075800 |
| H  | 2.66877300  | 8.84991500  | 0.11714200  |
| H  | 2.67885500  | 8.77856500  | -1.53625300 |
| C  | 5.82500500  | 4.80318600  | -0.70682700 |
| O  | 6.17639300  | 3.65499300  | -0.64455500 |
| O  | 6.66353700  | 5.83018600  | -0.85175400 |

|   |             |             |             |
|---|-------------|-------------|-------------|
| H | 7.56954100  | 5.49083300  | -0.89779500 |
| H | 1.29799100  | 8.43915100  | -0.70179400 |
| H | -3.87400800 | 2.28792200  | -0.17562900 |
| H | -2.02131200 | -1.32470800 | 1.07961400  |

**Cation-Cation-Cl DMSO**

|    |             |             |             |
|----|-------------|-------------|-------------|
| N  | -2.35203700 | -1.24548500 | -0.02940200 |
| H  | -1.46330900 | -1.11173200 | -0.52495300 |
| C  | -3.16239600 | -0.00093000 | -0.08994300 |
| C  | -2.22086000 | 1.17931800  | 0.08535500  |
| H  | -3.64367300 | 0.05602700  | -1.06640500 |
| H  | -3.92464800 | -0.03618600 | 0.68654400  |
| O  | -1.03030400 | 1.03594600  | 0.08780000  |
| H  | -2.84447100 | -2.03938400 | -0.44570700 |
| O  | -2.78005300 | 2.37340100  | 0.20720600  |
| C  | 2.08591900  | 4.60998100  | -0.41993400 |
| C  | 3.42431000  | 4.25156300  | -0.45574300 |
| C  | 4.39074100  | 5.24189100  | -0.60835100 |
| C  | 4.03206000  | 6.58104300  | -0.72441700 |
| C  | 2.68557700  | 6.89500500  | -0.68128900 |
| C  | 1.69554200  | 5.93994500  | -0.53322800 |
| H  | 3.72523300  | 3.21549500  | -0.36689500 |
| H  | 4.78678600  | 7.34805000  | -0.84371200 |
| H  | 0.64671800  | 6.20957100  | -0.50577800 |
| Cl | 0.87467700  | 3.38448700  | -0.22934800 |
| N  | 2.29031200  | 8.31033500  | -0.78952100 |
| H  | 2.62126000  | 8.85662200  | 0.01321800  |

|   |             |             |             |
|---|-------------|-------------|-------------|
| H | 2.67028100  | 8.74541100  | -1.63674500 |
| C | 5.82416600  | 4.81757600  | -0.64131400 |
| O | 6.18417500  | 3.67483400  | -0.53591400 |
| O | 6.65752100  | 5.84656900  | -0.79980200 |
| H | 7.56696500  | 5.51380100  | -0.81530400 |
| H | 1.27228600  | 8.41670500  | -0.82682200 |
| H | -3.74670000 | 2.34631300  | 0.20482700  |
| H | -2.11827900 | -1.49637000 | 0.93515000  |

**Cation-Cation-Cl Water**

|   |             |             |             |
|---|-------------|-------------|-------------|
| N | -2.35097000 | -1.24556300 | -0.02855300 |
| H | -1.46280500 | -1.11507800 | -0.52574500 |
| C | -3.15994300 | -0.00048100 | -0.09219500 |
| C | -2.21854200 | 1.17919200  | 0.08594300  |
| H | -3.63801900 | 0.05643000  | -1.07017500 |
| H | -3.92484700 | -0.03473800 | 0.68173000  |
| O | -1.02795900 | 1.03547800  | 0.09334300  |
| H | -2.84519900 | -2.04004200 | -0.44161800 |
| O | -2.77743700 | 2.37376400  | 0.20496600  |
| C | 2.08425400  | 4.61140500  | -0.41382000 |
| C | 3.42218400  | 4.25166200  | -0.45239700 |
| C | 4.38900500  | 5.24101900  | -0.60863400 |
| C | 4.03099700  | 6.58024900  | -0.72583400 |
| C | 2.68494900  | 6.89560900  | -0.68007300 |
| C | 1.69456300  | 5.94148800  | -0.52785800 |
| H | 3.72225600  | 3.21539800  | -0.36308400 |
| H | 4.78606700  | 7.34634800  | -0.84814000 |



|    |             |             |             |   |            |            |             |
|----|-------------|-------------|-------------|---|------------|------------|-------------|
| H  | 0.64603600  | 6.21189800  | -0.49806600 | C | 2.79775400 | 7.00915600 | -0.65272900 |
| Cl | 0.87251900  | 3.38678700  | -0.21945700 | C | 1.80539600 | 6.05213700 | -0.53364500 |
| N  | 2.29079800  | 8.31094400  | -0.78992300 | H | 3.84174600 | 3.32732900 | -0.46114700 |
| H  | 2.61813600  | 8.85701900  | 0.01443100  | H | 4.90162400 | 7.46941000 | -0.80646000 |
| H  | 2.67494300  | 8.74601800  | -1.63525300 | H | 0.75782900 | 6.32714800 | -0.49605400 |
| C  | 5.82198400  | 4.81584100  | -0.64466500 | N | 2.40031500 | 8.43086500 | -0.71492100 |
| O  | 6.18171800  | 3.67283200  | -0.53960300 | H | 2.73557000 | 8.95254500 | 0.10263000  |
| O  | 6.65571400  | 5.84409900  | -0.80538200 | H | 2.77425700 | 8.89101700 | -1.55189100 |
| H  | 7.56492300  | 5.51078700  | -0.82283800 | C | 5.93424300 | 4.92692400 | -0.68978500 |
| H  | 1.27304000  | 8.41780000  | -0.83216000 | O | 6.28618600 | 3.78193900 | -0.61683800 |
| H  | -3.74411800 | 2.34733200  | 0.19812400  | O | 6.76862200 | 5.95959900 | -0.82650200 |
| H  | -2.11644700 | -1.49369700 | 0.93650800  | H | 7.67690300 | 5.62459400 | -0.85800000 |

**Cation-Cation-Br Vacuum SP**

|   |             |             |             |
|---|-------------|-------------|-------------|
| N | -2.33226300 | -1.23475000 | 0.09826600  |
| H | -1.45207400 | -1.11348100 | -0.41891600 |
| C | -3.18602700 | -0.02821500 | -0.08091000 |
| C | -2.26773900 | 1.18718800  | -0.08304100 |
| H | -3.70334200 | -0.10268400 | -1.03789900 |
| H | -3.91714700 | 0.01465500  | 0.72545200  |
| O | -1.07681400 | 1.06023500  | -0.12724500 |
| H | -2.79813800 | -2.08622200 | -0.22550200 |
| O | -2.85108100 | 2.37227200  | -0.05952400 |
| C | 2.19196900  | 4.71724700  | -0.46322100 |
| C | 3.53258600  | 4.36366100  | -0.51441300 |
| C | 4.50068500  | 5.35685600  | -0.63740600 |
| C | 4.14469400  | 6.69998400  | -0.70858300 |

|    |             |             |             |
|----|-------------|-------------|-------------|
| H  | 1.38145000  | 8.53455500  | -0.74310800 |
| H  | -3.81409500 | 2.32291300  | 0.00655200  |
| H  | -2.07660800 | -1.37124500 | 1.08052400  |
| Br | 0.87197000  | 3.37766600  | -0.28965000 |

**Cation-Cation-Br TCM**

|   |             |             |             |
|---|-------------|-------------|-------------|
| N | -2.33226300 | -1.23475000 | 0.09826600  |
| H | -1.45207400 | -1.11348100 | -0.41891600 |
| C | -3.18602700 | -0.02821500 | -0.08091000 |
| C | -2.26773900 | 1.18718800  | -0.08304100 |
| H | -3.70334200 | -0.10268400 | -1.03789900 |
| H | -3.91714700 | 0.01465500  | 0.72545200  |
| O | -1.07681400 | 1.06023500  | -0.12724500 |
| H | -2.79813800 | -2.08622200 | -0.22550200 |
| O | -2.85108100 | 2.37227200  | -0.05952400 |

|                             |             |             |             |                                 |             |             |             |
|-----------------------------|-------------|-------------|-------------|---------------------------------|-------------|-------------|-------------|
| C                           | 2.19196900  | 4.71724700  | -0.46322100 | H                               | -3.93034400 | -0.02877600 | 0.66211500  |
| C                           | 3.53258600  | 4.36366100  | -0.51441300 | O                               | -1.09707000 | 1.13111100  | 0.06765500  |
| C                           | 4.50068500  | 5.35685600  | -0.63740600 | H                               | -2.75773500 | -2.08296100 | -0.17360200 |
| C                           | 4.14469400  | 6.69998400  | -0.70858300 | O                               | -2.90942600 | 2.37753900  | -0.11383800 |
| C                           | 2.79775400  | 7.00915600  | -0.65272900 | C                               | 2.17899100  | 4.72416300  | -0.41283800 |
| C                           | 1.80539600  | 6.05213700  | -0.53364500 | C                               | 3.51479800  | 4.35832400  | -0.48679000 |
| H                           | 3.84174600  | 3.32732900  | -0.46114700 | C                               | 4.48755200  | 5.34336800  | -0.63839400 |
| H                           | 4.90162400  | 7.46941000  | -0.80646000 | C                               | 4.13969400  | 6.68829900  | -0.71442000 |
| H                           | 0.75782900  | 6.32714800  | -0.49605400 | C                               | 2.79681800  | 7.01025000  | -0.63541800 |
| N                           | 2.40031500  | 8.43086500  | -0.71492100 | C                               | 1.80072800  | 6.06091100  | -0.48879200 |
| H                           | 2.73557000  | 8.95254500  | 0.10263000  | H                               | 3.81533300  | 3.31978800  | -0.42938700 |
| H                           | 2.77425700  | 8.89101700  | -1.55189100 | H                               | 4.89906600  | 7.45146400  | -0.83383800 |
| C                           | 5.93424300  | 4.92692400  | -0.68978500 | H                               | 0.75658500  | 6.34480300  | -0.43417900 |
| O                           | 6.28618600  | 3.78193900  | -0.61683800 | N                               | 2.40944400  | 8.43214700  | -0.70274600 |
| O                           | 6.76862200  | 5.95959900  | -0.82650200 | H                               | 2.76662000  | 8.95895500  | 0.10176700  |
| H                           | 7.67690300  | 5.62459400  | -0.85800000 | H                               | 2.76751200  | 8.88247000  | -1.55179000 |
| H                           | 1.38145000  | 8.53455500  | -0.74310800 | C                               | 5.91588100  | 4.90459200  | -0.71700900 |
| H                           | -3.81409500 | 2.32291300  | 0.00655200  | O                               | 6.26423400  | 3.75651200  | -0.64995200 |
| H                           | -2.07660800 | -1.37124500 | 1.08052400  | O                               | 6.75560600  | 5.92998200  | -0.86977500 |
| Br                          | 0.87197000  | 3.37766600  | -0.28965000 | H                               | 7.66083700  | 5.58863000  | -0.91651600 |
| <b>Cation-Cation-Br DCE</b> |             |             |             | H                               | 1.39131400  | 8.54473000  | -0.70812100 |
| N                           | -2.28358900 | -1.21558700 | 0.09042600  | H                               | -3.86979800 | 2.29566700  | -0.19402700 |
| H                           | -1.42723500 | -1.12306200 | -0.46710400 | H                               | -1.98779600 | -1.30211600 | 1.06683200  |
| C                           | -3.16025200 | -0.03128400 | -0.10820600 | Br                              | 0.85090200  | 3.39676600  | -0.20124600 |
| C                           | -2.28897800 | 1.21187000  | -0.03643600 | <b>Cation-Cation-Br Acetone</b> |             |             |             |
| H                           | -3.63122000 | -0.10525900 | -1.08833600 | N                               | -2.34539500 | -1.23135600 | -0.03979400 |

|   |             |             |             |                              |             |             |             |
|---|-------------|-------------|-------------|------------------------------|-------------|-------------|-------------|
| H | -1.45538000 | -1.08587600 | -0.53032100 | Br                           | 0.88299900  | 3.36348500  | -0.19009000 |
| C | -3.16589900 | 0.00709600  | -0.09499700 |                              |             |             |             |
| C | -2.23293900 | 1.19471400  | 0.07735000  | <b>Cation-Cation-Br DMSO</b> |             |             |             |
| H | -3.65211400 | 0.06187400  | -1.06930900 | N                            | -2.34219100 | -1.23238900 | -0.03810500 |
| H | -3.92452700 | -0.03542100 | 0.68468100  | H                            | -1.45408500 | -1.09242500 | -0.53308300 |
| O | -1.04077900 | 1.05908500  | 0.07089600  | C                            | -3.16156000 | 0.00610200  | -0.09790100 |
| H | -2.82885400 | -2.02656400 | -0.46415100 | C                            | -2.23033100 | 1.19393600  | 0.07716000  |
| O | -2.79853800 | 2.38372400  | 0.20499100  | H                            | -3.64381900 | 0.05999800  | -1.07408500 |
| C | 2.19467200  | 4.70579000  | -0.41455400 | H                            | -3.92335400 | -0.03492200 | 0.67877400  |
| C | 3.53618700  | 4.35702500  | -0.45517800 | O                            | -1.03770400 | 1.06031000  | 0.07834800  |
| C | 4.49684900  | 5.35221600  | -0.61767400 | H                            | -2.82885100 | -2.02918600 | -0.45571700 |
| C | 4.13064300  | 6.68874400  | -0.73899200 | O                            | -2.79743500 | 2.38309100  | 0.19935100  |
| C | 2.78211800  | 6.99429700  | -0.69151600 | C                            | 2.19049800  | 4.70943000  | -0.41020600 |
| C | 1.79806200  | 6.03395600  | -0.53379700 | C                            | 3.53096500  | 4.35733500  | -0.45322600 |
| H | 3.84978600  | 3.32509700  | -0.36228500 | C                            | 4.49331100  | 5.35056300  | -0.61790700 |
| H | 4.88128000  | 7.45906600  | -0.86497400 | C                            | 4.12922800  | 6.68761500  | -0.73927100 |
| H | 0.74903200  | 6.30301700  | -0.50316600 | C                            | 2.78164000  | 6.99664300  | -0.68941400 |
| N | 2.37599000  | 8.40654900  | -0.80985600 | C                            | 1.79604100  | 6.03825800  | -0.52892000 |
| H | 2.76166900  | 8.97497000  | -0.04825200 | H                            | 3.84193900  | 3.32460300  | -0.36072300 |
| H | 2.69248800  | 8.81827400  | -1.69406500 | H                            | 4.88070700  | 7.45649200  | -0.86742300 |
| C | 5.93263600  | 4.93500000  | -0.65424600 | H                            | 0.74771100  | 6.30950400  | -0.49620300 |
| O | 6.29864000  | 3.79493600  | -0.54549000 | N                            | 2.37946100  | 8.40940000  | -0.80779000 |
| O | 6.75995200  | 5.96815800  | -0.82004900 | H                            | 2.76363000  | 8.97615200  | -0.04414900 |
| H | 7.67097700  | 5.63980300  | -0.83725600 | H                            | 2.70078300  | 8.82126000  | -1.69017500 |
| H | 1.35749400  | 8.51065900  | -0.77721400 | C                            | 5.92809100  | 4.93147500  | -0.65713000 |
| H | -3.76498300 | 2.35202400  | 0.21130300  | O                            | 6.29338400  | 3.79065300  | -0.54898700 |
| H | -2.11359300 | -1.48704400 | 0.92403800  | O                            | 6.75675500  | 5.96305300  | -0.82453400 |

|    |             |             |             |
|----|-------------|-------------|-------------|
| H  | 7.66730200  | 5.63348600  | -0.84347400 |
| H  | 1.36121700  | 8.51644500  | -0.77936300 |
| H  | -3.76394900 | 2.35038700  | 0.19803900  |
| H  | -2.10755400 | -1.48297100 | 0.92631000  |
| Br | 0.87664200  | 3.36900000  | -0.18415900 |

**Cation-Cation-Br Water**

|   |             |             |             |
|---|-------------|-------------|-------------|
| N | -2.34142400 | -1.23148000 | -0.03664800 |
| H | -1.45434500 | -1.09436100 | -0.53406100 |
| C | -3.15974200 | 0.00751400  | -0.09846800 |
| C | -2.22825300 | 1.19480600  | 0.07739900  |
| H | -3.63994300 | 0.06133100  | -1.07563400 |
| H | -3.92297300 | -0.03247800 | 0.67682900  |
| O | -1.03560300 | 1.06104400  | 0.08081900  |
| H | -2.83006500 | -2.02885900 | -0.45080400 |
| O | -2.79526900 | 2.38439000  | 0.19765600  |
| C | 2.18965500  | 4.70891900  | -0.40895800 |
| C | 3.52997600  | 4.35654300  | -0.45303300 |
| C | 4.49224300  | 5.34969900  | -0.61853500 |
| C | 4.12801800  | 6.68669400  | -0.73977400 |
| C | 2.78056500  | 6.99607700  | -0.68884100 |
| C | 1.79504500  | 6.03773400  | -0.52729000 |
| H | 3.84075600  | 3.32373400  | -0.36081300 |
| H | 4.87933600  | 7.45549800  | -0.86871800 |
| H | 0.74678200  | 6.30902900  | -0.49362800 |
| N | 2.37889300  | 8.40879600  | -0.80716100 |
| H | 2.76243300  | 8.97521500  | -0.04294200 |

|    |             |             |             |
|----|-------------|-------------|-------------|
| H  | 2.70142600  | 8.82087600  | -1.68900300 |
| C  | 5.92696900  | 4.93088600  | -0.65903900 |
| O  | 6.29264400  | 3.78991600  | -0.55196500 |
| O  | 6.75543200  | 5.96250000  | -0.82622100 |
| H  | 7.66604300  | 5.63316000  | -0.84613100 |
| H  | 1.36068800  | 8.51629700  | -0.77995300 |
| H  | -3.76180400 | 2.35128000  | 0.19533900  |
| H  | -2.10514400 | -1.47949900 | 0.92799900  |
| Br | 0.87613600  | 3.36804000  | -0.18238700 |

**Cation-Cation-I Vacuum SP**

|   |             |             |             |
|---|-------------|-------------|-------------|
| N | -2.31895300 | -1.24431400 | 0.05366500  |
| H | -1.60041200 | -1.20385600 | -0.67743600 |
| C | -3.21805500 | -0.06207000 | -0.02832800 |
| C | -2.34907500 | 1.18542500  | -0.03936800 |
| H | -3.80214400 | -0.12935300 | -0.94611700 |
| H | -3.88986100 | -0.07002000 | 0.82943800  |
| O | -1.15224100 | 1.10519400  | -0.03316300 |
| H | -2.83909900 | -2.12021400 | -0.04787400 |
| O | -2.97792100 | 2.34606300  | -0.06946400 |
| C | 2.33820500  | 4.86885500  | -0.48067600 |
| C | 3.68179600  | 4.52177500  | -0.51785400 |
| C | 4.65207800  | 5.51354600  | -0.64512700 |
| C | 4.29620000  | 6.85537800  | -0.73364800 |
| C | 2.94877700  | 7.16290600  | -0.69001600 |
| C | 1.95700100  | 6.20472300  | -0.56893800 |
| H | 3.99966400  | 3.48886300  | -0.44947700 |

|   |             |             |             |   |            |            |             |
|---|-------------|-------------|-------------|---|------------|------------|-------------|
| H | 5.05301400  | 7.62488500  | -0.83277300 | C | 4.29620000 | 6.85537800 | -0.73364800 |
| H | 0.91116100  | 6.48859000  | -0.54281800 | C | 2.94877700 | 7.16290600 | -0.69001600 |
| N | 2.55042500  | 8.58399200  | -0.76615100 | C | 1.95700100 | 6.20472300 | -0.56893800 |
| H | 2.88289300  | 9.11307100  | 0.04768500  | H | 3.99966400 | 3.48886300 | -0.44947700 |
| H | 2.92641200  | 9.03715400  | -1.60577800 | H | 5.05301400 | 7.62488500 | -0.83277300 |
| C | 6.08594200  | 5.08436400  | -0.68034700 | H | 0.91116100 | 6.48859000 | -0.54281800 |
| O | 6.43938400  | 3.94089200  | -0.59005900 | N | 2.55042500 | 8.58399200 | -0.76615100 |
| O | 6.92135100  | 6.11592400  | -0.82308200 | H | 2.88289300 | 9.11307100 | 0.04768500  |
| H | 7.82974600  | 5.78047100  | -0.84215900 | H | 2.92641200 | 9.03715400 | -1.60577800 |
| H | 1.53153200  | 8.68626600  | -0.79799000 | C | 6.08594200 | 5.08436400 | -0.68034700 |
| H | -3.94108000 | 2.26047200  | -0.07363700 | O | 6.43938400 | 3.94089200 | -0.59005900 |
| H | -1.81993900 | -1.27294000 | 0.94821400  | O | 6.92135100 | 6.11592400 | -0.82308200 |
| I | 0.86059200  | 3.36829100  | -0.27652800 | H | 7.82974600 | 5.78047100 | -0.84215900 |

**Cation-Cation-I TCM**

|   |             |             |             |
|---|-------------|-------------|-------------|
| N | -2.31895300 | -1.24431400 | 0.05366500  |
| H | -1.60041200 | -1.20385600 | -0.67743600 |
| C | -3.21805500 | -0.06207000 | -0.02832800 |
| C | -2.34907500 | 1.18542500  | -0.03936800 |
| H | -3.80214400 | -0.12935300 | -0.94611700 |
| H | -3.88986100 | -0.07002000 | 0.82943800  |
| O | -1.15224100 | 1.10519400  | -0.03316300 |
| H | -2.83909900 | -2.12021400 | -0.04787400 |
| O | -2.97792100 | 2.34606300  | -0.06946400 |
| C | 2.33820500  | 4.86885500  | -0.48067600 |
| C | 3.68179600  | 4.52177500  | -0.51785400 |
| C | 4.65207800  | 5.51354600  | -0.64512700 |

|   |             |             |             |
|---|-------------|-------------|-------------|
| H | 5.05301400  | 7.62488500  | -0.83277300 |
| H | 0.91116100  | 6.48859000  | -0.54281800 |
| N | 2.55042500  | 8.58399200  | -0.76615100 |
| H | 2.88289300  | 9.11307100  | 0.04768500  |
| H | 2.92641200  | 9.03715400  | -1.60577800 |
| C | 6.08594200  | 5.08436400  | -0.68034700 |
| O | 6.43938400  | 3.94089200  | -0.59005900 |
| O | 6.92135100  | 6.11592400  | -0.82308200 |
| H | 7.82974600  | 5.78047100  | -0.84215900 |
| H | 1.53153200  | 8.68626600  | -0.79799000 |
| H | -3.94108000 | 2.26047200  | -0.07363700 |
| H | -1.81993900 | -1.27294000 | 0.94821400  |
| I | 0.86059200  | 3.36829100  | -0.27652800 |

**Cation-Cation-I DCE**

|   |             |             |             |
|---|-------------|-------------|-------------|
| N | -2.37389300 | -1.25282800 | -0.04331600 |
| H | -1.48768100 | -1.09647000 | -0.53823400 |
| C | -3.20500200 | -0.02015700 | -0.08570800 |
| C | -2.27883800 | 1.17480500  | 0.07403700  |
| H | -3.70521100 | 0.03190700  | -1.05335800 |
| H | -3.95190200 | -0.06956200 | 0.70481100  |
| O | -1.08524800 | 1.04511500  | 0.04845400  |
| H | -2.85331700 | -2.04976800 | -0.46934100 |





O 6.91023700 6.11063200 -0.83536000  
H 7.81833400 5.77533600 -0.86599200  
H 1.53283600 8.69310600 -0.77308800  
H -3.91986900 2.27085100 -0.07719700  
H -1.82468900 -1.27140500 0.94769900  
I 0.85077300 3.36895800 -0.25598800

**Neutral-Cation-Cl Vacuum SP**

N -2.49975200 -1.23034500 0.10174600  
H -1.61291100 -1.29478400 -0.41062700  
C -3.14971300 0.08164900 -0.16282000  
C -2.08640700 1.15958500 0.00726600  
H -3.53163800 0.08131700 -1.18368800  
H -3.97550100 0.21448300 0.53500600  
O -0.94320600 0.86821100 0.20794800  
H -3.09953300 -2.01273500 -0.17096700  
O -2.49228200 2.41421400 -0.09278700  
C 2.16795000 4.59996600 -0.34459700  
C 3.49880000 4.23113900 -0.44826500  
C 4.43973700 5.24673300 -0.61290400  
C 4.06467200 6.58318500 -0.67082700  
C 2.71379700 6.93702800 -0.56392500  
C 1.76028100 5.92415200 -0.39871000  
H 3.80837800 3.19601500 -0.40519900  
H 4.81618300 7.35242200 -0.79722200  
H 0.70916200 6.17219800 -0.30997200  
Cl 0.95994100 3.35535900 -0.13745900

N 2.33074200 8.26825300 -0.56147900  
H 2.97753500 8.91424000 -0.98953900  
H 1.37171100 8.45549500 -0.81377900  
C 5.87082900 4.84187000 -0.72731800  
O 6.25924700 3.70249800 -0.68581600  
O 6.69972500 5.88314900 -0.88426500  
H 7.60248100 5.54105500 -0.94920100  
H -3.44089800 2.49939500 -0.25510900  
H -2.26706500 -1.33699400 1.09342800

**Neutral-Cation-Cl TCM**

N -2.49975200 -1.23034500 0.10174600  
H -1.61291100 -1.29478400 -0.41062700  
C -3.14971300 0.08164900 -0.16282000  
C -2.08640700 1.15958500 0.00726600  
H -3.53163800 0.08131700 -1.18368800  
H -3.97550100 0.21448300 0.53500600  
O -0.94320600 0.86821100 0.20794800  
H -3.09953300 -2.01273500 -0.17096700  
O -2.49228200 2.41421400 -0.09278700  
C 2.16795000 4.59996600 -0.34459700  
C 3.49880000 4.23113900 -0.44826500  
C 4.43973700 5.24673300 -0.61290400  
C 4.06467200 6.58318500 -0.67082700  
C 2.71379700 6.93702800 -0.56392500  
C 1.76028100 5.92415200 -0.39871000  
H 3.80837800 3.19601500 -0.40519900



|    |             |             |             |    |            |            |             |
|----|-------------|-------------|-------------|----|------------|------------|-------------|
| H  | 4.81618300  | 7.35242200  | -0.79722200 | C  | 2.70813400 | 6.92792700 | -0.56034200 |
| H  | 0.70916200  | 6.17219800  | -0.30997200 | C  | 1.76298000 | 5.90808200 | -0.38790700 |
| Cl | 0.95994100  | 3.35535900  | -0.13745900 | H  | 3.83068700 | 3.19479100 | -0.39768300 |
| N  | 2.33074200  | 8.26825300  | -0.56147900 | H  | 4.80580900 | 7.35841500 | -0.80635700 |
| H  | 2.97753500  | 8.91424000  | -0.98953900 | H  | 0.71050700 | 6.14887000 | -0.29574500 |
| H  | 1.37171100  | 8.45549500  | -0.81377900 | Cl | 0.98292000 | 3.33391700 | -0.11809900 |
| C  | 5.87082900  | 4.84187000  | -0.72731800 | N  | 2.31496400 | 8.25602900 | -0.55827000 |
| O  | 6.25924700  | 3.70249800  | -0.68581600 | H  | 2.95250200 | 8.90425600 | -0.99728000 |
| O  | 6.69972500  | 5.88314900  | -0.88426500 | H  | 1.35265900 | 8.43330300 | -0.80672600 |
| H  | 7.60248100  | 5.54105500  | -0.94920100 | C  | 5.88056900 | 4.85682300 | -0.73352500 |
| H  | -3.44089800 | 2.49939500  | -0.25510900 | O  | 6.27821600 | 3.71985800 | -0.69021300 |
| H  | -2.26706500 | -1.33699400 | 1.09342800  | O  | 6.69993000 | 5.90330300 | -0.89699500 |

**Neutral-Cation-Cl DCE**

|   |             |             |             |
|---|-------------|-------------|-------------|
| N | -2.52448700 | -1.22920900 | 0.10504200  |
| H | -1.63810900 | -1.31942400 | -0.40292300 |
| C | -3.14634400 | 0.09242400  | -0.17037900 |
| C | -2.07468400 | 1.15684700  | 0.01121300  |
| H | -3.51371600 | 0.09655500  | -1.19639900 |
| H | -3.98040900 | 0.23982700  | 0.51423300  |
| O | -0.93474600 | 0.86101800  | 0.22962200  |
| H | -3.14035400 | -1.99850700 | -0.16895800 |
| O | -2.46698000 | 2.41622200  | -0.09943600 |
| C | 2.18093200  | 4.58717200  | -0.33266500 |
| C | 3.51419300  | 4.22779500  | -0.44168800 |
| C | 4.44677500  | 5.25004600  | -0.61362500 |
| C | 4.06126900  | 6.58362000  | -0.67333800 |

|   |             |             |             |
|---|-------------|-------------|-------------|
| H | 7.60610700  | 5.57054100  | -0.96619000 |
| H | -3.41291200 | 2.50738900  | -0.27533800 |
| H | -2.30414900 | -1.33914400 | 1.09889100  |

**Neutral-Cation-Cl Acetone**

|   |             |             |             |
|---|-------------|-------------|-------------|
| N | -2.53080700 | -1.22708900 | 0.10664500  |
| H | -1.64391500 | -1.32482800 | -0.39845000 |
| C | -3.14538900 | 0.09612500  | -0.17418400 |
| C | -2.07468100 | 1.15866100  | 0.01562200  |
| H | -3.50364900 | 0.10107200  | -1.20341000 |
| H | -3.98557700 | 0.24620900  | 0.50216200  |
| O | -0.93525000 | 0.86502700  | 0.24261200  |
| H | -3.14995800 | -1.99306500 | -0.16907700 |
| O | -2.46524200 | 2.41893800  | -0.09755000 |
| C | 2.18689000  | 4.58077700  | -0.33056100 |

|    |             |             |             |    |             |             |             |
|----|-------------|-------------|-------------|----|-------------|-------------|-------------|
| C  | 3.52123100  | 4.22552000  | -0.44122800 | H  | -3.15157600 | -1.99251400 | -0.16474200 |
| C  | 4.45031300  | 5.25082700  | -0.61445700 | O  | -2.46850800 | 2.41956600  | -0.09829400 |
| C  | 4.06032400  | 6.58319800  | -0.67386000 | C  | 2.18818300  | 4.58019100  | -0.32901800 |
| C  | 2.70611200  | 6.92329600  | -0.55897400 | C  | 3.52251100  | 4.22521000  | -0.44131700 |
| C  | 1.76446400  | 5.90023900  | -0.38518100 | C  | 4.45115600  | 5.25086300  | -0.61533400 |
| H  | 3.84060600  | 3.19337600  | -0.39775100 | C  | 4.06068200  | 6.58318500  | -0.67393900 |
| H  | 4.80190900  | 7.36052100  | -0.80846200 | C  | 2.70644900  | 6.92294000  | -0.55739500 |
| H  | 0.71136800  | 6.13784500  | -0.29225700 | C  | 1.76527100  | 5.89951500  | -0.38274100 |
| Cl | 0.99304300  | 3.32344800  | -0.11498700 | H  | 3.84192500  | 3.19303900  | -0.39862700 |
| N  | 2.30850300  | 8.24990100  | -0.55609500 | H  | 4.80170500  | 7.36087600  | -0.80942800 |
| H  | 2.94230900  | 8.89958200  | -0.99861500 | H  | 0.71224100  | 6.13695800  | -0.28892500 |
| H  | 1.34494400  | 8.42308700  | -0.80329400 | Cl | 0.99466300  | 3.32258800  | -0.11253000 |
| C  | 5.88535900  | 4.86274700  | -0.73601800 | N  | 2.30839000  | 8.24937600  | -0.55348900 |
| O  | 6.28678700  | 3.72667600  | -0.69293700 | H  | 2.94067500  | 8.89874900  | -0.99881300 |
| O  | 6.70070500  | 5.91148700  | -0.90033600 | H  | 1.34423900  | 8.42158700  | -0.79955100 |
| H  | 7.60841100  | 5.58295400  | -0.97134300 | C  | 5.88625900  | 4.86348800  | -0.73853300 |
| H  | -3.40992700 | 2.51013100  | -0.28076000 | O  | 6.28809100  | 3.72730600  | -0.69588900 |
| H  | -2.31661800 | -1.33791300 | 1.10166700  | O  | 6.70087700  | 5.91231100  | -0.90318900 |

**Neutral-Cation-Cl DMSO**

|   |             |             |             |
|---|-------------|-------------|-------------|
| N | -2.53129200 | -1.22671600 | 0.10884400  |
| H | -1.64473000 | -1.32898600 | -0.39555900 |
| C | -3.14404200 | 0.09568600  | -0.17803600 |
| C | -2.07660800 | 1.15967400  | 0.01811600  |
| H | -3.49434700 | 0.09921000  | -1.21002700 |
| H | -3.98991400 | 0.24601700  | 0.49105600  |
| O | -0.93736900 | 0.86981500  | 0.25250600  |

|   |             |             |             |
|---|-------------|-------------|-------------|
| H | -3.41273000 | 2.50856900  | -0.28530900 |
| H | -2.31888300 | -1.33461600 | 1.10456100  |

**Neutral-Cation-Cl Water**

|   |             |             |             |
|---|-------------|-------------|-------------|
| N | -2.53168900 | -1.22681400 | 0.10967100  |
| H | -1.64517500 | -1.33035700 | -0.39444700 |
| C | -3.14376500 | 0.09548200  | -0.17864400 |
| C | -2.07673200 | 1.15955300  | 0.01787500  |

|                                    |             |             |             |    |             |             |             |
|------------------------------------|-------------|-------------|-------------|----|-------------|-------------|-------------|
| H                                  | -3.49290000 | 0.09844500  | -1.21103300 | H  | -1.47078000 | -1.05410100 | -0.49243100 |
| H                                  | -3.99048700 | 0.24636100  | 0.48922300  | C  | -3.19839900 | 0.00998200  | -0.07366100 |
| O                                  | -0.93730000 | 0.87059200  | 0.25308300  | C  | -2.25590200 | 1.19374600  | 0.11031000  |
| H                                  | -3.15234400 | -1.99237100 | -0.16367600 | H  | -3.68353500 | 0.07059100  | -1.04845700 |
| O                                  | -2.46877000 | 2.41945800  | -0.09895900 | H  | -3.95609000 | -0.04113500 | 0.70646100  |
| C                                  | 2.18842000  | 4.58024000  | -0.32872500 | O  | -1.06823900 | 1.03855700  | 0.09956700  |
| C                                  | 3.52274900  | 4.22524700  | -0.44128900 | H  | -2.83586500 | -2.01849200 | -0.48002400 |
| C                                  | 4.45135500  | 5.25094800  | -0.61538700 | O  | -2.81181200 | 2.38375600  | 0.25403800  |
| C                                  | 4.06082900  | 6.58328700  | -0.67382900 | C  | 2.26199800  | 4.75457200  | -0.44218600 |
| C                                  | 2.70659100  | 6.92303900  | -0.55695500 | C  | 3.59003600  | 4.36150700  | -0.47830200 |
| C                                  | 1.76545600  | 5.89954200  | -0.38219600 | C  | 4.55371500  | 5.35363600  | -0.65859700 |
| H                                  | 3.84207000  | 3.19303300  | -0.39883400 | C  | 4.20322900  | 6.69061900  | -0.79905600 |
| H                                  | 4.80174500  | 7.36103600  | -0.80954500 | C  | 2.85579000  | 7.06947300  | -0.75905700 |
| H                                  | 0.71244800  | 6.13702000  | -0.28832300 | C  | 1.87920300  | 6.08051600  | -0.57957500 |
| Cl                                 | 0.99487200  | 3.32258700  | -0.11241900 | H  | 3.88544600  | 3.32718500  | -0.37032000 |
| N                                  | 2.30846200  | 8.24939200  | -0.55280500 | H  | 4.97106600  | 7.44096800  | -0.94138000 |
| H                                  | 2.94047600  | 8.89873400  | -0.99860800 | H  | 0.83086500  | 6.35396400  | -0.55158500 |
| H                                  | 1.34418500  | 8.42141900  | -0.79865700 | N  | 2.48826100  | 8.39112800  | -0.95401800 |
| C                                  | 5.88646400  | 4.86370100  | -0.73890200 | H  | 1.58515500  | 8.65786000  | -0.59096100 |
| O                                  | 6.28834100  | 3.72744500  | -0.69647700 | H  | 3.20135400  | 9.07853500  | -0.75898000 |
| O                                  | 6.70091400  | 5.91248900  | -0.90379500 | C  | 5.98126400  | 4.92231000  | -0.69237200 |
| H                                  | 7.60908200  | 5.58533900  | -0.97657100 | O  | 6.34857500  | 3.78109200  | -0.57718300 |
| H                                  | -3.41295500 | 2.50821400  | -0.28644500 | O  | 6.83326400  | 5.94218900  | -0.86553900 |
| H                                  | -2.32007600 | -1.33430900 | 1.10558800  | H  | 7.73177800  | 5.58354900  | -0.87816800 |
|                                    |             |             |             | H  | -3.77797500 | 2.36292500  | 0.25746300  |
|                                    |             |             |             | H  | -2.15500700 | -1.49852700 | 0.93601700  |
| <b>Neutral-Cation-Br Vacuum SP</b> |             |             |             | Br | 0.91815500  | 3.43139700  | -0.19519300 |
| N                                  | -2.37147100 | -1.22752700 | -0.02768900 |    |             |             |             |

**Neutral-Cation-Br TCM**

|   |             |             |             |
|---|-------------|-------------|-------------|
| N | -2.37147100 | -1.22752700 | -0.02768900 |
| H | -1.47078000 | -1.05410100 | -0.49243100 |
| C | -3.19839900 | 0.00998200  | -0.07366100 |
| C | -2.25590200 | 1.19374600  | 0.11031000  |
| H | -3.68353500 | 0.07059100  | -1.04845700 |
| H | -3.95609000 | -0.04113500 | 0.70646100  |
| O | -1.06823900 | 1.03855700  | 0.09956700  |
| H | -2.83586500 | -2.01849200 | -0.48002400 |
| O | -2.81181200 | 2.38375600  | 0.25403800  |
| C | 2.26199800  | 4.75457200  | -0.44218600 |
| C | 3.59003600  | 4.36150700  | -0.47830200 |
| C | 4.55371500  | 5.35363600  | -0.65859700 |
| C | 4.20322900  | 6.69061900  | -0.79905600 |
| C | 2.85579000  | 7.06947300  | -0.75905700 |
| C | 1.87920300  | 6.08051600  | -0.57957500 |
| H | 3.88544600  | 3.32718500  | -0.37032000 |
| H | 4.97106600  | 7.44096800  | -0.94138000 |
| H | 0.83086500  | 6.35396400  | -0.55158500 |
| N | 2.48826100  | 8.39112800  | -0.95401800 |
| H | 1.58515500  | 8.65786000  | -0.59096100 |
| H | 3.20135400  | 9.07853500  | -0.75898000 |
| C | 5.98126400  | 4.92231000  | -0.69237200 |
| O | 6.34857500  | 3.78109200  | -0.57718300 |
| O | 6.83326400  | 5.94218900  | -0.86553900 |
| H | 7.73177800  | 5.58354900  | -0.87816800 |

|    |             |             |             |
|----|-------------|-------------|-------------|
| H  | -3.77797500 | 2.36292500  | 0.25746300  |
| H  | -2.15500700 | -1.49852700 | 0.93601700  |
| Br | 0.91815500  | 3.43139700  | -0.19519300 |

**Neutral-Cation-Br DCE**

|   |             |             |             |
|---|-------------|-------------|-------------|
| N | -2.32593300 | -1.17764100 | -0.20078800 |
| H | -1.46400100 | -1.01565600 | -0.73233100 |
| C | -3.15221900 | 0.05768000  | -0.15853200 |
| C | -2.24269300 | 1.20982400  | 0.23872800  |
| H | -3.57833800 | 0.22744000  | -1.14744300 |
| H | -3.95534900 | -0.08270600 | 0.56334000  |
| O | -1.06554100 | 1.04654200  | 0.39357800  |
| H | -2.83296500 | -1.95654100 | -0.62862100 |
| O | -2.81491100 | 2.39333300  | 0.39031900  |
| C | 2.25632500  | 4.73678400  | -0.30322300 |
| C | 3.58638000  | 4.35029800  | -0.34472400 |
| C | 4.54173700  | 5.34301700  | -0.56257600 |
| C | 4.18148900  | 6.67405600  | -0.73360400 |
| C | 2.83185000  | 7.04609100  | -0.69084800 |
| C | 1.86396400  | 6.05647200  | -0.47006900 |
| H | 3.88814400  | 3.32037600  | -0.21445900 |
| H | 4.94336800  | 7.42545800  | -0.89939200 |
| H | 0.81511500  | 6.32585200  | -0.43038300 |
| N | 2.46108000  | 8.37573500  | -0.80468700 |
| H | 3.12272100  | 8.97904300  | -1.27117400 |
| H | 1.51003200  | 8.54664600  | -1.09722800 |
| C | 5.97143200  | 4.91993500  | -0.60588800 |

O 6.34680700 3.78231300 -0.47375300  
O 6.81461300 5.94023300 -0.80871700  
H 7.71635400 5.58916200 -0.82386800  
H -3.76924400 2.38005300 0.23647400  
H -2.03886400 -1.46587400 0.73876500  
Br 0.92272500 3.41235200 -0.00977600

**Neutral-Cation-Br Acetone**

N -2.37720900 -1.22587700 -0.02434700  
H -1.48926300 -1.08318300 -0.51950500  
C -3.18964400 0.01855900 -0.06991000  
C -2.24551500 1.19766500 0.10404900  
H -3.67975100 0.08123100 -1.04175900  
H -3.94430700 -0.02228600 0.71368600  
O -1.05536400 1.05060200 0.09416500  
H -2.86819400 -2.01638700 -0.44865300  
O -2.80139600 2.39095900 0.23850800  
C 2.26345600 4.74633200 -0.44589600  
C 3.59305400 4.35694000 -0.48142800  
C 4.55448400 5.35234300 -0.65745100  
C 4.20026300 6.68892900 -0.79500700  
C 2.85133200 7.06423400 -0.75700300  
C 1.87723000 6.07161200 -0.58048000  
H 3.88955000 3.32261100 -0.37613100  
H 4.96538200 7.44276200 -0.93269000  
H 0.82834200 6.34266700 -0.55169400  
N 2.48039000 8.38448900 -0.95188100

H 1.57468100 8.64678400 -0.59084100  
H 3.18984200 9.07368100 -0.74823200  
C 5.98365000 4.92682900 -0.69083600  
O 6.35485000 3.78568500 -0.57466400  
O 6.83129600 5.94810200 -0.86486400  
H 7.73282300 5.59604600 -0.87729300  
H -3.76798000 2.36621500 0.24624300  
H -2.14058500 -1.48613800 0.93710900  
Br 0.92266500 3.41886900 -0.20407200

**Neutral-Cation-Br DMSO**

N -2.37639700 -1.22817400 -0.02880200  
H -1.66695800 -1.20977400 -0.76835000  
C -3.20120000 0.00743000 -0.05885500  
C -2.26126400 1.20078200 -0.07138200  
H -3.81618400 -0.00448900 -0.95812000  
H -3.84698600 0.01925300 0.81802300  
O -1.07104300 1.05948200 -0.10842600  
H -2.95178400 -2.06508600 -0.15442600  
O -2.82292400 2.39981000 -0.04866400  
C 2.27519300 4.74227700 -0.40617000  
C 3.60649800 4.35825800 -0.43964400  
C 4.56651100 5.36220600 -0.56854200  
C 4.20971200 6.70216200 -0.66006500  
C 2.85911100 7.07224800 -0.62296500  
C 1.88661600 6.07074300 -0.49379900  
H 3.90481600 3.32130400 -0.37082200

|    |             |             |             |   |            |            |             |
|----|-------------|-------------|-------------|---|------------|------------|-------------|
| H  | 4.97413500  | 7.46243100  | -0.76089800 | C | 2.85940000 | 7.07257600 | -0.62283300 |
| H  | 0.83695500  | 6.33796700  | -0.46290500 | C | 1.88675200 | 6.07127600 | -0.49302800 |
| N  | 2.49109300  | 8.40701500  | -0.65186100 | H | 3.90439500 | 3.32146000 | -0.37001300 |
| H  | 3.16215400  | 9.03880300  | -1.06474200 | H | 4.97440500 | 7.46239600 | -0.76170700 |
| H  | 1.54655800  | 8.59859900  | -0.95338600 | H | 0.83718000 | 6.33879600 | -0.46201100 |
| C  | 5.99732100  | 4.94260900  | -0.60533900 | N | 2.49152600 | 8.40739400 | -0.65191500 |
| O  | 6.37134000  | 3.79878200  | -0.52804200 | H | 3.16223500 | 9.03867000 | -1.06622700 |
| O  | 6.84296900  | 5.97177700  | -0.73406100 | H | 1.54679900 | 8.59864200 | -0.95321200 |
| H  | 7.74599600  | 5.62359300  | -0.75145000 | C | 5.99727800 | 4.94241800 | -0.60558100 |
| H  | -3.78900300 | 2.36885300  | -0.02083300 | O | 6.37106700 | 3.79842400 | -0.52830900 |
| H  | -1.87364800 | -1.32192500 | 0.85842200  | O | 6.84297600 | 5.97132600 | -0.73470000 |
| Br | 0.93449200  | 3.40334100  | -0.23477600 | H | 7.74607100 | 5.62326000 | -0.75257100 |

**Neutral-Cation-Br Water**

|   |             |             |             |
|---|-------------|-------------|-------------|
| N | -2.37616100 | -1.22845000 | -0.02904400 |
| H | -1.66588100 | -1.21009700 | -0.76768000 |
| C | -3.20064700 | 0.00715500  | -0.05896200 |
| C | -2.26150300 | 1.20085100  | -0.07065900 |
| H | -3.81513200 | -0.00438300 | -0.95854100 |
| H | -3.84696900 | 0.01847400  | 0.81746900  |
| O | -1.07092300 | 1.06107500  | -0.10665800 |
| H | -2.95192800 | -2.06482000 | -0.15637300 |
| O | -2.82395700 | 2.39965600  | -0.04876800 |
| C | 2.27509800  | 4.74275100  | -0.40519700 |
| C | 3.60635000  | 4.35849100  | -0.43895800 |
| C | 4.56654900  | 5.36222300  | -0.56842800 |
| C | 4.20995300  | 6.70223800  | -0.66026300 |

|    |             |             |             |
|----|-------------|-------------|-------------|
| H  | 3.90439500  | 3.32146000  | -0.37001300 |
| H  | 4.97440500  | 7.46239600  | -0.76170700 |
| H  | 0.83718000  | 6.33879600  | -0.46201100 |
| N  | 2.49152600  | 8.40739400  | -0.65191500 |
| H  | 3.16223500  | 9.03867000  | -1.06622700 |
| H  | 1.54679900  | 8.59864200  | -0.95321200 |
| C  | 5.99727800  | 4.94241800  | -0.60558100 |
| O  | 6.37106700  | 3.79842400  | -0.52830900 |
| O  | 6.84297600  | 5.97132600  | -0.73470000 |
| H  | 7.74607100  | 5.62326000  | -0.75257100 |
| H  | -3.79012200 | 2.36830100  | -0.02198800 |
| H  | -1.87497000 | -1.32381900 | 0.85881900  |
| Br | 0.93423800  | 3.40399400  | -0.23354100 |

**Neutral-Cation-I Vacuum SP**

|   |             |             |             |
|---|-------------|-------------|-------------|
| N | -2.33376100 | -1.21953100 | 0.12003500  |
| H | -1.47321100 | -1.11497400 | -0.42996700 |
| C | -3.22307900 | -0.04442000 | -0.08948000 |
| C | -2.36055700 | 1.20598100  | 0.00047000  |
| H | -3.67735500 | -0.12232100 | -1.07726000 |
| H | -4.00449300 | -0.05312900 | 0.66958500  |
| O | -1.17196400 | 1.12258100  | 0.12976500  |
| H | -2.79396100 | -2.09448200 | -0.14396100 |
| O | -2.98265200 | 2.36747500  | -0.08727500 |
| C | 2.41009600  | 4.90505500  | -0.43891400 |

|   |             |             |             |   |             |             |             |
|---|-------------|-------------|-------------|---|-------------|-------------|-------------|
| C | 3.73629000  | 4.51143900  | -0.52746000 | H | -2.79396100 | -2.09448200 | -0.14396100 |
| C | 4.70100600  | 5.50392000  | -0.70401700 | O | -2.98265200 | 2.36747500  | -0.08727500 |
| C | 4.35468600  | 6.84663300  | -0.78971400 | C | 2.41009600  | 4.90505500  | -0.43891400 |
| C | 3.01168900  | 7.22942200  | -0.69821500 | C | 3.73629000  | 4.51143900  | -0.52746000 |
| C | 2.03536300  | 6.23819400  | -0.52303600 | C | 4.70100600  | 5.50392000  | -0.70401700 |
| H | 4.03710000  | 3.47482200  | -0.46384700 | C | 4.35468600  | 6.84663300  | -0.78971400 |
| H | 5.12278600  | 7.59748000  | -0.92850800 | C | 3.01168900  | 7.22942200  | -0.69821500 |
| H | 0.99203800  | 6.52437000  | -0.45734000 | C | 2.03536300  | 6.23819400  | -0.52303600 |
| N | 2.64480400  | 8.55884300  | -0.83834300 | H | 4.03710000  | 3.47482200  | -0.46384700 |
| H | 1.75621900  | 8.81778100  | -0.43581700 | H | 5.12278600  | 7.59748000  | -0.92850800 |
| H | 3.36765100  | 9.23630200  | -0.64437400 | H | 0.99203800  | 6.52437000  | -0.45734000 |
| C | 6.12409600  | 5.06723000  | -0.79690700 | N | 2.64480400  | 8.55884300  | -0.83834300 |
| O | 6.48922100  | 3.92109500  | -0.73201000 | H | 1.75621900  | 8.81778100  | -0.43581700 |
| O | 6.97639900  | 6.08839700  | -0.96279900 | H | 3.36765100  | 9.23630200  | -0.64437400 |
| H | 7.87203100  | 5.72602600  | -1.01498000 | C | 6.12409600  | 5.06723000  | -0.79690700 |
| H | -3.93975600 | 2.28593100  | -0.19654000 | O | 6.48922100  | 3.92109500  | -0.73201000 |
| H | -2.04143900 | -1.29566600 | 1.09859300  | O | 6.97639900  | 6.08839700  | -0.96279900 |
| I | 0.90852400  | 3.42502700  | -0.16700000 | H | 7.87203100  | 5.72602600  | -1.01498000 |

**Neutral-Cation-I TCM**

|   |             |             |             |
|---|-------------|-------------|-------------|
| N | -2.33376100 | -1.21953100 | 0.12003500  |
| H | -1.47321100 | -1.11497400 | -0.42996700 |
| C | -3.22307900 | -0.04442000 | -0.08948000 |
| C | -2.36055700 | 1.20598100  | 0.00047000  |
| H | -3.67735500 | -0.12232100 | -1.07726000 |
| H | -4.00449300 | -0.05312900 | 0.66958500  |
| O | -1.17196400 | 1.12258100  | 0.12976500  |

|   |             |             |             |
|---|-------------|-------------|-------------|
| H | -2.79396100 | -2.09448200 | -0.14396100 |
| O | -2.98265200 | 2.36747500  | -0.08727500 |
| C | 2.41009600  | 4.90505500  | -0.43891400 |
| C | 3.73629000  | 4.51143900  | -0.52746000 |
| C | 4.70100600  | 5.50392000  | -0.70401700 |
| C | 4.35468600  | 6.84663300  | -0.78971400 |
| C | 3.01168900  | 7.22942200  | -0.69821500 |
| C | 2.03536300  | 6.23819400  | -0.52303600 |
| H | 4.03710000  | 3.47482200  | -0.46384700 |
| H | 5.12278600  | 7.59748000  | -0.92850800 |
| H | 0.99203800  | 6.52437000  | -0.45734000 |
| N | 2.64480400  | 8.55884300  | -0.83834300 |
| H | 1.75621900  | 8.81778100  | -0.43581700 |
| H | 3.36765100  | 9.23630200  | -0.64437400 |
| C | 6.12409600  | 5.06723000  | -0.79690700 |
| O | 6.48922100  | 3.92109500  | -0.73201000 |
| O | 6.97639900  | 6.08839700  | -0.96279900 |
| H | 7.87203100  | 5.72602600  | -1.01498000 |
| H | -3.93975600 | 2.28593100  | -0.19654000 |
| H | -2.04143900 | -1.29566600 | 1.09859300  |
| I | 0.90852400  | 3.42502700  | -0.16700000 |

**Neutral-Cation-I DCE**

|   |             |             |             |
|---|-------------|-------------|-------------|
| N | -2.33516900 | -1.21738400 | 0.11726900  |
| H | -1.47597900 | -1.12023200 | -0.43507500 |
| C | -3.21612900 | -0.03686600 | -0.08508000 |
| C | -2.35152700 | 1.20995300  | 0.00008900  |

|                                 |             |             |             |   |             |             |             |
|---------------------------------|-------------|-------------|-------------|---|-------------|-------------|-------------|
| H                               | -3.67682800 | -0.10931400 | -1.07021200 | H | -1.47861000 | -1.12234800 | -0.44047200 |
| H                               | -3.99352500 | -0.04103000 | 0.67792300  | C | -3.21400000 | -0.03405100 | -0.08240200 |
| O                               | -1.15995900 | 1.13222900  | 0.11470900  | C | -2.34849200 | 1.21146600  | -0.00200600 |
| H                               | -2.80354000 | -2.08657400 | -0.15079800 | H | -3.67967600 | -0.10408600 | -1.06535800 |
| O                               | -2.97474900 | 2.37289800  | -0.07681200 | H | -3.98795700 | -0.03669800 | 0.68399600  |
| C                               | 2.40857700  | 4.89841300  | -0.44957800 | O | -1.15491900 | 1.13652300  | 0.09871400  |
| C                               | 3.73637300  | 4.50766400  | -0.53325300 | H | -2.80799200 | -2.08339100 | -0.15387400 |
| C                               | 4.70053400  | 5.50204400  | -0.70327600 | O | -2.97249300 | 2.37521000  | -0.06840000 |
| C                               | 4.35227000  | 6.84458200  | -0.78797300 | C | 2.40837600  | 4.89534500  | -0.45597500 |
| C                               | 3.00802500  | 7.22498800  | -0.70194100 | C | 3.73702000  | 4.50604400  | -0.53625500 |
| C                               | 2.03265900  | 6.23143400  | -0.53250400 | C | 4.70091400  | 5.50145700  | -0.70230000 |
| H                               | 4.03762100  | 3.47108100  | -0.47045500 | C | 4.35166400  | 6.84387400  | -0.78677400 |
| H                               | 5.11909500  | 7.59764200  | -0.92134400 | C | 3.00669500  | 7.22305900  | -0.70450700 |
| H                               | 0.98885800  | 6.51645700  | -0.46931200 | C | 2.03177300  | 6.22824600  | -0.53857100 |
| N                               | 2.63928500  | 8.55382700  | -0.84244800 | H | 4.03849800  | 3.46950000  | -0.47359600 |
| H                               | 1.74753500  | 8.80880000  | -0.44358600 | H | 5.11792800  | 7.59803800  | -0.91683500 |
| H                               | 3.35893600  | 9.23171700  | -0.63707600 | H | 0.98770300  | 6.51263200  | -0.47724100 |
| C                               | 6.12500700  | 5.06910400  | -0.79051900 | N | 2.63702600  | 8.55143400  | -0.84542400 |
| O                               | 6.49248900  | 3.92295900  | -0.72382200 | H | 1.74329700  | 8.80466500  | -0.44953100 |
| O                               | 6.97518000  | 6.09119300  | -0.95323400 | H | 3.35489600  | 9.22987900  | -0.63517200 |
| H                               | 7.87298300  | 5.73309600  | -1.00205400 | C | 6.12616700  | 5.07045600  | -0.78561600 |
| H                               | -3.93390000 | 2.28905900  | -0.16780300 | O | 6.49476500  | 3.92432000  | -0.71780000 |
| H                               | -2.04429900 | -1.30375300 | 1.09517000  | O | 6.97532400  | 6.09306200  | -0.94615800 |
| I                               | 0.90794900  | 3.41549600  | -0.18632200 | H | 7.87424000  | 5.73711700  | -0.99253700 |
|                                 |             |             |             | H | -3.93307000 | 2.29083800  | -0.14372100 |
|                                 |             |             |             | H | -2.04357400 | -1.30741300 | 1.09187600  |
|                                 |             |             |             | I | 0.90812500  | 3.41085500  | -0.19825700 |
| <b>Neutral-Cation-I Acetone</b> |             |             |             |   |             |             |             |
| N                               | -2.33585300 | -1.21654900 | 0.11487500  |   |             |             |             |



**Neutral-Cation-I DMSO**

|   |             |             |             |
|---|-------------|-------------|-------------|
| N | -2.33751400 | -1.21662400 | 0.11186000  |
| H | -1.48171600 | -1.12389900 | -0.44566900 |
| C | -3.21344800 | -0.03221600 | -0.08071400 |
| C | -2.34629100 | 1.21184000  | -0.00255100 |
| H | -3.68246700 | -0.09936300 | -1.06230200 |
| H | -3.98507200 | -0.03441300 | 0.68798400  |
| O | -1.15141300 | 1.13736200  | 0.08635400  |
| H | -2.81240400 | -2.08158300 | -0.15791900 |
| O | -2.96985100 | 2.37670400  | -0.05839000 |
| C | 2.40877000  | 4.89328900  | -0.46059400 |
| C | 3.73805100  | 4.50519200  | -0.53795400 |
| C | 4.70159000  | 5.50146400  | -0.70131900 |
| C | 4.35141500  | 6.84367400  | -0.78625300 |
| C | 3.00585800  | 7.22176900  | -0.70714100 |
| C | 2.03140500  | 6.22598100  | -0.54357300 |
| H | 4.03995700  | 3.46878500  | -0.47490900 |
| H | 5.11720000  | 7.59867500  | -0.91410300 |
| H | 0.98706100  | 6.50969800  | -0.48403000 |
| N | 2.63530300  | 8.54972000  | -0.84898500 |
| H | 1.74006200  | 8.80169800  | -0.45548300 |
| H | 3.35171900  | 9.22876500  | -0.63540500 |
| C | 6.12748000  | 5.07198800  | -0.78128400 |
| O | 6.49700000  | 3.92599000  | -0.71224200 |
| O | 6.97582800  | 6.09510900  | -0.94026500 |
| H | 7.87552700  | 5.74068700  | -0.98453000 |

|   |             |             |             |
|---|-------------|-------------|-------------|
| H | -3.93140800 | 2.29298200  | -0.12129500 |
| H | -2.04389800 | -1.31127300 | 1.08807800  |
| I | 0.90903000  | 3.40748500  | -0.20668400 |

**Neutral-Cation-I Water**

|   |             |             |             |
|---|-------------|-------------|-------------|
| N | -2.33867300 | -1.21688900 | 0.11018900  |
| H | -1.48318000 | -1.12455100 | -0.44778500 |
| C | -3.21338900 | -0.03139600 | -0.08026500 |
| C | -2.34512400 | 1.21175900  | -0.00219600 |
| H | -3.68347000 | -0.09684200 | -1.06148000 |
| H | -3.98432200 | -0.03356500 | 0.68911200  |
| O | -1.14984000 | 1.13683100  | 0.08221400  |
| H | -2.81467600 | -2.08090300 | -0.16060400 |
| O | -2.96799000 | 2.37732500  | -0.05336000 |
| C | 2.40906800  | 4.89248400  | -0.46201100 |
| C | 3.73861000  | 4.50493000  | -0.53821900 |
| C | 4.70191300  | 5.50157300  | -0.70084200 |
| C | 4.35126700  | 6.84364900  | -0.78625900 |
| C | 3.00546400  | 7.22123400  | -0.70838300 |
| C | 2.03128300  | 6.22503500  | -0.54544300 |
| H | 4.04078500  | 3.46862200  | -0.47479100 |
| H | 5.11680900  | 7.59899400  | -0.91348500 |
| H | 0.98680900  | 6.50841100  | -0.48663400 |
| N | 2.63445100  | 8.54895800  | -0.85087600 |
| H | 1.73863600  | 8.80049600  | -0.45832200 |
| H | 3.35026900  | 9.22835800  | -0.63631500 |
| C | 6.12807600  | 5.07277000  | -0.77948500 |

O 6.49802900 3.92687500 -0.70975300  
O 6.97603500 6.09612300 -0.93811100  
H 7.87603700 5.74230700 -0.98152100  
H -3.92989900 2.29432600 -0.11167300  
H -2.04488100 -1.31352700 1.08615800  
I 0.90967700 3.40609800 -0.20917600

**Anion-Cation-Cl Vacuum SP**

N -2.38186800 -1.20036200 -0.03809800  
H -1.48100400 -1.01175500 -0.49742900  
C -3.21760500 0.03180700 -0.07265500  
C -2.27802700 1.21749400 0.12204000  
H -3.70252500 0.09774900 -1.04708100  
H -3.97419200 -0.03058500 0.70759000  
O -1.09181700 1.06293600 0.10876800  
H -2.83773100 -1.98988500 -0.50076300  
O -2.83814800 2.40493800 0.27882000  
C 2.18780100 4.59726400 -0.41623200  
C 3.51944200 4.22241600 -0.45869100  
C 4.47952700 5.21645300 -0.65620500  
C 4.08905200 6.54024300 -0.80784500  
C 2.73891900 6.90437600 -0.76479800  
C 1.77218400 5.91273100 -0.56704700  
H 3.82930100 3.19299600 -0.34139800  
H 4.85844600 7.28885900 -0.96001100  
H 0.71850000 6.16408900 -0.53433300  
Cl 0.95949700 3.36440600 -0.16525700

N 2.35152800 8.23148600 -0.97640900  
H 1.47514600 8.48958700 -0.54540300  
H 3.07276000 8.90924900 -0.77278500  
C 5.97613400 4.84250200 -0.69921700  
O 6.23767300 3.62583400 -0.59268700  
O 6.77275200 5.79420600 -0.83404500  
H -3.80387700 2.37963800 0.27429400  
H -2.16443700 -1.47966200 0.92294000

**Anion-Cation-Cl TCM ModRedundant**

N -2.38186800 -1.20036200 -0.03809800  
H -1.48100400 -1.01175500 -0.49742900  
C -3.21760500 0.03180700 -0.07265500  
C -2.27802700 1.21749400 0.12204000  
H -3.70252500 0.09774900 -1.04708100  
H -3.97419200 -0.03058500 0.70759000  
O -1.09181700 1.06293600 0.10876800  
H -2.83773100 -1.98988500 -0.50076300  
O -2.83814800 2.40493800 0.27882000  
C 2.18780100 4.59726400 -0.41623200  
C 3.51944200 4.22241600 -0.45869100  
C 4.47952700 5.21645300 -0.65620500  
C 4.08905200 6.54024300 -0.80784500  
C 2.73891900 6.90437600 -0.76479800  
C 1.77218400 5.91273100 -0.56704700  
H 3.82930100 3.19299600 -0.34139800  
H 4.85844600 7.28885900 -0.96001100

H 0.71850000 6.16408900 -0.53433300  
 Cl 0.95949700 3.36440600 -0.16525700  
 N 2.35152800 8.23148600 -0.97640900  
 H 1.47514600 8.48958700 -0.54540300  
 H 3.07276000 8.90924900 -0.77278500  
 C 5.97613400 4.84250200 -0.69921700  
 O 6.23767300 3.62583400 -0.59268700  
 O 6.77275200 5.79420600 -0.83404500  
 H -3.80387700 2.37963800 0.27429400  
 H -2.16443700 -1.47966200 0.92294000

A 15 10 7 120.0 F

D 15 10 7 4 0.0 F

**Anion-Cation-Cl DCE**

N -2.38899800 -1.23029500 -0.02293000  
 H -1.49034800 -1.07157900 -0.49464500  
 C -3.20784600 0.01078000 -0.07341900  
 C -2.26546800 1.19042600 0.12218900  
 H -3.68387600 0.07614600 -1.05202600  
 H -3.97305600 -0.03794600 0.69937300  
 O -1.07754600 1.03877300 0.12863100  
 H -2.86275300 -2.02000900 -0.46735100  
 O -2.82369500 2.38277300 0.25902800  
 C 2.16339800 4.63454000 -0.42829600  
 C 3.48982700 4.23789100 -0.47113300  
 C 4.46725300 5.21681200 -0.65972400

C 4.10075900 6.54885800 -0.80274300  
 C 2.75646900 6.93595800 -0.75963900  
 C 1.77319900 5.95844100 -0.56920700  
 H 3.77839200 3.20189600 -0.35878600  
 H 4.88023200 7.28799100 -0.94827400  
 H 0.72429700 6.22903800 -0.53463700  
 Cl 0.91844400 3.41997900 -0.18392000  
 N 2.39248000 8.26803700 -0.96459500  
 H 1.51100200 8.53727600 -0.55085600  
 H 3.11903000 8.93694000 -0.75082500  
 C 5.95417400 4.81736800 -0.70277000  
 O 6.19983200 3.59617500 -0.59784500  
 O 6.77276600 5.75204300 -0.83648700  
 H -3.78985900 2.35871500 0.24597000  
 H -2.17067700 -1.49801900 0.94097700

**Anion-Cation-Cl Acetone**

N -2.40654800 -1.23907600 -0.02000300  
 H -1.51530000 -1.09816900 -0.50973200  
 C -3.21403200 0.00859200 -0.06866700  
 C -2.26488700 1.18254000 0.11746900  
 H -3.69562200 0.07565400 -1.04437000  
 H -3.97524800 -0.03164300 0.70858900  
 O -1.07654400 1.02893200 0.11909500  
 H -2.89760800 -2.02746100 -0.44797400  
 O -2.81731700 2.37861000 0.25107200  
 C 2.17251800 4.63410600 -0.43344400

|                             |             |             |             |    |             |             |             |
|-----------------------------|-------------|-------------|-------------|----|-------------|-------------|-------------|
| C                           | 3.50056500  | 4.24147300  | -0.47439200 | O  | -2.48525800 | 2.39451600  | 0.31560100  |
| C                           | 4.47519600  | 5.22418300  | -0.65834400 | C  | 2.19101900  | 4.57311700  | -0.33719100 |
| C                           | 4.10528500  | 6.55566300  | -0.79888100 | C  | 3.53430900  | 4.23293100  | -0.33866800 |
| C                           | 2.75930100  | 6.93872300  | -0.75836800 | C  | 4.47393600  | 5.25112000  | -0.51039500 |
| C                           | 1.77883800  | 5.95706000  | -0.57219900 | C  | 4.05612900  | 6.56579200  | -0.67470400 |
| H                           | 3.79076400  | 3.20574500  | -0.36412800 | C  | 2.69500500  | 6.89554200  | -0.67506800 |
| H                           | 4.88147000  | 7.29885500  | -0.94081800 | C  | 1.74947000  | 5.87785600  | -0.50061700 |
| H                           | 0.72911100  | 6.22448000  | -0.53879200 | H  | 3.86119200  | 3.21010000  | -0.21158400 |
| Cl                          | 0.93137500  | 3.41548700  | -0.19445500 | H  | 4.80487500  | 7.33860200  | -0.80555100 |
| N                           | 2.39218900  | 8.26867800  | -0.96214200 | H  | 0.68992000  | 6.10477700  | -0.49316800 |
| H                           | 1.50426300  | 8.53401800  | -0.55974600 | Cl | 0.99465000  | 3.30673100  | -0.11911200 |
| H                           | 3.11319400  | 8.94177000  | -0.74289000 | N  | 2.28457600  | 8.22326400  | -0.78430400 |
| C                           | 5.96197600  | 4.82959200  | -0.70017800 | H  | 2.94531000  | 8.83224500  | -1.24643600 |
| O                           | 6.21359000  | 3.60863400  | -0.60104200 | H  | 1.34850200  | 8.35405600  | -1.14174100 |
| O                           | 6.78045500  | 5.76598300  | -0.82788000 | C  | 5.97425800  | 4.91276100  | -0.51693600 |
| H                           | -3.78388900 | 2.35744900  | 0.24581700  | O  | 6.27072000  | 3.70360600  | -0.39539100 |
| H                           | -2.17566400 | -1.50087000 | 0.94246300  | O  | 6.76167200  | 5.87633400  | -0.64203800 |
| <b>Anion-Cation-Cl DMSO</b> |             |             |             | H  | -3.43868700 | 2.51137700  | 0.20613600  |
| N                           | -2.53467800 | -1.22093800 | -0.21669900 | H  | -2.09729300 | -1.49350800 | 0.66845900  |

|   |             |             |             |
|---|-------------|-------------|-------------|
| H | -1.79280000 | -1.21723300 | -0.92317200 |
| C | -3.17811500 | 0.11425300  | -0.11264500 |
| C | -2.09240200 | 1.13630100  | 0.17917000  |
| H | -3.67761700 | 0.33556100  | -1.05552800 |
| H | -3.91538200 | 0.08396900  | 0.68906900  |
| O | -0.94152900 | 0.81818900  | 0.27857100  |
| H | -3.21434800 | -1.94231200 | -0.46999600 |

**Anion-Cation-Cl Water**

|   |             |             |             |
|---|-------------|-------------|-------------|
| N | -2.53933700 | -1.22137400 | -0.21840100 |
| H | -1.79713900 | -1.21886500 | -0.92451000 |
| C | -3.17854800 | 0.11547700  | -0.11216500 |
| C | -2.09022800 | 1.13437200  | 0.17971500  |
| H | -3.67811600 | 0.33964000  | -1.05433200 |
| H | -3.91543800 | 0.08644400  | 0.68992100  |

|    |             |             |             |    |             |             |             |
|----|-------------|-------------|-------------|----|-------------|-------------|-------------|
| O  | -0.93941200 | 0.81454100  | 0.27567200  | H  | -3.66803800 | 0.04670000  | -1.08131200 |
| H  | -3.22121400 | -1.93994500 | -0.47370100 | H  | -4.00088800 | -0.07556800 | 0.66208200  |
| O  | -2.48053800 | 2.39303500  | 0.32017900  | O  | -1.11067500 | 1.04764400  | 0.16249200  |
| C  | 2.19304200  | 4.57184000  | -0.33834100 | H  | -2.79900100 | -2.02717000 | -0.49878100 |
| C  | 3.53682100  | 4.23330200  | -0.33843700 | O  | -2.87656900 | 2.36979800  | 0.26160800  |
| C  | 4.47530500  | 5.25260000  | -0.50987600 | C  | 2.25953600  | 4.76235300  | -0.43722100 |
| C  | 4.05608800  | 6.56674100  | -0.67520300 | C  | 3.58211500  | 4.35512700  | -0.48426900 |
| C  | 2.69448600  | 6.89490300  | -0.67656700 | C  | 4.56650900  | 5.32686700  | -0.67695000 |
| C  | 1.75009000  | 5.87595500  | -0.50259100 | C  | 4.20873100  | 6.66085200  | -0.81948400 |
| H  | 3.86460000  | 3.21087800  | -0.21049800 | C  | 2.86839300  | 7.05801900  | -0.77087400 |
| H  | 4.80375800  | 7.34061400  | -0.80585900 | C  | 1.87725500  | 6.08931900  | -0.57713400 |
| H  | 0.69026700  | 6.10159600  | -0.49630200 | H  | 3.87134900  | 3.31921400  | -0.37315900 |
| Cl | 0.99812700  | 3.30410400  | -0.12101100 | H  | 4.99590600  | 7.39141500  | -0.96849200 |
| N  | 2.28261100  | 8.22180400  | -0.78615400 | H  | 0.83187200  | 6.37248300  | -0.54091100 |
| H  | 2.94212100  | 8.83199800  | -1.24839500 | N  | 2.51329400  | 8.39541100  | -0.97295800 |
| H  | 1.34572200  | 8.35192500  | -1.14166400 | H  | 1.64314100  | 8.67199500  | -0.54077600 |
| C  | 5.97574100  | 4.91604500  | -0.51450100 | H  | 3.25076100  | 9.05446200  | -0.76621400 |
| O  | 6.27404900  | 3.70777300  | -0.38772900 | C  | 6.05354200  | 4.91478300  | -0.72365100 |
| O  | 6.76256800  | 5.87978900  | -0.64320900 | O  | 6.28439500  | 3.69270400  | -0.60985100 |
| H  | -3.43412300 | 2.51143300  | 0.21348900  | O  | 6.87311700  | 5.84521400  | -0.86777800 |
| H  | -2.10386900 | -1.49761800 | 0.66653400  | H  | -3.84130500 | 2.33507800  | 0.22389400  |
|    |             |             |             | H  | -2.18896300 | -1.50790100 | 0.95003900  |
|    |             |             |             | Br | 0.89641400  | 3.44775600  | -0.16911300 |

**Anion-Cation-Br Vacuum SP**

|   |             |             |             |
|---|-------------|-------------|-------------|
| N | -2.37048300 | -1.23222400 | -0.01947800 |
| H | -1.45404100 | -1.03480300 | -0.44297100 |
| C | -3.21711600 | -0.00917600 | -0.09027100 |
| C | -2.29887100 | 1.18821300  | 0.13153000  |

**Anion-Cation-Br TCM**

|   |             |             |             |
|---|-------------|-------------|-------------|
| N | -2.37048300 | -1.23222400 | -0.01947800 |
| H | -1.45404100 | -1.03480300 | -0.44297100 |

|                            |             |             |             |    |             |             |             |
|----------------------------|-------------|-------------|-------------|----|-------------|-------------|-------------|
| C                          | -3.21711600 | -0.00917600 | -0.09027100 | N  | -2.40686000 | -1.24319900 | -0.02223500 |
| C                          | -2.29887100 | 1.18821300  | 0.13153000  | H  | -1.51022400 | -1.08326100 | -0.49739200 |
| H                          | -3.66803800 | 0.04670000  | -1.08131200 | C  | -3.22938100 | -0.00459300 | -0.07181600 |
| H                          | -4.00088800 | -0.07556800 | 0.66208200  | C  | -2.29063900 | 1.17864400  | 0.11689000  |
| O                          | -1.11067500 | 1.04764400  | 0.16249200  | H  | -3.70963100 | 0.05763800  | -1.04861400 |
| H                          | -2.79900100 | -2.02717000 | -0.49878100 | H  | -3.99130800 | -0.05384800 | 0.70417900  |
| O                          | -2.87656900 | 2.36979800  | 0.26160800  | O  | -1.10157900 | 1.03127100  | 0.11709700  |
| C                          | 2.25953600  | 4.76235300  | -0.43722100 | H  | -2.88018200 | -2.03474800 | -0.46388600 |
| C                          | 3.58211500  | 4.35512700  | -0.48426900 | O  | -2.85162800 | 2.36904700  | 0.25320800  |
| C                          | 4.56650900  | 5.32686700  | -0.67695000 | C  | 2.27934700  | 4.75042500  | -0.45415000 |
| C                          | 4.20873100  | 6.66085200  | -0.81948400 | C  | 3.60754700  | 4.35744200  | -0.49064800 |
| C                          | 2.86839300  | 7.05801900  | -0.77087400 | C  | 4.58329100  | 5.34068900  | -0.66907100 |
| C                          | 1.87725500  | 6.08931900  | -0.57713400 | C  | 4.21376200  | 6.67204700  | -0.80857700 |
| H                          | 3.87134900  | 3.31921400  | -0.37315900 | C  | 2.86827000  | 7.05536100  | -0.77219600 |
| H                          | 4.99590600  | 7.39141500  | -0.96849200 | C  | 1.88597900  | 6.07417400  | -0.59190000 |
| H                          | 0.83187200  | 6.37248300  | -0.54091100 | H  | 3.90345100  | 3.32321000  | -0.38216400 |
| N                          | 2.51329400  | 8.39541100  | -0.97295800 | H  | 4.99206900  | 7.41387900  | -0.94679700 |
| H                          | 1.64314100  | 8.67199500  | -0.54077600 | H  | 0.83752200  | 6.34680700  | -0.56360400 |
| H                          | 3.25076100  | 9.05446200  | -0.76621400 | N  | 2.50197800  | 8.38716400  | -0.97414600 |
| C                          | 6.05354200  | 4.91478300  | -0.72365100 | H  | 1.61676000  | 8.65245700  | -0.56592000 |
| O                          | 6.28439500  | 3.69270400  | -0.60985100 | H  | 3.22511200  | 9.05744300  | -0.75326600 |
| O                          | 6.87311700  | 5.84521400  | -0.86777800 | C  | 6.07201800  | 4.94599100  | -0.70553400 |
| H                          | -3.84130500 | 2.33507800  | 0.22389400  | O  | 6.32115600  | 3.72531400  | -0.60418600 |
| H                          | -2.18896300 | -1.50790100 | 0.95003900  | O  | 6.88776000  | 5.88421500  | -0.83119200 |
| Br                         | 0.89641400  | 3.44775600  | -0.16911300 | H  | -3.81782700 | 2.34201100  | 0.24871700  |
|                            |             |             |             | H  | -2.18481600 | -1.50905100 | 0.94130400  |
| <b>Anion-Cation-Br DCE</b> |             |             |             | Br | 0.92843500  | 3.42203400  | -0.20410600 |

**Anion-Cation-Br Acetone**

|   |             |             |             |
|---|-------------|-------------|-------------|
| N | -2.42098700 | -1.24873500 | -0.06848200 |
| H | -1.53071000 | -1.10591600 | -0.55943100 |
| C | -3.23203900 | -0.00346200 | -0.11661100 |
| C | -2.28683600 | 1.17376800  | 0.06661700  |
| H | -3.71551200 | 0.06177000  | -1.09156800 |
| H | -3.99187300 | -0.04523800 | 0.66191700  |
| O | -1.09744600 | 1.02390900  | 0.06527200  |
| H | -2.91055000 | -2.03851200 | -0.49563900 |
| O | -2.84201100 | 2.36788100  | 0.19993200  |
| C | 2.29051900  | 4.75031600  | -0.38400900 |
| C | 3.62087300  | 4.36318800  | -0.42290400 |
| C | 4.59327700  | 5.35370800  | -0.57724600 |
| C | 4.21996700  | 6.68696400  | -0.68786000 |
| C | 2.87256200  | 7.06466400  | -0.64968900 |
| C | 1.89366000  | 6.07549100  | -0.49319400 |
| H | 3.91874300  | 3.32732600  | -0.33774600 |
| H | 4.99550400  | 7.43491800  | -0.80693400 |
| H | 0.84462300  | 6.34457300  | -0.45762700 |
| N | 2.50900400  | 8.40994700  | -0.70326100 |
| H | 3.18390200  | 9.01030800  | -1.15608800 |
| H | 1.57263300  | 8.58742200  | -1.03887000 |
| C | 6.08181800  | 4.96557100  | -0.62477500 |
| O | 6.33846400  | 3.74396600  | -0.55113000 |
| O | 6.89613500  | 5.90814400  | -0.73199100 |
| H | -3.80856400 | 2.34404900  | 0.19903900  |

|    |             |             |             |
|----|-------------|-------------|-------------|
| H  | -2.18837400 | -1.50972900 | 0.89377600  |
| Br | 0.94360000  | 3.41227200  | -0.17149700 |

**Anion-Cation-Br DMSO**

|   |             |             |             |
|---|-------------|-------------|-------------|
| N | -2.31610700 | -1.15144100 | -0.26017800 |
| H | -1.65388800 | -1.08936800 | -1.03851900 |
| C | -3.16201900 | 0.06619600  | -0.16293100 |
| C | -2.27996900 | 1.21619800  | 0.29171800  |
| H | -3.61013300 | 0.26309400  | -1.13554200 |
| H | -3.94992400 | -0.11543900 | 0.56778000  |
| O | -1.13332200 | 1.04452200  | 0.59660600  |
| H | -2.88277100 | -1.99247600 | -0.39616100 |
| O | -2.84791200 | 2.41152100  | 0.34773400  |
| C | 2.25735100  | 4.71974200  | -0.26021900 |
| C | 3.58798500  | 4.33293000  | -0.29251700 |
| C | 4.55467000  | 5.31152200  | -0.53393400 |
| C | 4.17587900  | 6.63297500  | -0.73327100 |
| C | 2.82797800  | 7.01062600  | -0.69843700 |
| C | 1.85474400  | 6.03306500  | -0.45596700 |
| H | 3.88939200  | 3.30618700  | -0.13817400 |
| H | 4.94638400  | 7.37280000  | -0.91785700 |
| H | 0.80561100  | 6.30203100  | -0.42341400 |
| N | 2.45980200  | 8.34735200  | -0.84052600 |
| H | 3.12382900  | 8.91729900  | -1.34573000 |
| H | 1.51586900  | 8.50043300  | -1.16693700 |
| C | 6.04221800  | 4.92185400  | -0.57750700 |
| O | 6.30508500  | 3.71432600  | -0.38500400 |

O 6.85268200 5.84773700 -0.80031400  
H -3.77268500 2.40828500 0.06486200  
H -1.75794400 -1.27000700 0.59157600  
Br 0.91757900 3.39659900 0.06286400

**Anion-Cation-Br Water**

N -2.56833600 -1.25386700 0.10331100  
H -1.68729400 -1.35153600 -0.41153000  
C -3.19670800 0.06116300 -0.18259300  
C -2.13854500 1.13666900 -0.00207700  
H -3.55786200 0.05768100 -1.21085200  
H -4.03703200 0.20577400 0.49459300  
O -0.99221300 0.86014000 0.21551200  
H -3.18515200 -2.02661200 -0.15835600  
O -2.54534100 2.39199100 -0.11350700  
C 2.31906500 4.69790200 -0.34971900  
C 3.65570800 4.34963400 -0.46639400  
C 4.59245100 5.37146900 -0.63617900  
C 4.17916600 6.69667000 -0.68479900  
C 2.82553800 7.03530400 -0.56819800  
C 1.88230900 6.01421000 -0.39654000  
H 3.98463700 3.32028100 -0.42989800  
H 4.92634800 7.47089100 -0.81613300  
H 0.82967500 6.25249000 -0.30114700  
N 2.42416700 8.36977600 -0.55853200  
H 3.05693000 9.00468400 -1.02487100  
H 1.46603400 8.53145700 -0.83584300

C 6.08498700 5.02586100 -0.76982900  
O 6.37827900 3.81027700 -0.74175500  
O 6.87053800 5.99127800 -0.89362900  
H -3.49356300 2.47138000 -0.28400200  
H -2.34291300 -1.35429100 1.09693800  
Br 1.01951300 3.31788600 -0.11397400

**Anion-Cation-I Vacuum SP**

N -2.41011400 -1.25358800 -0.01550500  
H -1.49681500 -1.05710300 -0.44599100  
C -3.26052300 -0.03327600 -0.08550700  
C -2.34701400 1.16828400 0.12823100  
H -3.71587800 0.01905500 -1.07480800  
H -4.04085100 -0.10022100 0.67032200  
O -1.15695000 1.03349600 0.15086300  
H -2.84024200 -2.05125300 -0.48900200  
O -2.92711500 2.34734200 0.25899700  
C 2.42856300 4.90272700 -0.45253500  
C 3.75698800 4.51349300 -0.50234100  
C 4.73032400 5.49677400 -0.69743800  
C 4.35744600 6.82610900 -0.84048100  
C 3.01302500 7.20722800 -0.79005500  
C 2.03356800 6.22641800 -0.59308200  
H 4.06653500 3.48327000 -0.39303700  
H 5.13631700 7.56516700 -0.99181200  
H 0.98706100 6.50580600 -0.55640500  
N 2.64162400 8.54050400 -0.99343800



|   |             |             |             |
|---|-------------|-------------|-------------|
| H | 1.76841300  | 8.80645100  | -0.56064100 |
| H | 3.37091200  | 9.20823200  | -0.78519500 |
| C | 6.22237600  | 5.10281900  | -0.74679500 |
| O | 6.46883200  | 3.88312600  | -0.64088700 |
| O | 7.03006100  | 6.04455200  | -0.88517000 |
| H | -3.89212600 | 2.31064300  | 0.22877900  |
| H | -2.22239200 | -1.52552000 | 0.95389200  |
| I | 0.92682100  | 3.41540600  | -0.15199900 |

**Anion-Cation-I TCM**

|   |             |             |             |
|---|-------------|-------------|-------------|
| N | -2.41011400 | -1.25358800 | -0.01550500 |
| H | -1.49681500 | -1.05710300 | -0.44599100 |
| C | -3.26052300 | -0.03327600 | -0.08550700 |
| C | -2.34701400 | 1.16828400  | 0.12823100  |
| H | -3.71587800 | 0.01905500  | -1.07480800 |
| H | -4.04085100 | -0.10022100 | 0.67032200  |
| O | -1.15695000 | 1.03349600  | 0.15086300  |
| H | -2.84024200 | -2.05125300 | -0.48900200 |
| O | -2.92711500 | 2.34734200  | 0.25899700  |
| C | 2.42856300  | 4.90272700  | -0.45253500 |
| C | 3.75698800  | 4.51349300  | -0.50234100 |
| C | 4.73032400  | 5.49677400  | -0.69743800 |
| C | 4.35744600  | 6.82610900  | -0.84048100 |
| C | 3.01302500  | 7.20722800  | -0.79005500 |
| C | 2.03356800  | 6.22641800  | -0.59308200 |
| H | 4.06653500  | 3.48327000  | -0.39303700 |
| H | 5.13631700  | 7.56516700  | -0.99181200 |

|   |             |             |             |
|---|-------------|-------------|-------------|
| H | 0.98706100  | 6.50580600  | -0.55640500 |
| N | 2.64162400  | 8.54050400  | -0.99343800 |
| H | 1.76841300  | 8.80645100  | -0.56064100 |
| H | 3.37091200  | 9.20823200  | -0.78519500 |
| C | 6.22237600  | 5.10281900  | -0.74679500 |
| O | 6.46883200  | 3.88312600  | -0.64088700 |
| O | 7.03006100  | 6.04455200  | -0.88517000 |
| H | -3.89212600 | 2.31064300  | 0.22877900  |
| H | -2.22239200 | -1.52552000 | 0.95389200  |
| I | 0.92682100  | 3.41540600  | -0.15199900 |

**Anion-Cation-I DCE**

|   |             |             |             |
|---|-------------|-------------|-------------|
| N | -2.42778900 | -1.25309900 | -0.02198700 |
| H | -1.53564300 | -1.08957700 | -0.50425900 |
| C | -3.25882600 | -0.02025000 | -0.06761500 |
| C | -2.32916300 | 1.17038500  | 0.11376400  |
| H | -3.74551300 | 0.03787800  | -1.04155500 |
| H | -4.01572300 | -0.07397400 | 0.71299100  |
| O | -1.13796100 | 1.03242300  | 0.10620300  |
| H | -2.89975300 | -2.04831300 | -0.45864500 |
| O | -2.89641900 | 2.35636700  | 0.25123000  |
| C | 2.43504100  | 4.88721100  | -0.46777500 |
| C | 3.76846000  | 4.50967600  | -0.50671500 |
| C | 4.73610900  | 5.50108900  | -0.68814300 |
| C | 4.35513900  | 6.82885200  | -0.82912200 |
| C | 3.00671700  | 7.19943000  | -0.79152500 |
| C | 2.03356400  | 6.20887000  | -0.60750700 |

|   |             |             |             |   |             |             |             |
|---|-------------|-------------|-------------|---|-------------|-------------|-------------|
| H | 4.08174800  | 3.48047500  | -0.39879000 | C | 3.00542400  | 7.19838500  | -0.78956300 |
| H | 5.12666600  | 7.57741500  | -0.96972300 | C | 2.03327000  | 6.20541500  | -0.61027200 |
| H | 0.98485200  | 6.48111300  | -0.57912700 | H | 4.08256900  | 3.47875300  | -0.40445500 |
| N | 2.62726200  | 8.52791500  | -0.99584200 | H | 5.12429000  | 7.58064300  | -0.96138800 |
| H | 1.74070900  | 8.78492900  | -0.58503100 | H | 0.98433100  | 6.47686800  | -0.58281100 |
| H | 3.34416300  | 9.20493800  | -0.77478200 | N | 2.62513900  | 8.52560100  | -0.99196900 |
| C | 6.22812900  | 5.11950200  | -0.72656000 | H | 1.73266400  | 8.77974700  | -0.59222500 |
| O | 6.48872300  | 3.90069300  | -0.63071000 | H | 3.33748500  | 9.20530800  | -0.76458000 |
| O | 7.03564500  | 6.06551600  | -0.84837800 | C | 6.22756000  | 5.12146200  | -0.72403700 |
| H | -3.86252000 | 2.32404800  | 0.25385400  | O | 6.49165300  | 3.90251600  | -0.63275100 |
| H | -2.19744800 | -1.51632700 | 0.94028600  | O | 7.03704900  | 6.06715700  | -0.84110600 |
| I | 0.94267600  | 3.38875700  | -0.18557600 | H | -3.85587400 | 2.32671500  | 0.25088000  |
|   |             |             |             | H | -2.18925200 | -1.51013800 | 0.94152200  |
|   |             |             |             | I | 0.94411300  | 3.38328700  | -0.19693500 |

**Anion-Cation-I Acetone**

|   |             |             |             |
|---|-------------|-------------|-------------|
| N | -2.43073600 | -1.25299500 | -0.01952700 |
| H | -1.54537500 | -1.10288700 | -0.51715700 |
| C | -3.25548800 | -0.01676400 | -0.06435200 |
| C | -2.32368700 | 1.17167500  | 0.10965400  |
| H | -3.74636100 | 0.04139600  | -1.03609400 |
| H | -4.00943500 | -0.06527200 | 0.71946700  |
| O | -1.13164700 | 1.03572600  | 0.09916000  |
| H | -2.91522600 | -2.04863400 | -0.44164100 |
| O | -2.88955400 | 2.35929200  | 0.24414300  |
| C | 2.43503800  | 4.88366400  | -0.47314000 |
| C | 3.76964100  | 4.50826100  | -0.51030800 |
| C | 4.73653600  | 5.50133700  | -0.68677700 |
| C | 4.35471800  | 6.82942300  | -0.82477700 |

**Anion-Cation-I DMSO**

|   |             |             |             |
|---|-------------|-------------|-------------|
| N | -2.43386800 | -1.25751400 | -0.06934600 |
| H | -1.55001400 | -1.11431700 | -0.57091900 |
| C | -3.25600300 | -0.02028700 | -0.11859000 |
| C | -2.32583500 | 1.16774600  | 0.06090500  |
| H | -3.74150000 | 0.03863200  | -1.09290400 |
| H | -4.01463700 | -0.06780100 | 0.66078300  |
| O | -1.13310800 | 1.03415100  | 0.05917000  |
| H | -2.92250700 | -2.05384400 | -0.48549600 |
| O | -2.89349800 | 2.35539100  | 0.19075500  |
| C | 2.44254400  | 4.88786300  | -0.39541100 |
| C | 3.77817800  | 4.51547300  | -0.43623200 |

|   |             |             |             |
|---|-------------|-------------|-------------|
| C | 4.74364600  | 5.51318900  | -0.59317000 |
| C | 4.36053200  | 6.84350000  | -0.70520500 |
| C | 3.01038200  | 7.20984000  | -0.66579000 |
| C | 2.03982100  | 6.21169600  | -0.50629800 |
| H | 4.09176100  | 3.48422300  | -0.35098600 |
| H | 5.12906000  | 7.59838900  | -0.82636300 |
| H | 0.99084000  | 6.48168300  | -0.47162000 |
| N | 2.63517000  | 8.55183100  | -0.72068400 |
| H | 3.30179000  | 9.15712100  | -1.17936000 |
| H | 1.69529100  | 8.72019300  | -1.05150500 |
| C | 6.23415400  | 5.13635800  | -0.64149300 |
| O | 6.50197100  | 3.91648700  | -0.57225900 |
| O | 7.04319700  | 6.08451300  | -0.74489200 |
| H | -3.85993800 | 2.32152100  | 0.19064900  |
| H | -2.19089300 | -1.51068400 | 0.89235800  |
| I | 0.95231100  | 3.38058600  | -0.15713300 |

**Anion-Cation-I Water**

|   |             |             |             |
|---|-------------|-------------|-------------|
| N | -2.43177600 | -1.25183800 | -0.01625500 |
| H | -1.55196900 | -1.11273200 | -0.52587500 |
| C | -3.25209900 | -0.01348200 | -0.06336000 |
| C | -2.31962800 | 1.17367600  | 0.10729100  |
| H | -3.74343500 | 0.04396000  | -1.03482600 |
| H | -4.00602600 | -0.05782600 | 0.72075900  |
| O | -1.12688700 | 1.03939200  | 0.09853300  |
| H | -2.92561900 | -2.04875200 | -0.42514100 |
| O | -2.88516900 | 2.36241800  | 0.23723700  |

|   |             |             |             |
|---|-------------|-------------|-------------|
| C | 2.43502900  | 4.88016300  | -0.47650200 |
| C | 3.77050600  | 4.50650400  | -0.51345600 |
| C | 4.73656000  | 5.50104900  | -0.68655000 |
| C | 4.35386400  | 6.82936300  | -0.82158900 |
| C | 3.00385200  | 7.19694300  | -0.78714400 |
| C | 2.03274400  | 6.20197700  | -0.61098000 |
| H | 4.08352400  | 3.47681200  | -0.40981000 |
| H | 5.12177900  | 7.58272000  | -0.95534700 |
| H | 0.98362400  | 6.47265000  | -0.58324200 |
| N | 2.62266000  | 8.52315800  | -0.98740100 |
| H | 1.72569300  | 8.77481100  | -0.59611900 |
| H | 3.33139800  | 9.20498300  | -0.75516600 |
| C | 6.22675000  | 5.12258800  | -0.72431400 |
| O | 6.49361900  | 3.90355600  | -0.63674700 |
| O | 7.03754700  | 6.06811400  | -0.83864300 |
| H | -3.85167900 | 2.32954700  | 0.24316600  |
| H | -2.18151200 | -1.50198400 | 0.94432900  |
| I | 0.94549400  | 3.37817000  | -0.20388800 |

**Neutral-Cation-Cl oxocarbenium<sup>+</sup> DCE**

|   |             |             |            |
|---|-------------|-------------|------------|
| C | -4.51802900 | -3.28805900 | 0.00174300 |
| C | -3.00166800 | -3.33665000 | 0.17443300 |
| C | -2.45273500 | -1.91366300 | 0.19507800 |
| C | -3.32821000 | -0.94023600 | 0.85378000 |
| C | -5.13526800 | -2.49666100 | 1.12708700 |
| H | -1.46699600 | -1.81609200 | 0.66338700 |
| H | -2.75091600 | -3.84000300 | 1.11048400 |

|    |             |             |             |   |             |             |             |
|----|-------------|-------------|-------------|---|-------------|-------------|-------------|
| H  | -2.53390300 | -3.89424100 | -0.63494300 | C | -4.52525600 | -3.34953900 | 0.03244000  |
| H  | -4.78530000 | -2.83785400 | -0.95832100 | C | -2.99947900 | -3.37402700 | -0.01322400 |
| H  | -4.95064600 | -4.28890500 | 0.02937900  | C | -2.47432700 | -1.94190800 | 0.00167800  |
| H  | -3.00346300 | 0.08847200  | 1.01124500  | C | -3.26029400 | -1.02086300 | 0.82734200  |
| H  | -5.00130800 | -2.95542900 | 2.10630700  | C | -4.98612100 | -2.62927700 | 1.27413800  |
| H  | -6.17933400 | -2.23893800 | 0.97449600  | H | -1.43325600 | -1.84575400 | 0.32987500  |
| H  | -2.31138400 | -1.49656200 | -0.81508500 | H | -2.61131500 | -3.91499800 | 0.85237300  |
| O  | -4.48448700 | -1.16476600 | 1.26437000  | H | -2.64338000 | -3.88239700 | -0.90722300 |
| C  | -6.46256000 | 1.92164900  | 4.46892500  | H | -4.93230100 | -2.85861800 | -0.85571700 |
| C  | -5.67936400 | 3.01236500  | 4.80590900  | H | -4.93550800 | -4.35946500 | 0.06883600  |
| C  | -6.17593100 | 3.88530500  | 5.77356200  | H | -2.93093000 | 0.00561500  | 0.98827500  |
| C  | -7.40889700 | 3.67594500  | 6.37866700  | H | -4.70202600 | -3.13308700 | 2.19762200  |
| C  | -8.18678000 | 2.56587700  | 6.02222900  | H | -6.04521900 | -2.38903400 | 1.28797800  |
| C  | -7.69726600 | 1.68216300  | 5.05111200  | H | -2.48426000 | -1.47372000 | -0.99628700 |
| H  | -4.71759200 | 3.18869700  | 4.34438400  | O | -4.34335600 | -1.29010700 | 1.38531900  |
| H  | -7.77177000 | 4.37213000  | 7.12451700  | C | -6.50354000 | 2.06108800  | 4.62576200  |
| H  | -8.28041800 | 0.81799400  | 4.75599900  | C | -5.72107000 | 3.13920200  | 5.00352400  |
| N  | -9.44159300 | 2.37652300  | 6.57289100  | C | -6.25749000 | 4.02608700  | 5.93736300  |
| H  | -9.80913200 | 1.43711300  | 6.53647100  | C | -7.52666100 | 3.84132200  | 6.47142200  |
| H  | -9.61023600 | 2.82692600  | 7.46045100  | C | -8.30168700 | 2.74251200  | 6.07695500  |
| C  | -5.32814600 | 5.05832300  | 6.13537700  | C | -7.77374700 | 1.84574900  | 5.13733700  |
| O  | -4.25151700 | 5.29177000  | 5.64641700  | H | -4.73080500 | 3.29990500  | 4.60063800  |
| O  | -5.88469000 | 5.83951100  | 7.06864500  | H | -7.91839400 | 4.54744300  | 7.19310400  |
| H  | -5.28207700 | 6.57529500  | 7.24807000  | H | -8.35829000 | 0.99182200  | 4.81699100  |
| Cl | -5.87436200 | 0.79781000  | 3.26386200  | N | -9.58777600 | 2.57338800  | 6.55854900  |
|    |             |             |             | H | -9.96420900 | 1.63811300  | 6.50547200  |
|    |             |             |             | H | -9.79675600 | 3.02687700  | 7.43597300  |

**Neutral-Cation-Br oxocarbenium<sup>+</sup> DCE**

|    |             |            |            |
|----|-------------|------------|------------|
| C  | -5.40999200 | 5.18454600 | 6.34449100 |
| O  | -4.30031500 | 5.39280000 | 5.92297000 |
| O  | -6.00746700 | 5.98339400 | 7.23677300 |
| H  | -5.40111400 | 6.70678800 | 7.45048600 |
| Br | -5.80638700 | 0.81952600 | 3.36156600 |

**Neutral-Cation-I oxocarbenium<sup>+</sup> DCE**

|   |             |             |             |
|---|-------------|-------------|-------------|
| C | -4.50405000 | -3.38827400 | -0.00636600 |
| C | -2.97820200 | -3.41850900 | -0.04254200 |
| C | -2.44855100 | -1.98820800 | -0.04171800 |
| C | -3.23548200 | -1.05456600 | 0.76774100  |
| C | -4.96971900 | -2.65319400 | 1.22452100  |
| H | -1.40909200 | -1.89088200 | 0.29151800  |
| H | -2.59723900 | -3.95006200 | 0.83204800  |
| H | -2.61842800 | -3.93886800 | -0.92814500 |
| H | -4.90452000 | -2.90631500 | -0.90238800 |
| H | -4.91792100 | -4.39635400 | 0.03951300  |
| H | -2.90282400 | -0.02733400 | 0.91689700  |
| H | -4.69197700 | -3.14667300 | 2.15555600  |
| H | -6.02811400 | -2.40902200 | 1.22925400  |
| H | -2.45052000 | -1.53172400 | -1.04523000 |
| O | -4.32263300 | -1.31363300 | 1.32419500  |
| C | -6.59117300 | 2.21067400  | 4.81068800  |
| C | -5.81491600 | 3.29490600  | 5.18593500  |
| C | -6.36050800 | 4.19238400  | 6.10513700  |
| C | -7.63427300 | 4.01276200  | 6.62968700  |
| C | -8.40398600 | 2.90926300  | 6.24021000  |

|   |              |            |            |
|---|--------------|------------|------------|
| C | -7.86610200  | 2.00269000 | 5.31443700 |
| H | -4.82060300  | 3.45952800 | 4.79453200 |
| H | -8.03315100  | 4.72656700 | 7.33990700 |
| H | -8.45430300  | 1.14781000 | 5.00292300 |
| N | -9.69492800  | 2.74355500 | 6.71158600 |
| H | -10.06834200 | 1.80662000 | 6.66578700 |
| H | -9.91078500  | 3.20406900 | 7.58373900 |
| C | -5.51819400  | 5.35672300 | 6.50592000 |
| O | -4.40445700  | 5.56138500 | 6.09323900 |
| O | -6.12548400  | 6.16661200 | 7.38181600 |
| H | -5.52192300  | 6.89347300 | 7.59165000 |
| I | -5.79731600  | 0.81269300 | 3.41845900 |

**Neutral-Cation-Cl dimethyloxidanium<sup>+</sup> DCE**

|   |             |             |             |
|---|-------------|-------------|-------------|
| O | -0.23176500 | 0.32046700  | -0.00016900 |
| C | 1.24211200  | 0.30167200  | 0.01371600  |
| H | 1.52780600  | -0.74504200 | -0.00603800 |
| H | 1.60218900  | 0.85025100  | -0.85294400 |
| H | 1.52717800  | 0.77233200  | 0.94937000  |
| C | -0.86977700 | 1.64743800  | 0.05315500  |
| H | -0.56682500 | 2.21283700  | -0.82466600 |
| H | -1.93864100 | 1.46210300  | 0.08065300  |
| H | -0.52134000 | 2.09793200  | 0.97721300  |
| H | -0.60231300 | -0.23792300 | -0.70562700 |
| C | -1.61134000 | -1.69436500 | 4.21673300  |
| C | -1.19220800 | -1.11574900 | 5.40163800  |
| C | -1.64535000 | -1.68927200 | 6.58948100  |

|    |             |             |            |
|----|-------------|-------------|------------|
| C  | -2.48388600 | -2.79669600 | 6.58976700 |
| C  | -2.89333800 | -3.36901300 | 5.37774600 |
| C  | -2.44590500 | -2.80007400 | 4.17796700 |
| H  | -0.54152100 | -0.25257700 | 5.41793600 |
| H  | -2.82349600 | -3.21886000 | 7.52731400 |
| H  | -2.75219600 | -3.21869700 | 3.22684200 |
| N  | -3.77091100 | -4.43818700 | 5.36196700 |
| H  | -3.77188800 | -5.00370200 | 4.52563000 |
| H  | -3.81215500 | -4.99056100 | 6.20606700 |
| C  | -1.19292600 | -1.06350800 | 7.86631700 |
| O  | -0.46125800 | -0.10796500 | 7.92925400 |
| O  | -1.68420700 | -1.67290400 | 8.95172200 |
| H  | -1.35032700 | -1.21371300 | 9.73552300 |
| Cl | -1.07411500 | -1.00443200 | 2.69941900 |

**Neutral-Cation-Br dimethyloxidanium<sup>+</sup> DCE**

|   |             |             |             |
|---|-------------|-------------|-------------|
| O | -0.21501900 | 0.38066100  | -0.05882400 |
| C | 1.23878700  | 0.32129100  | 0.17969300  |
| H | 1.53293700  | -0.70161200 | -0.03407700 |
| H | 1.72436700  | 1.04186700  | -0.47310700 |
| H | 1.36769900  | 0.55949000  | 1.23107200  |
| C | -0.86640600 | 1.68020000  | 0.18716100  |
| H | -0.42744500 | 2.41796900  | -0.47989500 |
| H | -1.92336500 | 1.52328500  | -0.00103500 |
| H | -0.68060000 | 1.90372800  | 1.23318500  |
| H | -0.46208300 | 0.00503000  | -0.92140200 |
| C | -1.71335600 | -1.92385100 | 4.20731100  |

|    |             |             |            |
|----|-------------|-------------|------------|
| C  | -1.24662500 | -1.25952900 | 5.32803200 |
| C  | -1.66421500 | -1.73286900 | 6.57246300 |
| C  | -2.51357600 | -2.82551700 | 6.68802400 |
| C  | -2.97290200 | -3.48430200 | 5.53951400 |
| C  | -2.56084500 | -3.01813900 | 4.28328300 |
| H  | -0.58489200 | -0.40750700 | 5.26007100 |
| H  | -2.82430500 | -3.16978300 | 7.66653600 |
| H  | -2.90468900 | -3.51106900 | 3.38202500 |
| N  | -3.86405600 | -4.53712000 | 5.63871600 |
| H  | -3.90817600 | -5.16283000 | 4.84775100 |
| H  | -3.87800100 | -5.02421900 | 6.52275400 |
| C  | -1.16228600 | -1.01513100 | 7.78076400 |
| O  | -0.42539300 | -0.06225700 | 7.74483400 |
| O  | -1.61650700 | -1.53758000 | 8.92602200 |
| H  | -1.25279600 | -1.02344800 | 9.66096400 |
| Br | -1.17298200 | -1.31710700 | 2.48360800 |

**Neutral-Cation-I dimethyloxidanium<sup>+</sup> DCE**

|   |             |             |             |
|---|-------------|-------------|-------------|
| O | 0.03144000  | 0.26302500  | -0.15166300 |
| C | 1.34344600  | 0.38200400  | 0.51191900  |
| H | 1.82631300  | -0.58210200 | 0.38874600  |
| H | 1.89431000  | 1.19183700  | 0.03994400  |
| H | 1.11957000  | 0.58281900  | 1.55530200  |
| C | -0.83609300 | 1.45388300  | -0.08383600 |
| H | -0.32271400 | 2.28134400  | -0.56703500 |
| H | -1.75602700 | 1.18088200  | -0.59084600 |
| H | -1.00264900 | 1.62943900  | 0.97458000  |

|   |             |             |             |   |             |             |             |
|---|-------------|-------------|-------------|---|-------------|-------------|-------------|
| H | 0.11113200  | -0.07938200 | -1.05924000 | H | -1.29715500 | 0.45834700  | -1.60661900 |
| C | -1.87956800 | -2.17958600 | 4.27418600  | H | -1.98910000 | 0.95438700  | -0.10893800 |
| C | -1.30593200 | -1.48576300 | 5.32609800  | C | 1.31850100  | 5.17815100  | -0.72165200 |
| C | -1.65070000 | -1.88002700 | 6.62006100  | C | 0.13369000  | 5.79579100  | -1.08574800 |
| C | -2.53473400 | -2.92590400 | 6.85085400  | C | 0.04257300  | 7.19431300  | -1.04097900 |
| C | -3.10447100 | -3.61550100 | 5.77283800  | C | 2.33181400  | 7.27381300  | -0.26350700 |
| C | -2.76508900 | -3.22853500 | 4.46789400  | C | 2.43651400  | 5.88336100  | -0.30650300 |
| H | -0.61338500 | -0.66949600 | 5.17591700  | H | -0.71654000 | 5.20234600  | -1.40025400 |
| H | -2.78697600 | -3.20897100 | 7.86526700  | H | 3.34913200  | 5.37606900  | -0.02935300 |
| H | -3.20045800 | -3.75216100 | 3.62524800  | C | 1.08341700  | 0.18154000  | -2.21730600 |
| N | -4.03094900 | -4.61962200 | 5.98768200  | H | 2.11012300  | 0.05486000  | -2.54809900 |
| H | -4.16465700 | -5.27504400 | 5.23181000  | H | 0.50122900  | -0.67942800 | -2.55137600 |
| H | -3.99860500 | -5.06739100 | 6.89189800  | H | 0.68843700  | 1.09934200  | -2.65734300 |
| C | -1.02824800 | -1.13204000 | 7.75142800  | C | 1.15972900  | 7.92650600  | -0.62197300 |
| O | -0.25281100 | -0.21956400 | 7.61496800  | H | 1.12023600  | 9.00827300  | -0.57303700 |
| O | -1.41851700 | -1.57819400 | 8.95119700  | C | 3.48512200  | 8.11499100  | 0.17195500  |
| H | -0.97717300 | -1.04982900 | 9.63158700  | O | 3.46289000  | 9.31783600  | 0.23478700  |
| I | -1.38590900 | -1.62928400 | 2.27871900  | O | 4.56551000  | 7.39196400  | 0.49230300  |

**Neutral-Cation-Cl Me-gua<sup>+</sup> DCE**

|   |             |            |             |
|---|-------------|------------|-------------|
| C | 0.01225200  | 0.55994100 | -0.03909800 |
| N | 0.11177600  | 0.70853600 | 1.28258400  |
| N | 1.09130800  | 0.28094600 | -0.76247800 |
| N | -1.16922300 | 0.69780400 | -0.63625600 |
| H | -0.70030400 | 0.91831800 | 1.84124500  |
| H | 1.01353300  | 0.78714500 | 1.72627500  |
| H | 1.95488200  | 0.10228100 | -0.27158100 |

|   |             |             |             |
|---|-------------|-------------|-------------|
| H | -1.29715500 | 0.45834700  | -1.60661900 |
| H | -1.98910000 | 0.95438700  | -0.10893800 |
| C | 1.31850100  | 5.17815100  | -0.72165200 |
| C | 0.13369000  | 5.79579100  | -1.08574800 |
| C | 0.04257300  | 7.19431300  | -1.04097900 |
| C | 2.33181400  | 7.27381300  | -0.26350700 |
| C | 2.43651400  | 5.88336100  | -0.30650300 |
| H | -0.71654000 | 5.20234600  | -1.40025400 |
| H | 3.34913200  | 5.37606900  | -0.02935300 |
| C | 1.08341700  | 0.18154000  | -2.21730600 |
| H | 2.11012300  | 0.05486000  | -2.54809900 |
| H | 0.50122900  | -0.67942800 | -2.55137600 |
| H | 0.68843700  | 1.09934200  | -2.65734300 |
| C | 1.15972900  | 7.92650600  | -0.62197300 |
| H | 1.12023600  | 9.00827300  | -0.57303700 |
| C | 3.48512200  | 8.11499100  | 0.17195500  |
| O | 3.46289000  | 9.31783600  | 0.23478700  |
| O | 4.56551000  | 7.39196400  | 0.49230300  |
| H | 5.26833400  | 7.99971500  | 0.76316700  |

|    |             |            |             |
|----|-------------|------------|-------------|
| N  | -1.14767700 | 7.82934300 | -1.34714200 |
| H  | -1.78530300 | 7.32011100 | -1.94143600 |
| H  | -1.07646100 | 8.80420800 | -1.59987400 |
| Cl | 1.40556200  | 3.42927700 | -0.78702400 |

**Neutral-Cation-Br Me-gua<sup>+</sup> DCE**

|   |             |            |             |
|---|-------------|------------|-------------|
| C | -0.00975500 | 0.16134600 | -0.02915000 |
| N | 0.04011400  | 0.16725100 | 1.30253300  |





|   |             |            |             |   |            |            |             |
|---|-------------|------------|-------------|---|------------|------------|-------------|
| O | 4.62926500  | 7.59311900 | 0.42246400  | H | 1.50738600 | 0.64977300 | -2.35367200 |
| H | 5.33549400  | 8.21476200 | 0.64930100  | C | 1.19971500 | 7.69572600 | -0.60936900 |
| N | -1.11129100 | 7.93413800 | -1.35187000 | H | 1.25212300 | 8.77764700 | -0.64901500 |
| H | -1.75629200 | 7.39164800 | -1.90757800 | C | 3.66760200 | 7.70607100 | -0.56333100 |
| H | -1.04316200 | 8.89231500 | -1.66271800 | O | 3.73124300 | 8.90544400 | -0.60235100 |
| I | 1.46564300  | 3.18855300 | -0.58938700 | O | 4.72905200 | 6.90179800 | -0.52027100 |

**Cation-Neutral-Cl Me-gua TCM ModRedundant**

|    |             |             |             |
|----|-------------|-------------|-------------|
| C  | -0.36330800 | 0.19288300  | -0.32641800 |
| N  | -1.07220900 | 0.28988200  | 0.74195800  |
| N  | 1.01352100  | 0.16323300  | -0.37618600 |
| N  | -0.98490200 | 0.21855400  | -1.56409200 |
| H  | -0.47464500 | 0.36050800  | 1.56195000  |
| H  | 1.46109600  | -0.08333700 | 0.49280700  |
| H  | -0.57625400 | -0.35100300 | -2.29109600 |
| H  | -1.98449700 | 0.09681700  | -1.48555300 |
| C  | 1.11131700  | 4.91152400  | -0.50176400 |
| C  | -0.07628500 | 5.62932100  | -0.55388900 |
| C  | 0.00255200  | 7.01212700  | -0.60672600 |
| C  | 2.37557700  | 6.95053500  | -0.55930800 |
| C  | 2.34100900  | 5.56209400  | -0.50587000 |
| H  | -1.02797100 | 5.11151600  | -0.55251800 |
| H  | 3.25974700  | 4.99182000  | -0.46462300 |
| Cl | 1.06235700  | 3.18304200  | -0.42113900 |
| C  | 1.77244800  | -0.08452700 | -1.59060600 |
| H  | 2.83010800  | 0.03799700  | -1.36378900 |
| H  | 1.62235100  | -1.09262500 | -1.99289700 |

|   |             |            |             |
|---|-------------|------------|-------------|
| H | 5.53226200  | 7.44308800 | -0.52635200 |
| N | -1.25675400 | 7.78064600 | -0.68592700 |
| H | -1.63411300 | 7.78745900 | -1.64008900 |
| H | -1.97975000 | 7.39104800 | -0.07226400 |
| H | -1.11755500 | 8.75658000 | -0.40598800 |

A 10 9 3 120.0 F

A 9 3 1 90.0 F

**Cation-Neutral-Cl Me-gua DCE**

|   |             |             |             |
|---|-------------|-------------|-------------|
| C | -0.40305400 | 0.36563400  | -0.36857800 |
| N | -1.09833200 | 0.50078700  | 0.70761000  |
| N | 0.94266100  | 0.09240200  | -0.42311000 |
| N | -0.99661500 | 0.59616600  | -1.59730000 |
| H | -0.50580300 | 0.39774800  | 1.52779800  |
| H | 1.33964800  | -0.27688300 | 0.42662400  |
| H | -0.67168300 | 0.03969400  | -2.37497300 |
| H | -2.00375400 | 0.63463500  | -1.53362800 |
| C | 1.32917700  | 4.85235100  | -0.41061900 |
| C | 0.08199900  | 5.45671900  | -0.48245100 |
| C | 0.03703200  | 6.83934800  | -0.57782400 |

|                                         |             |             |             |                                      |             |             |             |
|-----------------------------------------|-------------|-------------|-------------|--------------------------------------|-------------|-------------|-------------|
| C                                       | 2.40822100  | 6.98924900  | -0.52363500 | H                                    | -0.70314500 | 0.08913200  | -2.32423900 |
| C                                       | 2.49787200  | 5.60535600  | -0.42925900 | H                                    | -2.03953100 | 0.51811100  | -1.39300800 |
| H                                       | -0.82103100 | 4.85818500  | -0.46764100 | C                                    | 1.28036000  | 4.85631200  | -0.39393400 |
| H                                       | 3.46230100  | 5.11859900  | -0.37004600 | C                                    | 0.04665400  | 5.48137400  | -0.50671300 |
| Cl                                      | 1.41636000  | 3.12474700  | -0.29955200 | C                                    | 0.02852100  | 6.86278300  | -0.62652500 |
| C                                       | 1.66557600  | -0.17401600 | -1.65549400 | C                                    | 2.40090900  | 6.97008100  | -0.52160700 |
| H                                       | 2.72155300  | -0.28238100 | -1.41547600 | C                                    | 2.46292300  | 5.58655900  | -0.39852200 |
| H                                       | 1.33182200  | -1.08984500 | -2.15544500 | H                                    | -0.86754200 | 4.90032400  | -0.50304800 |
| H                                       | 1.56238800  | 0.66804400  | -2.34285700 | H                                    | 3.41653200  | 5.08384000  | -0.30712000 |
| C                                       | 1.17055800  | 7.62451100  | -0.59993500 | Cl                                   | 1.33449700  | 3.12830800  | -0.24874700 |
| H                                       | 1.12807700  | 8.70487300  | -0.67423600 | C                                    | 1.67216000  | -0.02063400 | -1.69532700 |
| C                                       | 3.62847500  | 7.85407500  | -0.54871100 | H                                    | 2.74118600  | -0.05740400 | -1.49481700 |
| O                                       | 3.58933000  | 9.05352900  | -0.62666300 | H                                    | 1.39702400  | -0.91808800 | -2.25982000 |
| O                                       | 4.75671600  | 7.14861400  | -0.47606800 | H                                    | 1.47500200  | 0.86306300  | -2.30563200 |
| H                                       | 5.50994200  | 7.75710100  | -0.49809600 | C                                    | 1.17735700  | 7.62617400  | -0.63779300 |
| N                                       | -1.28553700 | 7.48443500  | -0.67968300 | H                                    | 1.15506400  | 8.70545200  | -0.73336700 |
| H                                       | -1.74085200 | 7.27301500  | -1.57484900 | C                                    | 3.63813100  | 7.81003100  | -0.53493300 |
| H                                       | -1.91668800 | 7.17501900  | 0.06646600  | O                                    | 3.62611500  | 9.00850400  | -0.63911600 |
| H                                       | -1.21313800 | 8.50393100  | -0.61075700 | O                                    | 4.75039400  | 7.08489600  | -0.42029400 |
| <b>Cation-Neutral-Cl Me-gua Acetone</b> |             |             |             | H                                    | 5.51581600  | 7.67823300  | -0.43700500 |
| C                                       | -0.38129600 | 0.26472100  | -0.30539200 | N                                    | -1.27832800 | 7.53020200  | -0.76387100 |
| N                                       | -1.04315800 | 0.26758900  | 0.80137700  | H                                    | -1.70947100 | 7.33563400  | -1.67466400 |
| N                                       | 0.97419900  | 0.08423400  | -0.42520000 | H                                    | -1.93776500 | 7.22491500  | -0.04077200 |
| N                                       | -1.03499700 | 0.55207000  | -1.49030200 | H                                    | -1.19180100 | 8.54742800  | -0.68140900 |
| H                                       | -0.41411900 | 0.13860400  | 1.58999200  | <b>Cation-Neutral-Cl Me-gua DMSO</b> |             |             |             |
| H                                       | 1.43152700  | -0.30680600 | 0.38342200  | C                                    | 0.13512000  | 0.14034200  | 0.11703300  |



|   |             |            |             |   |            |            |             |
|---|-------------|------------|-------------|---|------------|------------|-------------|
| O | 3.44986400  | 9.03505100 | 0.30864900  | H | 1.52487300 | 0.57362900 | -2.40775300 |
| O | 4.51498900  | 7.09931500 | 0.66704600  | C | 1.17647600 | 7.91815400 | -0.59569100 |
| H | 5.21898100  | 7.69104400 | 0.97083000  | H | 1.14024100 | 9.00001500 | -0.65531700 |
| N | -1.08563200 | 7.57935700 | -1.58184000 | C | 3.63329400 | 8.14212600 | -0.52938200 |
| H | -1.30944500 | 7.32335000 | -2.54935100 | O | 3.59266800 | 9.34172100 | -0.58948500 |
| H | -1.90023800 | 7.34424700 | -1.00459600 | O | 4.76010200 | 7.43423200 | -0.46061800 |
| H | -0.98192800 | 8.59797600 | -1.55675800 | H | 5.51412400 | 8.04206000 | -0.46701500 |

**Cation-Neutral-Br Me-gua TCM**

|   |             |             |             |
|---|-------------|-------------|-------------|
| C | -0.40292400 | 0.41314000  | -0.36577100 |
| N | -1.08857500 | 0.58692600  | 0.70673100  |
| N | 0.96360500  | 0.20814000  | -0.42003200 |
| N | -1.01708700 | 0.53871100  | -1.59903600 |
| H | -0.48594800 | 0.56123700  | 1.52573900  |
| H | 1.35774200  | -0.14175000 | 0.44048500  |
| H | -0.67918600 | -0.05339300 | -2.34375100 |
| H | -2.02408100 | 0.54284200  | -1.52294500 |
| C | 1.32607200  | 5.13774300  | -0.44774100 |
| C | 0.08171000  | 5.75050600  | -0.51223100 |
| C | 0.04215900  | 7.13460600  | -0.58820400 |
| C | 2.41159700  | 7.27724200  | -0.52362900 |
| C | 2.49616500  | 5.89131700  | -0.45163100 |
| H | -0.82639300 | 5.15910400  | -0.50699400 |
| H | 3.46170300  | 5.40592100  | -0.39790800 |
| C | 1.65582500  | -0.18895900 | -1.63778200 |
| H | 2.71935600  | -0.26137800 | -1.41788900 |
| H | 1.31736500  | -1.15591400 | -2.02641100 |

|    |             |            |             |
|----|-------------|------------|-------------|
| H  | -1.28117000 | 7.78389300 | -0.68822400 |
| H  | -1.73024600 | 7.58679800 | -1.58988600 |
| H  | -1.91682600 | 7.46204300 | 0.04879800  |
| H  | -1.20691200 | 8.80196100 | -0.60170200 |
| Br | 1.40676700  | 3.25296600 | -0.36311400 |

**Cation-Neutral-Br Me-gua DCE**

|   |             |             |             |
|---|-------------|-------------|-------------|
| C | -0.38007600 | 0.26487200  | -0.29802000 |
| N | -1.01555200 | 0.35737000  | 0.81702000  |
| N | 0.99286800  | 0.23373500  | -0.43373500 |
| N | -1.07949100 | 0.30120300  | -1.49035000 |
| H | -0.36233700 | 0.42195000  | 1.59397800  |
| H | 1.48433100  | -0.04848100 | 0.40118800  |
| H | -0.71951700 | -0.25366600 | -2.25349400 |
| H | -2.07393300 | 0.18886400  | -1.35464400 |
| C | 1.23733600  | 5.16890200  | -0.48771500 |
| C | 0.01929400  | 5.82851300  | -0.57981900 |
| C | 0.03276700  | 7.21403500  | -0.63848400 |
| C | 2.40469100  | 7.26465900  | -0.51394400 |
| C | 2.43488300  | 5.87530200  | -0.45433000 |

|                                         |             |             |             |                                      |             |             |             |
|-----------------------------------------|-------------|-------------|-------------|--------------------------------------|-------------|-------------|-------------|
| H                                       | -0.91042700 | 5.27298400  | -0.60588300 | C                                    | 1.20837300  | 5.18248000  | -0.57635800 |
| H                                       | 3.37954300  | 5.35315400  | -0.38023900 | C                                    | 0.02244900  | 5.85430600  | -0.84056100 |
| C                                       | 1.66518200  | -0.04638600 | -1.69378300 | C                                    | 0.05395900  | 7.24106700  | -0.86683700 |
| H                                       | 2.73750300  | 0.05577600  | -1.53682200 | C                                    | 2.38168700  | 7.26571200  | -0.38660200 |
| H                                       | 1.46564700  | -1.05540500 | -2.07043100 | C                                    | 2.39208900  | 5.87549100  | -0.34802800 |
| H                                       | 1.36660100  | 0.68508300  | -2.44703600 | H                                    | -0.89702000 | 5.30936000  | -1.01781800 |
| C                                       | 1.19701600  | 7.95275600  | -0.60824500 | H                                    | 3.31036800  | 5.34242600  | -0.14078000 |
| H                                       | 1.19959700  | 9.03569400  | -0.65620300 | C                                    | 1.36890200  | 0.07372600  | -2.01421100 |
| C                                       | 3.65957000  | 8.07817700  | -0.47861500 | H                                    | 2.43461600  | 0.22476200  | -2.17591600 |
| O                                       | 3.67205600  | 9.27993500  | -0.52278900 | H                                    | 1.09799300  | -0.91654700 | -2.39570400 |
| O                                       | 4.75554000  | 7.32474700  | -0.39324900 | H                                    | 0.83354400  | 0.83822300  | -2.58063200 |
| H                                       | 5.53291200  | 7.90220800  | -0.37176700 | C                                    | 1.20641600  | 7.96617700  | -0.64737600 |
| N                                       | -1.25869700 | 7.91622700  | -0.75895400 | H                                    | 1.22095500  | 9.04914900  | -0.67090800 |
| H                                       | -1.65612800 | 7.82066000  | -1.70020700 | C                                    | 3.62239200  | 8.06542700  | -0.14789900 |
| H                                       | -1.95036500 | 7.55494000  | -0.09444900 | O                                    | 3.65414500  | 9.26759000  | -0.18124300 |
| H                                       | -1.15877200 | 8.91821800  | -0.57214300 | O                                    | 4.68433000  | 7.30088000  | 0.10512500  |
| Br                                      | 1.25045200  | 3.27961200  | -0.40522600 | H                                    | 5.45389500  | 7.87082000  | 0.25009300  |
| <b>Cation-Neutral-Br Me-gua Acetone</b> |             |             |             | N                                    | -1.19963000 | 7.96219900  | -1.15397700 |
| C                                       | -0.16313000 | 0.15327200  | -0.04600500 | H                                    | -1.45103300 | 7.90315500  | -2.14688700 |
| N                                       | -0.42914500 | 0.11731300  | 1.21356100  | H                                    | -1.98696900 | 7.58761300  | -0.61445800 |
| N                                       | 1.10027300  | 0.22622700  | -0.59207300 | H                                    | -1.12314000 | 8.95669400  | -0.92047600 |
| N                                       | -1.19537200 | 0.22988000  | -0.96195200 | Br                                   | 1.20712200  | 3.29129900  | -0.52044700 |
| H                                       | 0.42867500  | 0.16180800  | 1.75827000  | <b>Cation-Neutral-Br Me-gua DMSO</b> |             |             |             |
| H                                       | 1.84027600  | -0.05936400 | 0.03153000  | C                                    | 0.07105700  | 0.17745300  | 0.08193100  |
| H                                       | -1.05965100 | -0.22751000 | -1.85192200 | N                                    | 0.16899400  | 0.15587700  | 1.36661000  |
| H                                       | -2.09487300 | 0.03200300  | -0.54789700 | N                                    | 1.13175700  | 0.21147700  | -0.79643800 |

N -1.17439900 0.27999600 -0.50777800  
 H 1.14672200 0.17685400 1.64652100  
 H 2.01048200 -0.08700800 -0.40020600  
 H -1.30665800 -0.18130800 -1.39626900  
 H -1.92732700 0.10931300 0.14315100  
 C 1.26946200 5.18156300 -0.68658800  
 C 0.11512600 5.83854200 -1.08889100  
 C 0.11037100 7.22509900 -1.05290200  
 C 2.34349600 7.27851900 -0.23993800  
 C 2.38908500 5.88872300 -0.26212900  
 H -0.75538000 5.28373400 -1.41719200  
 H 3.28414100 5.36596400 0.04753000  
 C 0.98722300 0.03632800 -2.23392900  
 H 1.96680200 0.16238300 -2.69135800  
 H 0.60288800 -0.95258100 -2.50580700  
 H 0.32653700 0.80391400 -2.64136900  
 C 1.19726000 7.96449600 -0.63615000  
 H 1.18358800 9.04741500 -0.60978600  
 C 3.51459200 8.09243700 0.20869300  
 O 3.50975900 9.29480900 0.25581400  
 O 4.56114700 7.34064300 0.54908500  
 H 5.28434900 7.91929900 0.83227000  
 N -1.11488700 7.92460100 -1.47780300  
 H -1.36815300 7.69123900 -2.44369500  
 H -1.91545300 7.68447300 -0.88321100  
 H -1.00123900 8.94157800 -1.43502000  
 Br 1.31115400 3.28980600 -0.71353400

**Cation-Neutral-Br Me-gua Water**

C 0.25954400 0.11319800 0.15375100  
 N 0.60723800 0.01601200 1.39102800  
 N 1.12637500 0.22169700 -0.91082400  
 N -1.07827800 0.22448700 -0.17352100  
 H 1.62049400 0.03789300 1.47636400  
 H 2.07031300 -0.07521100 -0.71337200  
 H -1.37798700 -0.18327800 -1.04730100  
 H -1.68719400 -0.00231700 0.59939400  
 C 1.25477700 5.18518200 -0.70944900  
 C 0.15224300 5.85178900 -1.22493000  
 C 0.15644200 7.23831600 -1.19115400  
 C 2.29855400 7.27336400 -0.16162100  
 C 2.33259800 5.88298900 -0.17614900  
 H -0.68468800 5.30540300 -1.64219100  
 H 3.18812100 5.35363700 0.22146300  
 C 0.70330100 0.12888400 -2.30029900  
 H 1.57157800 0.30538900 -2.93234400  
 H 0.28380000 -0.85077200 -2.55284500  
 H -0.03291600 0.90429800 -2.52042200  
 C 1.20394200 7.96880200 -0.67060400  
 H 1.19798500 9.05205500 -0.65113000  
 C 3.43035000 8.07708900 0.39333100  
 O 3.44174000 9.28012600 0.41946600  
 O 4.42278600 7.31585200 0.85336000  
 H 5.12466000 7.88810700 1.19676800

|    |             |            |             |
|----|-------------|------------|-------------|
| N  | -1.01347100 | 7.94730200 | -1.73770900 |
| H  | -1.19850500 | 7.67842200 | -2.70987600 |
| H  | -1.86269600 | 7.75162900 | -1.19672400 |
| H  | -0.87643300 | 8.96216100 | -1.72753100 |
| Br | 1.28781900  | 3.29313600 | -0.74331700 |

**Cation-Neutral-I Me-gua TCM**

|   |             |             |             |
|---|-------------|-------------|-------------|
| C | -0.38134600 | 0.24350800  | -0.29988800 |
| N | -1.01665800 | 0.32722100  | 0.81055800  |
| N | 0.99899800  | 0.36453900  | -0.44211100 |
| N | -1.07650200 | 0.14672900  | -1.48882300 |
| H | -0.37542000 | 0.49688200  | 1.58166200  |
| H | 1.49609900  | 0.12214100  | 0.40405100  |
| H | -0.66104500 | -0.40025600 | -2.22832800 |
| H | -2.05601300 | -0.05325700 | -1.34599600 |
| C | 1.18687700  | 5.50976000  | -0.51964400 |
| C | -0.01467300 | 6.20465900  | -0.59432800 |
| C | 0.02791600  | 7.59085600  | -0.63114400 |
| C | 2.39854000  | 7.59025100  | -0.52328300 |
| C | 2.39608600  | 6.19916500  | -0.48548500 |
| H | -0.96015800 | 5.67544700  | -0.62301100 |
| H | 3.33536500  | 5.66464600  | -0.42707300 |
| C | 1.68653000  | -0.01646700 | -1.67196300 |
| H | 2.74961500  | 0.17752500  | -1.53947800 |
| H | 1.55460200  | -1.07366700 | -1.92551100 |
| H | 1.33609500  | 0.60235200  | -2.49972900 |
| C | 1.20618700  | 8.30569400  | -0.59684400 |

|   |             |            |             |
|---|-------------|------------|-------------|
| H | 1.23211100  | 9.38890200 | -0.62644400 |
| C | 3.66952700  | 8.37905600 | -0.48602800 |
| O | 3.70346700  | 9.58035000 | -0.51036500 |
| O | 4.75165600  | 7.60319100 | -0.42446200 |
| H | 5.53936500  | 8.16626900 | -0.40216200 |
| N | -1.24819700 | 8.32979400 | -0.73854400 |
| H | -1.58966600 | 8.35064300 | -1.70576300 |
| H | -1.98278200 | 7.90723300 | -0.16195000 |
| H | -1.14593700 | 9.30159300 | -0.42984500 |
| I | 1.16032600  | 3.39087300 | -0.45645900 |

**Cation-Neutral-I Me-gua DCE**

|   |             |             |             |
|---|-------------|-------------|-------------|
| C | -0.21814800 | 0.19658000  | -0.10463600 |
| N | -0.54811500 | 0.25326900  | 1.13517100  |
| N | 1.07191800  | 0.36136600  | -0.59330700 |
| N | -1.19329500 | 0.08300500  | -1.07420700 |
| H | 0.26782900  | 0.43693600  | 1.71417900  |
| H | 1.78029300  | 0.15144900  | 0.09639900  |
| H | -0.96466800 | -0.43332400 | -1.91090400 |
| H | -2.09655900 | -0.15522600 | -0.69089500 |
| C | 1.19297700  | 5.52513400  | -0.60675400 |
| C | 0.00853300  | 6.22023300  | -0.81689900 |
| C | 0.04933300  | 7.60736600  | -0.81185900 |
| C | 2.38791300  | 7.60356000  | -0.40225400 |
| C | 2.38579400  | 6.21196500  | -0.39929900 |
| H | -0.92618300 | 5.69593600  | -0.97888200 |
| H | 3.31136500  | 5.67622700  | -0.23379100 |

|   |             |             |             |
|---|-------------|-------------|-------------|
| C | 1.43602100  | 0.00696000  | -1.96142600 |
| H | 2.49190400  | 0.23248700  | -2.10003100 |
| H | 1.27397400  | -1.05284500 | -2.18393500 |
| H | 0.86996800  | 0.61705000  | -2.66742900 |
| C | 1.21187800  | 8.32016800  | -0.60912500 |
| H | 1.23546400  | 9.40353200  | -0.60487600 |
| C | 3.64181300  | 8.38856000  | -0.18469200 |
| O | 3.68225600  | 9.59074300  | -0.19450000 |
| O | 4.70543400  | 7.61136800  | 0.01993300  |
| H | 5.48266800  | 8.17365700  | 0.15294000  |
| N | -1.20766100 | 8.34338100  | -1.05031200 |
| H | -1.48677200 | 8.30236400  | -2.03659200 |
| H | -1.98210200 | 7.96570100  | -0.49446700 |
| H | -1.11634600 | 9.33332000  | -0.80332200 |
| I | 1.17347600  | 3.40471000  | -0.59261600 |

**Cation-Neutral-I Me-gua Acetone**

|   |             |            |             |
|---|-------------|------------|-------------|
| C | -0.28982700 | 0.17476200 | -0.17892000 |
| N | -0.77721100 | 0.11993400 | 1.00877800  |
| N | 1.05377000  | 0.33965400 | -0.48835900 |
| N | -1.12249900 | 0.07600600 | -1.27238600 |
| H | -0.03344700 | 0.12552000 | 1.70227600  |
| H | 1.65739200  | 0.14806800 | 0.29946200  |
| H | -0.84085900 | 0.54014200 | -2.12309500 |
| H | -2.09806000 | 0.20007200 | -1.04457100 |
| C | 1.19346100  | 5.50462300 | -0.57189500 |
| C | -0.00726000 | 6.18715200 | -0.71700400 |

|   |             |             |             |
|---|-------------|-------------|-------------|
| C | 0.02167900  | 7.57433200  | -0.74271100 |
| C | 2.38213200  | 7.59392800  | -0.48490900 |
| C | 2.39203200  | 6.20246100  | -0.45678500 |
| H | -0.94675700 | 5.65487100  | -0.80643200 |
| H | 3.33060600  | 5.67624900  | -0.34264500 |
| C | 1.60177400  | -0.08372800 | -1.77614800 |
| H | 2.68594500  | -0.00533200 | -1.71977800 |
| H | 1.32919800  | -1.11190300 | -2.02749500 |
| H | 1.26921600  | 0.58093800  | -2.57621800 |
| C | 1.18924200  | 8.29872200  | -0.62910800 |
| H | 1.20292000  | 9.38219600  | -0.64507200 |
| C | 3.64199800  | 8.38881900  | -0.35934200 |
| O | 3.67381900  | 9.59161700  | -0.37182300 |
| O | 4.72375300  | 7.62000800  | -0.23227200 |
| H | 5.50412900  | 8.18807100  | -0.15265600 |
| N | -1.25587200 | 8.29197800  | -0.90865400 |
| H | -1.64455600 | 8.16358100  | -1.84927600 |
| H | -1.96160800 | 7.96982900  | -0.23846000 |
| H | -1.14238000 | 9.29951900  | -0.76480400 |
| I | 1.18823400  | 3.38354400  | -0.51808600 |

**Cation-Neutral-I Me-gua DMSO**

|   |             |             |             |
|---|-------------|-------------|-------------|
| C | -0.03744800 | 0.13237100  | 0.02940300  |
| N | -0.12064300 | -0.03834100 | 1.30035900  |
| N | 1.13838600  | 0.31956100  | -0.68323500 |
| N | -1.18053700 | 0.15108900  | -0.74231500 |
| H | 0.80530400  | -0.11846400 | 1.71320200  |



|   |             |             |             |   |             |             |             |
|---|-------------|-------------|-------------|---|-------------|-------------|-------------|
| H | 1.96070200  | 0.07911200  | -0.14659800 | C | -0.03428900 | 0.12877800  | 0.03050800  |
| H | -1.16733600 | 0.72585600  | -1.57276900 | N | -0.11320300 | -0.04361800 | 1.30175700  |
| H | -2.02385000 | 0.25511100  | -0.19661100 | N | 1.13883400  | 0.31751200  | -0.68548500 |
| C | 1.21100800  | 5.49809600  | -0.64879000 | N | -1.17998400 | 0.14743700  | -0.73728700 |
| C | 0.03980000  | 6.17195900  | -0.97149200 | H | 0.81430600  | -0.12282200 | 1.71126700  |
| C | 0.05598100  | 7.55989300  | -0.96037000 | H | 1.96345400  | 0.07722000  | -0.15234300 |
| C | 2.34618100  | 7.59354200  | -0.32838500 | H | -1.16956900 | 0.72232400  | -1.56773800 |
| C | 2.36762500  | 6.20197600  | -0.32772600 | H | -2.02149500 | 0.25195400  | -0.18887300 |
| H | -0.86546700 | 5.63189200  | -1.22375000 | C | 1.20985700  | 5.49913700  | -0.64757900 |
| H | 3.28105400  | 5.67914300  | -0.07666200 | C | 0.03962400  | 6.17327700  | -0.97324400 |
| C | 1.23412600  | -0.02197400 | -2.10244500 | C | 0.05644500  | 7.56120300  | -0.96278200 |
| H | 2.27908200  | 0.05950500  | -2.39568800 | C | 2.34539400  | 7.59395400  | -0.32561900 |
| H | 0.88084600  | -1.03508700 | -2.31044500 | C | 2.36618400  | 6.20234700  | -0.32433300 |
| H | 0.66843600  | 0.68534800  | -2.71218900 | H | -0.86530900 | 5.63353700  | -1.22731500 |
| C | 1.18289100  | 8.29018300  | -0.64606700 | H | 3.27875500  | 5.67905100  | -0.07116900 |
| H | 1.18587800  | 9.37355300  | -0.64066200 | C | 1.22981500  | -0.01951100 | -2.10603200 |
| C | 3.56060800  | 8.39677500  | 0.00945300  | H | 2.27364200  | 0.06354100  | -2.40268900 |
| O | 3.58086000  | 9.60009300  | 0.02036800  | H | 0.87644200  | -1.03221200 | -2.31591200 |
| O | 4.61699900  | 7.63570900  | 0.29614000  | H | 0.66150100  | 0.68929400  | -2.71156900 |
| H | 5.36933900  | 8.20955600  | 0.50292600  | C | 1.18310800  | 8.29093800  | -0.64613900 |
| N | -1.18238500 | 8.27655700  | -1.31571600 | H | 1.18636300  | 9.37427800  | -0.64121700 |
| H | -1.36361100 | 8.24247700  | -2.32472600 | C | 3.55955800  | 8.39652000  | 0.01435200  |
| H | -2.00054200 | 7.87911000  | -0.84350000 | O | 3.58056000  | 9.59989900  | 0.02563400  |
| H | -1.13540600 | 9.26478500  | -1.05070600 | O | 4.61525600  | 7.63499500  | 0.30250900  |
| I | 1.23308500  | 3.37624400  | -0.63939400 | H | 5.36752800  | 8.20851300  | 0.51048800  |
|   |             |             |             | N | -1.18041200 | 8.27839500  | -1.32136100 |
|   |             |             |             | H | -1.35835100 | 8.24559900  | -2.33099800 |

**Cation-Neutral-I Me-gua Water**

|   |             |            |             |
|---|-------------|------------|-------------|
| H | -2.00020500 | 7.88052000 | -0.85239000 |
| H | -1.13428000 | 9.26630700 | -1.05506000 |
| I | 1.23143500  | 3.37726600 | -0.63776900 |

**Cation-Cation-Cl Me-gua<sup>+</sup> TCM**

|    |             |             |             |
|----|-------------|-------------|-------------|
| C  | 0.13756000  | -0.21602600 | 0.09866900  |
| N  | 0.38934700  | -0.19151300 | 1.40784800  |
| N  | 1.07873900  | 0.14522500  | -0.76790200 |
| N  | -1.07054000 | -0.56643400 | -0.33717000 |
| H  | -0.27554900 | -0.55570000 | 2.07181300  |
| H  | 1.29229700  | 0.08601900  | 1.75922300  |
| H  | 2.00383200  | 0.32277000  | -0.40553900 |
| H  | -1.25607900 | -0.69327100 | -1.31942300 |
| H  | -1.79755900 | -0.82999700 | 0.30977200  |
| C  | 0.96314100  | 5.05629900  | -0.68839000 |
| C  | -0.07335400 | 5.84471500  | -1.16660100 |
| C  | 0.11607800  | 7.21958900  | -1.16878000 |
| C  | 2.29325300  | 6.99696000  | -0.24211700 |
| C  | 2.14814600  | 5.61535500  | -0.22397900 |
| H  | -0.99182100 | 5.39347000  | -1.52355100 |
| H  | 2.94460300  | 4.98388700  | 0.14666700  |
| Cl | 0.77656900  | 3.32866200  | -0.67240000 |
| C  | 0.89275900  | 0.15611900  | -2.21531500 |
| H  | 1.77763900  | 0.60319400  | -2.65990100 |
| H  | 0.77686900  | -0.85563400 | -2.60872900 |
| H  | 0.02948400  | 0.76739800  | -2.48375200 |
| C  | 1.27353400  | 7.81754600  | -0.71799800 |

|   |             |            |             |
|---|-------------|------------|-------------|
| H | 1.41321200  | 8.89271800 | -0.72261900 |
| C | 3.54128300  | 7.66659900 | 0.24531700  |
| O | 3.68597200  | 8.85838300 | 0.25391900  |
| O | 4.45756600  | 6.79396300 | 0.66139300  |
| H | 5.23937200  | 7.27953300 | 0.96426400  |
| N | -0.96964400 | 8.07647500 | -1.68444800 |
| H | -1.12174500 | 7.93736600 | -2.68975000 |
| H | -1.85814500 | 7.89341900 | -1.20679900 |
| H | -0.75346500 | 9.06855600 | -1.54681700 |

**Cation-Cation-Cl Me-gua<sup>+</sup> DCE**

|   |             |             |             |
|---|-------------|-------------|-------------|
| C | 0.01725300  | 0.11130100  | -0.00946100 |
| N | 0.08025000  | 0.16386100  | 1.32136500  |
| N | 1.12850500  | -0.01746900 | -0.72733700 |
| N | -1.15901200 | 0.22700000  | -0.62145600 |
| H | -0.75869900 | 0.15654900  | 1.87987500  |
| H | 0.95986800  | 0.05943400  | 1.80189100  |
| H | 1.99604700  | -0.16106400 | -0.23113500 |
| H | -1.24328900 | 0.12373300  | -1.62005500 |
| H | -2.00887500 | 0.33940400  | -0.09142300 |
| C | 1.20603700  | 4.89578000  | -0.66094100 |
| C | 0.04032400  | 5.56169100  | -1.00983600 |
| C | 0.06075500  | 6.94847500  | -0.98573100 |
| C | 2.33408700  | 6.97416800  | -0.29019800 |
| C | 2.35749100  | 5.58440300  | -0.30048700 |
| H | -0.85038600 | 5.01083700  | -1.28819000 |
| H | 3.25623400  | 5.04601200  | -0.03082900 |

|                                                    |             |             |             |                                                 |             |             |             |
|----------------------------------------------------|-------------|-------------|-------------|-------------------------------------------------|-------------|-------------|-------------|
| Cl                                                 | 1.22564300  | 3.15749500  | -0.66969400 | C                                               | 0.07218400  | 5.52078000  | -1.00564700 |
| C                                                  | 1.14728500  | -0.06584700 | -2.18543800 | C                                               | 0.06557600  | 6.90775000  | -0.97449300 |
| H                                                  | 2.18333100  | -0.14295600 | -2.50176100 | C                                               | 2.34076300  | 6.97286900  | -0.28482700 |
| H                                                  | 0.60378300  | -0.93694300 | -2.55688400 | C                                               | 2.39109500  | 5.58387600  | -0.30339100 |
| H                                                  | 0.72664100  | 0.85005700  | -2.60548300 | H                                               | -0.80819800 | 4.95379800  | -1.28417500 |
| C                                                  | 1.18033200  | 7.67410500  | -0.63537900 | H                                               | 3.30043500  | 5.06069600  | -0.03984900 |
| H                                                  | 1.18667300  | 8.75790400  | -0.62169000 | Cl                                              | 1.30486200  | 3.13846800  | -0.68206100 |
| C                                                  | 3.53881900  | 7.77530600  | 0.09345500  | C                                               | 1.13642500  | -0.07508700 | -2.18865700 |
| O                                                  | 3.55268600  | 8.97683800  | 0.11927900  | H                                               | 2.17263400  | -0.16799800 | -2.50020000 |
| O                                                  | 4.58373100  | 7.00845300  | 0.40134200  | H                                               | 0.58178100  | -0.93963400 | -2.55856100 |
| H                                                  | 5.33089600  | 7.57639800  | 0.64129200  | H                                               | 0.73008900  | 0.84455000  | -2.61440500 |
| N                                                  | -1.16775100 | 7.66999100  | -1.36541000 | C                                               | 1.17247900  | 7.65191100  | -0.62218600 |
| H                                                  | -1.32144000 | 7.65062100  | -2.37980900 | H                                               | 1.15795200  | 8.73517000  | -0.60139400 |
| H                                                  | -1.99755300 | 7.26611200  | -0.91935400 | C                                               | 3.53133200  | 7.79385800  | 0.09786700  |
| H                                                  | -1.12631700 | 8.65399200  | -1.08361300 | O                                               | 3.52414700  | 8.99590900  | 0.13215200  |
| <b>Cation-Cation-Cl Me-gua<sup>+</sup> Acetone</b> |             |             |             | O                                               | 4.59330200  | 7.04608100  | 0.39495300  |
| C                                                  | 0.00197200  | 0.14488000  | -0.01908500 | H                                               | 5.33006500  | 7.62766400  | 0.63417800  |
| N                                                  | 0.06024600  | 0.20118700  | 1.31125900  | N                                               | -1.17535900 | 7.60904000  | -1.34892500 |
| N                                                  | 1.11264700  | -0.01925900 | -0.73122700 | H                                               | -1.33619100 | 7.58090100  | -2.36182400 |
| N                                                  | -1.16831500 | 0.28716300  | -0.63664700 | H                                               | -1.99707600 | 7.19764300  | -0.89487500 |
| H                                                  | -0.77966100 | 0.24757800  | 1.86609400  | H                                               | -1.14605200 | 8.59568500  | -1.07506200 |
| H                                                  | 0.93710000  | 0.09961400  | 1.79716700  | <b>Cation-Cation-Cl Me-gua<sup>+</sup> DMSO</b> |             |             |             |
| H                                                  | 1.97404900  | -0.18248000 | -0.23041300 | C                                               | -0.12511500 | 0.18853800  | -0.09293600 |
| H                                                  | -1.25255400 | 0.17781300  | -1.63453700 | N                                               | -0.20926400 | 0.13944500  | 1.23615800  |
| H                                                  | -2.01607000 | 0.42948500  | -0.11048200 | N                                               | 1.04113400  | -0.02292400 | -0.69495100 |
| C                                                  | 1.25169200  | 4.87573100  | -0.66384100 | N                                               | -1.20441300 | 0.47341300  | -0.81814900 |

|    |             |             |             |
|----|-------------|-------------|-------------|
| H  | -1.08676100 | 0.28947000  | 1.70772200  |
| H  | 0.61251300  | 0.00848300  | 1.80468900  |
| H  | 1.82116600  | -0.30622700 | -0.12082000 |
| H  | -1.18815000 | 0.41194300  | -1.82380900 |
| H  | -2.09729500 | 0.63007900  | -0.37657100 |
| C  | 1.38613400  | 4.82219900  | -0.49789900 |
| C  | 0.16114200  | 5.38769500  | -0.81842400 |
| C  | 0.08892000  | 6.77133000  | -0.88707400 |
| C  | 2.39179400  | 6.98778000  | -0.33356600 |
| C  | 2.50768600  | 5.60484100  | -0.25447500 |
| H  | -0.70439500 | 4.76407500  | -1.00766000 |
| H  | 3.45411800  | 5.14364300  | -0.00597900 |
| Cl | 1.51919300  | 3.09292500  | -0.39732600 |
| C  | 1.22997700  | 0.04055800  | -2.13915300 |
| H  | 2.29040600  | -0.08412100 | -2.34005200 |
| H  | 0.68134900  | -0.75568200 | -2.64598700 |
| H  | 0.91885500  | 1.01534100  | -2.52005800 |
| C  | 1.17572000  | 7.58761000  | -0.65237500 |
| H  | 1.10785300  | 8.66769500  | -0.70658800 |
| C  | 3.56039800  | 7.88504700  | -0.07725900 |
| O  | 3.50017400  | 9.08540200  | -0.13015200 |
| O  | 4.66958000  | 7.20784100  | 0.21654300  |
| H  | 5.38986000  | 7.83597300  | 0.37460600  |
| N  | -1.20819400 | 7.38558400  | -1.21941400 |
| H  | -1.55388700 | 7.07662400  | -2.13427300 |
| H  | -1.92640300 | 7.15406200  | -0.52437900 |
| H  | -1.14074500 | 8.40699900  | -1.25348500 |

**Cation-Cation-Cl Me-gua<sup>+</sup> Water**

|    |             |             |             |
|----|-------------|-------------|-------------|
| C  | -0.12799300 | 0.19840900  | -0.09469600 |
| N  | -0.20926800 | 0.13707300  | 1.23421000  |
| N  | 1.03402800  | -0.02082500 | -0.70219000 |
| N  | -1.20646800 | 0.50098800  | -0.81380300 |
| H  | -1.08328800 | 0.29668000  | 1.70913500  |
| H  | 0.61342500  | -0.00114100 | 1.79966600  |
| H  | 1.81321700  | -0.31664700 | -0.13315000 |
| H  | -1.19393500 | 0.45056400  | -1.82008900 |
| H  | -2.09512100 | 0.66817300  | -0.36771800 |
| C  | 1.39731700  | 4.81272600  | -0.47881500 |
| C  | 0.17054700  | 5.36979000  | -0.80723800 |
| C  | 0.09233800  | 6.75242400  | -0.88821400 |
| C  | 2.39317200  | 6.98400300  | -0.33167200 |
| C  | 2.51490700  | 5.60229200  | -0.23992000 |
| H  | -0.69138800 | 4.74009600  | -0.99296800 |
| H  | 3.46271200  | 5.14734400  | 0.01488100  |
| Cl | 1.53749500  | 3.08505900  | -0.36243200 |
| C  | 1.22082700  | 0.05998100  | -2.14579700 |
| H  | 2.27910600  | -0.07617200 | -2.35051700 |
| H  | 0.66074700  | -0.72187500 | -2.66239300 |
| H  | 0.92198300  | 1.04391500  | -2.51280000 |
| C  | 1.17509400  | 7.57551400  | -0.65831400 |
| H  | 1.10204600  | 8.65475900  | -0.72235400 |
| C  | 3.55736800  | 7.88828900  | -0.08089100 |
| O  | 3.49287600  | 9.08801400  | -0.14521800 |

|   |             |            |             |   |            |            |             |
|---|-------------|------------|-------------|---|------------|------------|-------------|
| O | 4.66861000  | 7.21844900 | 0.22208300  | H | 0.42225000 | 0.72132800 | -2.60318700 |
| H | 5.38582000  | 7.85104000 | 0.37633800  | C | 1.23203500 | 8.05512200 | -0.65879500 |
| N | -1.20628600 | 7.35811000 | -1.22934300 | H | 1.32055300 | 9.13538600 | -0.63663900 |
| H | -1.54947200 | 7.03714600 | -2.14110300 | C | 3.57298200 | 7.99135500 | 0.12074600  |
| H | -1.92479600 | 7.13214400 | -0.53270400 | O | 3.66421000 | 9.18839100 | 0.14303600  |
| H | -1.14226700 | 8.37932200 | -1.27507200 | O | 4.55416000 | 7.15512600 | 0.45477200  |

**Cation-Cation-Br Me-gua<sup>+</sup> TCM**

|   |             |             |             |
|---|-------------|-------------|-------------|
| C | 0.04450700  | -0.04571700 | 0.02368200  |
| N | 0.12267900  | 0.04808300  | 1.35039900  |
| N | 1.13604100  | 0.11195400  | -0.72160800 |
| N | -1.13223800 | -0.25452700 | -0.56205300 |
| H | -0.67466600 | -0.14425500 | 1.93619800  |
| H | 0.99585400  | 0.26378600  | 1.80540900  |
| H | 2.02716000  | 0.12741300  | -0.24655900 |
| H | -1.19321700 | -0.45991000 | -1.54674700 |
| H | -1.97342900 | -0.35323500 | -0.01544200 |
| C | 1.05560100  | 5.27991200  | -0.69058900 |
| C | -0.05112300 | 6.03004900  | -1.06312900 |
| C | 0.07206200  | 7.41241000  | -1.03515000 |
| C | 2.32402100  | 7.27312400  | -0.29016600 |
| C | 2.24623200  | 5.88562100  | -0.30388800 |
| H | -0.97734300 | 5.55261100  | -1.36150600 |
| H | 3.10215000  | 5.28925400  | -0.01701300 |
| C | 1.13650700  | 0.01413300  | -2.17850900 |
| H | 2.12897600  | 0.28241100  | -2.52951900 |
| H | 0.90667300  | -1.00151200 | -2.50878800 |

|    |             |            |             |
|----|-------------|------------|-------------|
| H  | 0.42225000  | 0.72132800 | -2.60318700 |
| C  | 1.23203500  | 8.05512200 | -0.65879500 |
| H  | 1.32055300  | 9.13538600 | -0.63663900 |
| C  | 3.57298200  | 7.99135500 | 0.12074600  |
| O  | 3.66421000  | 9.18839100 | 0.14303600  |
| O  | 4.55416000  | 7.15512600 | 0.45477200  |
| H  | 5.33301600  | 7.67047100 | 0.71304800  |
| N  | -1.09783300 | 8.22384800 | -1.42624300 |
| H  | -1.39544000 | 8.02103800 | -2.38661500 |
| H  | -1.90043100 | 8.05644200 | -0.80973400 |
| H  | -0.88741000 | 9.22571600 | -1.38185600 |
| Br | 0.94808700  | 3.38981000 | -0.70665200 |

**Cation-Cation-Br Me-gua<sup>+</sup> DCE**

|   |             |             |             |
|---|-------------|-------------|-------------|
| C | 0.00446200  | 0.00598000  | 0.00570100  |
| N | 0.04857900  | 0.14552000  | 1.32967300  |
| N | 1.11721700  | 0.12580800  | -0.71566600 |
| N | -1.15903400 | -0.21601600 | -0.60011300 |
| H | -0.77097800 | -0.00634200 | 1.89618900  |
| H | 0.90628300  | 0.39084300  | 1.79852600  |
| H | 1.99586400  | 0.14892600  | -0.21791700 |
| H | -1.20254100 | -0.45501800 | -1.57799300 |
| H | -2.01319500 | -0.27790200 | -0.06827300 |
| C | 1.12991300  | 5.25419400  | -0.71249200 |
| C | -0.00444900 | 5.97815800  | -1.05053300 |
| C | 0.07532300  | 7.36183600  | -0.99819100 |
| C | 2.34461200  | 7.27670600  | -0.29631200 |

|    |             |             |             |   |             |             |             |
|----|-------------|-------------|-------------|---|-------------|-------------|-------------|
| C  | 2.30863600  | 5.88718900  | -0.33568200 | H | -1.26748600 | 0.17680000  | -1.63686400 |
| H  | -0.92075000 | 5.47941400  | -1.34183100 | H | -2.04131600 | 0.38254500  | -0.11074100 |
| H  | 3.18621900  | 5.31088700  | -0.07479500 | C | 1.27113300  | 5.16040000  | -0.62044100 |
| C  | 1.15114700  | -0.01124400 | -2.16869600 | C | 0.08939700  | 5.79455300  | -0.97642800 |
| H  | 2.15565600  | 0.23349700  | -2.50212900 | C | 0.07733800  | 7.18217100  | -0.97601200 |
| H  | 0.91453900  | -1.03160800 | -2.47796800 | C | 2.35220400  | 7.27126300  | -0.28853700 |
| H  | 0.45652300  | 0.69335500  | -2.62915300 | C | 2.40779900  | 5.88186900  | -0.27559100 |
| C  | 1.22234100  | 8.03185300  | -0.62873600 | H | -0.79102000 | 5.22250500  | -1.24425800 |
| H  | 1.27124900  | 9.11372300  | -0.58926300 | H | 3.32178100  | 5.37310100  | -0.00021300 |
| C  | 3.58062300  | 8.01907900  | 0.10542500  | C | 1.12369400  | 0.00212200  | -2.19119000 |
| O  | 3.64474200  | 9.21847300  | 0.15229200  | H | 2.16260500  | -0.03610400 | -2.50565800 |
| O  | 4.59131300  | 7.20382200  | 0.40305100  | H | 0.60766800  | -0.88038500 | -2.57488800 |
| H  | 5.36070300  | 7.73511300  | 0.65678300  | H | 0.67539000  | 0.90967100  | -2.60052700 |
| N  | -1.12184400 | 8.14053200  | -1.36379700 | C | 1.18136600  | 7.93808300  | -0.64033500 |
| H  | -1.32460600 | 8.07589900  | -2.36742400 | H | 1.16318200  | 9.02146200  | -0.64293300 |
| H  | -1.95398500 | 7.81622700  | -0.85953700 | C | 3.53939500  | 8.10578900  | 0.07514900  |
| H  | -1.00199800 | 9.13381000  | -1.14300000 | O | 3.52627000  | 9.30825300  | 0.08429700  |
| Br | 1.07006400  | 3.36292500  | -0.76123900 | O | 4.60573300  | 7.36984700  | 0.38573000  |

**Cation-Cation-Br Me-gua<sup>+</sup> Acetone**

|   |             |             |             |
|---|-------------|-------------|-------------|
| C | -0.01794400 | 0.14059000  | -0.01868700 |
| N | 0.03693500  | 0.15453700  | 1.31209100  |
| N | 1.10088100  | 0.03631700  | -0.73257100 |
| N | -1.18932500 | 0.26538100  | -0.63638500 |
| H | -0.80350700 | 0.17873300  | 1.86765500  |
| H | 0.91868200  | 0.10043500  | 1.79692500  |
| H | 1.95767500  | -0.16172600 | -0.23576200 |

|    |             |            |             |
|----|-------------|------------|-------------|
| N  | -1.16663600 | 7.87044800 | -1.36525200 |
| H  | -1.32306500 | 7.82822100 | -2.37833200 |
| H  | -1.98712800 | 7.45894300 | -0.90917400 |
| H  | -1.14536600 | 8.86072500 | -1.10392300 |
| Br | 1.33614400  | 3.26880100 | -0.60020800 |

**Cation-Cation-Br Me-gua<sup>+</sup> DMSO**

|   |             |            |             |
|---|-------------|------------|-------------|
| C | -0.12578600 | 0.18922700 | -0.08729400 |
|---|-------------|------------|-------------|



|    |             |            |             |
|----|-------------|------------|-------------|
| C  | 3.55731800  | 8.18778700 | -0.06926900 |
| O  | 3.49179100  | 9.38839300 | -0.11195700 |
| O  | 4.67042600  | 7.51351500 | 0.21640700  |
| H  | 5.38791000  | 8.14390500 | 0.37817100  |
| N  | -1.20950600 | 7.67770200 | -1.21261000 |
| H  | -1.55937700 | 7.36573100 | -2.12481400 |
| H  | -1.92393600 | 7.44657500 | -0.51361100 |
| H  | -1.14389500 | 8.69911200 | -1.24942900 |
| Br | 1.54608100  | 3.23310500 | -0.42632400 |

**Cation-Cation-I Me-gua<sup>+</sup> TCM**

|   |             |             |             |
|---|-------------|-------------|-------------|
| C | -0.03726800 | 0.00765500  | -0.00439700 |
| N | 0.01336500  | 0.10874900  | 1.32179900  |
| N | 1.07782700  | 0.14462500  | -0.72564600 |
| N | -1.20287100 | -0.18523300 | -0.61407400 |
| H | -0.80572300 | -0.04395200 | 1.88897100  |
| H | 0.87589100  | 0.32936100  | 1.79405600  |
| H | 1.95579600  | 0.08996200  | -0.22739100 |
| H | -1.24831300 | -0.40559700 | -1.59643000 |
| H | -2.05755700 | -0.25797600 | -0.08374700 |
| C | 1.20965000  | 5.58626800  | -0.66002500 |
| C | 0.05705600  | 6.27572900  | -1.01130200 |
| C | 0.09892300  | 7.66274600  | -0.99106000 |
| C | 2.36999300  | 7.65636000  | -0.29709300 |
| C | 2.36955500  | 6.26503600  | -0.30155500 |
| H | -0.84890000 | 5.75058500  | -1.29130600 |
| H | 3.26725700  | 5.72720300  | -0.02675600 |

|   |             |             |             |
|---|-------------|-------------|-------------|
| C | 1.11060400  | -0.00164500 | -2.17985000 |
| H | 2.11665400  | 0.23471400  | -2.51503100 |
| H | 0.86645400  | -1.02165500 | -2.48447100 |
| H | 0.42293500  | 0.70811800  | -2.64258400 |
| C | 1.22847100  | 8.37390300  | -0.64541200 |
| H | 1.25336800  | 9.45799800  | -0.63751300 |
| C | 3.58650300  | 8.44276700  | 0.08525900  |
| O | 3.61416600  | 9.64310300  | 0.10536800  |
| O | 4.61921600  | 7.66159100  | 0.39794000  |
| H | 5.37471300  | 8.21916300  | 0.63631200  |
| N | -1.12270500 | 8.40151200  | -1.36980100 |
| H | -1.27701800 | 8.38697400  | -2.38437400 |
| H | -1.95598700 | 8.00464300  | -0.92365900 |
| H | -1.06835400 | 9.38360900  | -1.08296400 |
| I | 1.19739200  | 3.46931900  | -0.66636000 |

**Cation-Cation-I Me-gua<sup>+</sup> DCE**

|   |             |             |             |
|---|-------------|-------------|-------------|
| C | -0.04352300 | 0.02593500  | -0.01470500 |
| N | -0.01743900 | 0.14618100  | 1.31048900  |
| N | 1.08529400  | 0.14851900  | -0.71696200 |
| N | -1.19885800 | -0.17150500 | -0.64153400 |
| H | -0.85146400 | 0.01516600  | 1.86094300  |
| H | 0.83633000  | 0.37084700  | 1.79666600  |
| H | 1.95384700  | 0.10079900  | -0.20200100 |
| H | -1.23081300 | -0.40158200 | -1.62210200 |
| H | -2.06148400 | -0.23245800 | -0.12280400 |
| C | 1.20547100  | 5.57842600  | -0.66213400 |



|                                                   |             |             |             |   |             |             |             |
|---------------------------------------------------|-------------|-------------|-------------|---|-------------|-------------|-------------|
| C                                                 | 0.04903900  | 6.26917000  | -0.99786700 | H | -0.86983200 | 0.04825900  | 1.84884400  |
| C                                                 | 0.08992300  | 7.65620200  | -0.97260800 | H | 0.82202400  | 0.38647300  | 1.79754300  |
| C                                                 | 2.36943400  | 7.64656700  | -0.30275800 | H | 1.95481400  | 0.09723500  | -0.19092900 |
| C                                                 | 2.36928000  | 6.25511600  | -0.31352200 | H | -1.22254000 | -0.38430800 | -1.63592600 |
| H                                                 | -0.85998000 | 5.74565600  | -1.26995700 | H | -2.06425400 | -0.20378600 | -0.14394400 |
| H                                                 | 3.26934900  | 5.71519300  | -0.05131600 | C | 1.20296000  | 5.57333100  | -0.66272800 |
| C                                                 | 1.14491200  | -0.01263300 | -2.16796300 | C | 0.04453200  | 6.26426600  | -0.99144800 |
| H                                                 | 2.15687300  | 0.22243200  | -2.48596000 | C | 0.08453700  | 7.65131100  | -0.96377300 |
| H                                                 | 0.90810200  | -1.03589500 | -2.46701300 | C | 2.36782600  | 7.64090100  | -0.30469500 |
| H                                                 | 0.46446300  | 0.69047400  | -2.65129800 | C | 2.36830500  | 6.24934500  | -0.31872500 |
| C                                                 | 1.22358700  | 8.36487700  | -0.63474000 | H | -0.86549900 | 5.74094400  | -1.26011500 |
| H                                                 | 1.24558300  | 9.44843600  | -0.62213400 | H | 3.26964300  | 5.70876400  | -0.06247500 |
| C                                                 | 3.59061400  | 8.42884100  | 0.06661200  | C | 1.16176200  | -0.01947900 | -2.16222700 |
| O                                                 | 3.62497100  | 9.63031300  | 0.08786100  | H | 2.17730400  | 0.21114600  | -2.47217700 |
| O                                                 | 4.62659900  | 7.64680300  | 0.36769900  | H | 0.92390100  | -1.04312100 | -2.45900000 |
| H                                                 | 5.38496100  | 8.20410900  | 0.59718100  | H | 0.48767800  | 0.68354400  | -2.65455200 |
| N                                                 | -1.13273800 | 8.39614100  | -1.33749400 | C | 1.21983100  | 8.35915700  | -0.62897300 |
| H                                                 | -1.30018600 | 8.37722000  | -2.34963400 | H | 1.24021100  | 9.44247000  | -0.61323700 |
| H                                                 | -1.96256700 | 8.00487600  | -0.88030900 | C | 3.59091500  | 8.42146500  | 0.05879600  |
| H                                                 | -1.07292900 | 9.37975800  | -1.05758900 | O | 3.62766700  | 9.62345800  | 0.08258000  |
| I                                                 | 1.19444300  | 3.46164800  | -0.67614100 | O | 4.62926000  | 7.63923500  | 0.35198600  |
|                                                   |             |             |             | H | 5.38878300  | 8.19655200  | 0.57745900  |
|                                                   |             |             |             | N | -1.13844800 | 8.39169300  | -1.32281800 |
|                                                   |             |             |             | H | -1.31067700 | 8.37203000  | -2.33402100 |
|                                                   |             |             |             | H | -1.96709800 | 8.00223400  | -0.86206900 |
|                                                   |             |             |             | H | -1.07704300 | 9.37572800  | -1.04500500 |
|                                                   |             |             |             | I | 1.19363200  | 3.45661100  | -0.68022500 |
| <b>Cation-Cation-I Me-gua<sup>+</sup> Acetone</b> |             |             |             |   |             |             |             |
| C                                                 | -0.04496200 | 0.03642700  | -0.01930000 |   |             |             |             |
| N                                                 | -0.02864000 | 0.16227100  | 1.30557600  |   |             |             |             |
| N                                                 | 1.09061800  | 0.14784900  | -0.71277900 |   |             |             |             |
| N                                                 | -1.19611800 | -0.15637300 | -0.65473800 |   |             |             |             |

**Cation-Cation-I Me-gua<sup>+</sup> DMSO**

|   |             |             |             |
|---|-------------|-------------|-------------|
| C | -0.04510200 | 0.04465000  | -0.02217200 |
| N | -0.03445100 | 0.17396100  | 1.30248500  |
| N | 1.09497300  | 0.14477800  | -0.71019200 |
| N | -1.19403400 | -0.14136400 | -0.66330500 |
| H | -0.88047200 | 0.07454900  | 1.84112900  |
| H | 0.81501500  | 0.39481800  | 1.79815200  |
| H | 1.95639000  | 0.08855900  | -0.18443000 |
| H | -1.21725500 | -0.36564900 | -1.64538000 |
| H | -2.06617000 | -0.17628200 | -0.15844900 |
| C | 1.20310800  | 5.56920300  | -0.66365900 |
| C | 0.04277700  | 6.25903400  | -0.98803600 |
| C | 0.08075700  | 7.64617600  | -0.95829000 |
| C | 2.36629500  | 7.63752400  | -0.30557000 |
| C | 2.36868700  | 6.24596300  | -0.32221900 |
| H | -0.86726600 | 5.73491600  | -1.25490700 |
| H | 3.27135800  | 5.70584100  | -0.06979800 |
| C | 1.17211200  | -0.02571400 | -2.15871900 |
| H | 2.19096100  | 0.19700900  | -2.46367600 |
| H | 0.92798300  | -1.04794000 | -2.45527100 |
| H | 0.50573000  | 0.68125800  | -2.65585100 |
| C | 1.21617500  | 8.35460400  | -0.62483200 |
| H | 1.23442700  | 9.43777300  | -0.60630100 |
| C | 3.58961900  | 8.41832000  | 0.05480800  |
| O | 3.62624200  | 9.62063400  | 0.08109600  |
| O | 4.63037700  | 7.63703300  | 0.34231000  |

|   |             |            |             |
|---|-------------|------------|-------------|
| H | 5.38997100  | 8.19507900 | 0.56567200  |
| N | -1.14321100 | 8.38578600 | -1.31342100 |
| H | -1.31988200 | 8.36371400 | -2.32372100 |
| H | -1.97041900 | 7.99823400 | -0.84849900 |
| H | -1.08062800 | 9.37065100 | -1.03897100 |
| I | 1.19703000  | 3.45251700 | -0.68307800 |

**Cation-Cation-I Me-gua<sup>+</sup> Water**

|   |             |             |             |
|---|-------------|-------------|-------------|
| C | -0.04521700 | 0.04804600  | -0.02307600 |
| N | -0.03662300 | 0.17658300  | 1.30170000  |
| N | 1.09668300  | 0.14312600  | -0.70876400 |
| N | -1.19348100 | -0.13312900 | -0.66672800 |
| H | -0.88518100 | 0.08650500  | 1.83802000  |
| H | 0.81240100  | 0.39532100  | 1.79912700  |
| H | 1.95691400  | 0.08467100  | -0.18135100 |
| H | -1.21562500 | -0.35415500 | -1.64955100 |
| H | -2.06709400 | -0.16374800 | -0.16419000 |
| C | 1.20351200  | 5.56724500  | -0.66407500 |
| C | 0.04232800  | 6.25641200  | -0.98673900 |
| C | 0.07927700  | 7.64362300  | -0.95625600 |
| C | 2.36567500  | 7.63607300  | -0.30603500 |
| C | 2.36907100  | 6.24453800  | -0.32363600 |
| H | -0.86761300 | 5.73179300  | -1.25292800 |
| H | 3.27235100  | 5.70476700  | -0.07267100 |
| C | 1.17636600  | -0.02802000 | -2.15696800 |
| H | 2.19632100  | 0.19257300  | -2.45985000 |
| H | 0.93060000  | -1.04973300 | -2.45388000 |

|                                                          |             |             |             |                                                          |             |             |             |
|----------------------------------------------------------|-------------|-------------|-------------|----------------------------------------------------------|-------------|-------------|-------------|
| H                                                        | 0.51259800  | 0.68021900  | -2.65578100 | O                                                        | 2.44912400  | -2.48350000 | -0.00002900 |
| C                                                        | 1.21460600  | 8.35250200  | -0.62340700 | O                                                        | 3.80441400  | -0.67872700 | 0.00002600  |
| H                                                        | 1.23197700  | 9.43562300  | -0.60388300 | H                                                        | 4.48766300  | -1.36752900 | 0.00001300  |
| C                                                        | 3.58894100  | 8.41726200  | 0.05310700  | H                                                        | 0.39237600  | 3.82027000  | -0.82791300 |
| O                                                        | 3.62513300  | 9.61969000  | 0.08050700  | Br                                                       | -2.66980700 | -0.63174600 | 0.00000400  |
| O                                                        | 4.63081900  | 7.63655100  | 0.33820200  |                                                          |             |             |             |
| H                                                        | 5.39034100  | 8.19502300  | 0.56071900  |                                                          |             |             |             |
| N                                                        | -1.14524900 | 8.38265400  | -1.31001600 | <b>HOOC-phBr-NH<sub>3</sub><sup>+</sup> Vacuum G4MP2</b> |             |             |             |
| H                                                        | -1.32280400 | 8.36068500  | -2.32013900 | C                                                        | -0.90119700 | 0.04648400  | -0.00045700 |
| H                                                        | -1.97200100 | 7.99479900  | -0.84456400 | C                                                        | 0.15011600  | -0.82402000 | 0.00028800  |
| H                                                        | -1.08302000 | 9.36755400  | -1.03566900 | C                                                        | 1.50847700  | -0.33449700 | -0.00059700 |
| I                                                        | 1.19908800  | 3.45057800  | -0.68431800 | C                                                        | 1.69667000  | 1.07355100  | -0.00047000 |
|                                                          |             |             |             | C                                                        | 0.59656900  | 1.88317000  | -0.00199700 |
|                                                          |             |             |             | C                                                        | -0.74990600 | 1.45904900  | -0.00006800 |
|                                                          |             |             |             | H                                                        | -0.00084400 | -1.89508600 | 0.00270100  |
| <b>HOOC-phBr-NH<sub>3</sub><sup>+</sup> Vacuum G4MP2</b> |             |             |             | H                                                        | 2.70482900  | 1.47605500  | 0.00291400  |
| C                                                        | -0.91414300 | 0.05349100  | 0.00000100  | H                                                        | -1.59116800 | 2.13657200  | -0.01645100 |
| C                                                        | 0.17728900  | -0.81413300 | 0.00001000  | N                                                        | 0.81983900  | 3.35191800  | 0.00197000  |
| C                                                        | 1.47598100  | -0.30822400 | 0.00000800  | H                                                        | 0.39273000  | 3.79278900  | 0.82842500  |
| C                                                        | 1.69925500  | 1.07177300  | -0.00000700 | H                                                        | 1.82061300  | 3.55742700  | 0.00149200  |
| C                                                        | 0.59023600  | 1.89630300  | -0.00002200 | C                                                        | 2.60145500  | -1.26430600 | -0.00031800 |
| C                                                        | -0.71836800 | 1.43409500  | -0.00001800 | O                                                        | 2.52340700  | -2.48524200 | 0.00058600  |
| H                                                        | 0.03992800  | -1.88873100 | 0.00000900  | O                                                        | 3.84165300  | -0.64663600 | -0.00062100 |
| H                                                        | 2.71338900  | 1.45453900  | -0.00000200 | H                                                        | 4.46626200  | -1.38370100 | 0.00036700  |
| H                                                        | -1.56758000 | 2.10863300  | -0.00003200 | H                                                        | 0.39209000  | 3.79758800  | -0.82112700 |
| N                                                        | 0.80554200  | 3.37575400  | 0.00000700  | Br                                                       | -2.69305600 | -0.63218900 | 0.00028200  |
| H                                                        | 0.39289400  | 3.82018500  | 0.82823500  |                                                          |             |             |             |
| H                                                        | 1.80690300  | 3.59456600  | -0.00029600 |                                                          |             |             |             |
| C                                                        | 2.60817800  | -1.29385100 | -0.00000200 | <b>[HOOC-ph-NH<sub>3</sub><sup>+</sup>] Vacuum G4MP2</b> |             |             |             |

|   |             |             |             |    |             |             |             |
|---|-------------|-------------|-------------|----|-------------|-------------|-------------|
| C | -0.99798200 | 1.92809400  | -0.00001500 | H  | -1.57683700 | 2.11024900  | -0.00945200 |
| C | 0.32717600  | 1.57457500  | 0.00018100  | N  | 0.76898900  | 3.37128200  | -0.07054100 |
| C | 0.61793000  | 0.20230300  | 0.00007600  | H  | 0.00273600  | 3.93375000  | 0.26729000  |
| C | -0.42050200 | -0.73570000 | -0.00019200 | H  | 1.66166400  | 3.70301000  | 0.26230800  |
| C | -1.72771100 | -0.28018400 | -0.00039600 | C  | 2.61896300  | -1.21254100 | 0.00153000  |
| C | -2.07173700 | 1.07239300  | -0.00028800 | O  | 2.51295700  | -2.41493500 | 0.00309700  |
| H | 1.14279700  | 2.28974400  | 0.00023700  | O  | 3.82422300  | -0.59377000 | 0.00446100  |
| H | -0.17950700 | -1.79287400 | -0.00031300 | H  | 4.48392600  | -1.30259800 | 0.00565100  |
| H | -3.10008200 | 1.42132900  | -0.00051600 | Br | -2.65922800 | -0.62561600 | 0.00245800  |
| N | -2.82925100 | -1.29435500 | 0.00038800  |    |             |             |             |
| H | -3.43078600 | -1.20183300 | -0.82613800 |    |             |             |             |
| H | -2.44613300 | -2.24517100 | -0.00241900 |    |             |             |             |
| C | 2.06193800  | -0.20898600 | 0.00004800  |    |             |             |             |
| O | 2.97050500  | 0.57503900  | 0.00021600  |    |             |             |             |
| O | 2.19962200  | -1.54711800 | -0.00021000 |    |             |             |             |
| H | 3.14974500  | -1.74396100 | -0.00020500 |    |             |             |             |
| H | -3.42696600 | -1.20509300 | 0.83010700  |    |             |             |             |

**HOOC-phBr-NH<sub>2</sub> Vacuum G4MP2**

|   |             |             |             |
|---|-------------|-------------|-------------|
| C | -0.88410600 | 0.07644700  | -0.00399300 |
| C | 0.18929700  | -0.80028500 | -0.00293600 |
| C | 1.47764200  | -0.25656200 | -0.00320300 |
| C | 1.67668400  | 1.12225000  | -0.00541000 |
| C | 0.58117600  | 1.99584400  | -0.00833800 |
| C | -0.71356500 | 1.45452100  | -0.00601400 |
| H | 0.05967600  | -1.87334700 | 0.00017600  |
| H | 2.68491100  | 1.51812400  | -0.00850200 |

**[HOOC-phBr-NH<sub>2</sub>]<sup>-</sup> Vacuum G4MP2**

|   |             |             |             |
|---|-------------|-------------|-------------|
| C | -0.86783200 | 0.07983800  | -0.00766800 |
| C | 0.17817800  | -0.79805700 | -0.00155600 |
| C | 1.51886400  | -0.28284400 | -0.00825500 |
| C | 1.67324500  | 1.14888500  | -0.00589600 |
| C | 0.58113200  | 1.99076200  | -0.01930500 |
| C | -0.74097800 | 1.48338100  | -0.01720200 |
| H | 0.03533500  | -1.86999500 | 0.01454100  |
| H | 2.67488400  | 1.56605900  | 0.00908600  |
| H | -1.60018000 | 2.13765400  | -0.07623800 |
| N | 0.75237900  | 3.40745300  | -0.08281700 |
| H | 0.06855400  | 3.87529700  | 0.50337100  |
| H | 1.67527800  | 3.66571500  | 0.24853700  |
| C | 2.60605200  | -1.19647000 | 0.00014000  |
| O | 2.57107700  | -2.43800800 | 0.01007100  |
| O | 3.87066200  | -0.58012500 | 0.00145900  |
| H | 4.45652400  | -1.34710900 | 0.00896300  |

Br -2.68008400 -0.63679100 0.00393400

**HOOC-ph-NH<sub>2</sub>· Vacuum G4MP2**

C 1.08597300 1.87475700 0.00392100

C -0.25062700 1.57604300 0.00329600

C -0.56062600 0.20359500 -0.00154000

C 0.44988600 -0.75874400 -0.00711200

C 1.80335900 -0.39121100 -0.00852100

C 2.12667800 0.98236700 -0.00066300

H -1.04648600 2.30965000 0.00731600

H 0.18113700 -1.80823100 -0.01395300

H 3.16505700 1.30127900 -0.00119700

N 2.80384400 -1.35650900 -0.07404600

H 3.70507800 -1.06984200 0.27797500

H 2.54178000 -2.27113600 0.26290000

C -2.00034000 -0.17191100 0.00145600

O -2.91958200 0.61110200 0.00537300

O -2.19802300 -1.51351900 -0.00032400

H -3.15844700 -1.63619600 -0.00014900

**<sup>-</sup>OOC-phBr-NH<sub>2</sub> Vacuum G4MP2**

C -0.82316800 0.08344700 -0.00964600

C 0.22982500 -0.81174700 -0.00984300

C 1.53258300 -0.29853900 -0.01329100

C 1.72867400 1.07833000 -0.01865900

C 0.65261200 1.96976500 -0.01942200

C -0.65292000 1.46386200 -0.01521700

H 0.10766600 -1.88728500 -0.00181000

H 2.75948600 1.42235100 -0.01547200

H -1.50813700 2.13055100 -0.01999100

N 0.86867200 3.36751500 -0.07678900

H 0.16183700 3.89243100 0.42258300

H 1.78408600 3.61662200 0.27578800

C 2.75851400 -1.26934300 0.00431500

O 2.46353000 -2.48094200 0.00597400

O 3.86850000 -0.69754800 0.01674700

Br -2.64567500 -0.58897200 0.00529200

**<sup>-</sup>OOC-ph-NH<sub>2</sub>· Vacuum G4MP2**

C 0.99164700 1.88769600 0.00743700

C -0.33269000 1.53187200 0.00390100

C -0.61125500 0.15182300 -0.01020400

C 0.43966000 -0.76318300 -0.02164200

C 1.77627900 -0.35431900 -0.01879100

C 2.06461600 1.02268000 -0.00333900

H -1.17669400 2.21245000 0.01598600

H 0.16905500 -1.81527500 -0.02666500

H 3.09622800 1.36912800 -0.00459700

N 2.82861400 -1.30621000 -0.08261100

H 3.64396000 -1.00736800 0.43877600

H 2.52777200 -2.20777800 0.26750000

C -2.09880000 -0.34389400 0.00261000

O -2.95570500 0.56124300 0.01036000

O -2.22396500 -1.58670900 0.00557100

**HOOC-CH<sub>2</sub>-NH<sub>3</sub><sup>+</sup> Vacuum G4MP2**

|   |             |             |             |
|---|-------------|-------------|-------------|
| N | 1.79197800  | 0.03246800  | -0.00002200 |
| H | 1.36826900  | 0.99994900  | 0.00005400  |
| C | 0.57663600  | -0.85411900 | 0.00001900  |
| C | -0.61547600 | 0.12971200  | -0.00000400 |
| H | 0.58101600  | -1.48710800 | -0.88949200 |
| H | 0.58106300  | -1.48688000 | 0.88969200  |
| O | -0.38171800 | 1.31271200  | 0.00003100  |
| H | 2.37848400  | -0.08812900 | -0.82859700 |
| O | -1.83376000 | -0.36274800 | -0.00004900 |
| H | -1.87451300 | -1.33012400 | 0.00017500  |
| H | 2.37869600  | -0.08826300 | 0.82838500  |

**[HOOC-CH<sub>2</sub>-NH<sub>3</sub>]<sup>2+</sup> Vacuum G4MP2**

|   |             |             |             |
|---|-------------|-------------|-------------|
| N | -1.90024300 | 0.03452600  | -0.00032700 |
| H | -2.01682700 | 0.63115200  | 0.83478300  |
| C | -0.61799600 | -0.75646600 | 0.00046700  |
| C | 0.68942000  | 0.08114500  | 0.00009300  |
| H | -0.59039100 | -1.38318600 | 0.90306200  |
| H | -0.59037000 | -1.38472300 | -0.90099500 |
| O | 0.50103000  | 1.32479300  | 0.00017800  |
| H | -2.69668900 | -0.62641700 | -0.00020400 |
| O | 1.85180000  | -0.40873100 | -0.00029100 |
| H | 1.96089000  | -1.38524500 | -0.00055400 |
| H | -2.01609600 | 0.63016800  | -0.83626200 |

**HOOC-CH<sub>2</sub>-NH<sub>2</sub> Vacuum G4MP2**

|   |             |             |             |
|---|-------------|-------------|-------------|
| N | 1.95659800  | -0.04164100 | 0.00008400  |
| C | 0.68732000  | -0.74040600 | -0.00008100 |
| C | -0.55655900 | 0.15779600  | -0.00012000 |
| H | 0.63254600  | -1.40046000 | -0.87694500 |
| H | 0.63241000  | -1.40050500 | 0.87673500  |
| O | -0.51891500 | 1.35565800  | -0.00009500 |
| H | 1.98823500  | 0.57889500  | 0.80452400  |
| O | -1.74613100 | -0.49561200 | 0.00027400  |
| H | -1.60222300 | -1.45038500 | -0.00111500 |
| H | 1.98865900  | 0.57923600  | -0.80401300 |

**[HOOC-CH<sub>2</sub>-NH<sub>2</sub>]<sup>+</sup> Vacuum G4MP2**

|   |             |             |             |
|---|-------------|-------------|-------------|
| N | 1.94705900  | 0.04888900  | -0.00063500 |
| C | 0.82248900  | -0.71426200 | 0.00099400  |
| C | -0.68888600 | 0.19376700  | 0.00005600  |
| H | 0.69962100  | -1.29319500 | -0.91817700 |
| H | 0.69998200  | -1.28982400 | 0.92236800  |
| O | -0.65615100 | 1.36824400  | 0.00019800  |
| H | 2.33481100  | 0.41575300  | -0.86293200 |
| O | -1.71764300 | -0.60776500 | -0.00062100 |
| H | -1.51005100 | -1.55505600 | 0.00018200  |
| H | 2.33495900  | 0.41923400  | 0.86009300  |

**<sup>-</sup>OOC-CH<sub>2</sub>-NH<sub>2</sub> Vacuum G4MP2**

|   |             |             |            |
|---|-------------|-------------|------------|
| N | -1.88283300 | 0.04156700  | 0.00346900 |
| C | -0.65079100 | -0.77239700 | 0.11475000 |

|   |             |             |             |
|---|-------------|-------------|-------------|
| C | 0.67673900  | 0.06748100  | 0.00087700  |
| H | -0.63598900 | -1.27747000 | 1.09335700  |
| H | -0.63727200 | -1.57271700 | -0.63509800 |
| O | 0.51145400  | 1.31339700  | 0.04035900  |
| H | -2.11039300 | 0.09126100  | -0.98913300 |
| O | 1.72682300  | -0.59866700 | -0.08666000 |
| H | -1.49842100 | 0.97961100  | 0.18323400  |

**[CH<sub>2</sub>NH<sub>2</sub>· + CO<sub>2</sub>] Vacuum G4MP2**

|   |             |             |             |
|---|-------------|-------------|-------------|
| N | -2.13669400 | 0.37437600  | -0.17897400 |
| C | -1.53873800 | -0.81120000 | 0.24448800  |
| C | 1.40689200  | 0.13535800  | -0.01193300 |
| H | -1.32125200 | -0.87841500 | 1.30538600  |
| H | -1.85957800 | -1.71601000 | -0.25952700 |
| O | 0.97947500  | 1.20770300  | 0.14710200  |
| H | -2.27157900 | 0.45012900  | -1.17809000 |
| O | 1.88408600  | -0.91222700 | -0.17166700 |
| H | -1.70814400 | 1.21490600  | 0.18623400  |

**Methylguanidine Vacuum G4MP2**

|   |             |             |             |
|---|-------------|-------------|-------------|
| C | 0.61814500  | -0.07240300 | -0.00238500 |
| N | 1.76004700  | -0.65533800 | 0.02638900  |
| N | -0.61811300 | -0.69296700 | -0.04276800 |
| N | 0.56403800  | 1.31997700  | -0.08254600 |
| H | 1.65827000  | -1.66609400 | -0.05130500 |
| H | -0.61355800 | -1.65668800 | 0.24486000  |
| H | -0.11101500 | 1.76528600  | 0.52376000  |

|   |             |             |             |
|---|-------------|-------------|-------------|
| H | 1.49092400  | 1.70540500  | 0.03606700  |
| C | -1.89144200 | -0.00501700 | -0.00350100 |
| H | -2.68482800 | -0.70904800 | -0.26703700 |
| H | -2.13958400 | 0.42170600  | 0.98223000  |
| H | -1.90222700 | 0.80225200  | -0.74079200 |

**[Methylguanidine·]<sup>+</sup> Vacuum G4MP2**

|   |             |             |             |
|---|-------------|-------------|-------------|
| C | 0.55427100  | -0.03891300 | 0.00002200  |
| N | 1.75461800  | -0.70031800 | -0.00006500 |
| N | -0.62105700 | -0.66230800 | 0.00004600  |
| N | 0.65084700  | 1.28720300  | 0.00000900  |
| H | 1.62914800  | -1.71809100 | 0.00016000  |
| H | -0.60631500 | -1.67275800 | 0.00009100  |
| H | -0.14471300 | 1.90698600  | 0.00015200  |
| H | 1.57879000  | 1.68876400  | -0.00004200 |
| C | -1.91931400 | 0.00798900  | -0.00003500 |
| H | -2.70232800 | -0.74847700 | -0.00026100 |
| H | -2.02772300 | 0.62842600  | 0.89658900  |
| H | -2.02746000 | 0.62865700  | -0.89653400 |

**Methylguanidinium<sup>+</sup> Vacuum G4MP2**

|   |             |             |             |
|---|-------------|-------------|-------------|
| C | -0.51410800 | -0.00650200 | -0.01322200 |
| N | -0.52415100 | 1.32827400  | -0.00766000 |
| N | -1.67213100 | -0.67568500 | 0.02232200  |
| N | 0.63952500  | -0.66935200 | -0.04368200 |
| C | 1.96177300  | -0.04767100 | 0.03837300  |
| H | 0.31547600  | 1.85807700  | -0.17066700 |

|   |             |             |             |
|---|-------------|-------------|-------------|
| H | -1.37509100 | 1.84477900  | 0.14332900  |
| H | -2.55422400 | -0.20473500 | -0.09409000 |
| H | -1.69851900 | -1.67131100 | 0.16939300  |
| H | 0.59994100  | -1.66549900 | -0.19391800 |
| H | 2.01576600  | 0.62351400  | 0.89992400  |
| H | 2.69872300  | -0.83767000 | 0.17813700  |
| H | 2.20923800  | 0.49521900  | -0.87987600 |

**[Methylguanidinium]<sup>2+</sup> Vacuum G4MP2**

|   |             |             |             |
|---|-------------|-------------|-------------|
| C | 0.56832000  | 0.02750500  | 0.02652200  |
| N | 0.64323600  | 1.33745500  | 0.02382100  |
| N | 1.59665400  | -0.79339700 | -0.06006600 |
| N | -0.70312300 | -0.58795300 | 0.13171600  |
| C | -1.97565700 | -0.00847000 | -0.11163000 |
| H | -0.13941100 | 1.93823200  | 0.26020100  |
| H | 1.53324000  | 1.81508600  | -0.10807600 |
| H | 2.55370800  | -0.44390500 | -0.09870700 |
| H | 1.49812600  | -1.79840400 | -0.18104500 |
| H | -0.70004200 | -1.57193700 | 0.42802300  |
| H | -1.93112100 | 0.98990700  | -0.54250700 |
| H | -2.55919200 | -0.70665700 | -0.75317500 |
| H | -2.56865300 | -0.02926500 | 0.83763500  |
